# Supplementary material for: Oncogenic PKA signaling increases c-MYC protein expression through multiple targetable mechanisms
Source: eLife journal article supplement (doi:10.7554/elife.69521), 2023-01-24

10/14/21  
+ control

Col PLK1  
70' 120' 70' 120' P/E

pKa  
substrate

130-  
Colo741 FLX1  
0' 30' 2h 0' 30' 2h FSK/BMX  
pKa  
substrate  
pPKA  
substrate

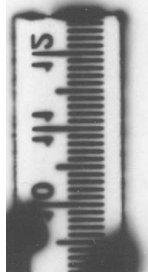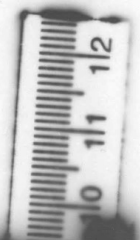

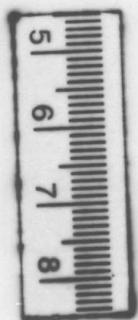

10/7/02

Colo741

0' 30' 2h FSK/IBMX

Colo  
741 P/K

550

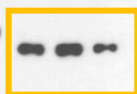

pGSK3B Ser9

(4h)

550

550

(4h)

2 lanes  
1 lane

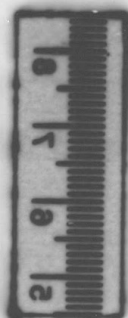

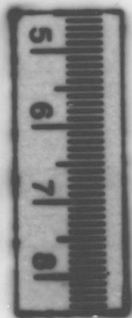

FLX1  
0' 30' 2h FSK/IBMX

PLV1  
0 70nm FSK

55

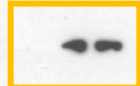

1 (SK)

pGSK3B Ser9

12.5hr

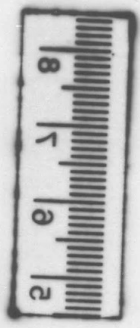

0

12.5hr

1 (SK)

222



10  
11  
12

8/11/22

Colo741      FLX1  
0' 30' 2h    0' 30' 2h    FSK/IBMX

Colo  
0' 30' 2h

FLX1  
0' 30' 2h FSK

55-

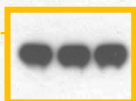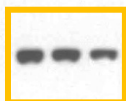

+ GSK3 $\beta$   
GSK3B

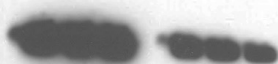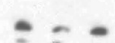

55  
11  
12

Colo741

0' 30' 2h

10/2/22  
35-

COLO741

0' 30' 2h FSK/IBMX

Ctl.

35-  
pMAPK1/3  
Thr202/Thr204

152K

0' 30' 2h

FSK

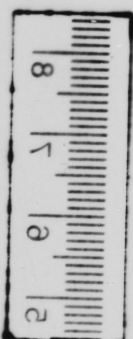



10/7/22  
Panda

FLX1  
0' 30' 2h FSK/IBMX

PT1  
0 30' 2h FSK

35-

pMAPK1/3  
Thr202/Thr204

4h

PT1

FLX1

30' 2h

Cult.

0

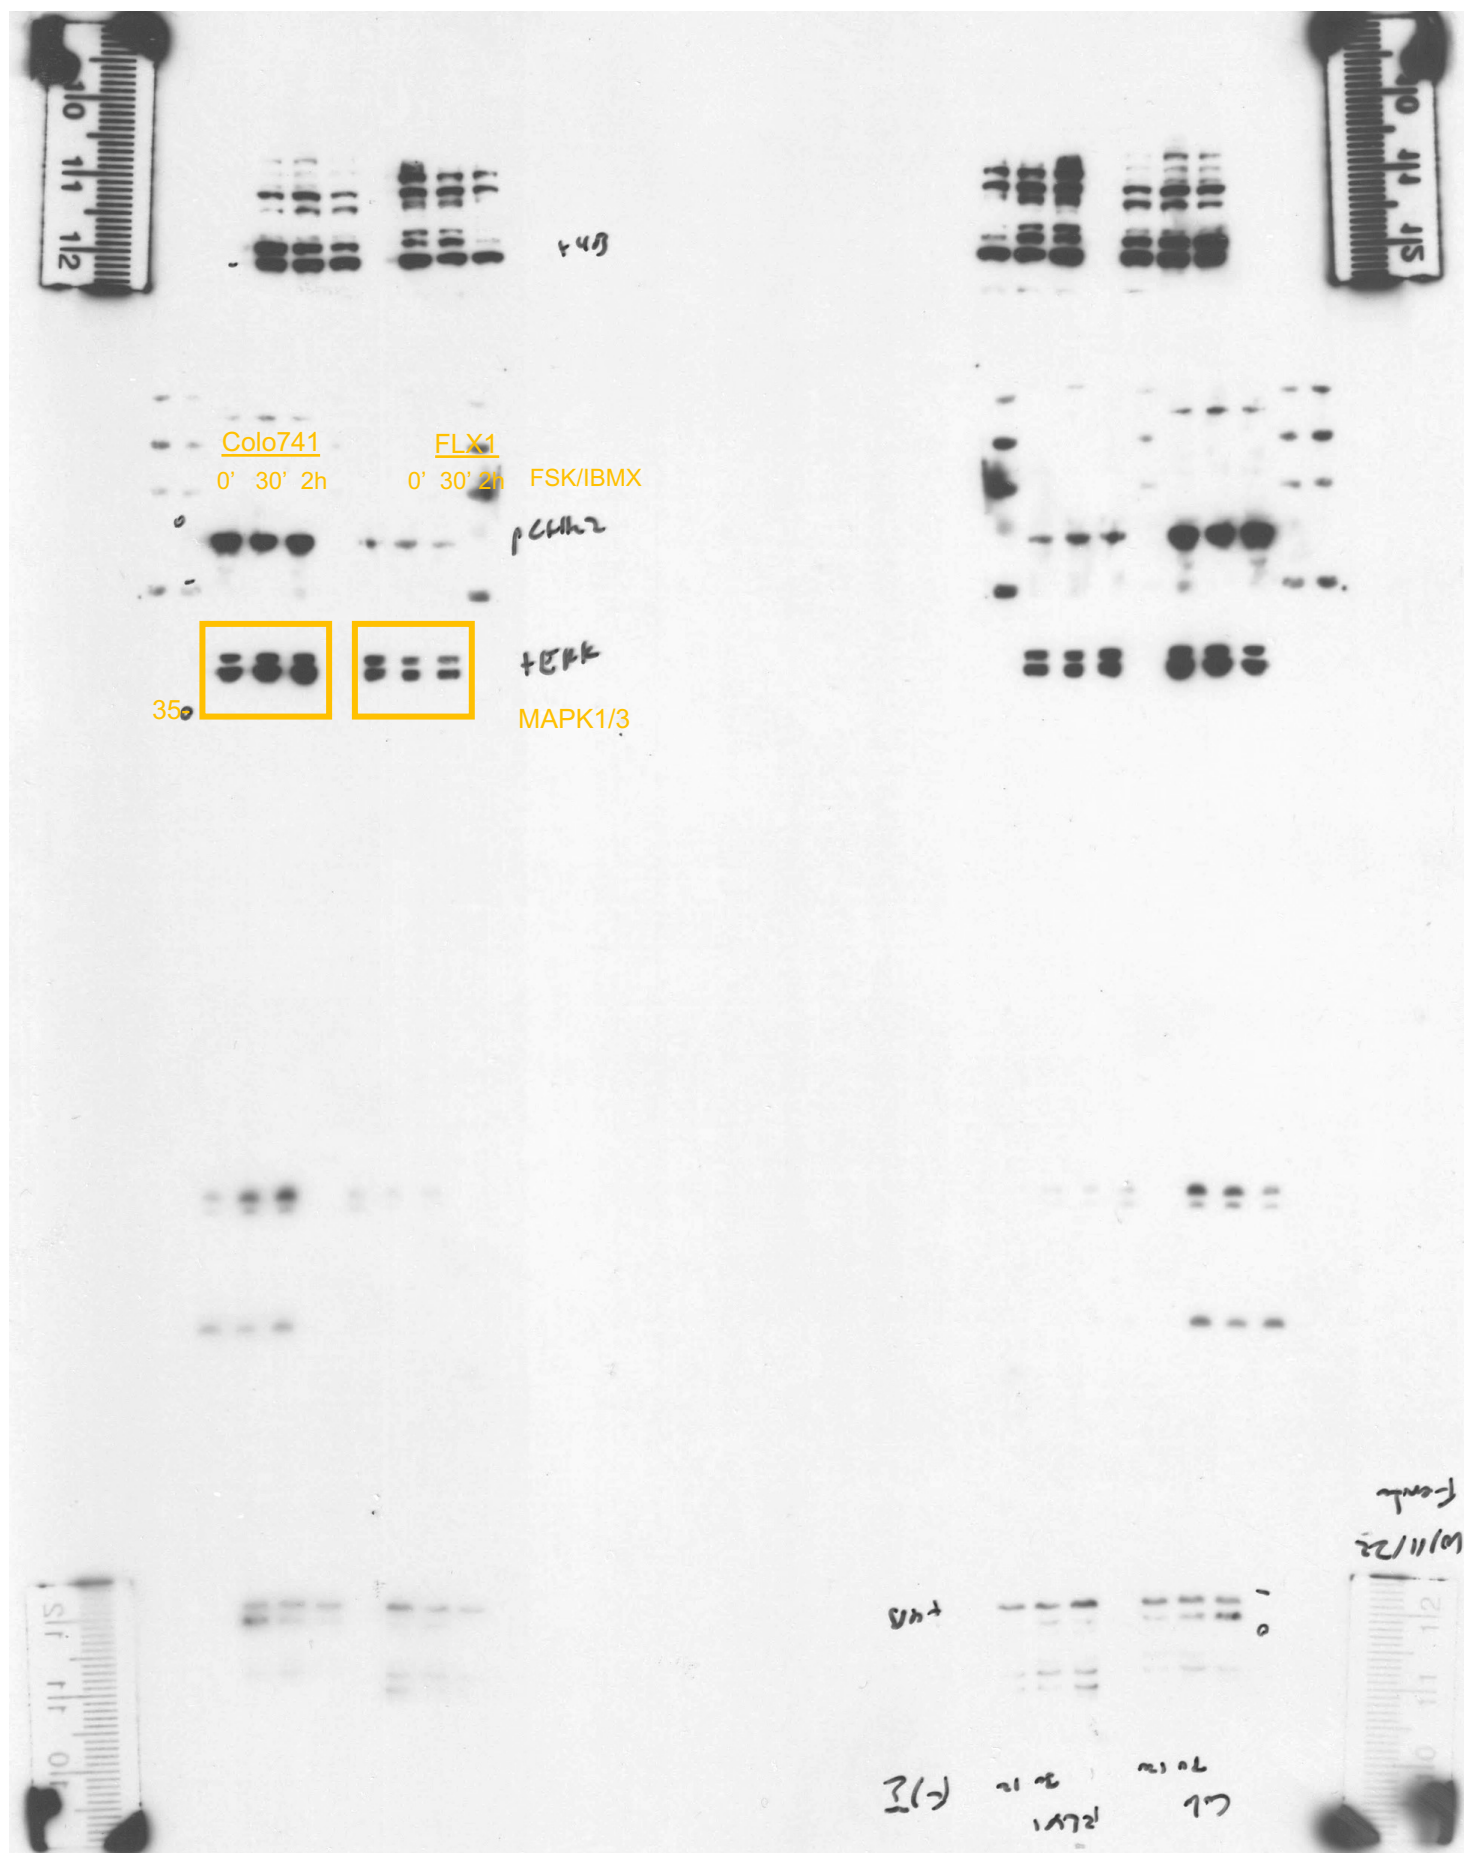

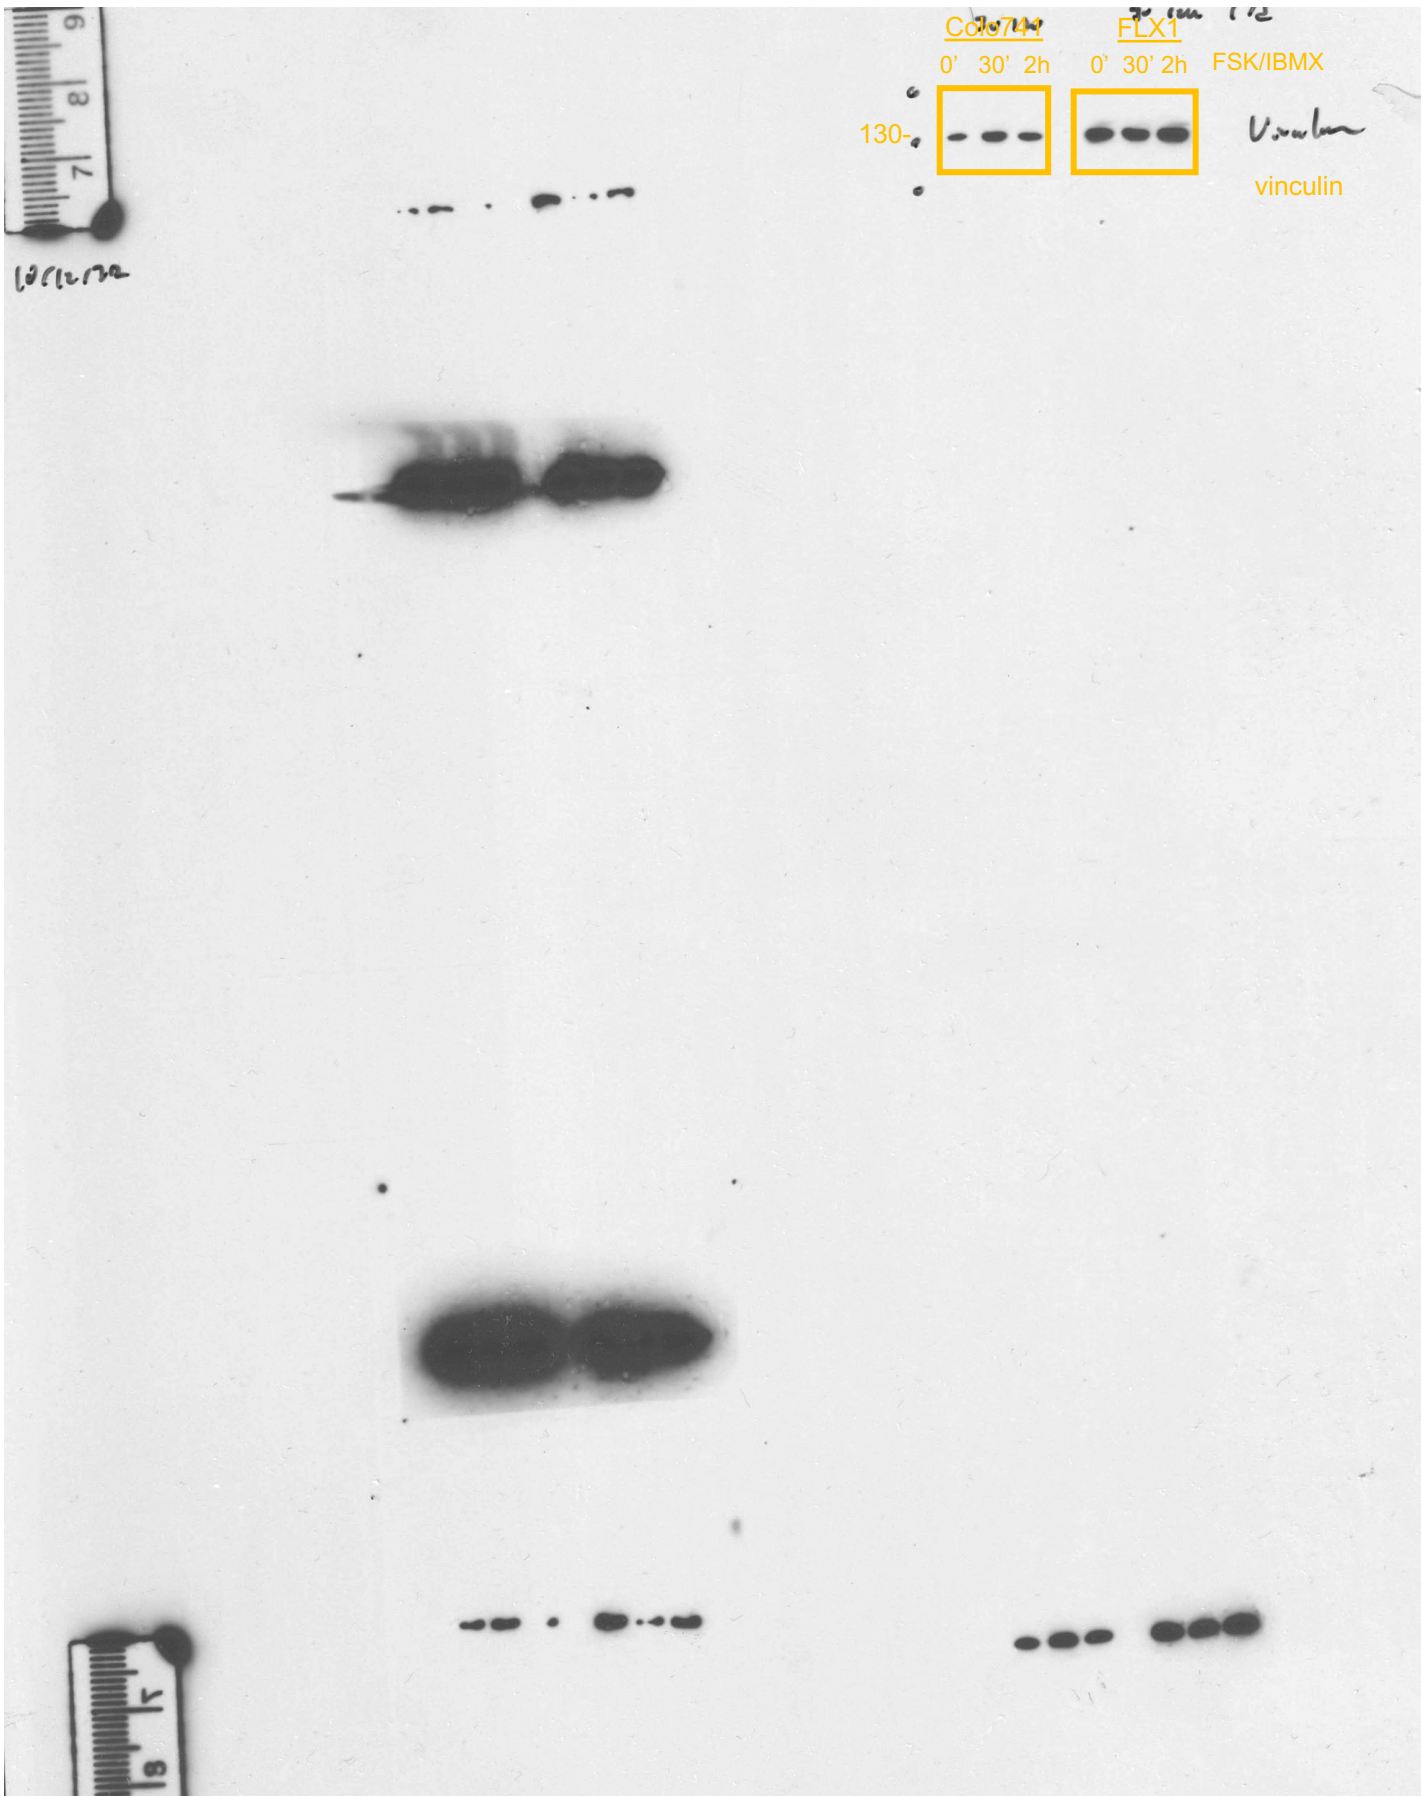

Supplement: fig2-data6 [file Fig2 marked up.pdf › 2F/Fig2 marked up.pdf]
