# Supplementary material for: Oncogenic PKA signaling increases c-MYC protein expression through multiple targetable mechanisms
Source: eLife journal article supplement (doi:10.7554/elife.69521), 2023-01-24

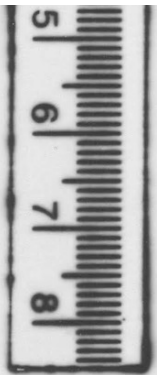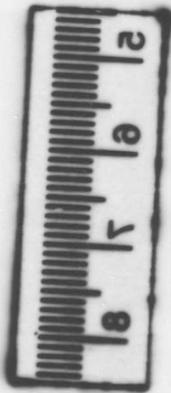

95

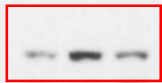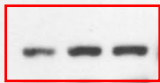

140

pelF4B  
S422

Colo741  
0' 30' 2h

FLX1  
0' 30' 2h FSK/IBMX

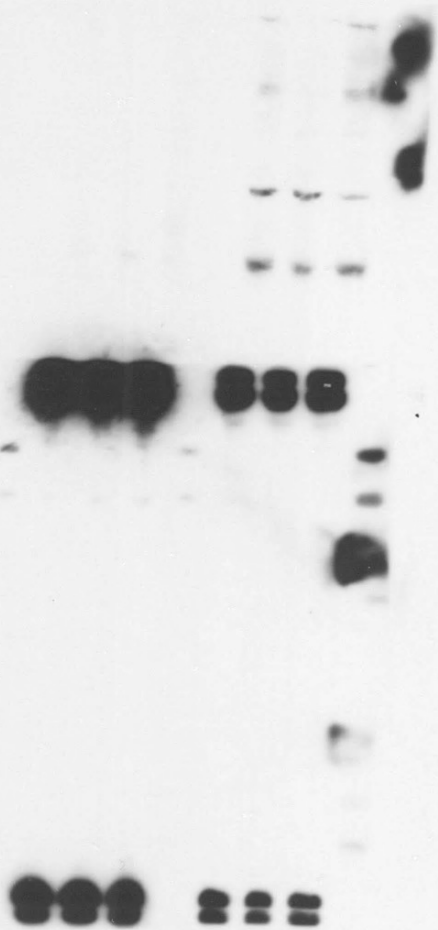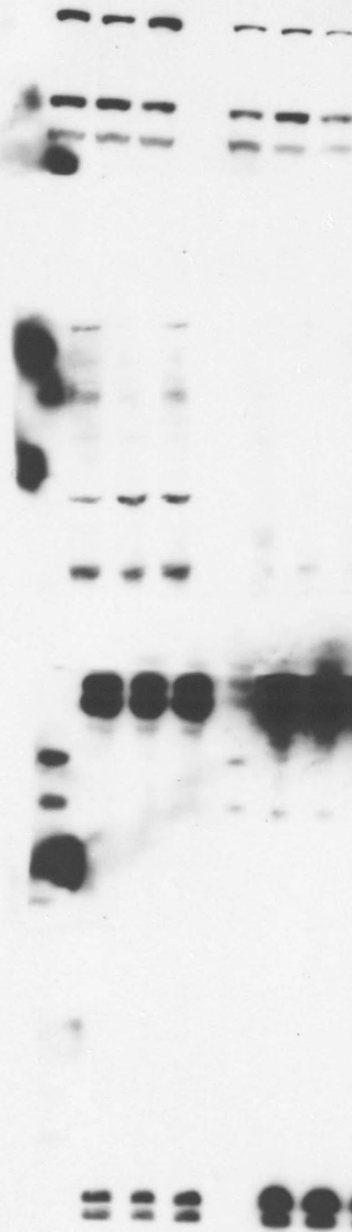

140

Colo741  
FLX1

10/17/22

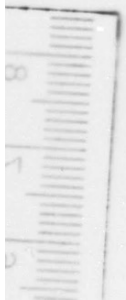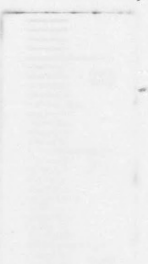

Colo/41  
0' 30' 2h

FLX1  
0' 30' 2h FSK/IBMX

95-

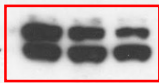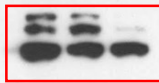

~40 eIF4B

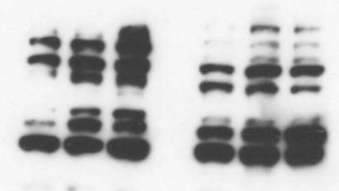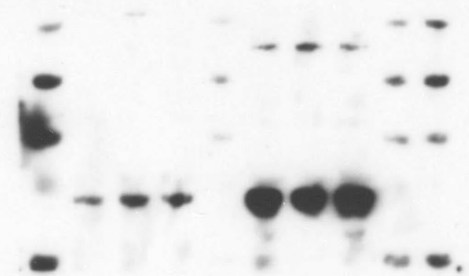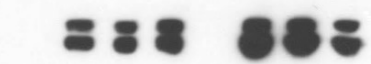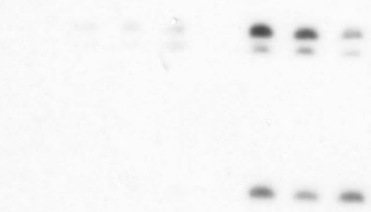

p70S6

p4E

~40

1  
0

Colo741  
0' 30' 2h

FLX1  
0' 30' 2h FSK/IBMX

Colo  
30' 2h

FLX1  
30' 2h FSK/IBMX

55

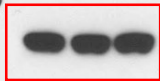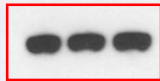

Actin

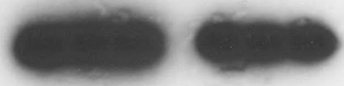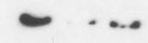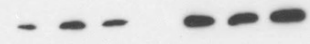

Supplement: fig6-data2 [file 6B markup.pdf › 6B/6B markup.pdf]
