# Supplementary material for: Oncogenic PKA signaling increases c-MYC protein expression through multiple targetable mechanisms
Source: eLife journal article supplement (doi:10.7554/elife.69521), 2023-01-24

3xFLAG-PRKACA

639V + Colo741 + ML1 + Dox

12/17/20  
639V Colo ML1  
N/A N/A N/A  
+ + +

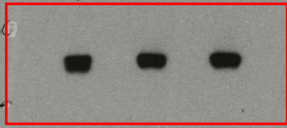

Flag

FLAG

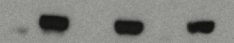

Flag

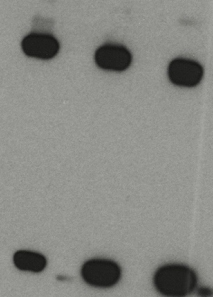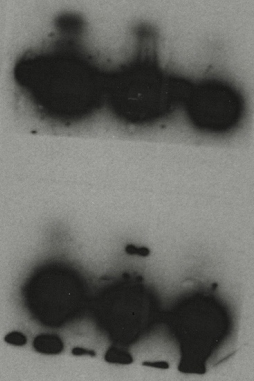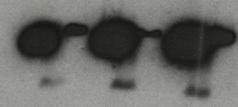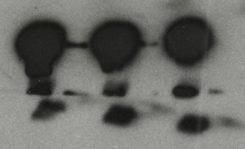



3xFLAG-PRKACA

639V

Colo741

ML1

Dox

+

+

+

FL-PKAc  
PKAc

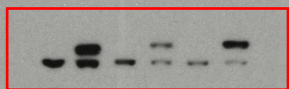

Handwritten notes in the top right corner, possibly indicating sample IDs or experimental conditions.

Handwritten note '722' near a band.

Handwritten note '1500155' near a band.

Handwritten note '1500155' near a band.

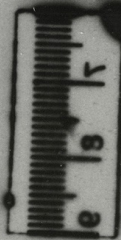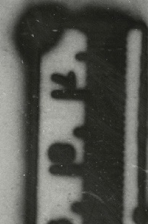



3xFLAG-PRKACA

639V  
+  
+  
+  
Dox

Actin

PhA

17W 97 400

12/6/22



3xFLAG-PRKACA

639V  
Colo741  
ML1

Dox

per nail

PKA R1a

۱۲۷۹۶۲۹

672 666 m. 1

Vanda

21/6/72



Supplement: fig1-data3 [file 1D mark up.pdf › 1D left panel/1D mark up.pdf]
