# Supplementary material for: Oncogenic PKA signaling increases c-MYC protein expression through multiple targetable mechanisms
Source: eLife journal article supplement (doi:10.7554/elife.69521), 2023-01-24
Supplement: fig5-figsupp2-data3 [file Figure S3C.xlsx]

## Sheet: Figure S2C
Time (mins)	DMSO	FSK/IBMX 30'	FSK/IBMX 2h
0	403264	475924	453382
30	174738	219379	191793
60	88502	47439	87270
90	30000	21551	17550
120	0	0	0
