# Supplementary material for: Oncogenic PKA signaling increases c-MYC protein expression through multiple targetable mechanisms
Source: eLife journal article supplement (doi:10.7554/elife.69521), 2023-01-24

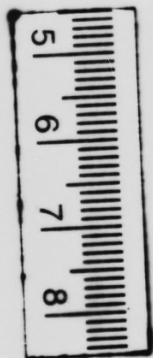

8/11/22  
Furke  
nmr

FLX1  
PRKAR1A<sup>G325D</sup>

AA1  
Dox  
FLX1  
FSH  
20 min

- + Dox

70%

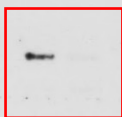

α4β

pelF4B  
S422

FLX1

FLX1  
myc

FLX1  
T55A

+myc

cok6

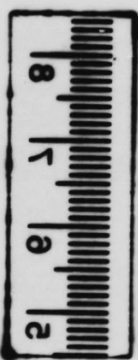

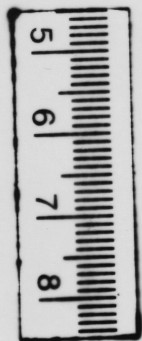

mm

PLX1  
AM  
PLX1  
1/i  
30' 120'

FLX1

PRKAR1A<sup>G325D</sup>

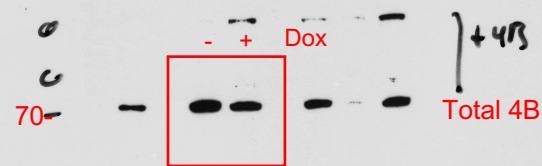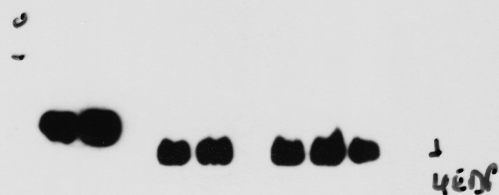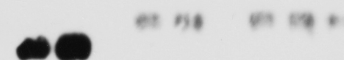

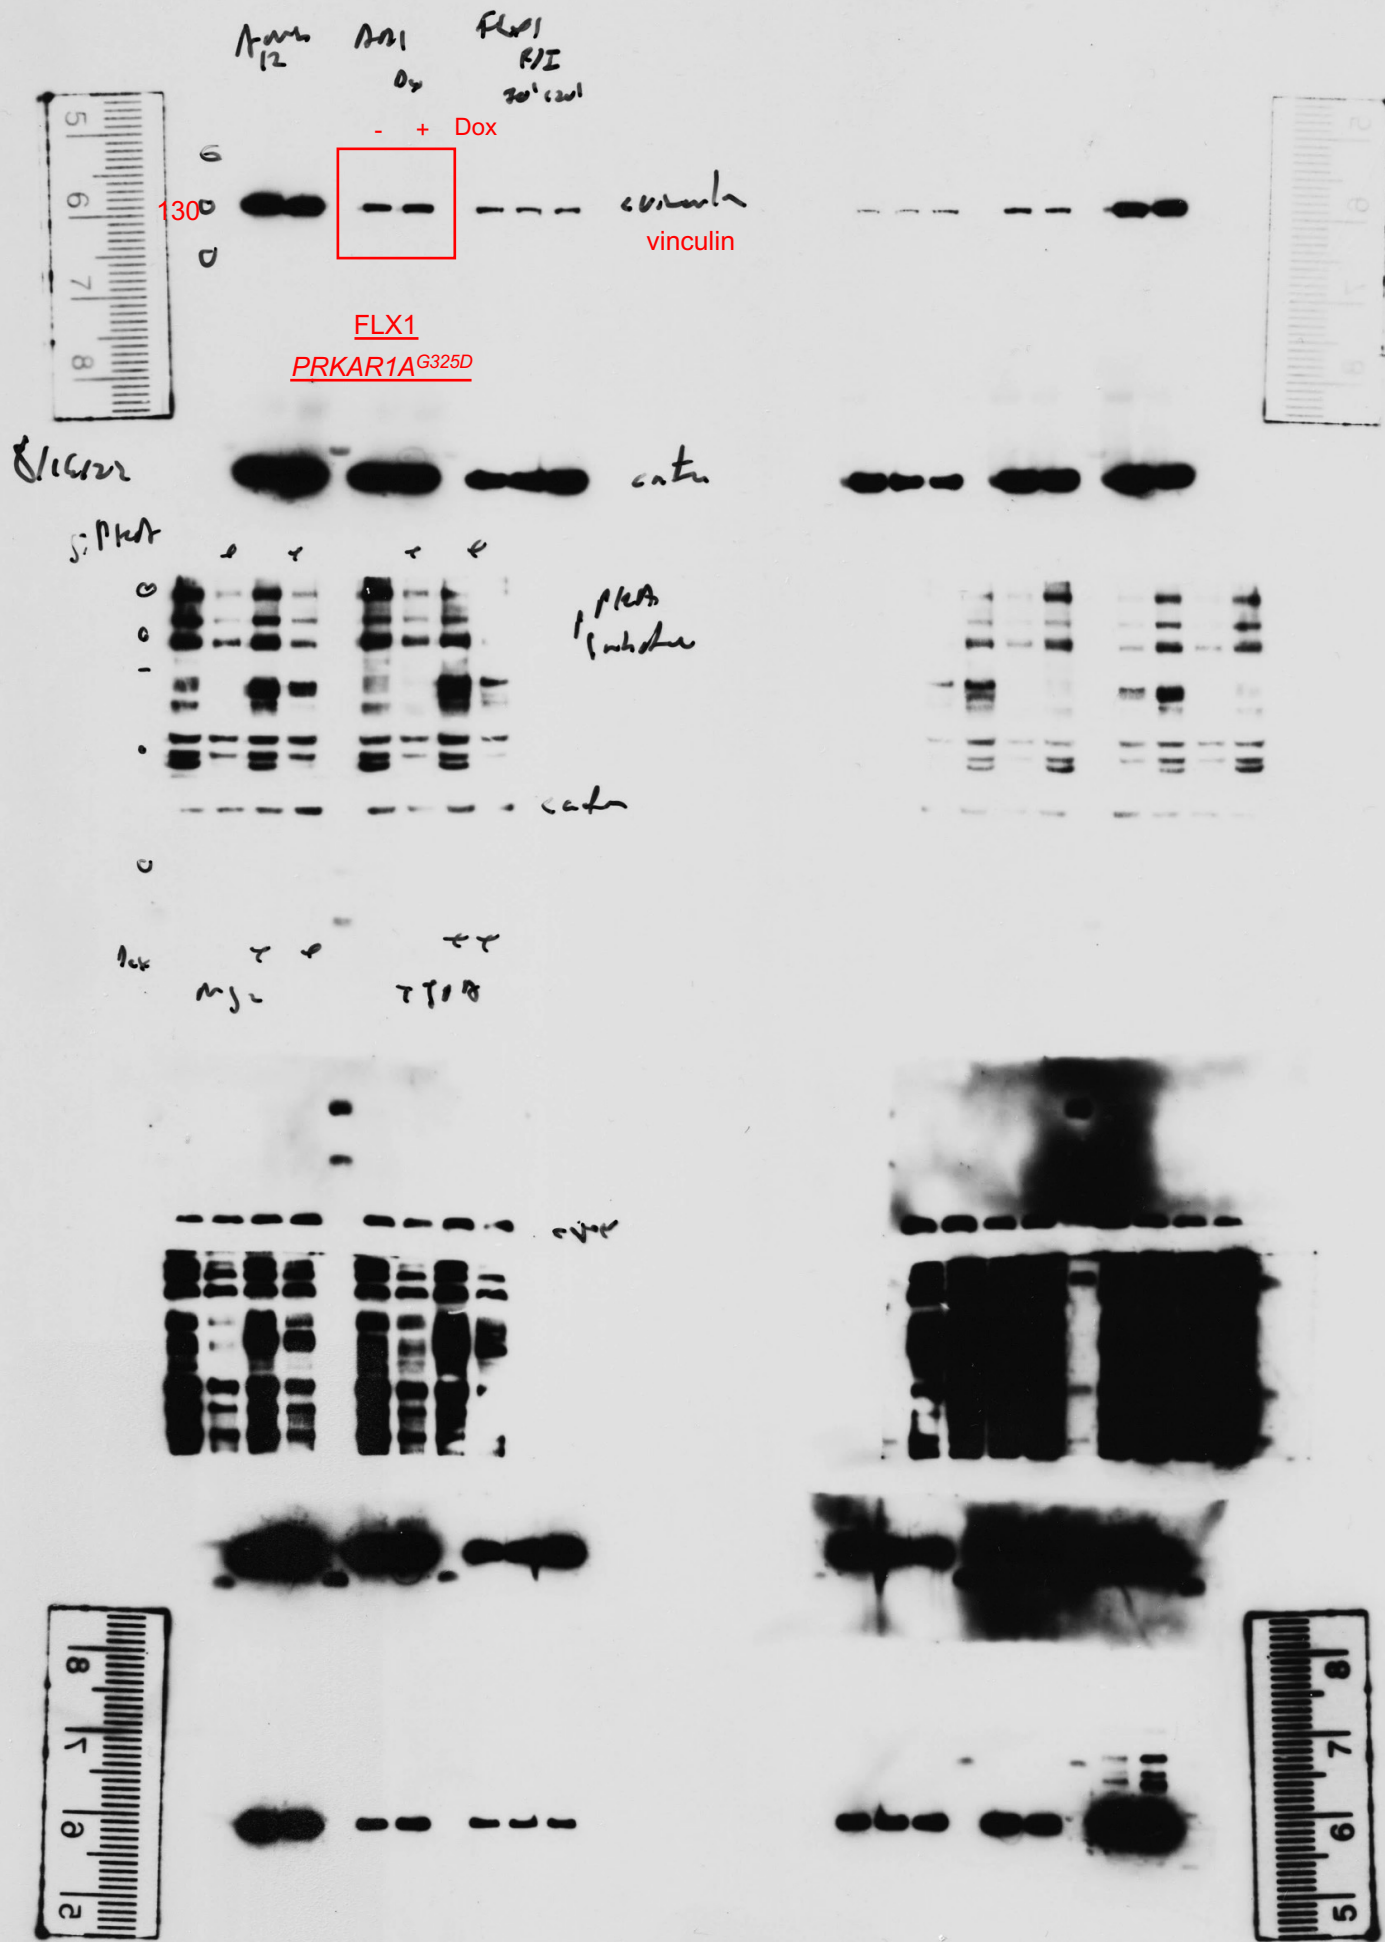

Supplement: fig6-data3 [file elife-69521-fig6-data3-v2.zip]
