# Supplementary material for: Oncogenic PKA signaling increases c-MYC protein expression through multiple targetable mechanisms
Source: eLife journal article supplement (doi:10.7554/elife.69521), 2023-01-24

0 20 100 500

1201  
mz

2Lx1  
755A

50-

+ Hz

col 6

8/11/22

7-10-11  
11-11-11

ARI  
Day

200  
 250  
 200

ср 43

6

101

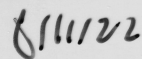

247 2000000  
 0  
 0

Ladder from  
endogenous  
MYC

FLX1 Tet-on  
3xF-MYC+dox  
0 20 100 500 nM Zotatifin

nsc

T8113

nsc

140

445



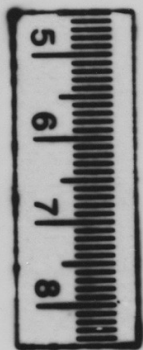

130

FLX1 Tet-on  
3xFLN-MYC+dox  
0 20 100 500 nM Zotatiffin

Vinculin

Vinculin

FLX1

FLX1

FLX1

FLX1

FLX1

FLX1

FLX1

FLX1

FLX1

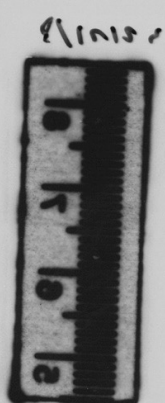

Supplement: fig7-data3 [file elife-69521-fig7-data3-v2.zip]
