# Supplementary material for: Oncogenic PKA signaling increases c-MYC protein expression through multiple targetable mechanisms
Source: eLife journal article supplement (doi:10.7554/elife.69521), 2023-01-24
Supplement: fig7-figsupp1-data1 [file S4a markup.pdf › S4A/S4a markup.pdf]

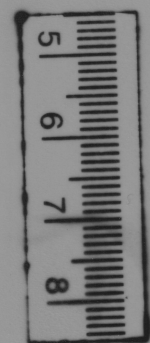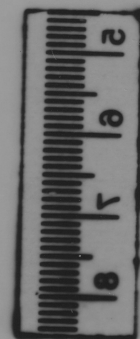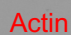

FLX1 Tet-on  
3xF-MYC

|   |   |   |   |          |
|---|---|---|---|----------|
| + | - | + | - | siNTC    |
| - | + | - | + | siPRKACA |
| - | + | + | + | Dox      |

35-

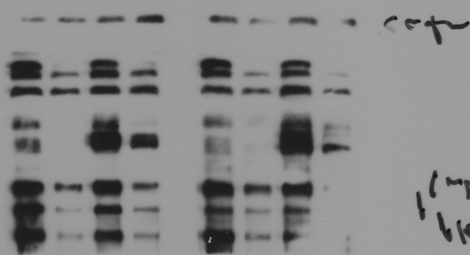

81055

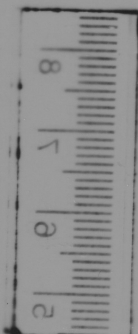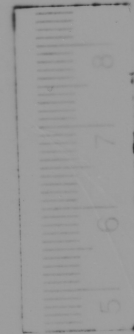

15  
Vow

Da  
Voi

30, cm  
KI  
km

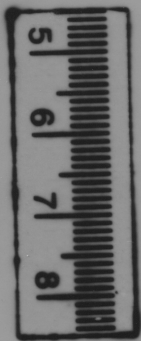

12hr (      FLK Myc      TPA

0: 20 hr after

Visual

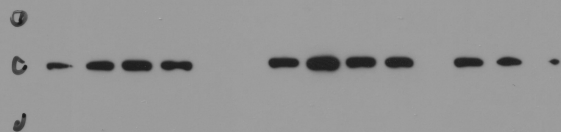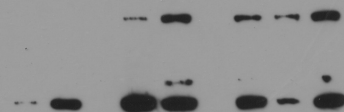

FLX1 Tet-on  
3xFLAG-MYC

|   |   |   |   |          |
|---|---|---|---|----------|
| + | - | + | - | siNTC    |
| - | + | - | + | siPRKACA |
| - | - | + | + | Dox      |

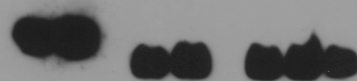

50-  
DNAJ-PKAc

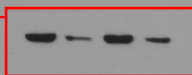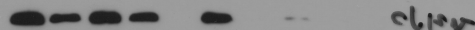

clear

1 2 3 4  
5 6 7 8  
9 10 11 12

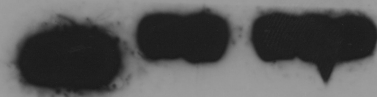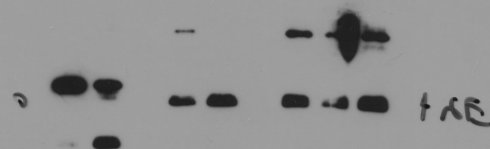

1x10

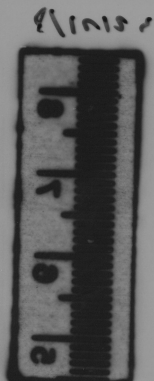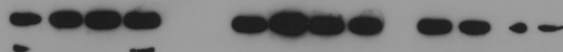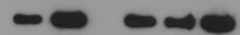

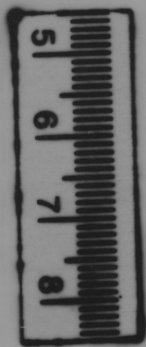

8/16/22

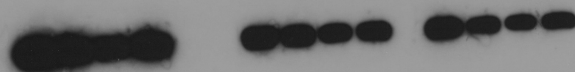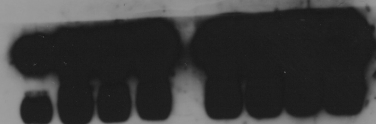

FLX1 Tet-on  
3xF-MYC

+ + + - siNTC  
- + + + siPRKAG4  
- - + + Dox

TTC

Day

Protein

250

250

250

-FL-c-MYC (long) 70  
-c-MYC 50

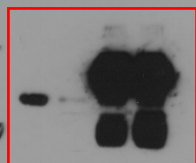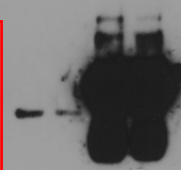

FL-c-MYC  
c-MYC

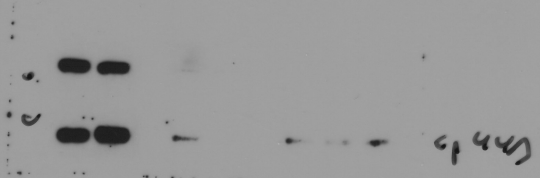

6.44

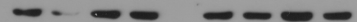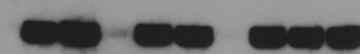

1.45

FLX1  
12  
AD1  
0<sub>2</sub>  
FLX1  
R/I  
30' (20)

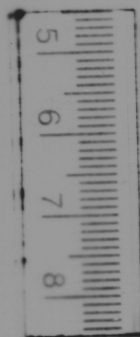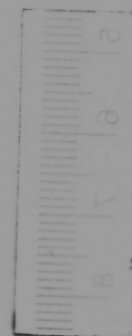

6  
0  
0  
0  
control

FLX1 Tet-on  
3xFLAG-MYC

+ - + - siNTC  
- + - + siPRKACA  
- - + + Dox

8/10/08

control

-pPKA  
substrate

siPRKACA

130  
100

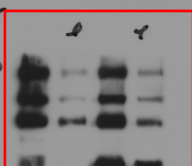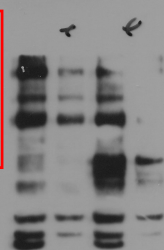

pPKA  
substrate

control

10/10/08

AD1  
AD1

AD1  
AD1

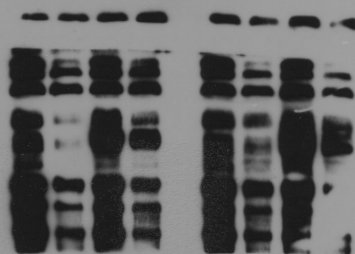

control

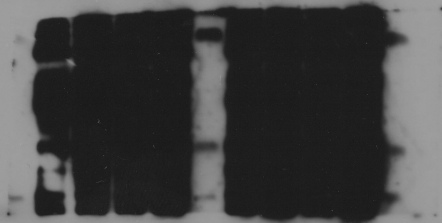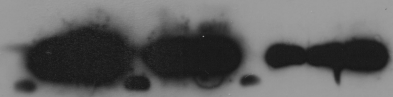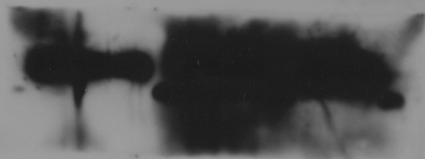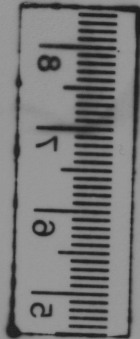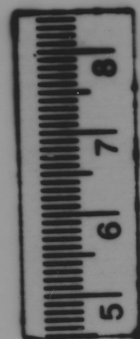

6  
0  
0  
0

6  
0  
0  
0

8/17/22

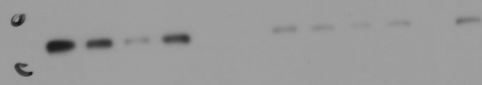

H2A

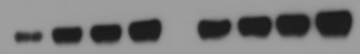

H2B

FLX1 Tet-on  
3xFLAG-MYC

|   |   |   |   |          |
|---|---|---|---|----------|
| + | - | + | - | siNTC    |
| - | + | - | + | siPRKACA |
| - | - | + | + | Dox      |

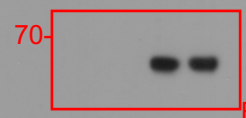

FL-c-MYC (short)

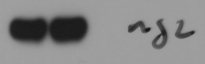

~82
