# Supplementary material for: Oncogenic PKA signaling increases c-MYC protein expression through multiple targetable mechanisms
Source: eLife journal article supplement (doi:10.7554/elife.69521), 2023-01-24

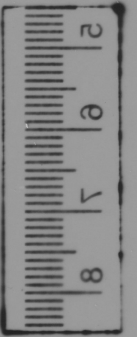

21/12/22

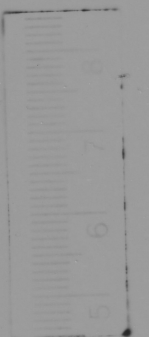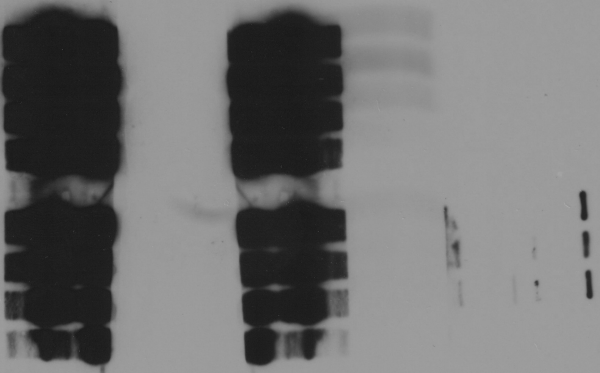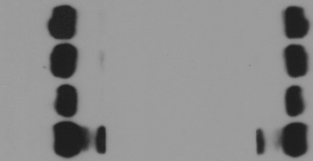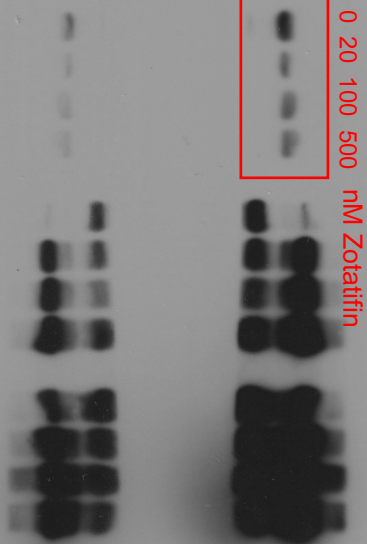

COL0741  
c-MYC  
70k  
50k  
0 20 100 500 nM Zolatifin

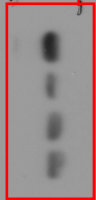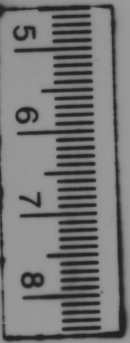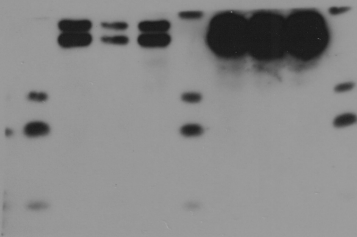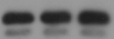

Colo

Colo myc

Colo-Tet-on

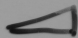

2.1

COLO741 COLO741 Tet-on  
3xF-MYC+dox

0 20 100 500 0 20 100 500 nM Zotatiffin

70

50

FL-c-MYC

FL-c-MYC

35

Actin

Actin

Actin

9/12/12

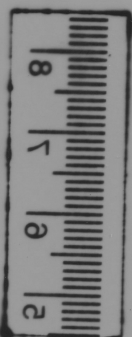

Supplement: fig7-figsupp1-data2 [file S4b markup.pdf › S4B/S4b markup.pdf]
