# Supplementary material for: Oncogenic PKA signaling increases c-MYC protein expression through multiple targetable mechanisms
Source: eLife. 2023 Jan 24;12:e69521. doi: 10.7554/eLife.69521 (PMC9925115; doi:10.7554/eLife.69521)
Supplement: Figure 1—source data 2. [file elife-69521-fig1-data2.xlsx]

## Sheet: Sheet1
	PRKACA Activation	PRKACA Amplification	PRKAR1A Inactivation	PRKAR1A Deletion	DNAJ-PKAc Fusion
Fibrolamellar Carcinoma					79
Adrenocortical Carcinoma	0	2.6	5.3	4
Bladder	0.3	0.3	0	0
Breast	0.4	1.6	0.3	0
Cervical	0.7	1.8	0	0.4
Colorectal	0.2	0	0	0
Endometrial	2.3	3.2	0.7	0
Esophagogastric	0.9	0.9	0	0
Germ Cell Tumor	0	0	0	0
Glioma	0	1.1	0	0
Head and Neck	0.8	0.8	0.2	0
Hepatobilliary	0	0	0	0
Leukemia	0	0	0	0
Melanoma	1.8	0.2	0.7	0.5
Mesothelioma	0	1.2	0	0
Misc. Neuroepithelial Tumor	0	0	0	0
Nerve Sheath Tumor	0	11.1	0	0
Non-Hodgkin Lymphoma	2.7	0	0	0
Non-Small Cell Luncg Cancer	0.4	0.7	0.2	0
Ovarian	0.6	11.3	0	0.6
Pancreatic	0	0	0	0
pheochromocytoma	0	0	0	0
Prostate	0.4	0.4	0	0
Renal Cell	0.4	0	0	0
Soft Tissue Sarcoma	0.5	3.2	0	0
Thymic Tumor	0	0	0	0
Thyroid	0	0	0	0
