# Supplementary material for: Oncogenic PKA signaling increases c-MYC protein expression through multiple targetable mechanisms
Source: eLife. 2023 Jan 24;12:e69521. doi: 10.7554/eLife.69521 (PMC9925115; doi:10.7554/eLife.69521)
Supplement: Figure 3—figure supplement 1—source data 1. [file elife-69521-fig3-figsupp1-data1.xlsx]

## Sheet: Fig3-S1A.1
Elapsed	NTC2-1						NTC2-2						PRKACA si1						PRKACA si2						PRKACA si3						PRKACA si17
36	1	1	1	1	1	1	1	1	1	1	1	1	1	1	1	1	1	1	1	1	1	1	1	1	1	1	1	1	1	1	1	1	1	1	1	1
38	1.0029	1.00163	1.00796	1.00493	1.01899	0.999313	1.00853	1.01371	1.00728	0.995604	1.01788	1.00613	0.987536	0.997402	1.01519	1.01094	0.993504	0.99668	1.01006	1.0028	1.00026	1.00661	1.018	1.00277	0.989887	1.00847	1.01698	1.00375	1.00077	1.01492	1.0136	1.01261	0.999796	1.0045	1.01956	1.00682
40	1.02817	0.998159	1.00529	1.00599	1.01007	0.999257	1.01934	1.03161	1.02854	1.01414	1.01415	1.01497	1.00087	1.01745	1.01088	1.03311	1.02073	1.01693	1.03078	1.02305	1.02379	1.02138	1.02175	1.00968	1.00419	1.00467	1.00378	1.01863	0.998757	1.02131	1.02042	1.01597	1.01949	1.02225	1.02887	1.01156
42	1.04532	1.04191	1.02338	1.01875	1.02205	1.00732	1.02862	1.04611	1.0459	1.04238	1.02636	1.01892	1.01675	1.01308	1.02955	1.03354	1.00615	1.01017	1.02719	1.02411	1.01331	1.03008	1.01454	1.01238	1.00995	1.00934	1.02395	1.00875	1.01383	1.02311	1.02979	1.02065	1.04575	1.01668	1.0459	1.02605
44	1.05564	1.03683	1.02841	1.04003	1.0168	1.0199	1.03518	1.04	1.04161	1.03831	1.03372	1.04345	1.02625	1.0156	1.00729	1.02401	1.00937	1.02825	1.02097	1.02653	1.01635	1.0301	1.05365	1.0123	0.999653	1.0059	1.01587	1.00068	1.02235	1.02112	1.02979	1.02637	1.03703	1.02737	1.04118	1.01878
46	1.0474	1.0498	1.03496	1.06141	1.02237	1.02354	1.03957	1.06446	1.05352	1.05281	1.04752	1.05831	1.03505	1.01271	1.01955	1.03879	1.01664	1.02922	1.02533	1.04109	1.03216	1.03511	1.04386	1.03381	0.984967	1.00553	1.02495	1.0113	1.02669	1.02205	1.04742	1.02799	1.04411	1.02752	1.05619	1.03918
48	1.07026	1.06716	1.05961	1.04841	1.01885	1.03242	1.03304	1.06104	1.06826	1.05652	1.06194	1.0904	1.03559	1.01867	1.02327	1.01994	1.05776	1.02504	1.01821	1.04774	1.026	1.02998	1.0623	1.02728	1.0085	0.998323	1.01693	1.01235	1.02054	1.03813	1.05678	1.03435	1.06094	1.03956	1.07052	1.04916
50	1.07732	1.06541	1.05601	1.05518	1.04334	1.03264	1.04579	1.09121	1.09472	1.0742	1.0931	1.07987	1.03328	1.01995	1.01738	1.02521	1.02849	1.0383	1.03887	1.04147	1.0242	1.03074	1.06699	1.05088	0.983504	0.999133	1.03161	1.0126	1.01862	1.03316	1.07397	1.05248	1.06626	1.05859	1.07916	1.05757
52	1.10327	1.07797	1.07358	1.06874	1.04402	1.04416	1.04972	1.11871	1.11444	1.099	1.08845	1.10024	1.05072	1.03124	1.01333	1.04059	1.04588	1.0233	1.05103	1.03443	1.03854	1.03772	1.07503	1.04582	0.982192	0.987148	1.04214	1.00002	1.01584	1.04083	1.08449	1.04572	1.07311	1.06854	1.0752	1.07474
54	1.11223	1.11116	1.0962	1.08301	1.05315	1.03577	1.06978	1.1323	1.15158	1.10675	1.10382	1.09055	1.05541	1.0364	1.02178	1.04149	1.03307	1.00258	1.05281	1.0434	1.04134	1.02646	1.08739	1.04552	0.99057	0.986437	1.03621	0.992471	1.01853	1.04075	1.09941	1.06709	1.0797	1.07154	1.08126	1.07105
56	1.12987	1.11993	1.09971	1.09854	1.06176	1.04573	1.06633	1.13736	1.15684	1.11339	1.12976	1.13211	1.04392	1.02301	1.02673	1.03548	1.05609	1.01116	1.07644	1.03178	1.04162	1.03748	1.07751	1.063	0.978279	0.973058	1.04297	0.992764	1.01755	1.041	1.10736	1.06217	1.09183	1.07656	1.07215	1.07279
58	1.14996	1.14697	1.1201	1.12063	1.06966	1.05847	1.07259	1.15418	1.16974	1.13215	1.14235	1.12883	1.0424	1.02639	1.02734	1.04184	1.05191	1.03114	1.0659	1.04618	1.05583	1.01531	1.0888	1.06724	0.978355	0.979773	1.02325	0.998762	1.02981	1.03591	1.09675	1.05662	1.10725	1.07816	1.07904	1.07474
60	1.16059	1.15718	1.13563	1.12654	1.08618	1.07024	1.07658	1.17841	1.18367	1.15817	1.16814	1.15798	1.02827	1.03437	1.00326	1.04987	1.03279	1.00862	1.06671	1.04896	1.02644	1.02257	1.09942	1.08333	0.968535	0.980491	1.03596	0.997062	1.02256	1.04664	1.098	1.08386	1.11007	1.08936	1.07805	1.07847
62	1.17436	1.17657	1.11913	1.14865	1.09151	1.07753	1.08455	1.20438	1.19397	1.14524	1.17377	1.16928	1.04669	1.01492	1.02811	1.04831	1.031	1.01611	1.06518	1.04865	1.04998	1.02156	1.08957	1.08489	0.968524	0.987867	1.03569	0.996025	1.0127	1.04906	1.10634	1.0888	1.1094	1.0927	1.06789	1.07611
64	1.18762	1.17911	1.1497	1.12725	1.0938	1.07404	1.09727	1.20925	1.20014	1.1752	1.1939	1.16577	1.04464	1.0172	0.988837	0.987382	1.01652	0.964405	1.0664	1.03549	1.04949	1.00479	1.0712	1.05485	0.942565	0.933066	0.996405	0.968658	0.990873	1.02934	1.10373	1.07582	1.11015	1.07849	1.05847	1.04753
66	1.20426	1.22325	1.17615	1.16846	1.11805	1.09666	1.1203	1.22469	1.23124	1.19848	1.19613	1.19397	1.0687	1.02304	1.00755	1.04727	1.02047	1.00617	1.08561	1.04523	1.06104	1.03675	1.08282	1.08135	0.974627	0.976634	1.00024	0.99537	1.00107	1.03895	1.11146	1.09387	1.13285	1.10304	1.07721	1.05549
68	1.2227	1.22886	1.18436	1.19985	1.12599	1.08535	1.1205	1.24754	1.25135	1.21577	1.25482	1.20814	1.05344	1.02762	0.991091	1.0435	1.04735	1.00388	1.09303	1.06499	1.05247	1.02991	1.0902	1.08947	0.936842	0.982077	1.00167	1.00108	0.990174	1.03454	1.14083	1.09278	1.12149	1.11464	1.07401	1.06946
70	1.24003	1.25018	1.21833	1.21864	1.13661	1.10344	1.1138	1.23619	1.26209	1.22533	1.27176	1.22133	1.05843	1.02329	1.00935	1.05268	1.02935	1.00769	1.07096	1.05924	1.04988	1.01737	1.09061	1.08505	0.924302	0.981218	0.985988	0.983483	0.998846	1.03659	1.15409	1.08262	1.10435	1.1166	1.08837	1.03303
72	1.25361	1.28079	1.21671	1.2394	1.15693	1.1185	1.11785	1.26942	1.27328	1.24788	1.24094	1.2294	1.07361	1.03457	0.990939	1.04835	1.02444	1.00499	1.07159	1.07109	1.034	1.02168	1.08896	1.08179	0.91148	0.970201	1.00426	0.976478	0.997801	1.03863	1.14993	1.07959	1.10628	1.10695	1.08153	1.05621
74	1.27906	1.26858	1.23257	1.24143	1.15137	1.1273	1.12244	1.29436	1.27155	1.24855	1.26877	1.25852	1.05743	1.05406	0.985992	1.05466	1.04226	1.0118	1.08378	1.07398	1.04571	1.02151	1.09566	1.09007	0.913593	0.95084	0.991559	0.986312	0.991672	1.02997	1.15547	1.0748	1.10479	1.10485	1.06985	1.07625
76	1.27724	1.30907	1.23998	1.2716	1.18074	1.12601	1.15116	1.30643	1.3036	1.28664	1.30737	1.24062	1.04848	1.01557	0.99976	1.07302	1.06364	0.98509	1.08426	1.08452	1.05609	1.03117	1.09092	1.1015	0.918752	0.967045	0.991514	0.986654	0.975074	1.01172	1.15481	1.08375	1.11227	1.10884	1.08477	1.08851
78	1.28553	1.31649	1.26373	1.28312	1.18994	1.15539	1.15108	1.31805	1.30792	1.3161	1.32043	1.28379	1.06072	1.05531	0.98956	1.05202	1.078	0.99239	1.07847	1.07576	1.04903	1.01317	1.07374	1.09866	0.926979	0.953714	0.987651	0.982366	0.986077	1.01761	1.17132	1.09161	1.13632	1.13412	1.06803	1.05839
80	1.3233	1.33069	1.27136	1.27215	1.18633	1.162	1.16283	1.34779	1.33921	1.31651	1.33707	1.30983	1.09726	1.04727	1.01165	1.0273	1.06558	0.995649	1.08723	1.05856	1.0144	1.01297	1.08346	1.09199	0.929168	0.959108	0.991371	0.981521	0.976939	1.03895	1.16798	1.09127	1.11922	1.11535	1.05024	1.04322
82	1.34067	1.35051	1.28579	1.28012	1.1856	1.17207	1.16809	1.37942	1.35388	1.32694	1.35139	1.33621	1.09445	1.04686	1.01742	1.06294	1.02507	0.963189	1.07918	1.04756	1.04272	0.997406	1.08189	1.10158	0.94109	0.97286	1.00779	0.969332	0.974075	1.0191	1.16324	1.07257	1.13907	1.11953	1.04516	1.04361
84	1.34478	1.38189	1.29955	1.31487	1.22376	1.1972	1.17539	1.38557	1.33605	1.32095	1.36241	1.3346	1.07029	1.05581	0.994813	1.04129	1.04464	0.972283	1.10596	1.0289	1.01769	0.997138	1.08327	1.10079	0.944429	0.951418	0.978736	0.975542	0.987764	1.03178	1.15923	1.07426	1.13371	1.10864	1.06247	1.05949
86	1.37245	1.40884	1.30057	1.31655	1.21512	1.18701	1.19369	1.36798	1.35656	1.34792	1.37166	1.34817	1.08338	1.05625	1.01679	1.07666	1.05825	0.990844	1.07783	1.04196	1.04777	1.01835	1.08821	1.10137	0.925148	0.953846	1.00934	0.9799	1.00046	1.03064	1.17531	1.08927	1.11634	1.13028	1.06673	1.07809
88	1.39281	1.4185	1.35297	1.34404	1.24922	1.23982	1.20308	1.40788	1.39838	1.39297	1.38699	1.34734	1.06735	1.06323	1.03301	1.05792	1.04709	0.947721	1.07752	1.05228	1.03133	1.00506	1.09539	1.10693	0.901475	0.93466	0.9787	0.976417	0.983212	1.0311	1.17149	1.07675	1.11933	1.13288	1.08512	1.08311
90	1.41198	1.43065	1.36532	1.36039	1.24471	1.24439	1.20455	1.39222	1.37655	1.40481	1.39876	1.37293	1.09445	1.06354	1.03793	1.08412	1.04041	0.963725	1.09525	1.03451	1.02621	1.00466	1.0687	1.12486	0.921386	0.933975	0.976992	0.978814	0.988908	1.01911	1.18478	1.07766	1.13219	1.12985	1.06188	1.07545
94	1.46293	1.45109	1.38652	1.37593	1.24243	1.26801	1.2312	1.44046	1.47954	1.43179	1.42813	1.38247	1.14004	1.0357	1.0176	1.07054	1.06232	0.94964	1.13473	1.04071	1.09108	1.01206	1.1108	1.07882	0.958899	0.979946	0.981919	0.970671	0.978205	1.03491	1.2039	1.08182	1.12172	1.1774	1.11416	1.10442
96	1.45845	1.44241	1.36699	1.37668	1.24881	1.26782	1.23553	1.44259	1.48281	1.39609	1.46013	1.37267	1.09838	1.0755	1.00565	1.08264	1.00939	0.958012	1.10498	1.06377	1.07374	1.01058	1.08361	1.08443	0.958141	0.97452	0.971448	0.963917	0.965114	1.02719	1.19774	1.08286	1.10715	1.16816	1.07245	1.06075
98	1.47154	1.46962	1.37675	1.37836	1.29244	1.30363	1.25835	1.49525	1.48601	1.51246	1.43325	1.43027	1.15968	1.07708	1.03426	1.06445	1.10596	0.990163	1.10932	1.05509	1.08427	1.04232	1.11756	1.10089	0.985454	0.972191	1.03078	1.01181	0.992172	1.06491	1.18939	1.10648	1.11555	1.15131	1.0928	1.10171
100	1.46387	1.49685	1.40032	1.39729	1.28533	1.30413	1.26376	1.52846	1.5304	1.47852	1.44508	1.45706	1.15307	1.07671	1.05917	1.05827	1.10767	0.986616	1.12865	1.07968	1.08216	1.04076	1.12775	1.1064	0.969186	0.966301	1.05556	1.00187	0.99245	1.02872	1.20215	1.11718	1.11697	1.16732	1.1054	1.08913
104	1.50379	1.50924	1.40326	1.41281	1.31442	1.32497	1.28558	1.52446	1.55206	1.4752	1.48805	1.50292	1.12737	1.11347	1.08373	1.06485	1.09596	0.993566	1.11253	1.03432	1.09389	1.05933	1.09629	1.09643	0.952721	0.94211	1.04039	0.986826	0.98319	1.00398	1.17499	1.10199	1.12069	1.13857	1.10412	1.08824
106	1.51109	1.49667	1.40528	1.425	1.30449	1.34385	1.287	1.54827	1.56451	1.52326	1.51183	1.51087	1.14649	1.14208	1.05549	1.03695	1.07324	0.941266	1.10529	1.03256	1.05657	1.04025	1.08683	1.09353	0.9421	0.944596	1.02556	0.977012	0.972132	1.01221	1.17977	1.09731	1.10196	1.15135	1.08387	1.08358
108	1.53993	1.51309	1.44109	1.44806	1.3013	1.35869	1.27012	1.57199	1.56846	1.49886	1.5254	1.52123	1.15641	1.13992	1.05761	1.05214	1.12089	1.01054	1.102	1.0213	1.06897	1.04209	1.09615	1.08579	0.960861	0.950476	1.02893	0.9782	0.973918	1.01111	1.19097	1.07807	1.09905	1.13955	1.09578	1.05857
110	1.54691	1.53048	1.41628	1.44092	1.32519	1.38058	1.28618	1.57085	1.57261	1.58662	1.55119	1.54319	1.14908	1.13842	1.05227	1.06621	1.10348	1.00604	1.10216	1.01752	1.08152	1.01271	1.07981	1.06048	0.940972	0.923362	1.01299	0.964108	0.961594	0.986462	1.17771	1.08737	1.10804	1.15126	1.12356	1.09951
112	1.55622	1.54514	1.41372	1.43788	1.33085	1.35083	1.29861	1.59141	1.58506	1.57141	1.57007	1.5465	1.18032	1.15328	1.05698	1.08352	1.15798	1.01169	1.09787	1.01527	1.09094	1.04732	1.0945	1.0743	0.916866	0.919942	1.01156	0.986221	0.970699	0.998092	1.18116	1.08964	1.10377	1.15021	1.11847	1.10365
114	1.57528	1.59096	1.43183	1.47594	1.31706	1.38485	1.30713	1.57892	1.58868	1.59529	1.57643	1.57264	1.13682	1.11752	1.07534	1.04686	1.14419	0.991978	1.09548	1.03798	1.06378	1.0271	1.06787	1.07419	0.939194	0.936295	1.03915	0.972694	0.952279	0.994366	1.18232	1.11656	1.12687	1.13679	1.12413	1.1332
116	1.57966	1.6025	1.39454	1.48635	1.33885	1.37896	1.30621	1.62111	1.59707	1.55548	1.56916	1.5732	1.14392	1.15357	1.11805	1.05473	1.10606	0.992184	1.07013	1.02348	1.07448	1.01572	1.0866	1.07036	0.912791	0.935155	1.02713	0.966614	0.958108	1.01318	1.19293	1.09328	1.09981	1.13666	1.12885	1.12762
118	1.58665	1.6176	1.41962	1.48429	1.33743	1.38164	1.31305	1.63891	1.58526	1.62127	1.5897	1.58362	1.15487	1.14389	1.10281	1.0604	1.08957	1.02054	1.07109	1.00983	1.06693	1.03215	1.08837	1.10001	0.925017	0.938592	1.02797	0.955915	0.970677	0.999626	1.19968	1.09694	1.09439	1.13265	1.10622	1.10742
120	1.61339	1.62747	1.43052	1.4682	1.33934	1.39804	1.32916	1.6426	1.63419	1.61621	1.63737	1.62008	1.15006	1.12053	1.09126	1.06725	1.1226	0.988678	1.07387	1.03973	1.05526	1.01126	1.07361	1.06769	0.924064	0.953154	1.01959	0.968295	0.96326	1.01623	1.19694	1.09736	1.125	1.15388	1.10551	1.10015
122	1.59949	1.65167	1.44402	1.49714	1.34189	1.40392	1.33404	1.66389	1.64006	1.62541	1.64883	1.61676	1.16337	1.14339	1.07473	1.0605	1.13004	0.980656	1.08443	1.03693	1.07612	1.02106	1.09925	1.05153	0.92001	0.950353	1.01469	0.980776	0.973386	0.987532	1.19863	1.1085	1.12278	1.14415	1.09026	1.10202
124	1.59811	1.64444	1.49042	1.50238	1.34602	1.41796	1.34772	1.67923	1.58304	1.64714	1.66512	1.62444	1.15502	1.1657	1.10382	1.05082	1.14012	1.00862	1.09044	1.01801	1.05745	1.03418	1.06422	1.05338	0.920259	0.939385	1.03513	0.979216	0.974729	1.00043	1.21216	1.09428	1.11014	1.14756	1.11096	1.12052
126	1.61553	1.67722	1.47826	1.50713	1.40927	1.42233	1.36094	1.69398	1.66887	1.67739	1.69165	1.62911	1.18488	1.17338	1.09767	1.09827	1.08727	1.03871	1.07824	1.01327	1.04986	1.0325	1.07199	1.04824	0.924356	0.933669	1.05854	0.985789	0.985655	0.995387	1.2241	1.10906	1.11092	1.16197	1.10619	1.12228
128	1.64369	1.66835	1.50821	1.49398	1.40155	1.423	1.36618	1.70494	1.6576	1.67418	1.69792	1.62845	1.20151	1.16934	1.12011	1.09887	1.1538	1.01689	1.07882	1.02817	1.05623	1.03962	1.07	1.04714	0.924421	0.935271	1.05717	0.993035	0.975928	0.999041	1.21124	1.11758	1.11304	1.15561	1.09393	1.09785
130	1.67398	1.69832	1.46763	1.4851	1.41758	1.41684	1.36906	1.72349	1.68536	1.66572	1.70511	1.67821	1.19906	1.2226	1.1254	1.10928	1.18692	1.06624	1.05167	1.02141	1.08858	1.04718	1.08052	1.06407	0.923012	0.929134	1.04956	0.970459	0.959607	1.01567	1.22372	1.1047	1.12129	1.15085	1.11386	1.10747
132	1.67056	1.65806	1.52595	1.49531	1.4099	1.41968	1.4006	1.7203	1.69305	1.70895	1.72194	1.65211	1.21339	1.22755	1.10855	1.09495	1.15547	1.03553	1.10382	1.03797	1.07816	1.03879	1.0872	1.07626	0.948537	0.954837	1.08217	0.992351	0.970976	1.01636	1.24685	1.11489	1.10566	1.14871	1.09892	1.13238
134	1.65255	1.67745	1.53042	1.50329	1.41071	1.44079	1.3676	1.67716	1.66096	1.75381	1.71474	1.68412	1.20736	1.17064	1.10435	1.11212	1.1356	1.06727	1.10044	1.02547	1.05919	1.0297	1.07208	1.07278	0.934534	0.945588	1.05397	0.968818	0.978016	1.01987	1.23117	1.11974	1.14383	1.14115	1.11424	1.13146
136	1.68654	1.66847	1.55718	1.54538	1.43056	1.42232	1.38278	1.68045	1.73175	1.7501	1.74131	1.68265	1.22738	1.18368	1.1281	1.09735	1.15189	1.06049	1.0893	1.00582	1.09349	1.04725	1.08956	1.06858	0.947171	0.945216	1.04814	0.988406	0.987532	1.03048	1.24086	1.1195	1.13644	1.17821	1.14626	1.13642
138	1.7158	1.69658	1.54663	1.51708	1.43024	1.45475	1.38675	1.69483	1.75584	1.76449	1.75583	1.6846	1.18904	1.14006	1.10916	1.06809	1.15533	1.02005	1.06246	1.01263	1.0741	1.03468	1.06979	1.04346	0.956948	0.952501	1.04917	0.969111	0.97041	1.0051	1.28678	1.13506	1.14634	1.18405	1.13011	1.12213
140	1.7182	1.68354	1.55907	1.55997	1.42121	1.45456	1.38415	1.73682	1.76934	1.76223	1.76323	1.73178	1.20754	1.20892	1.12214	1.12407	1.17897	1.06663	1.08121	1.01979	1.08976	1.07387	1.07218	1.06051	0.941503	0.960768	1.07239	0.983383	0.981402	1.01404	1.25105	1.12563	1.14114	1.17791	1.13552	1.15343
142	1.72627	1.69704	1.56604	1.53589	1.44702	1.46639	1.39732	1.78167	1.78519	1.7993	1.70137	1.72822	1.25552	1.2073	1.10108	1.09675	1.158	1.00681	1.05495	1.00542	1.04324	1.04012	1.05706	1.03271	0.942207	0.936774	1.06691	0.974677	0.983712	0.999213	1.28814	1.10466	1.1146	1.17188	1.1265	1.14527
144	1.71223	1.72906	1.58729	1.54796	1.46686	1.47479	1.40471	1.75843	1.75318	1.75958	1.81083	1.75185	1.20088	1.20191	1.11923	1.10252	1.16229	0.991812	1.06132	1.01218	1.04157	1.03666	1.07971	1.0385	0.946185	0.926186	1.05351	0.956277	0.992871	0.974297	1.27741	1.12921	1.15319	1.16409	1.15812	1.14891
146	1.71879	1.70444	1.5478	1.5619	1.48419	1.46428	1.41146	1.77887	1.78412	1.80115	1.79931	1.78199	1.21796	1.20365	1.15235	1.11033	1.20651	0.990946	1.0531	1.02096	1.06943	1.03996	1.0737	1.05958	0.942804	0.917414	1.06232	0.991163	0.990196	1.00779	1.26391	1.13996	1.13915	1.1939	1.17049	1.16863
148	1.77222	1.72344	1.57227	1.53989	1.48247	1.46744	1.40482	1.77306	1.79504	1.82702	1.78388	1.75897	1.22431	1.1726	1.15283	1.12246	1.15576	1.00565	1.05549	1.01682	1.06943	1.01301	1.06373	1.0663	0.965988	0.940268	1.05763	0.984007	0.969833	1.01144	1.28713	1.14256	1.12517	1.17384	1.17868	1.18915
150	1.78236	1.75181	1.61011	1.58392	1.46935	1.51265	1.42611	1.81791	1.80957	1.80735	1.74607	1.76916	1.25869	1.22883	1.1738	1.12964	1.16087	1.06315	1.05005	1.01637	1.04254	1.01895	1.0495	1.04208	0.94366	0.90567	1.06572	0.976438	0.974319	0.996174	1.27582	1.12848	1.14002	1.15469	1.19248	1.13187
152	1.78167	1.75524	1.57262	1.54417	1.49256	1.48612	1.43341	1.76347	1.81759	1.84102	1.81471	1.80356	1.24336	1.20752	1.15283	1.1485	1.17132	1.06296	1.02722	1.0202	1.04185	1.02039	1.07243	1.05355	0.943834	0.937625	1.05365	0.976065	0.978893	1.02694	1.28322	1.13617	1.14004	1.1998	1.20061	1.16738
154	1.77558	1.74814	1.60848	1.59963	1.48988	1.51951	1.41626	1.81129	1.83958	1.84091	1.80172	1.7993	1.28242	1.20642	1.19068	1.14695	1.19178	1.08604	1.05159	1.01259	1.03103	1.01596	1.07292	1.0532	0.955366	0.940186	1.04667	0.979639	0.974363	1.01274	1.27106	1.15584	1.15529	1.208	1.1771	1.16996
156	1.77518	1.75521	1.59303	1.58957	1.49969	1.51872	1.42965	1.82664	1.81483	1.85458	1.83192	1.7863	1.26746	1.24074	1.16511	1.13552	1.21694	1.03287	1.02887	1.00971	1.07769	1.02083	1.06009	1.06189	0.959095	0.928895	1.05807	0.985516	0.982235	1.02129	1.27851	1.14081	1.1146	1.19558	1.18428	1.15692
158	1.79301	1.78304	1.61399	1.58556	1.50927	1.49997	1.44309	1.85906	1.82734	1.8269	1.81261	1.8053	1.263	1.24982	1.14394	1.10805	1.22372	0.991772	1.03674	1.00416	1.05386	1.01533	1.05232	1.04889	0.94715	0.935221	1.07713	0.978421	0.969988	0.98627	1.29412	1.13558	1.1315	1.18525	1.19229	1.15585
160	1.80413	1.80611	1.60154	1.60612	1.50982	1.52171	1.45882	1.83952	1.88098	1.86621	1.8399	1.85191	1.27728	1.18795	1.20963	1.13604	1.15054	1.09965	1.02811	1.00833	1.05148	1.01275	1.04414	1.07698	0.947844	0.920388	1.05959	0.983172	0.97917	1.0404	1.33226	1.13976	1.1319	1.2159	1.17503	1.18733
162	1.79345	1.79076	1.60561	1.61695	1.51675	1.52513	1.46061	1.83477	1.85159	1.87089	1.86525	1.87728	1.26823	1.21722	1.19199	1.11448	1.16494	1.02537	1.02931	1.00338	1.08149	1.0252	1.05833	1.07443	0.947259	0.931001	1.07828	0.971425	0.973918	1.02404	1.31686	1.14743	1.12342	1.22153	1.19777	1.18644
164	1.84984	1.84016	1.64925	1.6198	1.53688	1.55526	1.46271	1.84749	1.90244	1.93511	1.89896	1.89117	1.28969	1.23235	1.23045	1.13657	1.20991	1.03644	1.04161	1.01509	1.08126	1.01127	1.05003	1.06406	0.937666	0.930753	1.06401	0.977555	0.97504	1.01386	1.34537	1.16366	1.15008	1.2328	1.19709	1.16704
166	1.87156	1.80494	1.65821	1.63947	1.56469	1.53246	1.45469	1.86223	1.94724	1.9044	1.9138	1.91768	1.26611	1.24935	1.26657	1.1556	1.17926	1.04813	1.06256	0.995038	1.07918	1.00708	1.05751	1.05595	0.949795	0.957795	1.06782	0.976066	0.978838	0.983454	1.31655	1.17691	1.15779	1.22501	1.23057	1.20235
168	1.89388	1.82334	1.66642	1.6606	1.54064	1.56972	1.4584	1.85321	1.93232	1.93519	1.88994	1.87756	1.31779	1.22994	1.21591	1.12134	1.17574	1.00881	1.01896	1.00406	1.04358	0.996102	1.05157	1.06634	0.941265	0.937336	1.06634	0.993599	0.988164	1.03567	1.3063	1.18668	1.13287	1.18525	1.21908	1.20238
172	1.88692	1.8099	1.66289	1.65691	1.56215	1.57892	1.46669	1.85236	1.91476	1.92043	1.91029	1.9298	1.30153	1.29068	1.21302	1.13932	1.22286	1.08989	1.03313	0.998478	1.03624	1.00049	1.05398	1.05984	0.956569	0.9601	1.09002	0.963172	0.976539	1.01211	1.32587	1.20547	1.19257	1.21309	1.20253	1.19858
174	1.88244	1.82314	1.64108	1.69186	1.55416	1.59657	1.46045	1.86055	1.95427	1.93247	1.90202	1.91874	1.31081	1.27771	1.21917	1.10549	1.21785	1.0754	1.03636	1.00693	1.03953	1.00652	1.05905	1.06223	0.932983	0.957993	1.08272	0.968809	0.982158	1.0323	1.30375	1.20518	1.17408	1.21666	1.20724	1.21618
176	1.93294	1.84264	1.68238	1.64031	1.57331	1.60914	1.47027	1.85145	1.97824	1.93096	1.92146	1.9221	1.31175	1.28954	1.27821	1.13133	1.25594	1.02545	1.04093	0.989887	1.05002	1.00658	1.04712	1.03401	0.918221	0.945951	1.07858	1.00764	0.959108	1.02756	1.31861	1.18848	1.16315	1.17468	1.17496	1.20962
178	1.903	1.7977	1.67338	1.68006	1.56245	1.58798	1.48001	1.89153	2.03026	1.98791	1.9361	1.95775	1.31268	1.26491	1.26059	1.12286	1.2204	1.03856	1.03313	1.00585	1.04595	0.988205	1.01528	1.04231	0.949957	0.948255	1.07357	0.986735	0.963226	1.02643	1.32408	1.21383	1.17727	1.21668	1.19787	1.21424
180	1.87929	1.86119	1.71225	1.70213	1.56299	1.57267	1.49981	1.9301	2.00748	1.99166	2.00187	1.93192	1.33217	1.27093	1.24838	1.11255	1.2348	0.98377	1.01408	1.0168	1.07753	1.00156	1.03264	1.04153	0.922296	0.94249	1.07508	0.983514	0.965491	1.03198	1.33536	1.19974	1.16219	1.2408	1.23946	1.24057
182	1.92581	1.84879	1.68993	1.72468	1.57382	1.60138	1.48292	1.88744	2.02465	1.95499	1.96863	1.94411	1.31263	1.3045	1.263	1.09472	1.26598	1.02367	1.01106	0.99323	1.07967	1.00103	1.01831	1.05557	0.935228	0.930498	1.05775	0.988687	0.977738	1.01137	1.27044	1.19584	1.15591	1.22511	1.21659	1.22974
184	1.92099	1.84787	1.66654	1.69404	1.57624	1.59369	1.49184	1.91084	2.03965	1.99266	2.02195	2.00914	1.27561	1.29762	1.26462	1.10175	1.26663	1.05455	1.0112	0.992429	1.05701	0.995655	1.04301	1.08048	0.935488	0.940393	1.07355	0.955493	0.958108	1.04158	1.33452	1.20453	1.19063	1.23848	1.22842	1.27679
186	1.93516	1.83921	1.67221	1.673	1.57536	1.60462	1.50027	1.92397	2.03528	1.99538	2.03448	1.97748	1.32048	1.23954	1.25201	1.11846	1.22677	1.05397	1.01751	0.986937	1.04995	0.996895	1.02362	1.07558	0.941102	0.935156	1.07651	0.969171	0.959884	1.00076	1.33243	1.18705	1.16498	1.23746	1.2429	1.23201
188	1.97324	1.8809	1.74162	1.70144	1.60106	1.60458	1.53799	1.90652	2.06927	1.9706	2.00282	2.01696	1.34862	1.29668	1.21327	1.12838	1.19956	1.039	0.997324	0.988786	1.02061	1.01407	0.984139	1.05474	0.973695	0.919711	1.0923	0.972784	0.965303	1.0062	1.32182	1.2301	1.19483	1.23815	1.2212	1.195
190	2.00647	1.88489	1.75076	1.70225	1.64324	1.64275	1.52967	1.96772	2.06218	2.0085	2.06585	2.00603	1.35141	1.34654	1.29992	1.14015	1.26343	1.09326	0.991496	0.991912	1.07102	1.01001	0.995104	1.07409	0.933569	0.912063	1.09459	0.94587	0.99024	1.01048	1.34934	1.21654	1.19635	1.28066	1.2938	1.22238
192	2.01228	1.88761	1.77284	1.77433	1.61325	1.65075	1.54201	1.97879	2.06688	1.99046	2.04805	1.99608	1.39812	1.35762	1.24691	1.14407	1.31033	1.09507	0.989255	0.985143	1.08228	1.00755	1.01635	1.05443	0.916465	0.912385	1.08032	0.948185	0.942896	1.01347	1.34258	1.20557	1.20986	1.24983	1.22958	1.25021
194	2.02259	1.90536	1.74391	1.70126	1.6445	1.65262	1.5824	1.9895	2.01904	2.03133	2.07164	2.01832	1.37073	1.29007	1.2503	1.116	1.26072	1.05535	0.995643	1.00353	1.05081	0.993317	1.0253	1.04628	0.932929	0.943828	1.08185	0.940103	0.977083	1.01875	1.35525	1.19851	1.23928	1.26234	1.23665	1.20614
196	2.01742	1.87595	1.74656	1.73773	1.6167	1.66	1.56912	1.94725	2.03281	2.00178	2.07426	2.03067	1.36662	1.25926	1.19293	1.11632	1.24618	1.07204	1.00516	0.992347	1.03703	1.00155	1.01743	1.04688	0.911621	0.925665	1.08852	0.955825	0.967512	1.00593	1.34289	1.23766	1.2242	1.25297	1.23829	1.21257
198	2.04115	1.87895	1.73995	1.71478	1.62594	1.67089	1.57639	1.99255	2.10383	2.01961	2.0573	2.048	1.35435	1.31959	1.24325	1.12296	1.24848	1.04729	0.991911	0.978019	1.02063	1.01283	1.00803	1.05292	0.905486	0.916258	1.09413	0.954909	0.955488	1.03115	1.32464	1.20481	1.182	1.22962	1.26812	1.20509
200	2.04512	1.9129	1.74412	1.7577	1.63548	1.68942	1.5617	1.98897	2.03747	2.04499	2.05814	2.07996	1.35695	1.35352	1.23012	1.12272	1.26645	1.07758	0.994296	0.958568	1.03076	1.01202	1.00553	1.04411	0.92595	0.905711	1.09684	0.946987	0.937268	1.02294	1.35541	1.22659	1.19956	1.20734	1.23615	1.23645

## Sheet: Fig3-S1A.2
Gene	NTC2-1			NTC2-2			PRKACA si1			PRKACA si2			PRKACA si3			PRKACA si17
PRKACA	-0.596216	-0.244964	0.536301	-1.12881	0.775125	0.658567	-3.94298	-3.23519	-3.16883	-4.69595	-4.77605	-4.39977	-2.95117	-3.05426	-3.02657	-2.93273	-2.80737	-2.80785
