# Supplementary material for: Oncogenic PKA signaling increases c-MYC protein expression through multiple targetable mechanisms
Source: eLife. 2023 Jan 24;12:e69521. doi: 10.7554/eLife.69521 (PMC9925115; doi:10.7554/eLife.69521)
Supplement: Figure 3—figure supplement 1—source data 2. [file elife-69521-fig3-figsupp1-data2.xlsx]

## Sheet: Fig3-S1B
Elapsed	no dox		+dox
36	1	0	1	0
38	0.991377	0.00847754	0.959685	0.0125174
40	0.984576	0.00848109	0.922451	0.0152464
42	0.978067	0.00920691	0.891965	0.015756
44	0.974529	0.0090271	0.862327	0.016058
46	0.971899	0.00935445	0.83979	0.0143323
48	0.969684	0.0114421	0.813799	0.0143027
50	0.96969	0.0115636	0.799385	0.0160066
52	0.970098	0.0117242	0.781195	0.0153156
54	0.971564	0.012496	0.770724	0.0152938
56	0.970661	0.0120991	0.754944	0.0162479
58	0.972767	0.0152984	0.741497	0.0145319
60	0.976061	0.0130736	0.735007	0.0150744
62	0.979517	0.014407	0.725822	0.0189768
64	0.983196	0.0153334	0.715031	0.0155812
66	0.989151	0.0133476	0.710686	0.0201612
68	0.990688	0.0171442	0.701564	0.0179405
70	0.997346	0.0182218	0.696123	0.0198711
72	1.00152	0.0170869	0.693521	0.0203913
74	1.01045	0.0189255	0.690119	0.0219035
76	1.01666	0.0181231	0.68321	0.0182287
78	1.02507	0.0205516	0.684936	0.0204819
80	1.03309	0.0216093	0.683325	0.0206464
82	1.04053	0.0222817	0.680746	0.0248559
84	1.04891	0.0216431	0.676905	0.0242074
86	1.05698	0.0236566	0.677301	0.0270692
88	1.06456	0.0231408	0.679698	0.0296808
90	1.07557	0.0250851	0.674337	0.0291429
92	1.08115	0.0250236	0.669849	0.0350472
94	1.09169	0.0279382	0.677074	0.0364418
96	1.10168	0.0314903	0.675863	0.0420124
98	1.11198	0.031774	0.677951	0.0445018
100	1.12115	0.032637	0.674915	0.048041
102	1.12912	0.0345339	0.677122	0.0542825
104	1.13885	0.0403052	0.676783	0.055874
106	1.14649	0.0425557	0.675341	0.0575384
108	1.15555	0.0469628	0.676097	0.0636599
110	1.17042	0.0482283	0.684588	0.0700157
112	1.1773	0.0503939	0.686267	0.069466
114	1.18725	0.0522009	0.688779	0.07668
116	1.19619	0.0547545	0.689838	0.0825397
118	1.20743	0.0558891	0.695471	0.0805179
120	1.21714	0.0578471	0.694856	0.0868048
122	1.22484	0.0560753	0.698524	0.0903862
124	1.23604	0.0576764	0.703457	0.0956356
126	1.24771	0.0570761	0.709047	0.0932305
128	1.25827	0.0574032	0.712484	0.0973796
130	1.26548	0.0574575	0.718528	0.0992984
132	1.27822	0.0562377	0.718813	0.102507
134	1.28711	0.048506	0.723097	0.108436
136	1.29548	0.0457552	0.726515	0.109443
138	1.30362	0.0463513	0.731059	0.112718
140	1.31579	0.048281	0.732881	0.112344
142	1.32444	0.0489752	0.738914	0.117332
144	1.33594	0.0532929	0.746389	0.124595
146	1.34863	0.056455	0.748889	0.127416
148	1.36312	0.0586535	0.749477	0.126925
150	1.37464	0.0633097	0.752996	0.128803
152	1.38189	0.0619846	0.754171	0.129686
154	1.39582	0.0662301	0.754034	0.122937
156	1.40564	0.0665507	0.764417	0.130372
