# Supplementary material for: Oncogenic PKA signaling increases c-MYC protein expression through multiple targetable mechanisms
Source: eLife. 2023 Jan 24;12:e69521. doi: 10.7554/eLife.69521 (PMC9925115; doi:10.7554/eLife.69521)
Supplement: Figure 3—source data 2. [file elife-69521-fig3-data2.xlsx]

## Sheet: 3B
	FLX1		Colo741
	Mean	SD	Mean	SD
0	0	0.175844	0	0.017295
0.5	0.138556	0.14665	0.060408	0.078739
2	0.936445	0.152285	0.173539	0.041224
4	0.758936	0.152685	0.165759	0.14531
