# Supplementary material for: Oncogenic PKA signaling increases c-MYC protein expression through multiple targetable mechanisms
Source: eLife. 2023 Jan 24;12:e69521. doi: 10.7554/eLife.69521 (PMC9925115; doi:10.7554/eLife.69521)
Supplement: Figure 3—source data 7. [file elife-69521-fig3-data7.xlsx]

## Sheet: 3G
	Adrenal	Ovarian
Cholesterol Homeostasis	0.070591
E2F Targets	0.0827056
MYC Targets v1	0.0924829
G2M Checkpoint	0.105518
MYC Targets v2	0.153548	0.177647
Mitotic spindle	0.174334
mTORC1 signaling	0.180131
Unfolded protein response	0.19246
