# Supplementary material for: Oncogenic PKA signaling increases c-MYC protein expression through multiple targetable mechanisms
Source: eLife. 2023 Jan 24;12:e69521. doi: 10.7554/eLife.69521 (PMC9925115; doi:10.7554/eLife.69521)
Supplement: Figure 4—figure supplement 1—source data 1. [file elife-69521-fig4-figsupp1-data1.xlsx]

## Sheet: Fig4-S1A
	PRKACA			MYC
siPRKACA1	-3.73498	-3.04798	-3.02254	-1.02335	0.2018	-1.01775
siPRKACA2	-3.12104	-3.1776	-3.02308	0.453122	0.771117	0.806121
siPRKACA17	-2.78599	-2.30415	-2.47926	-0.548297		-0.887063
siMYC14				-1.71703	-1.06687	-0.797685
siMYC15				-1.25484	-0.715159	-1.11983
siMYC35				-1.26681	-0.880958	-1.01934
