# Supplementary material for: Oncogenic PKA signaling increases c-MYC protein expression through multiple targetable mechanisms
Source: eLife. 2023 Jan 24;12:e69521. doi: 10.7554/eLife.69521 (PMC9925115; doi:10.7554/eLife.69521)
Supplement: Figure 4—figure supplement 1—source data 2. [file elife-69521-fig4-figsupp1-data2.xlsx]

## Sheet: Fig4-S1B
Colo741 with siRNA
	NTC siRNA										c-MYC siRNA
Well	#1	#2	#3	#4	#5	#6	#7	#8	#9	#10	#1	#2	#3	#4	#5	#6	#7	#8	#9	#10
0:00:00	1	1	1	1	1	1	1	1	1	1	1	1	1	1	1	1	1	1	1	1
2:00:00	1.0279	1.03156	1.01061	1.04393	1.04014	1.0333	1.0319	1.03734	1.02436	1.02149	1.03198	1.04599	1.02649	0.993689	1.05978	1.01924	1.04508	1.05229	1.02802	1.0727
4:00:00	1.05863	1.04954	1.01249	1.05304	1.06035	1.04963	1.05041	1.05562	1.04881	1.05847	1.06512	1.06753	1.04582	1.0114	1.09839	1.02474	1.0736	1.06833	1.0669	1.08266
6:00:00	1.07666	1.06117	1.03902	1.0849	1.06205	1.0683	1.04188	1.07463	1.0581	1.06766	1.08778	1.08653	1.05707	1.02455	1.11429	1.0517	1.10657	1.10053	1.09321	1.11493
8:00:00	1.11538	1.06515	1.0411	1.07602	1.07359	1.09273	1.0934	1.0887	1.07981	1.07737	1.13215	1.1072	1.07635	1.0555	1.15203	1.07899	1.12119	1.10953	1.11222	1.12572
10:00:00	1.12855	1.0839	1.06339	1.10195	1.11529	1.10119	1.11234	1.10676	1.09829	1.09405	1.14198	1.12022	1.08508	1.07682	1.15365	1.081	1.15007	1.14425	1.1447	1.16516
12:00:00	1.14337	1.11424	1.08839	1.11072	1.1348	1.12336	1.12606	1.12007	1.10569	1.11018	1.1402	1.13935	1.10084	1.08156	1.18432	1.14063	1.1635	1.15029	1.17227	1.20704
14:00:00	1.18644	1.14055	1.13355	1.15225	1.15242	1.15224	1.1448	1.16943	1.14655	1.13412	1.18469	1.18158	1.1292	1.1204	1.20082	1.1435	1.2269	1.17907	1.17153	1.23572
16:00:00	1.21073	1.15964	1.15899	1.17212	1.19298	1.17638	1.1819	1.20618	1.16465	1.14478	1.21551	1.19342	1.17351	1.12827	1.22885	1.16477	1.21763	1.22028	1.18162	1.26737
18:00:00	1.25209	1.17619	1.17999	1.19032	1.20592	1.20993	1.21276	1.21996	1.20234	1.17957	1.23561	1.20794	1.186	1.13904	1.24769	1.17767	1.24616	1.25208	1.19641	1.27748
20:00:00	1.28172	1.24276	1.23399	1.23037	1.2346	1.23997	1.23558	1.25598	1.23655	1.23923	1.26084	1.24856	1.21513	1.19166	1.2513	1.22228	1.28367	1.26974	1.24711	1.2911
22:00:00	1.30867	1.23179	1.23706	1.2538	1.29313	1.27288	1.27529	1.27623	1.2687	1.25956	1.29354	1.25457	1.27607	1.20896	1.31256	1.27745	1.30837	1.29827	1.31537	1.31646
24:00:00	1.33181	1.29249	1.29857	1.30021	1.3086	1.28861	1.30431	1.32841	1.28723	1.28918	1.32458	1.32317	1.29467	1.22464	1.33496	1.27594	1.31315	1.33269	1.31936	1.35199
26:00:00	1.399	1.30812	1.31	1.32465	1.35207	1.33964	1.33834	1.3377	1.33417	1.31685	1.3337	1.30469	1.32381	1.25684	1.34058	1.30845	1.339	1.33973	1.33385	1.37866
28:00:00	1.39962	1.33908	1.35364	1.36685	1.42757	1.3542	1.39821	1.39823	1.37049	1.33422	1.37797	1.36688	1.36701	1.28403	1.35816	1.35349	1.37531	1.40198	1.38148	1.39749
30:00:00	1.46427	1.41037	1.37034	1.40699	1.43093	1.39579	1.42211	1.44804	1.44171	1.38406	1.40098	1.35831	1.39088	1.30239	1.39789	1.37999	1.41479	1.42557	1.40097	1.44355
32:00:00	1.50377	1.44704	1.43658	1.44011	1.49149	1.44765	1.48949	1.50291	1.46692	1.42768	1.43986	1.3977	1.43085	1.34409	1.43727	1.41731	1.49499	1.4728	1.44605	1.46614
34:00:00	1.54622	1.44199	1.46673	1.50042	1.52658	1.45201	1.51379	1.51078	1.50879	1.46259	1.45666	1.43486	1.4653	1.38796	1.42381	1.44527	1.4569	1.51456	1.44072	1.48828
36:00:00	1.59218	1.51323	1.50305	1.54719	1.59174	1.52406	1.54144	1.55647	1.51786	1.50064	1.49151	1.4472	1.49308	1.4217	1.48277	1.46487	1.5002	1.54999	1.48414	1.54646
38:00:00	1.64367	1.58505	1.54823	1.57495	1.62614	1.56791	1.61023	1.59935	1.58332	1.51815	1.56514	1.50334	1.55984	1.46087	1.53912	1.50132	1.55483	1.56489	1.51051	1.57083
40:00:00	1.66148	1.59296	1.62628	1.64011	1.67068	1.59893	1.6526	1.63866	1.59017	1.57799	1.56204	1.51534	1.57993	1.47127	1.54234	1.5638	1.59002	1.60889	1.53681	1.58364
42:00:00	1.73114	1.67182	1.64014	1.67916	1.73875	1.64941	1.72339	1.6972	1.6486	1.62074	1.59767	1.5723	1.62925	1.50302	1.58775	1.61864	1.65471	1.64312	1.57335	1.61535
44:00:00	1.76898	1.71462	1.71483	1.71164	1.76426	1.68342	1.79024	1.73579	1.68772	1.66596	1.63593	1.60649	1.6735	1.55089	1.59696	1.64037	1.66313	1.69375	1.59816	1.68682
46:00:00	1.82552	1.7505	1.75805	1.76791	1.77842	1.74991	1.7965	1.77703	1.73998	1.71169	1.66559	1.62039	1.75695	1.58386	1.67629	1.67525	1.71237	1.73513	1.61931	1.67159
48:00:00	1.89275	1.79634	1.80759	1.83046	1.85639	1.78222	1.85278	1.83395	1.78791	1.77761	1.71328	1.67052	1.76952	1.61357	1.70707	1.72636	1.77851	1.76233	1.69304	1.72163
50:00:00	1.94548	1.86027	1.87507	1.86677	1.89006	1.81631	1.91088	1.89376	1.83196	1.81079	1.7491	1.7013	1.81934	1.6594	1.69266	1.76067	1.78105	1.79233	1.68329	1.78681
52:00:00	2.00299	1.87625	1.9369	1.90737	1.95189	1.87646	1.9847	1.94474	1.88607	1.8695	1.82115	1.75613	1.86112	1.70276	1.7364	1.82584	1.86053	1.8453	1.73023	1.82892
54:00:00	2.07217	1.94525	1.9526	1.97634	2.04897	1.94252	2.04828	2.02401	1.9293	1.91039	1.84293	1.78141	1.8755	1.74981	1.79617	1.84898	1.90049	1.87877	1.77667	1.84912
56:00:00	2.12485	1.98836	2.0185	2.02846	2.1009	1.98455	2.10488	2.09546	1.99356	1.95165	1.884	1.81544	1.92802	1.7971	1.83792	1.90569	1.93331	1.91113	1.78538	1.88069
58:00:00	2.18008	2.07657	2.07821	2.10216	2.1284	2.07137	2.14552	2.16416	2.05949	2.03138	1.92285	1.86079	1.99057	1.80678	1.88633	1.94234	1.98218	1.94119	1.85057	1.91997
60:00:00	2.23643	2.12064	2.11143	2.13319	2.18771	2.12917	2.20054	2.20746	2.12488	2.03215	2.01363	1.90808	2.0389	1.87568	1.9356	2.00201	2.03138	1.98278	1.87092	2.00828
62:00:00	2.32338	2.16885	2.17948	2.18018	2.273	2.18636	2.28633	2.29899	2.19988	2.12987	2.02934	1.90851	2.0436	1.89957	1.9445	2.01307	2.07718	2.04323	1.94934	2.03682
64:00:00	2.36235	2.23609	2.26696	2.26672	2.31137	2.22007	2.3668	2.36476	2.26769	2.18663	2.04392	1.97758	2.09766	1.95976	2.00946	2.10585	2.13281	2.09762	1.98706	2.08082
66:00:00	2.42114	2.26976	2.29656	2.33104	2.35835	2.29211	2.44758	2.41131	2.31364	2.22674	2.08231	2.0137	2.13232	1.99013	2.04902	2.13314	2.18013	2.12267	2.03434	2.12006
68:00:00	2.46622	2.34267	2.42248	2.40743	2.44879	2.34807	2.51652	2.44597	2.3762	2.26474	2.12731	2.05057	2.20873	2.09878	2.12104	2.19855	2.20716	2.17855	2.03474	2.17063
70:00:00	2.52157	2.37982	2.44942	2.44826	2.50832	2.40792	2.56653	2.53905	2.43695	2.32557	2.16105	2.08329	2.23131	2.10325	2.21677	2.23385	2.27041	2.20406	2.06897	2.21033
72:00:00	2.56219	2.45754	2.51513	2.51167	2.5703	2.47415	2.61995	2.59842	2.52716	2.38694	2.23219	2.19733	2.3125	2.14428	2.26044	2.29135	2.27133	2.27643	2.15745	2.28431
74:00:00	2.61405	2.46565	2.55706	2.54931	2.62763	2.49604	2.70765	2.68906	2.56013	2.45397	2.26434	2.16583	2.34364	2.15134	2.25495	2.33691	2.38119	2.27973	2.18272	2.30834
76:00:00	2.69976	2.55189	2.64994	2.65239	2.70439	2.53576	2.80066	2.74283	2.62653	2.4907	2.34524	2.23841	2.38232	2.2301	2.32126	2.34981	2.40689	2.35114	2.2255	2.35394
78:00:00	2.7776	2.62247	2.68412	2.70693	2.78297	2.63644	2.88726	2.81245	2.66569	2.56959	2.37219	2.23695	2.44521	2.27762	2.39223	2.44553	2.49332	2.3881	2.26559	2.43928
80:00:00	2.85304	2.68938	2.78492	2.78763	2.81491	2.71466	2.9679	2.88821	2.72658	2.63205	2.42049	2.29013	2.50026	2.29367	2.39763	2.49435	2.55163	2.45013	2.37285	2.4666
82:00:00	2.90917	2.74848	2.81308	2.82037	2.95361	2.76077	3.01943	2.94792	2.76758	2.67402	2.47627	2.33249	2.48811	2.34499	2.48125	2.50803	2.56986	2.52201	2.36577	2.5214
84:00:00	2.97685	2.8381	2.91411	2.89953	3.00131	2.83606	3.05465	3.01378	2.85583	2.779	2.52191	2.35485	2.55957	2.38692	2.55443	2.56966	2.65334	2.56102	2.43332	2.60275
86:00:00	3.0895	2.87375	2.97754	2.97868	3.04772	2.93134	3.16878	3.09733	2.93561	2.85453	2.55767	2.37693	2.55627	2.4187	2.60727	2.63723	2.69625	2.60176	2.4789	2.63212
88:00:00	3.14236	2.93287	3.06628	3.04548	3.11713	2.9925	3.27118	3.1631	2.97936	2.91534	2.65653	2.41465	2.62649	2.4775	2.62184	2.6802	2.78193	2.70167	2.54813	2.68646
90:00:00	3.18647	3.01957	3.13117	3.11179	3.16607	3.02039	3.3323	3.23033	3.06584	2.9802	2.67113	2.47538	2.66673	2.51578	2.66234	2.79201	2.84617	2.75909	2.578	2.7352
92:00:00	3.26757	3.12389	3.22479	3.1879	3.24632	3.11683	3.41563	3.31489	3.11842	3.03129	2.73729	2.54854	2.71606	2.59038	2.75753	2.8067	2.88812	2.82966	2.63665	2.80168
94:00:00	3.33018	3.15967	3.27476	3.20891	3.31561	3.14977	3.48474	3.3877	3.16665	3.09869	2.77372	2.60013	2.77766	2.65571	2.83434	2.85666	2.91685	2.89902	2.69947	2.83934
96:00:00	3.37717	3.23018	3.33774	3.30726	3.42532	3.21288	3.5232	3.47943	3.27138	3.16103	2.8387	2.65047	2.81654	2.69391	2.87806	2.9625	2.98711	2.91558	2.76808	2.90731
98:00:00	3.45416	3.3166	3.36421	3.37389	3.46523	3.30484	3.60228	3.55124	3.36047	3.21747	2.86543	2.71036	2.86902	2.7785	2.93758	2.97667	3.03488	2.98207	2.80038	2.94477
100:00:00	3.54503	3.38795	3.47859	3.4123	3.55551	3.40706	3.70667	3.64002	3.46027	3.30331	2.94631	2.75747	2.9621	2.81167	2.93281	3.08312	3.09519	3.04633	2.89257	3.03955
102:00:00	3.62054	3.48767	3.58865	3.50175	3.67513	3.44943	3.77524	3.72399	3.52292	3.3505	3.01509	2.79648	3.02791	2.84854	3.03473	3.12305	3.15472	3.1071	2.94329	3.06451
104:00:00	3.71825	3.55966	3.63046	3.62385	3.71922	3.53766	3.8538	3.84376	3.62255	3.40922	3.0416	2.85544	3.14319	2.93826	3.05641	3.17911	3.24649	3.19855	2.95435	3.11371
106:00:00	3.78147	3.64461	3.72487	3.68549	3.86843	3.6143	3.94414	3.92143	3.70002	3.49519	3.09483	2.92349	3.19597	3.00603	3.13161	3.24306	3.29717	3.22093	2.98086	3.15199
108:00:00	3.88878	3.74213	3.81086	3.77361	3.91624	3.69725	4.03133	4.01891	3.81252	3.5177	3.15063	2.94402	3.27387	3.0391	3.1892	3.32566	3.37088	3.29525	3.07356	3.2128
110:00:00	3.97365	3.77703	3.90675	3.84725	3.97932	3.78787	4.12181	4.09884	3.8776	3.61668	3.17457	3.01652	3.28453	3.10872	3.25756	3.37095	3.4366	3.35745	3.08859	3.22713
112:00:00	3.99279	3.8704	3.99969	3.938	4.05312	3.84063	4.23188	4.18659	3.96629	3.62459	3.26866	3.02689	3.33798	3.18378	3.35631	3.43179	3.51081	3.40305	3.14364	3.28939
114:00:00	4.04328	3.94017	4.03551	4.00762	4.168	3.92985	4.30306	4.26416	4.0484	3.77441	3.38336	3.14103	3.39508	3.26082	3.39958	3.54877	3.58173	3.46277	3.1773	3.3715
116:00:00	4.17915	4.03134	4.17296	4.11807	4.30807	4.02874	4.49444	4.41552	4.18061	3.9056	3.43848	3.20435	3.52929	3.36512	3.51695	3.65389	3.73417	3.61979	3.29566	3.45427
118:00:00	4.2409	4.13595	4.19391	4.19563	4.35572	4.119	4.57517	4.51702	4.29863	3.92735	3.55103	3.2994	3.57864	3.46114	3.57911	3.68544	3.76091	3.65583	3.36524	3.54004
120:00:00	4.29813	4.1901	4.31496	4.26788	4.48575	4.23579	4.65764	4.59044	4.41957	4.06738	3.60266	3.34723	3.60791	3.51128	3.64954	3.84502	3.86744	3.72713	3.42605	3.57841
122:00:00	4.39058	4.28259	4.42362	4.35232	4.50527	4.3111	4.7774	4.69063	4.47071	4.09267	3.68798	3.42505	3.70939	3.58016	3.72129	3.88761	3.96782	3.77321	3.49001	3.64737
124:00:00	4.49527	4.33905	4.52723	4.4571	4.61736	4.34276	4.92926	4.79755	4.5721	4.2037	3.75395	3.46664	3.80096	3.64738	3.74483	3.99543	4.06867	3.87336	3.59668	3.72688
126:00:00	4.52166	4.44599	4.65154	4.51577	4.73033	4.44426	5.00089	4.87815	4.67691	4.256	3.83969	3.55196	3.85789	3.65085	3.82427	4.04524	4.13671	3.96296	3.65437	3.79264
128:00:00	4.61982	4.53527	4.71489	4.62252	4.78606	4.52796	5.09122	4.98431	4.73742	4.37533	3.89861	3.64085	3.9486	3.76624	3.8829	4.09949	4.21294	4.0331	3.73033	3.87822
130:00:00	4.68203	4.62868	4.7916	4.6999	4.93026	4.588	5.19917	5.1138	4.86214	4.48845	3.90708	3.67986	3.97392	3.83546	3.95195	4.17041	4.29683	4.1067	3.79062	3.88315
132:00:00	4.8052	4.70255	4.84906	4.74999	5.009	4.73519	5.30874	5.20218	4.92177	4.53673	4.05012	3.74922	4.04519	3.91445	4.05962	4.2735	4.39588	4.18886	3.86269	3.9907
134:00:00	4.87528	4.77649	5.00479	4.88176	5.14219	4.81163	5.38153	5.32388	5.01511	4.58456	4.08616	3.8239	4.15776	3.96939	4.17168	4.3207	4.45197	4.25518	4.02122	4.05454
136:00:00	4.96028	4.90505	5.11119	4.97281	5.29963	4.95213	5.53335	5.43269	5.16817	4.6983	4.17104	3.91125	4.21682	4.10656	4.23672	4.44061	4.5989	4.35772	4.06784	4.18891
138:00:00	5.0512	4.99235	5.22752	5.107	5.38795	5.05082	5.66086	5.54718	5.24455	4.79542	4.24968	3.97742	4.30265	4.15945	4.3424	4.52846	4.68207	4.45248	4.14405	4.21449
140:00:00	5.11501	5.09358	5.24105	5.1877	5.43532	5.11163	5.75677	5.61941	5.34233	4.83628	4.30339	4.01699	4.33718	4.2361	4.40734	4.58765	4.70923	4.49224	4.23368	4.26151
142:00:00	5.22349	5.18579	5.35643	5.27134	5.58089	5.1783	5.82229	5.73227	5.44928	4.95894	4.39583	4.07557	4.43606	4.30556	4.48777	4.63206	4.80228	4.59403	4.29692	4.35838
144:00:00	5.29153	5.29078	5.47182	5.42553	5.7016	5.30456	5.93201	5.83675	5.55059	5.06552	4.45011	4.13709	4.47884	4.34235	4.59635	4.72763	4.88132	4.6919	4.37558	4.39452
