# Supplementary material for: Oncogenic PKA signaling increases c-MYC protein expression through multiple targetable mechanisms
Source: eLife. 2023 Jan 24;12:e69521. doi: 10.7554/eLife.69521 (PMC9925115; doi:10.7554/eLife.69521)
Supplement: Figure 4—source data 1. [file elife-69521-fig4-data1.xlsx]

## Sheet: 4A
Genes	log2FoldChange	padj
		not ignificant	Significant	PRKACA	MYC target
PRKACA	-2.41199			209.66
ADH1C	3.45637		190.474
SLC7A5	-2.07122		187.719
DUSP1	-1.94398		180.449
IGFBP1	-2.22399		171.062
ODC1	-1.95923				152.222
CEMIP	-2.42678		148.188
PCSK1	-1.97444		132.946
UNC13A	-2.87318		121.597
C4A	4.23391		118.755
RPS27L	2.05511		116.1
SDCBP2	-2.1937		111.261
FN1	1.85566		110.864
SERPINA6	2.35764		108.045
LCN2	1.37755		106.712
FA2H	-1.61315		106.514
BASP1	-1.59998		103.243
TNFSF14	2.92469		99.3666
MAFK	-1.61441		98.4629
NR4A1	-1.9411		97.8928
FOXL1	-1.57678		96.4012
C3	1.66923		93.1095
CRP	2.19366		92.0577
TFPI2	2.51239		85.2837
IRS2	-2.05656		83.2972
OAT	-1.47403		82.9037
PDZK1IP1	1.43278		82.5129
CHST4	2.06662		82.0966
GPRC5B	1.73831		81.4058
CCNG1	1.65961		81.1935
FST	-1.28553		80.8824
CH507-42P11.8	-1.62321		79.6465
RP11-432M8.8	-2.97606		78.7338
FOS	-1.64678		77.8148
LRG1	2.20718		74.0814
AKAP12	-1.77282		73.4578
FZD10	-2.08742		69.2014
SCARA5	-1.19215		68.9711
VNN1	1.33885		68.3466
PCK1	-2.17528		67.8776
CXCL16	-1.18148		66.9198
ETS2	-1.41541		64.4575
KRT7	-1.04766		64.142
TNFAIP2	1.1243		63.7034
RASD1	-1.55061		62.4625
CD55	-1.09686		60.4892
RHOF	-1.37651		59.5106
FSTL3	-1.24967		58.6971
SOCS3	-1.5744		57.2581
F3	-1.36168		56.7667
SMOC1	-1.31484		56.0164
CPLX2	-1.27074		54.367
CFB	1.81648		53.8126
FAM83A	-1.53348		53.3149
PFKP	-1.04014		52.5425
CYP1B1	1.25127		52.454
CXCL6	2.35996		51.7864
STC1	-1.97384		51.5775
C4B	4.1674		51.3154
CFH	1.38224		50.4665
AREG	-1.5103		50.135
SLC26A9	-1.39607		49.9984
TFF1	-1.21855		49.5614
PLEC	-0.953221		49.2583
NID2	-1.13844		49.2022
GSTA2	2.21269		49.1591
GDF15	-1.51786		49.0677
B4GALT1	-1.06786		48.9988
RND1	-1.58375		48.5095
POLR2C	-1.08756		48.5059
TNFRSF1B	-1.27702		48.3167
C1S	1.5088		48.2236
MBNL1	1.65115		47.9855
TESC	-1.36779		47.4984
DPCR1	-1.62899		47.455
FGG	1.44734		47.2025
KRT80	-1.08765		45.9758
ADAMTS10	1.44232		45.9253
ADGRG1	-1.39426		45.4039
GPRC5A	-1.32509		44.9535
INSL4	-1.70857		44.9515
BMP6	-2.3295		44.9474
CCND1	-1.01764				44.9039
MISP	-0.999916		44.7737
AGT	1.03538		44.0779
RARRES1	2.50023		43.8439
CP	1.10813		43.6813
S100P	-1.01133		43.6195
NRP1	1.14638		43.5013
C4BPA	2.76045		42.7428
SLC25A25-AS1	1.76599		41.7811
ISG20	-1.88479		41.7611
IGFBP3	-0.868819		41.6211
CPS1	-1.03053		41.4448
TNRC6C	-1.57961		40.2674
CFI	4.2636		40.0691
SLC6A14	-1.26756		39.9194
SLC12A7	-0.90873		39.3233
LBP	3.98029		38.6827
SAMD11	-1.19837		38.3858
TM4SF1	-0.96103		38.082
GPR153	-1.08286		37.8002
FER1L6	-1.73679		37.704
SPP1	1.42174		36.1243
CAV1	1.47069		35.9078
PMP22	-1.29555		35.8224
RBFOX3	-1.42885		35.6889
SIK1	-1.75868		35.5196
S100A16	-0.984343		35.3776
SLC7A1	-1.09555		35.3122
KLHDC7A	1.80682		34.7752
RHOB	-0.873775		34.3759
PYGB	-0.803219		34.3648
UGT1A1	-0.865783		34.1117
BDNF	-1.72351		33.9412
APOL6	1.68661		33.8117
RP11-397G17.1	1.6954		33.2982
OSBP2	-1.4641		33.1755
AQP3	-1.3604		33.1021
RAB10	-0.870247		32.711
CASP9	-1.65943		31.9355
ALDH3B1	-0.938279		31.2736
SMOX	-0.926337		31.2736
PLAUR	-1.26145		30.9737
MLKL	-1.1069		30.9434
USH1C	-0.986279		30.7477
ACOT7	-1.15444		30.5214
SOD2	0.998827		30.5019
CEACAM6	-0.7648		30.1765
GC	2.28601		30.1661
SERPINE1	-1.57002		29.9204
ICAM1	1.40951		29.5361
ADCY5	1.93773		29.3387
C1R	1.68506		29.2444
PBXIP1	0.915165		29.1649
BMP2	-0.753804		28.7703
PITX1	-0.989536		28.7126
PLCXD3	4.54942		28.4089
TMEM184A	-1.15489		28.3094
MIDN	-0.83467		27.4935
URB1	-1.06878		27.3346
RDH10	-0.880932		27.003
NFKBIZ	1.07923		26.8681
APOL1	0.925488		26.6787
GCH1	-0.885301		26.6567
TXNIP	2.10378		26.5349
MYLK	1.88849		26.5185
LGALS9	0.988583		26.4369
CREB3L1	-1.07221		26.3528
GSTA1	0.964883		25.8333
FAM46A	-0.955785		25.8032
DACT2	-1.13763		25.3962
MUC13	-0.745609		25.2982
CSF1	1.44281		25.2024
TUBA4A	-0.895876		25.1418
FSTL4	-1.81922		24.6253
AGR2	-0.685953		24.5507
APCS	1.40145		24.4658
HABP2	2.59563		24.0793
HSD17B2	-0.833306		24.0784
GSN	1.2132		23.9091
CNTD2	-2.12128		23.6792
PLA2G4A	-0.923076		23.6792
FAM83F	-1.66861		23.381
ADIRF-AS1	1.47176		23.2278
GALNT1	-0.944918		23.14
GRAMD1B	-0.782004		23.1004
UBA7	2.68253		22.803
TDP2	-0.840533		22.4738
MN1	-0.964286		22.3719
CBX4	-1.01516		22.2986
AHCYL2	-1.0766		22.1731
GPT2	-0.835075		22.1299
SYPL1	1.19428		22.0561
TMEM158	-1.29163		21.8018
HOGA1	1.41725		21.7781
C5AR2	-1.3015		21.7618
IFI16	0.903655		21.7247
MAN1A1	1.18122		21.7105
HN1	-0.76588		21.5087
ATP1B1	-0.58647		21.4986
ARG2	-1.62155		21.4648
ZMYND15	-1.39881		21.2851
BCL6	1.06907		21.2838
RIMKLB	-0.940033		21.2274
B4GALT4	-0.953544		21.2174
TOB1	-0.756721		21.1458
TTLL12	-0.724012		21.1381
VIM	0.904383		21.0695
VDAC2	-0.822706		20.9279
SLC3A2	-0.931671		20.8751
LINC00473	-2.12716		20.8426
IL10RA	-1.86892		20.7653
VASH2	-1.39793		20.6431
HLA-B	0.971429		20.6316
RP1L1	-1.69013		20.5345
NPAS2	-0.872972		20.4453
PDGFA	-1.08478		20.4453
TM4SF5	-1.10171		20.3939
WNT7B	-0.799985		20.2979
FAM107B	-0.896119		20.215
FAM19A5	-1.11308		20.2114
GPT	-0.969889		20.1738
SLC9A3R2	-0.702941		20.1696
DAB2	0.770796		20.0515
STC2	-1.11845		19.945
FURIN	-0.737255		19.9401
LRP8	-0.992579		19.7648
IFNGR1	1.13408		19.7589
SLC7A2	-0.718372		19.6984
IRF1	1.06255		19.6603
UNC5D	-2.27085		19.5904
EFHD2	-0.772139		19.3931
SLC7A7	1.10048		19.2633
SLC6A3	-1.0511		18.9901
CLDN1	0.94919		18.9055
HIST2H2AA4	-0.843563		18.8554
HGD	-0.643874		18.768
SLC45A4	-1.38925		18.7405
FGA	0.778227		18.726
9-Sep	-0.598799		18.6843
AHNAK	0.792347		18.6712
DGKG	-1.48793		18.6632
KRT4	6.45469		18.6571
DUSP4	-0.676174		18.609
SPIRE2	-0.767536		18.5414
ANXA4	0.617671		18.482
LMNB1	1.15		18.4749
UBE2L6	3.23915		18.4517
CH507-42P11.6	-1.59105		18.4012
SLC16A14	-1.31399		18.2213
PER2	-1.31045		18.1912
RGCC	-1.99854		18.0774
KRT16	-1.34486		18.0739
CXCL1	0.791276		18.0416
MAN2A1	1.00473		18.0092
KSR1	-1.07554		17.9829
PLPP1	1.15853		17.9777
ADAM28	1.21047		17.9453
ABHD12	-0.74511		17.9252
PIK3R1	1.08703		17.9217
UNC5A	1.28382		17.8382
ATP2A2	-0.636491		17.8233
SDCBP	0.827025		17.8134
IER3	-0.849588		17.739
DCLK1	-2.98386		17.6696
OGT	0.881623		17.5433
TSC22D2	-1.02721		17.5071
COLCA1	2.037		17.4721
IFITM3	0.73631		17.4259
DDX10	-1.16076		17.4073
RCAN2	2.11507		17.4057
PTPRF	0.779645		17.1844
S100A10	-0.595636		17.1657
PLXND1	0.921033		17.1412
IFITM10	1.11373		17.0597
VTN	0.760934		16.9069
TAX1BP3	1.01095		16.9069
SRXN1	-0.724676		16.82
SPRR3	-1.58987		16.79
KCNK1	-0.814703		16.744
FOXQ1	-1.36436		16.6096
TSPAN15	1.32018		16.5762
GBP2	0.902304		16.4926
CTSC	0.722458		16.4345
MAOB	1.02167		16.3976
PSMB9	2.68959		16.3615
BAG1	-0.913253		16.3457
OGDH	-0.722328		16.0439
SPRYD3	-0.867734		16.0314
CTSS	0.812047		15.921
PTPRN2	-1.08		15.9089
RFK	-0.820975		15.8611
GRAMD1A	-0.896667		15.8511
PDE3A	-0.809257		15.8154
TMEM37	1.29276		15.8124
TOP2A	1.08209		15.7549
FLNB	-0.736893		15.676
MMP7	0.839058		15.6317
B2M	0.571545		15.6173
CYR61	1.03178		15.5492
INSIG1	-0.811728		15.5492
LPCAT1	-0.596893		15.5418
ADSSL1	-0.944363		15.538
DHRS3	-0.625039		15.4466
HES4	-1.0308		15.286
KIF12	2.21607		15.2392
POLM	-1.03367		15.2009
FOXC1	-1.05965		15.1661
KCNK5	0.973881		15.1577
CCDC80	1.43057		14.9832
DCPS	-1.01101		14.844
AVPI1	-0.919096		14.789
PANX2	-0.920145		14.7546
DDIT4	-0.585		14.7439
KALRN	-0.794364		14.6723
JADE1	-0.957464		14.6213
SEPN1	0.768716		14.5242
GEMIN5	1.05338		14.5126
PSMB8	0.938551		14.4297
S1PR1	-0.888037		14.4249
CMTM6	1.43196		14.4137
MLPH	-0.656416		14.4102
PARP9	0.967725		14.3325
ADCK3	1.15516		14.3305
ARL4D	-1.18887		14.2824
NOTCH2	0.924822		14.2778
NOS1	-1.31792		14.272
PMEPA1	-0.772294		14.2408
BAAT	0.788508		14.165
DKK1	-1.71276		14.1501
GADD45B	-0.772283		14.1308
GBP3	0.798554		14.0953
CSGALNACT1	-0.751433		14.0692
EDAR	-1.86607		14.0596
SPATS2L	0.590123		14.0475
ABCB1	0.851773		13.9653
ZFAND3	0.897475		13.961
OAS1	-0.589683		13.9265
TP53INP1	1.38026		13.9265
EPAS1	-0.828634		13.8742
GPC1	-0.645001		13.8049
HYAL1	-0.655517		13.7967
APP	0.589133		13.7385
VDAC1	-0.554698		13.5828
YPEL2	1.52176		13.5571
PSMC4	-0.628826		13.5286
COL27A1	0.774274		13.4562
P4HA3	-1.59562		13.4507
LMO4	-0.816802		13.4385
ASRGL1	0.893905		13.4385
PLIN2	-0.639653		13.403
C1orf198	0.810807		13.3687
SKAP2	-0.896033		13.363
C1orf106	-0.640897		13.3529
ETV4	-1.39558		13.2825
APOB	0.855357		13.2554
DUSP5	-1.12457		13.122
GABARAPL1	-0.638983		13.0922
GPATCH4	-0.682066		12.9487
PDE1C	-1.34345		12.9437
NRP2	-0.646381		12.9282
CSNK1E	-0.625938		12.9108
SDSL	-0.795983		12.9021
CLINT1	0.633824		12.888
BDKRB2	-1.1108		12.8873
PPL	0.684317		12.8348
ARHGEF10L	0.90509		12.8273
DGKD	-1.15578		12.8096
CDYL	-0.955335		12.8022
SLC23A2	-0.624284		12.7677
CKB	-0.605683		12.7375
XBP1	0.53238		12.6601
ARHGEF4	-0.936063		12.6601
CASP1	3.65679		12.6553
UBXN10	-1.2731		12.6549
EDF1	-0.625585		12.6431
PDLIM1	1.25196		12.6069
SERBP1	-0.577823		12.5969
VSIG1	-0.859943		12.4933
GLIS2	0.999586		12.4735
PLIN4	1.51959		12.4308
CTH	-1.03777		12.3715
GPRIN3	-0.919762		12.3269
CYP3A5	0.61915		12.2497
SFRP4	2.40809		12.2466
NOCT	-1.25308		12.2009
DSG2	0.774876		12.1576
TNFSF11	-1.47643		12.1576
PBX1	-0.854472		12.1576
TMC8	-2.75387		12.1195
CD164	0.681206		12.1128
PDXK	-0.828858		12.0867
FAM174A	-0.900017		12.0843
SAMD8	-1.09811		12.0781
PLK2	0.871006		12.0574
PHLDA2	-1.18253		12.0005
PTMS	1.63352		11.9694
SEMA3B	-0.68999		11.953
TBL3	-0.770898		11.953
CXCL8	0.793008		11.9426
ST14	-0.618637		11.8489
RAP1B	0.781691		11.8452
EFNB1	0.680061		11.813
DDA1	-0.721636		11.8013
SDC4	0.917102		11.7939
IFIT3	2.04635		11.7858
FERMT1	-0.789551		11.78
ELMO3	-0.822199		11.6755
ATP1A1	0.579144		11.6719
PPP2CA	-0.53132		11.6448
AMFR	0.667271		11.6439
DZIP3	1.25354		11.5041
GMDS	-0.620837		11.4543
FGFR4	0.57967		11.4468
C2orf72	0.780802		11.4115
SLC12A2	0.672057		11.3926
KCNJ16	0.7619		11.3633
SLC15A1	-0.774469		11.3535
NEB	-0.818916		11.3239
CD14	1.49839		11.293
KIF21B	-0.745311		11.2736
ARFIP1	0.984375		11.2736
HSPA1A	-0.444679		11.2181
VWA7	-1.51381		11.2109
ITGB1	0.514464		11.2087
PDE4B	-1.30775		11.1931
ANXA9	1.69219		11.126
PCDH1	2.12783		11.1224
SPIRE1	-0.748606		11.0937
HLA-E	0.663547		11.0704
EMC10	-0.623394		11.0681
GK	-0.854672		11.0434
DRAM1	1.45912		11.0281
PROS1	0.779628		11.016
PFKFB3	0.489341		10.9666
PIM3	-0.767621		10.9641
NDRG2	0.955839		10.9368
MYO15B	-0.73894		10.9229
TNS2	0.910726		10.8862
RNF130	0.712183		10.8649
CA9	-1.48573		10.8551
C14orf105	1.01576		10.8134
BICC1	1.11914		10.8113
CAV2	0.746035		10.8074
LEPROT	0.748751		10.7892
ST3GAL4	-0.748087		10.7809
RASSF5	1.43325		10.778
SMAD2	-0.816668		10.7652
LAD1	-0.479545		10.7465
PIGR	4.09504		10.7322
POLR2K	-0.827828		10.6816
SORCS2	-1.47952		10.6789
NABP1	1.00717		10.6163
MOB3B	2.26851		10.5747
ELF3	0.471531		10.553
TUBB4B	-0.500356		10.537
UGT2B15	1.82815		10.521
PITPNA	-0.757194		10.5207
CTA-392C11.1	-0.922975		10.5193
ZFAND2A	-0.797363		10.4635
OPN3	-0.70069		10.4622
MATN2	1.78427		10.4617
LAMP1	0.710879		10.4453
MYOM1	-1.7277		10.4059
GNG12	0.741195		10.4057
C4BPB	1.5065		10.3892
TMEM120B	-0.780212		10.3878
ARHGAP18	1.25036		10.3772
DAPK2	1.22927		10.3715
CMIP	-0.501896		10.3574
ATP8B1	1.00494		10.3453
SLC43A1	-0.923717		10.3222
PSMB10	0.752464		10.3101
TMEM97	0.741171		10.3073
NPNT	1.50304		10.2497
DENND2A	-1.61664		10.2475
CEP72	-0.865923		10.2221
GABRE	0.564099		10.2085
ZBTB38	-0.704429		10.1738
SLC6A6	-0.522874		10.1737
EFNB2	1.9867		10.1661
MAP1S	-0.799206		10.154
TNFSF15	1.37353		10.1532
CERS2	0.464848		10.144
GRN	0.56882		10.1278
ALDH3A1	-0.442431		10.1242
LIMS1	0.810944		10.1176
ARF1	-0.451914		10.1169
PBLD	1.36051		10.1157
C1QL1	-1.98151		10.1118
SLC46A3	1.50555		10.1035
NHP2	-0.549557		10.096
HNMT	1.38549		10.0927
TYMS	0.95606		10.056
TP53I11	-0.613072		10.014
TGFB2	0.920838		9.97913
ST5	1.22327		9.95712
MMP24	1.02838		9.91569
FGF12	-1.56246		9.88315
STAT3	0.654595		9.82492
TNFRSF21	0.653912		9.8179
C10orf128	-1.44019		9.80969
RRAS2	1.23005		9.7796
ARRB2	-0.712254		9.75468
ANXA13	1.50383		9.74963
KIF5B	-0.598155		9.74285
ARRDC3	0.919147		9.70109
TNIP1	0.535456		9.67636
IQGAP3	0.735577		9.63414
FARSA	-0.584911		9.62729
STXBP5	-1.10404		9.61624
SIAE	0.826253		9.59229
FAM167A	-0.635308		9.53249
KIF20A	1.01883		9.52744
NFIC	-0.619882		9.49706
FABP5	-0.675381		9.48973
GTF2IP4	0.687747		9.44994
ALDH1A1	-0.427088		9.43267
ADH6	1.60256		9.4223
SLC40A1	0.707772		9.41878
C11orf86	-2.02703		9.41657
SLC9A3R1	-0.416398		9.38643
TRAPPC2L	-0.628757		9.38597
HEG1	1.53141		9.38031
ZNF703	-0.760987		9.36312
EMP2	0.756014		9.33427
MIEN1	-0.729896		9.32955
PSME1	0.568347		9.32752
IL32	1.54354		9.28804
BCAR3	-1.15472		9.28803
AFMID	-0.60996		9.28024
GCKR	2.7388		9.27542
CLCF1	-0.850677		9.2558
CD274	-1.26432		9.22897
TGM3	-1.42257		9.18844
ENAH	0.687499		9.1835
IFIH1	1.2064		9.15262
SAT1	0.512399		9.13449
CREB5	-0.980723		9.13189
RP11-54O7.3	-0.73084		9.12739
HSPA1B	-0.423285		9.11928
CLDND1	-0.833626		9.10601
CEBPB	-0.821022		9.09885
CTIF	0.697296		9.09288
SERP1	-0.675373		9.08154
ATP11A	0.683002		9.07276
FCGBP	1.11118		9.06608
NEURL1B	1.25617		9.06496
ACSS1	1.02687		9.05874
CMBL	0.504872		9.05874
RAB27B	-0.775731		9.02309
BCL9L	-0.564934		9.02161
SLC25A25	-0.954309		9.01664
COPE	-0.544196		8.99277
B4GALT5	0.75113		8.98631
ANKRD33B	1.08774		8.98631
CDHR5	-1.08156		8.97167
CAST	-0.513428		8.96467
ST6GALNAC4	-0.560529		8.96077
MCM7	0.50913		8.95979
LYZ	1.50374		8.93058
ASPH	0.445118		8.92582
RASSF2	0.81981		8.92223
CARD6	0.577809		8.90702
PTS	-0.926965		8.89216
CREB3L2	-0.805852		8.88005
SYNPO	0.501617		8.86781
CST2	-0.525142		8.86631
CHPF	-0.647515		8.85852
SGSH	0.92559		8.85852
SNRPB2	0.854938		8.85821
CH507-42P11.5	-2.9797		8.84445
BCOR	-0.635406		8.82826
SYT1	-2.08138		8.80439
FTH1	-0.418268		8.77465
LGALS1	-0.674279		8.7597
THBS1	1.16619		8.73782
ERGIC1	-0.500007		8.70607
IFIT2	1.77769		8.68276
ATOH8	0.934664		8.64153
PRKAR1A	-0.615627		8.63167
AMOTL2	0.879894		8.62893
JAKMIP1	-1.74638		8.62676
SYNGR2	-0.546802		8.61137
EVA1C	-0.915859		8.60833
NECAP1	-0.955248		8.59139
SDC1	-0.419503		8.58993
MOV10	0.843495		8.58818
C11orf24	-0.779467		8.58612
AJUBA	0.719858		8.58191
UNG	0.756255		8.56103
SLC16A3	-0.509538		8.55201
CH507-338C24.1	1.92817		8.55201
HMOX1	-0.402913		8.51954
ADAMTS7	1.8629		8.51495
SDC3	0.767689		8.51333
SHROOM1	0.565569		8.49196
NPW	-0.522759		8.48471
IGFBP4	0.524846		8.46067
OSMR	0.549577		8.45904
CBR1	-0.488218		8.41102
GLUL	0.800992		8.40191
MAP4K4	-0.580473		8.39996
MXD3	1.19663		8.39996
YIPF6	-0.731249		8.38411
APRT	-0.530662		8.35421
ZC3H14	-0.644203		8.34889
PSME2	0.525742		8.3254
MFSD14B	-0.93725		8.30616
NUDC	-0.51217		8.30273
KLF5	-0.48517		8.30273
CLDN12	0.699485		8.30273
POLB	-0.866953		8.28894
ARL14	-0.749558		8.25822
PPP1R35	-0.775978		8.23167
USP11	-0.67591		8.23099
ZNF467	1.4753		8.21519
ISG15	-0.922681		8.20679
CCDC68	-0.976397		8.20676
NTPCR	0.636342		8.20209
ABLIM1	-0.639384		8.17651
TIPARP	-0.907036		8.16021
ANO6	0.905344		8.15893
TNFRSF1A	0.50547		8.15805
NCCRP1	-2.75657		8.12373
LINC01133	0.95198		8.122
PRKAG2-AS1	-0.915414		8.11269
NMB	0.720486		8.10207
TBC1D2B	0.67984		8.10069
UBE2E3	1.02879		8.09831
SHMT1	0.944347		8.09675
SMAD3	0.644753		8.08406
TMEM131	0.570016		8.08207
F10	-0.680495		8.07345
AOX1	0.836342		8.06992
TUBB4A	-0.748688		8.06382
POLR3H	-0.844545		8.05796
LINC00313	-2.31995		8.04426
TJP2	0.681692		8.03115
SAA2	4.14315		8.00497
CD59	0.58109		7.99715
C10orf90	-1.01988		7.99691
PPP1R16A	-0.635707		7.9837
SDS	-1.80092		7.97952
ANXA1	0.43897		7.97276
RP11-284F21.9	0.860896		7.93388
NR4A2	-1.1829		7.93124
VRK2	-0.682233		7.92622
PVR	-0.52259		7.89447
MYO1E	-0.647472		7.88503
MLEC	0.673948		7.88482
CHST2	-1.19414		7.87863
SAMD4B	-0.549104		7.87678
ALOX5	0.622596		7.86773
SH3BGRL3	-0.637509		7.86773
ARHGEF28	0.799363		7.85343
ZC3HAV1	-0.515945		7.84618
EPHB6	1.44712		7.81182
AHCYL1	0.515105		7.78215
SYK	1.00734		7.72747
CENPF	1.02432		7.72116
GRK5	-0.975279		7.71404
RAB29	0.733239		7.6657
PITPNM1	-0.578998		7.65652
FAM46C	-1.86212		7.63807
ADAMTS9	-0.713834		7.62923
SLC2A1	-0.535415		7.60995
MRPL55	-0.747098		7.60873
SAA1	3.80673		7.6083
PROM1	5.54619		7.60339
RHOQ	0.841509		7.589
MLLT4	-0.49766		7.56285
ACAA1	-0.49148		7.54641
NEDD9	-0.537333		7.52705
GDI1	-0.482307		7.50953
TTLL3	0.905932		7.50709
TPI1	-0.414341		7.49482
CXCL5	0.437492		7.48207
TSKU	-0.538771		7.47396
NDFIP1	-0.481714		7.44618
MDFIC	1.19633		7.44363
NEFL	-1.58611		7.43086
MAP3K1	0.895557		7.41399
GTPBP4	-0.528515		7.40494
IL11	-1.50635		7.40459
UGT1A6	-0.48319		7.37887
DTX3L	0.734806		7.37645
GNL3	-0.729117		7.36237
ERN2	-0.99273		7.35977
PSMD8	-0.527641		7.34004
BMF	1.19357		7.31613
PRSS23	-0.440483		7.26637
PSMA7	-0.471398		7.24812
UCHL1	-0.512548		7.24008
MAST4	0.624369		7.23605
SGK1	-0.628082		7.20321
LPCAT4	0.749497		7.19496
LETMD1	0.862378		7.1888
ZG16B	0.59745		7.1855
NAP1L1	0.486017		7.17868
UNC13B	-0.49855		7.17236
AL135787.1	0.61598		7.17022
C7orf50	-0.624308		7.14138
DNAJB11	-0.50489		7.13818
TRIP10	0.58057		7.12604
POR	-0.435945		7.11525
EIF5A	-0.380125		7.11212
NOC2L	-0.491823		7.10454
NPY5R	-1.09506		7.09588
ZNF622	-0.487048		7.08641
IBTK	-0.595845		7.08162
NSMF	-0.496188		7.07424
LYSMD3	-0.618721		7.06094
ANO8	-0.583909		7.04984
OAF	0.97578		7.04477
CYP26B1	-0.680367		7.03521
SNHG18	0.784547		7.03115
GALNT10	0.679368		7.02729
TRPV1	0.821849		7.00889
CREB3	-0.579054		7.00681
KAZALD1	-0.67979		7.00681
MAP7	-0.629319		6.99845
EMC7	-0.523075		6.95879
PPDPF	-0.567182		6.95336
ADAM9	0.499114		6.94637
BTG2	0.563698		6.94544
NPTXR	0.567056		6.92188
RP3-416H24.1	-0.832249		6.90823
PSMD12	-0.581132		6.90789
MAP3K3	0.990126		6.89747
TRIO	0.642922		6.89711
UHRF1	0.78989		6.89288
STEAP3	0.565131		6.87936
TMEM208	-0.604677		6.87214
ERBB3	0.52569		6.86229
KLF6	0.881818		6.86104
LOXL4	0.76706		6.85687
TERF2IP	-0.500911		6.85629
TMEM92	-0.761043		6.85629
KYNU	-0.425543		6.84958
CNDP2	0.428699		6.84958
ARL2BP	-0.570671		6.84248
SCARB2	0.57395		6.82907
FAM149A	0.713145		6.79241
HSPA5	-0.416927		6.75067
NINJ1	0.689896		6.74953
CCNG2	1.0083		6.73781
GTF2IP1	0.54162		6.73344
MKNK2	-0.489723		6.70621
ALB	0.813875		6.70621
SLCO2B1	2.14288		6.70079
CNTNAP3B	0.686331		6.69691
MKRN1	0.531073		6.68697
ITGB6	0.847111		6.68348
GBP1	4.45804		6.68263
CHMP5	-0.547458		6.68148
SPCS3	-0.625645		6.67593
ACSM3	1.40881		6.66956
KITLG	0.741719		6.66177
SCUBE1	-1.803		6.65939
GUK1	-0.45125		6.64844
CERK	-0.583393		6.64704
ITIH5	0.956263		6.64527
RP11-407N17.3	1.31955		6.64186
EBF4	1.6326		6.64157
EIF4A1	-0.378183				6.63856
AKT2	-0.501337		6.62177
PNPLA7	1.12064		6.61643
INO80C	-0.865489		6.60968
GAPDH	-0.384925		6.59879
NFE2L2	-0.376377		6.5942
CYP21A1P	3.55438		6.58269
MICALL2	-0.586767		6.5805
MYO7A	1.00694		6.57904
ATP5D	-0.526406		6.578
JOSD1	-0.572876		6.56038
SMARCA4	-0.46092		6.55996
RP11-465B22.3	-1.52951		6.55828
PIK3IP1	1.71207		6.54522
TXLNA	0.516883		6.53941
IRF9	0.956135		6.53941
UNC5CL	2.10625		6.50842
MEF2D	-0.442122		6.49826
ABLIM3	0.500432		6.49346
TRIM16	-0.524492		6.48278
COL4A6	-1.0767		6.48131
TGIF1	-0.650335		6.47837
WBSCR22	-0.431615		6.47378
SAP18	-0.474481		6.47107
GAL3ST1	-0.975898		6.46599
ABCG1	-0.876653		6.4594
PAM	0.492636		6.44624
CYSTM1	-0.500514		6.44187
AFAP1L1	1.1844		6.43686
GUCD1	0.492279		6.42604
SKIL	-0.690333		6.41338
ATP6V0C	-0.481132		6.41116
TNFAIP8	0.96922		6.40336
MID1IP1	-0.478004		6.38541
SLC35B4	-0.587119		6.36
TFCP2L1	-0.987242		6.35478
ANP32A	-0.470245		6.35174
LINC01307	-5.04727		6.35174
SLC23A1	1.39314		6.34312
ONECUT2	-0.539124		6.341
LRP5	-0.469796		6.33456
NDUFV2	-0.485169		6.33456
PSMC1	-0.505345		6.33268
FCGRT	0.559261		6.32543
MAP3K10	-0.629817		6.31978
TNFSF10	0.903296		6.30097
SHROOM3	0.838777		6.27307
SERINC5	0.539459		6.27307
TTC1	-0.534032		6.27288
FAM50B	-0.715692		6.26433
CHML	-0.597004		6.2484
CALCOCO1	0.614947		6.23995
RELT	-0.971442		6.22819
CDK4	0.544464		6.2253
LGALS3BP	0.685031		6.22455
IKBKE	0.656018		6.20874
PKHD1	1.06971		6.20308
CPB2	1.7796		6.19968
SOCS1	1.87449		6.1903
TICAM1	-0.624462		6.18445
DBI	0.635895		6.18076
GATM	0.926918		6.17883
UHRF1BP1	0.936392		6.16696
NATD1	1.14272		6.13992
EHBP1	-0.461567		6.13312
SIRPA	-0.391495		6.12289
NQO1	-0.325239		6.10845
TIMP3	-0.968331		6.09996
INF2	-0.407713		6.08646
CTSF	0.699322		6.08499
RIN2	0.886304		6.07923
MYRF	-0.373955		6.0762
FBXW5	-0.457618		6.06613
HNRNPA0	-0.375652		6.06613
NME1	-0.394558		6.05184
DNAJB2	-0.551347		6.05114
ONECUT3	-0.574123		6.0495
FAM20C	-0.559197		6.01044
CYP4V2	0.719963		6.0007
FCHO1	-0.599817		5.99052
NDUFAF3	-0.795593		5.97721
TMEM171	0.933857		5.97129
SDCBP2-AS1	1.54947		5.97129
DPP9	-0.468524		5.9639
LTV1	-0.640504		5.96334
RPH3AL	-0.894154		5.96176
ST6GALNAC1	1.17313		5.96161
C16orf72	-0.462207		5.94786
MRPL12	-0.554053		5.94775
RPL35	-0.457662		5.94703
COX17	-0.825607		5.94695
SCAND1	-0.550636		5.94608
AC091878.1	-2.38555		5.93025
HMCN2	-2.73281		5.92241
CXXC5	0.522246		5.89033
CSTB	-0.4569		5.88825
YIPF2	-0.551566		5.86532
MBTPS2	-0.651442		5.85914
DNAJC27-AS1	4.15395		5.85815
CTDSPL	1.16611		5.84895
RBM47	0.501983		5.84895
UBE3A	-0.545426		5.84314
NOSTRIN	-0.619017		5.84226
SUSD4	1.97483		5.83652
NORAD	-0.478345		5.83412
EML4	0.634655		5.8313
DAB2IP	0.519308		5.83041
ABCA2	-0.460487		5.82509
PTGES2-AS1	1.90717		5.82423
NBPF11	-0.633536		5.80832
SUCLG2	0.55697		5.80743
NOL10	-0.720184		5.80309
BTN3A2	0.65797		5.79155
NUP50	-0.531381		5.78916
MAP2K3	-0.520832		5.78908
KTN1	0.439336		5.78318
HIP1R	0.59852		5.7804
CDC6	-0.64911		5.77481
PLA2R1	0.910966		5.77066
AIFM2	-0.506618		5.76778
RNF19A	-0.529654		5.76741
FOSL2	-0.430205		5.76741
GTF3A	-0.640316		5.75276
WWC1	0.515362		5.73926
TMED7	-0.526607		5.73896
SEPP1	3.01483		5.73437
HADHA	0.387696		5.73318
ZBTB7A	-0.462651		5.71789
PSMA5	-0.402409		5.71677
PREX1	-0.618216		5.70641
MIF	-0.422517		5.70641
ACHE	-0.493417		5.70558
LDLR	-0.518222		5.69346
PHLDA1	-0.431384		5.69346
PTGS2	-1.23621		5.69206
SIK2	-0.540088		5.69187
PSMB7	-0.425679		5.68995
GOLPH3	0.428991		5.68192
RP11-21L23.2	-0.862096		5.66649
ASAP3	1.77434		5.66383
DDX21	-0.547197		5.65104
LCLAT1	0.744601		5.64477
SLC6A8	-0.410157		5.63575
EFEMP1	2.91864		5.62659
CCPG1	0.372172		5.62659
FZD10-AS1	-1.08968		5.62614
TRIM15	1.23216		5.6192
DOK4	-0.4244		5.61027
EREG	-0.580393		5.60941
ZNF117	0.636371		5.59359
CYP2C9	0.769309		5.59286
SUSD6	0.576941		5.58784
LFNG	-0.522459		5.58458
SYVN1	-0.549756		5.58458
KLHL3	-1.51978		5.56776
PPP1R13L	1.12521		5.56015
CDH24	0.641422		5.55432
FAM177B	-1.61048		5.54253
CTBP2	-0.546117		5.54219
RASAL1	-0.761503		5.54012
PIN1	-0.519961		5.54012
CYP2S1	-0.532402		5.54012
UBA5	-0.551356		5.53732
C19orf24	-0.612196		5.53732
MLXIPL	0.661266		5.52841
NOVA1	-0.843753		5.52841
ZC3H12C	-0.710529		5.52841
NPY1R	-0.528736		5.52506
AHR	-0.577446		5.50081
RAB26	0.618106		5.49767
M6PR	0.517958		5.49343
AGPS	0.649777		5.49078
PTGFRN	0.485409		5.48707
C14orf159	1.07633		5.47576
NDUFB10	-0.493695		5.47576
MDM2	0.653492		5.46746
CPEB4	-0.574783		5.45772
TMEM19	0.875767		5.44941
AKR1C4	0.639632		5.44742
CDKN2A	0.78357		5.43873
RUVBL2	-0.490782		5.4349
PPP1R15B	-0.48208		5.42986
PDK4	-0.471606		5.42915
PLK1	0.732042		5.41774
ATP6V1G1	-0.496994		5.41649
B3GNT3	-0.634338		5.40864
PAPSS2	0.443573		5.4004
CYP21A2	4.86982		5.39373
TPM3	-0.387615		5.38838
KNDC1	0.897161		5.38696
LURAP1L	1.0309		5.38483
NUS1	-0.54854		5.37992
AC013275.2	3.94348		5.36208
PPIB	-0.396276		5.3612
BACE1	0.624731		5.35551
RPUSD1	-0.5819		5.34711
ACTB	-0.295672		5.33795
ID3	-0.448775		5.33795
MPV17L	-0.929237		5.30233
PRX	0.889305		5.29755
C6orf48	0.533412		5.29563
TSPAN9	0.699159		5.29494
TPM4	-0.494868		5.29454
SLFN5	0.724175		5.28393
PDGFC	0.955409		5.27734
TCN2	0.660678		5.25231
DHCR24	0.400623		5.25202
FOXC2	-1.00536		5.24532
VPS41	0.562196		5.24404
MUC1	1.65748		5.2437
MRPS34	-0.429115		5.23774
RP11-203J24.8	1.13481		5.23661
BAX	0.476323		5.23521
HLA-F	0.958855		5.22665
VCAN	-0.412861		5.21398
TAPBP	0.42133		5.20702
ABHD17B	-0.696249		5.20078
C5	1.61965		5.19803
BAIAP2L1	-0.444663		5.19442
USP9X	-0.466571		5.19294
TOR1AIP2	0.474096		5.18645
TNFRSF10A	-0.615743		5.17999
SAMD9	0.850048		5.15514
FAM83G	-0.473572		5.15091
TMEM173	1.61883		5.13831
EBI3	2.64525		5.13437
SIKE1	-0.778058		5.13134
CEACAM7	2.69766		5.13133
CTSA	0.389577		5.12201
KLHDC8B	0.906586		5.11458
CENPJ	0.990998		5.11166
FGL1	0.685835		5.10722
METTL7A	3.58844		5.10334
DPP4	2.05723		5.10333
C1orf116	0.640617		5.09927
ADAM12	-0.680078		5.0979
SLC25A29	0.583774		5.0979
FZD3	1.52533		5.08944
PRICKLE1	2.28527		5.08688
MCC	-0.568498		5.08124
NR2F2	0.397104		5.07615
SCARA3	0.891851		5.07474
ADGRG6	0.988411		5.07124
UGT2B11	-1.03366		5.06281
RMI2	0.95362		5.05854
RPS15	-0.381913		5.05697
IFIT1	2.04343		5.05697
SRD5A3	0.578206		5.05686
CLDN7	2.27917		5.05686
PSMD7	-0.460003		5.04243
TXN	-0.327707		5.03859
RARG	0.97761		5.03683
PI4KA	-0.443856		5.0355
MIA2	1.34219		5.03475
MGAM	1.75755		5.03475
LAMC1	0.399238		5.01695
SLC25A45	-1.20348		5.01271
LBH	0.608616		4.99406
CTD-3128G10.7	2.55987		4.98466
IDI1	-0.45822		4.98158
RPL26L1	-0.592962		4.97147
HSPG2	0.525728		4.97147
TMEM151A	-0.687423		4.97147
MUC5AC	-1.43383		4.9659
CYB5B	0.586374		4.96392
BCAS2	-0.592984		4.96392
CACYBP	-0.35131		4.9597
SLC22A18	-0.515961		4.95462
TRIM22	5.03457		4.95462
CD247	-2.46925		4.95462
KXD1	-0.503513		4.95417
CSNK1G1	0.853716		4.95388
SELK	-0.661872		4.94506
LONRF2	-0.881413		4.94041
PARP14	0.660221		4.93795
CCDC85B	-0.614202		4.93357
ENTPD6	-0.367661		4.9281
SGPL1	0.719285		4.92523
UBE2M	-0.450692		4.9129
NOL6	-0.433396		4.9129
TNRC6C-AS1	0.936228		4.91181
BFAR	0.514358		4.89475
YWHAQ	-0.333552		4.89062
SHC2	0.796935		4.88441
COPS6	-0.377011		4.87926
LSMEM2	-1.14631		4.85753
FAM171A1	0.670866		4.85185
PSMF1	-0.441393		4.84832
ARHGDIA	-0.389026		4.84232
CYP4F3	-0.400379		4.839
DUOX2	1.15244		4.83756
FGFRL1	-0.514627		4.83737
SESN3	-1.15121		4.83737
STRAP	-0.516746		4.82805
TRMT112	-0.566853		4.82022
NECAB3	-0.509484		4.81104
CEACAM5	-1.49012		4.80025
NCOA3	-0.473756		4.79934
RDH14	-0.623733		4.79842
EFR3B	-1.64077		4.79647
PSMD14	-0.410629		4.79414
CYP24A1	0.327904		4.78909
TPX2	0.556468		4.77854
PDCD4	0.63159		4.77422
TMEM245	-0.505463		4.76673
NDUFAF2	-0.590367		4.76673
PTRF	0.521595		4.76673
HIST2H2BE	-0.555083		4.76412
GNB1	-0.459791		4.76168
TMEM233	-1.69788		4.75692
APOBEC3B	0.693121		4.75065
HNRNPAB	-0.309718		4.74887
ANPEP	3.19314		4.74559
PSMB8-AS1	1.70635		4.7314
TFF3	-0.849112		4.73025
GPR157	-0.844285		4.73025
NANS	-0.396733		4.72264
RAB7B	2.21138		4.71743
IMP4	-0.458189		4.71613
PHLDB2	-0.631086		4.7156
RAD23B	-0.380038		4.71143
ACAP1	2.3396		4.704
WARS	-0.479973		4.70235
STX1A	-0.515752		4.70036
CTDSP2	0.697174		4.69763
ATG101	-0.432156		4.69394
UBE2V2	-0.545872		4.69394
SLCO4A1	-0.813939		4.69372
SLC37A4	0.711967		4.69372
LDOC1L	-0.58207		4.68638
C1GALT1	-0.52965		4.68585
C3orf80	-1.24668		4.6814
ADRA1D	1.10686		4.68088
HAO1	0.824484		4.67891
KIAA1683	-1.10441		4.67614
ADCY3	0.83712		4.67453
CDKN2B	0.802616		4.66528
CYB5A	0.455692		4.65773
GTSE1	1.07007		4.65512
EIF5	-0.382642		4.62956
SRRM2	0.341105		4.62947
ATP6V1F	-0.420288		4.62856
KIF16B	-0.681954		4.62167
NR5A2	1.47193		4.62153
SEC13	-0.477018		4.61722
KCNS3	0.49432		4.61722
ARL4C	-0.659601		4.61722
CHMP2A	-0.413641		4.60682
LINC00963	-0.403499		4.602
RPL8	-0.308097		4.59814
RARS	-0.490508		4.59769
SLC25A20	0.700918		4.59724
SERPINB1	-0.393732		4.58353
POLH	0.88773		4.58174
TRIB2	0.792676		4.57846
CDK18	1.93574		4.57846
SLC38A1	-0.466253		4.57585
CLIC1	-0.341527		4.57319
SLC39A1	0.351071		4.57008
PHPT1	-0.380334		4.55666
SLC51B	-1.6045		4.55124
VSTM2L	0.537562		4.54805
KLHL24	0.710533		4.53202
JAZF1	0.843381		4.52831
AKR1C8P	1.15499		4.52281
RASAL2	0.732506		4.52234
MSN	0.35713		4.52075
EDA2R	0.686236		4.51805
CRACR2B	-0.496463		4.50943
PYROXD2	0.813861		4.50522
BAP1	-0.480132		4.50068
AURKAIP1	-0.443677		4.50068
PDE8A	0.522678		4.48786
IDH2	0.396869		4.48362
KIAA1161	0.474089		4.47622
KANSL1L	1.13141		4.47187
TBC1D7	-0.833083		4.47077
DHTKD1	-0.501544		4.47077
PAM16	-0.618993		4.46594
EGR1	0.967662		4.44561
GALM	0.667409		4.44314
TTC19	0.611221		4.44179
TLR1	1.51297		4.43454
SCRN1	0.474018		4.42595
PSMD11	-0.508483		4.42368
CTGF	1.33804		4.42366
SCAMP1	-0.535298		4.42215
MUC2	-3.1266		4.41646
RP11-462L8.1	-0.93996		4.40955
CCDC78	-0.705827		4.40741
SDF2L1	-0.462865		4.40026
TNS3	0.362466		4.39905
LANCL1	-0.542353		4.39661
C10orf10	2.13892		4.39049
DNMBP	0.699128		4.38748
SPINK1	1.13538		4.38428
PRRG4	2.43339		4.37972
TMEM63B	-0.409254		4.37797
TPD52	-0.512084		4.37676
BICDL1	-0.741815		4.3701
LRRC59	-0.339963		4.36918
BUB1B	0.737429		4.36825
CHMP7	-0.442969		4.36341
KAZN	-0.825275		4.3588
BAIAP2-AS1	0.656081		4.35152
VSTM4	-0.931928		4.34883
CNTN1	-0.575069		4.34731
PSME3	-0.425725		4.34295
PES1	-0.376166		4.33974
SESN2	0.833018		4.33698
TUBG1	-0.478248		4.30522
MNT	-0.478738		4.29941
TUBA1B	-0.329948		4.2973
C19orf53	-0.43264		4.2968
MAGED1	-0.30688		4.29598
GRPEL1	-0.613745		4.2921
PFDN2	-0.441153		4.29098
HR	0.652062		4.28324
C16orf13	-0.599578		4.28089
LPCAT3	0.673564		4.2798
VAC14-AS1	-1.25263		4.2798
ELK3	0.797031		4.27688
RPL36	-0.333563		4.27688
EIF3C	-0.328385		4.27206
TMED10	-0.334644		4.27198
RAP2B	0.453271		4.2638
FLYWCH2	-0.612005		4.26351
TRIM56	0.384313		4.26066
TRIOBP	-0.412249		4.25875
CES3	3.75512		4.25767
FGD4	0.843381		4.25586
HIST2H2BF	-0.809397		4.25127
KIAA0101	0.641413		4.2317
MICU1	-0.430001		4.22781
UCK2	-0.395924		4.22504
SLC19A1	-0.801883				4.22466
FLNB-AS1	-1.81559		4.22466
ANK3	2.3742		4.21626
C14orf132	3.3604		4.20965
PC	-0.506114		4.20406
SERPINA1	1.97397		4.20406
PRSS12	0.919099		4.2016
HDAC8	-0.632928		4.19614
APPBP2	-0.732413		4.19579
ZNF136	1.45865		4.19455
WDR18	-0.554053		4.19385
DNM2	0.331871		4.19385
ARF6	-0.379184		4.19248
RIMBP3	-0.815627		4.191
STIM2	-0.568887		4.18936
EPS8	-0.435527		4.18293
NAXE	-0.361159		4.18159
LINC00847	0.747049		4.17612
TFPI	0.403939		4.1751
MCCC1	0.535699		4.17491
CD24	0.320114		4.17088
HIBCH	0.527611		4.16844
PLPP6	-0.612987		4.16017
PAGR1	-0.522932		4.15864
IL13RA1	0.536237		4.15839
BHLHE40	-0.400696		4.15483
SRA1	-0.482883		4.15381
MRPL14	-0.517065		4.15129
NCAPD2	0.702674		4.13307
SGK2	0.719606		4.12551
UBQLN1	-0.385528		4.12551
C17orf107	-0.771117		4.12087
SEC16A	-0.425374		4.11932
TMSB10	-0.320196		4.11825
SPRYD4	0.702337		4.11825
ACOT13	-0.524568		4.11527
CALU	-0.394221		4.11347
NAPRT	-0.460417		4.11326
PDE4D	-0.639184		4.10635
RAB4B	-0.70871		4.10525
NCDN	-0.495182		4.09764
SS18	0.556896		4.09613
BTN3A1	0.619651		4.09036
ANLN	0.532397		4.08334
COA4	-0.438858		4.08293
HMGN5	0.64613		4.08244
RCAN1	0.918608		4.08073
GCDH	-0.58824		4.07959
MRPL17	-0.547988		4.07483
KDM5A	-0.804872		4.07458
MUC12	-0.926151		4.06972
CYCS	-0.37875		4.06944
LINC01426	-0.967161		4.06795
CCDC124	-0.399391		4.06283
TRIM45	0.914745		4.05782
MRPL21	-0.673347		4.05728
SRPRB	-0.422532		4.0556
PSMB6	-0.381227		4.05381
YAP1	0.537099		4.05166
PRR26	-0.859198		4.04882
PLSCR1	0.611757		4.04882
QPRT	1.20446		4.04232
AGTRAP	-0.471403		4.04039
TAB2	0.593604		4.0384
RAP2C	0.590957		4.03268
HSPB8	0.533522		4.02901
C19orf33	-0.498729		4.02224
POLR3D	-0.473669		4.02147
IGSF8	-0.46598		4.01964
STAM	-0.659134		4.01867
SEC11C	-0.469076		4.01796
EBNA1BP2	-0.439129		4.01771
HSPB1	0.372938		4.01682
DPYD	1.18571		4.01478
APH1A	0.374543		4.0071
DDX41	-0.421372		4.00521
PFDN6	-0.550583		4.00489
FZD8	-0.454602		4.00351
ARRDC2	-0.431226		4.00324
LIPA	0.420957		4.00078
ARHGAP11B	1.35589		3.99869
GIPR	0.867826		3.99745
DDB2	0.670895		3.99454
ARCN1	-0.434257		3.99085
ACVR1C	-1.18855		3.98864
TMC5	0.537119		3.98345
ADIPOR1	-0.383964		3.98225
ERAP2	1.58988		3.98221
ELOVL2	0.503483		3.98021
ADGRV1	1.94317		3.97814
SLC17A4	2.62614		3.97778
CCDC85A	3.35294		3.97185
VEGFC	-0.620017		3.96582
TNXB	1.73787		3.96187
TACC2	-0.451124		3.96163
PLIN5	1.18299		3.96007
IDH3A	-0.568496		3.95721
HSPBP1	-0.498756		3.95237
MAGI1	0.804262		3.95205
TP53	0.551377		3.94707
SFN	-0.72683		3.94198
TAGLN2	-0.295307		3.94157
FKBP4	-0.322012		3.94
PTPRK	0.478549		3.93958
SLC26A6	-0.599075		3.93158
PMVK	-0.384285		3.92331
BLCAP	0.474674		3.92331
ZFP90	0.669027		3.91785
DRG1	-0.434611		3.91773
CYB5R3	-0.316729		3.91458
EMD	-0.481957		3.91237
RGL1	1.37386		3.91237
EIF1	-0.296823		3.91059
LINC00589	-2.45651		3.90821
SUCLA2	-0.509861		3.90246
CHDH	0.948591		3.9012
DTX4	0.584547		3.90032
HDGF	0.270641		3.89934
CCDC74B	1.69919		3.89874
C1QTNF5	0.795379		3.88992
NPL	0.583943		3.88397
RHEB	-0.362759		3.88248
GLDC	-0.428961		3.88114
MEGF6	1.29451		3.874
SRP19	-0.437019		3.87379
RSPO3	-1.19367		3.86853
PLSCR4	2.03338		3.86833
NR4A3	-1.48621		3.86833
MMD	1.46998		3.86696
LYNX1	0.792065		3.86315
AGFG2	0.443684		3.86151
SPDEF	-0.476762		3.86012
DNAJA4	-0.573439		3.8558
ARL1	-0.554633		3.8542
EIF2S1	-0.47714		3.8542
ANKRD52	0.332122		3.85249
IMPA2	-0.395661		3.84959
LACTB	0.557451		3.84726
SRP9	0.365869		3.83639
COL4A2	-0.342291		3.8332
SLC8B1	0.471245		3.83303
PHKA1	-0.569902		3.82635
RNPS1	-0.373966		3.82602
GSTM2	1.05446		3.82471
YIF1B	-0.598708		3.82468
KIF1C	0.515906		3.82452
TNFSF13	0.753666		3.81945
PAF1	-0.425534		3.81866
NCLN	-0.405406		3.81866
PDAP1	-0.372329		3.81727
KDELR3	-0.425151		3.8172
MYBBP1A	-0.471348		3.80454
NIPAL3	0.719827		3.80001
MAD1L1	-0.552002		3.80001
COG5	-0.658804		3.79938
PPARD	-0.521527		3.794
RAB37	-0.557633		3.78988
A4GALT	-0.517524		3.78941
SYT12	-0.452054		3.78235
GAN	-0.628668		3.78161
SGMS1	-0.56093		3.77946
ARHGEF16	-0.632656		3.77851
INTS1	-0.438597		3.77714
CAP2	0.545938		3.77585
RNF24	0.628273		3.77559
FADS1	-0.408924		3.77216
TMEM213	-1.05289		3.76955
PPP1R14D	3.13972		3.76676
DCDC1	0.954252		3.75818
TMCO3	0.454826		3.7577
PEAR1	-0.485607		3.75711
ZNF224	0.64813		3.75711
CYP39A1	1.10466		3.757
SLC13A5	2.82954		3.75559
B3GNT9	-0.366134		3.75541
ARSE	0.38134		3.754
TPGS1	-0.568204		3.75134
BPNT1	0.46614		3.74987
NETO2	-0.441264		3.74934
UBR3	0.506566		3.74176
ADO	-0.537232		3.73956
CDH6	1.08886		3.73293
AIMP2	-0.515756				3.7325
CABIN1	0.641682		3.73192
DLGAP4	-0.703803		3.72892
CTSO	1.25795		3.72743
CREB3L3	1.07762		3.72459
TCF7L2	-0.63351		3.72443
PPP1R3B	0.754354		3.72443
SERPINB8	-0.816612		3.72198
SFXN5	0.547028		3.71372
TIMM17B	-0.391116		3.71302
ILDR2	2.33295		3.71302
NKX1-2	-2.57097		3.70774
NME3	-0.506955		3.70633
BPIFB1	0.556823		3.70461
SHH	0.457396		3.70276
SCNN1A	1.90404		3.70196
SULT1A1	0.594149		3.69669
TUBA1C	-0.404399		3.69624
KLC2	-0.492727		3.69624
ENGASE	0.482811		3.6931
BRIX1	-0.452599		3.69246
SIDT2	-0.740031		3.68508
LINC00472	2.69012		3.68201
ASPM	0.541668		3.68114
KIFC3	0.291147		3.67994
TEAD2	0.542743		3.67976
CFLAR	0.332439		3.67897
ATG16L1	-0.619772		3.67552
MARK4	-0.522645		3.67413
POLRMT	-0.358081		3.67301
S100A13	-0.450929		3.67301
KIAA0319	-1.02246		3.66621
TOP1	-0.362319		3.66593
LRRC75B	0.769255		3.66581
LAMB2	0.574945		3.66561
CCT4	-0.302345		3.66258
TMEM159	0.974891		3.65992
COL6A3	-2.334		3.65992
MFSD3	-0.594724		3.6514
TBC1D2	-0.374179		3.6484
LITAF	0.432929		3.63931
EFNA1	0.684298		3.63595
GPX1	-0.351719		3.63595
APOBEC3C	0.612468		3.63586
CYTH3	0.84949		3.63381
SEMA4B	0.460408		3.62933
CCNB1	0.447303		3.62746
PKP4	0.486994		3.62746
TSC2	-0.32169		3.62362
CARHSP1	0.416979		3.6214
ZNF189	0.496919		3.61915
MAFF	-0.514205		3.61915
PCDHA12	0.631427		3.61678
IFITM2	0.433586		3.61536
STK24	-0.396941		3.61369
VPS37A	-0.554763		3.61369
COPZ1	-0.400511		3.61351
PLEKHN1	-1.24471		3.61213
ACLY	-0.311255		3.61044
ARHGEF40	0.398232		3.61036
ZNF593	-0.684349		3.60909
IL17RB	1.20146		3.60599
TMF1	-0.592164		3.60486
CDHR2	-0.50017		3.60417
NRCAM	0.535603		3.60333
IL17RC	0.628208		3.60284
ZNF302	0.748651		3.59486
DCTN5	-0.477806		3.59285
TNFRSF10B	0.323565		3.59089
DDX19B	-0.498061		3.59037
CDK14	-0.484308		3.58376
ZNF503	-0.441199		3.57872
HAL	-0.932631		3.57827
POLR2F	-0.422124		3.57584
BRMS1	-0.505857		3.5757
SLC35G2	-0.568293		3.57454
PLCD3	0.529035		3.57334
DHDDS	-0.488797		3.57147
IKBIP	0.455658		3.57098
ISYNA1	0.600696		3.56847
HERC6	1.25153		3.56703
ACO2	-0.309593		3.56388
SERPINA5	1.16665		3.56056
NDEL1	-0.470105		3.56023
STX3	0.750931		3.55663
CNBP	-0.361293		3.55228
METRN	-0.329172		3.54701
SYTL2	0.847043		3.54701
HK1	-0.580745		3.54296
NOMO2	-0.328475		3.54217
NAA50	-0.511459		3.54136
SLC25A22	-0.766252		3.54124
MOGAT1	1.52526		3.53955
PRODH2	0.541927		3.53937
P4HTM	-0.481845		3.53623
DMXL2	0.708986		3.53359
GLTPD2	-0.637818		3.53352
CCNH	-0.470035		3.53008
PDPR	0.397152		3.52667
CRIP3	3.79744		3.52234
MRPS23	-0.469975		3.52164
DPH1	0.518499		3.51764
PLEKHG2	-0.460908		3.51158
HAUS4	0.61516		3.50441
ADRM1	-0.382177		3.50199
RP11-806H10.4	-3.17139		3.49732
LINC00857	-0.827337		3.49588
OPTN	0.399055		3.49473
DERL1	-0.457626		3.4918
CERS6	-0.414774		3.48671
LAMB1	0.321228		3.48394
UBE2N	-0.526376		3.48306
HSP90B1	-0.288826		3.47984
TPD52L1	0.452794		3.47327
ADCY7	-0.608924		3.47074
AGBL5	0.664892		3.4704
IWS1	-0.44406		3.46828
MCM4	0.548714		3.46712
ARAP3	0.514434		3.46674
EMC4	-0.358545		3.46482
ZPR1	-0.707484		3.4643
KANK1	-0.39394		3.46238
KIAA0408	0.925897		3.46163
MOCS2	-0.336637		3.45636
HDAC5	0.58331		3.45352
CD276	0.382136		3.45127
C1orf115	0.455599		3.45127
JMJD4	-0.464714		3.45015
RAB3A	-1.1453		3.45015
MCRIP2	-0.428296		3.45015
DCTPP1	0.412799		3.45015
PGD	-0.273126		3.44745
FUS	-0.325094		3.44608
PSMD3	-0.332776		3.4434
NUP85	0.588888		3.4434
PRKAR1B	-0.668616		3.43943
RBMS2	0.555848		3.43673
ZNF558	0.630084		3.43446
RAD23A	-0.409122		3.43247
HFE	0.603551		3.4254
SLC25A11	-0.575332		3.42255
FOSL1	-0.671915		3.42245
LINC01021	0.94077		3.42041
ARHGEF17	0.691091		3.41902
CDC37	-0.33109		3.41494
INSR	0.551438		3.41398
MYH14	-0.318891		3.41207
GNPDA1	0.473844		3.41207
ARF4	-0.387777		3.41038
HMMR	0.713682		3.41009
ZC3H12A	-0.355086		3.41009
VTCN1	6.07399		3.40845
WDR6	0.448748		3.40558
LINC00342	0.993242		3.40067
TPPP	-0.549358		3.40016
HEXIM1	0.350167		3.39894
GMPPB	-0.442323		3.39554
PLA2G6	-0.484461		3.39459
LINC00294	0.955679		3.39459
CTNND2	-0.603509		3.39287
PAQR3	-0.66072		3.39117
SCYL1	-0.405528		3.39033
HLX	0.915428		3.38953
PARD6A	-1.03373		3.38614
ZNF266	0.550791		3.38121
FAM53B	0.492276		3.37183
UAP1L1	0.752122		3.37052
COPG1	-0.341366		3.35874
ZNF385A	0.544278		3.35825
RP11-81A22.4	-1.02677		3.35719
KLHL30	0.774406		3.35433
AMOTL1	-0.529193		3.35215
CREG1	-0.273793		3.3474
C5orf66	-1.19216		3.3474
TMEM238	-1.35292		3.3474
ALCAM	0.289962		3.34691
AP001046.5	-1.48926		3.343
PDLIM5	-0.385474		3.34148
NT5E	0.388337		3.33979
BMP3	1.18437		3.33979
CCT7	-0.286962		3.33935
SPON2	2.06274		3.33935
STARD13	1.30357		3.33818
COL7A1	-0.39668		3.33604
EXOC5	-0.451472		3.33342
FNDC3A	-0.408916		3.32878
SEMA5A	0.531946		3.3258
HNF4A	-0.412745		3.32477
STBD1	0.488239		3.32469
HHIPL2	-0.861901		3.32336
HNRNPUL2-BSCL2	-0.467705		3.32254
TRAF5	0.837665		3.32244
DEPDC1	0.821027		3.3212
LYPD1	-0.266897		3.3212
CDC34	-0.392298		3.3191
SOX7	-0.650988		3.31529
DCTN6	-0.39673		3.31378
TCN1	-0.339502		3.31027
RBPMS	-0.318238		3.30802
RPS2	-0.26441		3.30729
SLC7A11	-0.410726		3.30729
FAT1	-0.42518		3.30644
FAM177A1	-0.435803		3.30644
NUPR1	4.6554		3.30542
NUMB	0.46746		3.29396
FAM89A	1.00384		3.29311
TSPAN1	2.04159		3.29121
YWHAG	-0.323981		3.28923
TMEM141	-0.5201		3.28923
IL6R	0.523965		3.28789
TCTN1	0.67855		3.28378
RABEPK	-0.530975		3.28227
UBE2K	-0.464184		3.28045
TMED3	-0.343654		3.28011
SMAP2	-0.476972		3.27531
GPD1	0.443425		3.27488
FAM161B	0.961622		3.26759
TLR3	2.90169		3.25321
DPY19L4	0.651238		3.25177
CLCN7	0.340214		3.24956
MPHOSPH6	-0.534671		3.24956
CATSPERB	-0.652399		3.24664
RACGAP1	0.77362		3.24617
IMP3	-0.388417		3.24111
CHTF18	-0.445671		3.23847
CENPV	-0.463527		3.23839
NDUFB4	-0.344146		3.23684
C6orf223	-0.908136		3.23581
ERLEC1	-0.38176		3.23345
MYC	-0.373504		3.23249
PELO	-0.341261		3.23054
POP7	-0.529362		3.23023
MOB4	-0.562626		3.22882
UQCRC2	0.42576		3.22579
TMEM248	-0.425139		3.22524
BRI3BP	0.409086		3.22395
JTB	-0.316545		3.2228
FAM131C	-0.955875		3.21993
ZC3H7A	0.400289		3.21948
DENND3	-0.403594		3.21713
NPTX2	-0.35678		3.21282
TIMM17A	-0.318775		3.21172
HIST1H1C	-0.461984		3.2085
SRP72	-0.388377		3.20759
TANGO6	-0.779701		3.20612
RAC1	0.290218		3.20565
LARP1	-0.404772		3.20366
PROM2	-3.78105		3.19368
SEC23A	-0.498517		3.19224
CAMK2N1	-0.368955		3.18864
PRDX2	-0.288603		3.18864
BYSL	-0.491505		3.18658
ITPK1	-0.38624		3.18581
UBB	-0.252312		3.18404
PSMD4	-0.293676		3.18233
F2RL1	0.441183		3.18233
ZNF608	0.732624		3.18189
PLA2G4C	0.731772		3.17751
ZNF704	0.926295		3.17524
YIPF5	-0.425877		3.17398
ABHD6	-0.816699		3.17286
TCIRG1	-0.346572		3.17203
PRKCE	-0.862298		3.17203
CTTN	0.299589		3.17097
HYAL2	-0.464574		3.16983
MARVELD2	0.877805		3.16966
PITRM1	-0.383222		3.16516
PRELID1	-0.325833		3.16291
RP13-870H17.3	-1.14736		3.16133
FAM105A	0.831929		3.15443
SSSCA1	-0.849782		3.15359
HAGHL	-0.480926		3.15175
OLFML2B	1.72964		3.14459
MYO10	-0.396083		3.14354
NFKBIA	0.459798		3.14059
CYP51A1	-0.340004		3.13817
RRP7A	-0.379781		3.13776
MBTPS1	0.335221		3.13775
GPR137B	0.837428		3.13691
ATP6V1E1	-0.343275		3.13691
RNF7	0.433533		3.13402
ARID3B	-1.0212		3.1339
RBKS	-0.542899		3.13256
RASEF	-0.376422		3.12826
ALAS1	-0.318222		3.12756
DUSP3	0.352114		3.12756
ASPHD1	-0.356182		3.12635
GOLGA2	-0.361164		3.12304
SEC11A	0.353189		3.1227
MTMR6	0.71395		3.12176
ST6GAL1	1.65048		3.12015
OCLN	1.84181		3.11777
CBR3	-0.810303		3.1136
CDC42EP3	-0.824295		3.11233
CCT5	-0.271507		3.10713
ZDHHC23	1.2219		3.10639
KIF2C	0.773562		3.10159
NKIRAS2	-0.410667		3.10035
CDC42EP1	-0.297681		3.09324
GALE	-0.371362		3.09135
CEBPD	0.545519		3.09076
COL5A3	1.16835		3.08968
SRRM3	0.884226		3.08696
MTMR9	-0.68015		3.08634
PICK1	-0.515244		3.08321
DUSP10	0.847646		3.08321
RAB11FIP5	0.353775		3.08177
SDPR	2.60677		3.08163
KCNH5	-1.7152		3.08063
ALDH7A1	0.385753		3.07897
FBXO17	0.795607		3.07888
NDUFAB1	-0.430271		3.07774
BAMBI	-0.302804		3.07678
CTSL	-0.300015		3.0719
RBM18	-0.595487		3.07004
GPRASP2	0.675594		3.0669
QARS	0.371681		3.0664
RAPGEF1	-0.435249		3.06602
PLPP5	-0.448097		3.06272
RIF1	-0.498709		3.06066
SUFU	0.620044		3.06047
CCNJL	-0.639405		3.05978
PHC1	0.757805		3.05612
AC007743.1	5.09491		3.05205
NELFE	-0.421337		3.04753
ZFP36L2	-0.295961		3.04636
GLT8D1	0.769062		3.04154
CASP5	6.39954		3.03973
PRKCDBP	-0.569699		3.03973
MSLNL	-1.11945		3.03828
MMP15	0.263754		3.03452
SVIL	-0.337346		3.03438
F7	-0.563523		3.03303
APEX1	0.279552		3.03238
MICALL1	0.464904		3.02183
ARFGAP1	-0.322518		3.02109
CBX8	-0.730126		3.01893
PSMB1	-0.380118		3.01754
LIMA1	0.862645		3.00977
THSD4	-0.378595		3.00762
S100A6	-0.248132		3.00594
RRP1	-0.478053		2.99777
TSPAN3	0.284046		2.99434
FAM45A	0.570482		2.99054
SPTY2D1	-0.722371		2.98629
FOXA3	-1.00625		2.98473
RHOG	0.715333		2.98369
ZHX2	-0.370136		2.98227
NTMT1	-0.444374		2.97844
SCARB1	0.399565		2.97646
TOMM40	-0.368416		2.97528
CNR1	0.621346		2.97364
PPP1R11	-0.380912		2.97138
PIEZO2	1.8889		2.97112
CXCL2	0.503413		2.97072
KREMEN1	0.693749		2.96964
LBR	0.443655		2.96774
TSC22D4	0.38022		2.96763
SEMA4D	-0.469776		2.96618
ZC3H15	-0.356949		2.96563
CHD4	0.462707		2.9642
AFAP1L2	3.5376		2.96109
MYH10	-0.661603		2.95711
C4B-AS1	3.31248		2.95661
GADD45GIP1	-0.440597		2.95362
SQSTM1	-0.283739		2.95192
USP30	0.787712		2.94946
STOML1	0.607151		2.94872
NR1D1	0.631547		2.94638
PMAIP1	-0.668076		2.9398
CRIM1	0.496355		2.9398
CAPN15	-0.36953		2.93869
FAM157C	-5.22524		2.93415
TSPAN13	-0.350133		2.93122
BMP4	3.95994		2.92646
IPO9	0.377266		2.92255
COX8A	-0.333505		2.91985
SECISBP2	-0.427283		2.91985
RP11-631N16.2	1.00722		2.91985
LINC00672	0.956966		2.91985
PDHX	-0.61665		2.91933
EXOC4	0.436477		2.91906
PPP1R18	0.435755		2.916
SAR1A	-0.38789		2.91445
MSLN	-0.383728		2.91044
VASN	0.438741		2.91001
CDK19	0.880271		2.90193
ZSWIM6	-0.456698		2.89566
ORC6	0.660194		2.89412
ABCA10	1.68526		2.89412
KLF11	1.00574		2.89352
RP11-343C2.11	-0.356762		2.88857
CHPF2	-0.354569		2.88767
DYNLRB1	-0.415224		2.88631
COLGALT1	-0.285293		2.88591
GUF1	-0.696613		2.88283
ARL6IP1	0.302422		2.88053
NOLC1	-0.358646		2.88045
RP3-395M20.8	-0.677185		2.8794
NBPF14	0.515187		2.8791
ITM2B	0.315297		2.87826
SRGAP2	0.705543		2.87826
STMND1	1.51512		2.87785
GPCPD1	-0.542255		2.87651
MCM5	0.397508		2.87479
HLA-C	0.331725		2.87479
DBNL	-0.318405		2.87353
TMEM229B	0.938409		2.8703
CKS1B	0.491197		2.86699
TIA1	0.435164		2.86619
RPS6KA3	0.464802		2.86208
UBL4A	-0.364267		2.86132
TRIM66	-0.890393		2.85857
PSMA6	-0.314763		2.85746
SPATA2L	-0.585186		2.85738
TMED4	-0.324734		2.85705
EIF3G	-0.299577		2.8561
SRC	-0.262479		2.85599
ASF1A	-0.494872		2.85528
PRDX5	-0.258055		2.85507
MYO6	0.408681		2.85447
MRPL41	-0.318509		2.85423
OTUD6B	0.803119		2.85071
MASP1	-0.341354		2.8498
U73166.2	-1.54757		2.8498
S100A1	1.09602		2.84948
NDUFS6	-0.327171		2.8468
MMS19	0.545446		2.84559
BPGM	0.584884		2.844
SREBF1	-0.373835		2.84168
SLC26A2	0.703544		2.84168
AR	0.373654		2.84142
XRN1	0.814863		2.84042
ARNTL	-0.834374		2.84026
TRAK1	-0.371301		2.83846
KRT86	-1.10456		2.83783
RP11-228B15.4	1.03367		2.83783
SCYL3	0.59672		2.8375
CWC15	-0.538068		2.83701
C1QBP	-0.293046		2.83642
IL6	-0.96061		2.83642
CFHR1	1.36762		2.83551
MAPK1IP1L	-0.485484		2.83313
GTF2A1	-0.580383		2.83031
SP100	0.49668		2.82759
NFIB	1.06456		2.82643
TXNDC11	-0.399764		2.82556
TRPM4	0.455489		2.82344
C4A-AS1	3.18565		2.82344
FOSB	-0.842068		2.82212
PLCB1	-0.48223		2.82192
RP11-184M15.2	-2.27578		2.81959
LMAN1	-0.373016		2.81889
GPN3	-0.627642		2.81773
ATP6V1H	-0.483927		2.81497
PPP6R1	-0.304587		2.81359
ORAI3	0.537921		2.81359
ERICH4	2.56268		2.81359
CDCA7L	0.558523		2.81354
NHS	0.965567		2.80982
ADAM15	0.330669		2.8084
ARL6IP4	-0.375823		2.80694
RP11-295K3.1	0.352237		2.80381
CBX7	0.403467		2.80264
COL4A4	-0.44574		2.79683
MRPL58	-0.588931		2.79532
SCIN	1.35883		2.79504
MRPL36	-0.481757		2.78675
PTTG1IP	0.280878		2.78569
DOK5	1.03657		2.78199
UHRF2	-0.397679		2.78199
TBL2	-0.31913		2.7814
IDH1	0.276019		2.7814
TBCE	-0.416873		2.77871
FAM127A	-0.344568		2.77862
STIP1	-0.280941		2.77271
GLRX2	-0.548428		2.77219
RAB15	0.402522		2.76797
EIF6	-0.302182		2.76797
RAB13	0.292953		2.76733
COX20	-0.373276		2.76733
ARNTL2	-0.811145		2.76577
MAPRE3	-0.440818		2.76401
ANKRD13A	0.543076		2.76255
EIF3J	-0.338407		2.76255
EIF2D	0.385876		2.76003
KIAA0141	0.386994		2.75891
FAHD2B	-0.440163		2.7577
NDST1	-0.3783		2.75697
HNRNPM	0.243023		2.75697
MTG2	-0.397239		2.75697
PPIP5K2	-0.489226		2.75697
MERTK	1.98952		2.75697
PPAN	-0.371235		2.75685
PNISR	0.377314		2.74932
GLUD1	0.400198		2.74832
DESI1	-0.34925		2.745
DNAJA1	-0.252279		2.74456
COA6	-0.361218		2.74456
CST1	-0.263455		2.74456
AP000439.3	-1.46866		2.744
C1RL	0.601589		2.74245
CCDC113	-0.641823		2.73992
EMC6	-0.480878		2.73992
ADCY6	0.480264		2.73696
MYO1B	0.391805		2.73688
RAI14	0.614738		2.73251
BCAM	0.388908		2.72978
SPAG9	-0.419362		2.72533
CCDC43	-0.514913		2.72533
ITGB3	1.31654		2.72491
FAM136A	-0.398699		2.7243
METTL14	0.888569		2.72404
DNAJA2	-0.298911		2.71937
ENO1	-0.237665		2.71775
HYAL4	2.49176		2.71775
NNT	0.298719		2.71775
TLE4	-0.657969		2.71481
SDHAP1	0.644561		2.70973
ZBTB41	0.440389		2.70906
ECE2	-0.592449		2.70726
MRPL53	-0.40047		2.70617
DNAJC6	-0.761372		2.70592
UBE4A	-0.440491		2.70461
ATP6V0A2	-0.785162		2.70391
RPS16	-0.238252		2.70178
SERPINH1	0.315489		2.69955
PKP3	-0.56814		2.69808
ALPK1	0.637005		2.69591
RRAS	0.557341		2.69591
SEC23B	-0.374732		2.69467
CCDC22	-0.412025		2.69467
HPS1	0.484411		2.69467
STXBP5-AS1	-2.00038		2.69467
SEZ6L2	-0.307605		2.6937
DAP	-0.282299		2.69045
TXNL1	-0.371302		2.689
BCL3	-0.3081		2.68839
SF3B2	-0.305751		2.68839
FGF19	-1.47564		2.68591
RBM8A	-0.309157		2.6803
AC005077.14	-1.00715		2.67931
PRPF4	-0.420106		2.6785
ZCCHC10	-0.614888		2.67474
DUS1L	-0.342141		2.6713
ZBTB7C	-0.387409		2.6713
ACTA2	1.20894		2.66961
PRPF6	-0.295626		2.66938
BIRC3	0.533073		2.66893
RP11-834C11.4	-0.406497		2.66707
PRMT1	-0.304229		2.66547
CCT2	-0.314154		2.66503
SWAP70	0.646304		2.66358
NASP	0.364523		2.66123
PPP1R3E	0.770105		2.66087
LGALS3	0.286871		2.65815
SLC43A2	0.294416		2.65815
C17orf89	-0.468915		2.65815
DNAJB5	1.16144		2.65678
PDHA1	-0.368767		2.6564
CPNE2	0.491669		2.65474
IRF7	-0.822234		2.65383
FAIM	0.835118		2.65377
CLMP	-0.509681		2.65346
XRCC2	0.803409		2.65167
MB21D2	-0.768781		2.64967
TUBB6	0.974753		2.64857
CORO7	0.547859		2.64714
MAPK11	0.818221		2.64207
NBPF12	-0.417385		2.64008
IKBKAP	0.39012		2.63997
GSAP	0.526735		2.63962
FGFR3	1.12754		2.63892
DDX39A	-0.45469		2.63512
ZNF84	0.632625		2.63241
ACSL4	0.332348		2.63194
ICAM5	1.67937		2.63171
ATXN1	0.887099		2.62728
TEF	0.690016		2.62728
LCOR	0.764137		2.62506
PON2	0.276093		2.62115
ERN1	0.619943		2.62094
CCND3	-0.336831		2.62032
DHX30	-0.362905		2.61994
EXOSC4	-0.526844		2.61994
FBXO32	-0.537985		2.61838
RP11-568K15.1	0.741678		2.61724
ERLIN2	-0.37933		2.61706
STOM	0.305108		2.61615
CD79A	-0.353668		2.61416
CA2	-0.401898		2.61312
RP11-1035H13.3	0.801848		2.61312
RPL22L1	-0.384145		2.61211
FUCA1	0.415402		2.61205
CLDN2	0.233629		2.61029
B4GALNT1	-0.356648		2.61023
RGL2	0.566465		2.60869
CHMP4A	-0.37537		2.60852
COASY	0.30664		2.60243
NET1	-0.348757		2.60157
TGFB2-OT1	1.95188		2.60157
CIB1	0.282624		2.60107
RNF40	-0.393539		2.60087
NPHP3	0.60976		2.60071
MAGED2	0.283724		2.60024
TTC39C	-0.508554		2.59861
G3BP2	-0.389059		2.59818
PABPC1L	0.767525		2.5972
TTPAL	0.560763		2.59599
ARC	-1.03003		2.59526
SHPK	0.624061		2.59139
ABCA8	1.21965		2.58813
OST4	-0.331132		2.58809
ERO1B	0.554098		2.58709
FAM72C	2.15609		2.58671
LEO1	-0.373468		2.58319
CASP4	0.325826		2.58319
CHTF8	0.365889		2.58315
AP1M1	-0.317984		2.58057
HCP5	0.809243		2.58057
ZDHHC20	0.535082		2.5799
BOLA2	-0.621607		2.57979
NLRC5	0.604048		2.57935
MORF4L2	-0.251663		2.57618
ITGAL	3.13458		2.57595
PIP5KL1	1.6813		2.57251
ADGRE5	0.447647		2.57231
CLPP	-0.396214		2.56778
KIAA1211L	0.806227		2.56778
PIGK	-0.566668		2.56736
DLGAP5	0.708937		2.5648
CNN3	0.381285		2.56477
TMEM167A	-0.307609		2.56309
RASSF3	0.564512		2.56238
TAPBPL	0.888526		2.56027
[truncated: 13,989 more rows]
