# Supplementary material for: Oncogenic PKA signaling increases c-MYC protein expression through multiple targetable mechanisms
Source: eLife. 2023 Jan 24;12:e69521. doi: 10.7554/eLife.69521 (PMC9925115; doi:10.7554/eLife.69521)
Supplement: Figure 4—source data 2. [file elife-69521-fig4-data2.xlsx]

## Sheet: 4B
Pathway	log10p
TNF-alpha Signaling via NF-kB	-13.1663
mTORC1 Signaling	-12.8651
Myc Targets V1	-12.4495
Oxidative Phosphorylation	-11.9933
Glycolysis	-7.91344
Myc Targets V2	-7.864
Unfolded Protein Response	-5.81534
DNA Repair	-3.73151
G2-M Checkpoint	5.25806
Apoptosis	5.62776
TNF-alpha Signaling via NF-kB	6.89753
Coagulation	7.71563
p53 Pathway	8.79308
E2F Targets	10.9381
Interferon Alpha Response	13.4175
