# Supplementary material for: Oncogenic PKA signaling increases c-MYC protein expression through multiple targetable mechanisms
Source: eLife. 2023 Jan 24;12:e69521. doi: 10.7554/eLife.69521 (PMC9925115; doi:10.7554/eLife.69521)
Supplement: Figure 4—source data 3. [file elife-69521-fig4-data3.xlsx]

## Sheet: 4C
	ODC
siPRKACA1	-7.1542	-6.76306	-7.26555
siPRKACA2	-5.72486	-5.57345	-8.68793
siPRKACA17	-6.27679	-8.0028	-9.07197
siMYC14	-4.78349	-6.30407	-6.6154
siMYC15	-3.65261	-4.29556	-3.15654
siMYC35	-5.36338	-3.64474	-4.67984
