# Supplementary material for: Oncogenic PKA signaling increases c-MYC protein expression through multiple targetable mechanisms
Source: eLife. 2023 Jan 24;12:e69521. doi: 10.7554/eLife.69521 (PMC9925115; doi:10.7554/eLife.69521)
Supplement: Figure 4—source data 4. [file elife-69521-fig4-data4.xlsx]

## Sheet: 4D
	ODC		CCND1
Hours	Mean	SD	Mean	SD
0	2.96e-16	0.190984	0	0.039186
0.5	0.061801	0.161247	0.140536	0.071276
2	0.354868	0.148371	0.412981	0.053831
4	0.534769	0.097303	0.37665	0.090663
