# Supplementary material for: Oncogenic PKA signaling increases c-MYC protein expression through multiple targetable mechanisms
Source: eLife. 2023 Jan 24;12:e69521. doi: 10.7554/eLife.69521 (PMC9925115; doi:10.7554/eLife.69521)
Supplement: Figure 4—source data 5. [file elife-69521-fig4-data5.xlsx]

## Sheet: Figure 4E
FLX1 with siRNA
	NTC siRNA										c-MYC siRNA
Well	#1	#2	#3	#4	#5	#6	#7	#8	#9	#10	#1	#2	#3	#4	#5	#6	#7	#8	#9	#10
36:00:00	1	1	1	1	1	1	1	1	1	1	1	1	1	1	1	1	1	1	1	1
38:00:00	1.01874	1.00877	1.01533	1.0072	1.00009	1.00111	1.00002	1.00882	1.01805	1.01779	1.00591	1.00101	1.00166	0.987377	1.00628	0.994237	0.996727	0.99377	0.997634	0.997423
40:00:00	1.03022	1.01531	1.02309	1.0199	1.01288	1.0262	1.01286	1.02404	1.01961	1.01712	1.00302	0.990974	1.00242	0.999262	1.0044	0.99969	0.997411	0.999434	1.00049	0.994576
42:00:00	1.03808	1.02274	1.02622	1.02653	1.03488	1.03629	1.02966	1.03312	1.01834	1.04084	1.00615	1.00092	0.992879	0.996098	1.00659	0.996226	1.00219	1.00049	0.999713	1.00218
44:00:00	1.05578	1.02789	1.04096	1.03269	1.04904	1.04643	1.03804	1.05645	1.03285	1.0546	1.00708	1.01504	1.00467	0.994661	1.00254	1.00954	0.995743	1.00563	0.999614	1.00741
46:00:00	1.05335	1.05	1.05188	1.04525	1.06706	1.04637	1.04927	1.07004	1.03866	1.06914	1.00319	1.0195	1.01229	0.995181	1.00343	1.00074	1.00983	1.01146	1.00302	1.01461
48:00:00	1.07706	1.0608	1.05973	1.05943	1.08253	1.06934	1.06235	1.07497	1.04675	1.0869	1.00273	1.03441	1.01252	1.00793	1.01392	1.01506	1.0173	1.01311	1.01301	1.01229
50:00:00	1.07768	1.05996	1.06204	1.07379	1.09936	1.07793	1.07329	1.09471	1.06009	1.10175	1.01305	1.0293	1.01351	1.01027	1.0126	1.02063	1.01033	1.02376	1.01553	1.01794
52:00:00	1.11125	1.08715	1.07613	1.09058	1.10612	1.09023	1.09995	1.10435	1.07348	1.12286	1.02051	1.04875	1.01441	1.00376	1.01418	1.01927	1.00573	1.02577	1.01799	1.02202
54:00:00	1.10262	1.07695	1.09731	1.09116	1.11054	1.11342	1.11132	1.12072	1.08819	1.13683	1.01759	1.04049	1.01689	1.00786	1.02922	1.03072	1.00993	1.03412	1.02765	1.03137
56:00:00	1.10786	1.09329	1.11317	1.10906	1.12568	1.11447	1.11704	1.13034	1.09559	1.14371	1.01213	1.04842	1.02011	1.01465	1.02694	1.04677	1.0198	1.04328	1.03293	1.04385
58:00:00	1.11565	1.11129	1.12092	1.10988	1.13526	1.12964	1.12859	1.13674	1.11178	1.15062	1.01652	1.05234	1.02786	1.01267	1.03877	1.04319	1.0263	1.04256	1.04189	1.04099
60:00:00	1.14342	1.11613	1.13276	1.1233	1.1512	1.14518	1.14907	1.15891	1.14104	1.17245	1.02986	1.05363	1.02344	1.01976	1.0373	1.04882	1.03044	1.04705	1.04199	1.04655
62:00:00	1.14497	1.13413	1.14078	1.13547	1.15426	1.14955	1.14491	1.16843	1.13275	1.17587	1.03014	1.0546	1.03301	1.03183	1.03941	1.04338	1.04045	1.05187	1.04458	1.05722
64:00:00	1.1612	1.15623	1.16218	1.15679	1.16156	1.16603	1.15787	1.18402	1.16464	1.18998	1.03728	1.06925	1.0252	1.03752	1.04772	1.05607	1.04389	1.05953	1.05372	1.06397
66:00:00	1.18096	1.14782	1.18121	1.16378	1.18104	1.16867	1.15431	1.19327	1.16432	1.20228	1.03409	1.07541	1.03445	1.04564	1.06135	1.06132	1.0527	1.06817	1.06827	1.08093
68:00:00	1.18214	1.17024	1.1913	1.17884	1.19207	1.17483	1.16693	1.20342	1.16846	1.20846	1.04302	1.07502	1.04888	1.0563	1.06742	1.06673	1.05582	1.07815	1.07381	1.08098
70:00:00	1.1926	1.17357	1.19203	1.20652	1.19741	1.2001	1.17925	1.21295	1.17793	1.21635	1.04653	1.07876	1.05814	1.05943	1.07309	1.07465	1.05617	1.07908	1.07662	1.08113
72:00:00	1.2014	1.18806	1.22603	1.19566	1.21017	1.21607	1.20278	1.23337	1.20076	1.2348	1.05664	1.0797	1.0529	1.06322	1.07864	1.09086	1.05821	1.08516	1.08151	1.08455
74:00:00	1.21702	1.20207	1.23581	1.22448	1.22666	1.2109	1.21239	1.24338	1.2074	1.24936	1.07142	1.09388	1.06123	1.06665	1.07974	1.09307	1.06578	1.08051	1.0809	1.08475
76:00:00	1.23113	1.21412	1.23335	1.22583	1.23714	1.22475	1.23193	1.26146	1.21902	1.27472	1.06316	1.09817	1.05744	1.06834	1.08612	1.09562	1.06593	1.08374	1.08871	1.10409
78:00:00	1.25099	1.22165	1.24966	1.22044	1.26525	1.23182	1.2313	1.26641	1.24591	1.26836	1.07975	1.09093	1.06837	1.08137	1.07928	1.10066	1.06657	1.08961	1.10342	1.09615
80:00:00	1.23738	1.23947	1.2616	1.25222	1.27166	1.24599	1.24571	1.27299	1.25587	1.27801	1.08011	1.10274	1.09084	1.10604	1.09515	1.11032	1.07771	1.09972	1.09911	1.09813
82:00:00	1.25482	1.25159	1.28134	1.27373	1.28492	1.26534	1.2862	1.30801	1.28488	1.30961	1.09511	1.13785	1.09632	1.11297	1.11446	1.13574	1.1082	1.11928	1.11728	1.14147
84:00:00	1.29627	1.27118	1.3078	1.29388	1.30619	1.29894	1.28233	1.31956	1.30594	1.32175	1.12706	1.13483	1.11391	1.14931	1.11734	1.16657	1.13406	1.14147	1.13706	1.15371
86:00:00	1.29722	1.28804	1.3063	1.30176	1.30315	1.27375	1.30146	1.33315	1.31426	1.33695	1.12977	1.142	1.13609	1.13906	1.11541	1.16623	1.11703	1.132	1.14402	1.16293
88:00:00	1.28109	1.27114	1.31527	1.29788	1.31542	1.29234	1.31165	1.33256	1.30745	1.34434	1.12514	1.14482	1.11683	1.12624	1.1146	1.15424	1.1276	1.12382	1.13819	1.15558
90:00:00	1.29959	1.30108	1.33193	1.33579	1.34043	1.29635	1.31075	1.34756	1.33374	1.35819	1.12435	1.12311	1.12452	1.12931	1.11371	1.15812	1.13338	1.14288	1.15058	1.17027
92:00:00	1.3291	1.31024	1.36865	1.32025	1.32296	1.33124	1.32816	1.35162	1.33816	1.37018	1.1206	1.14767	1.10212	1.12496	1.12925	1.16515	1.13315	1.14382	1.13543	1.16636
94:00:00	1.32916	1.30981	1.3429	1.30444	1.33035	1.32529	1.3248	1.3537	1.35941	1.37274	1.1225	1.15902	1.11595	1.14232	1.12712	1.15426	1.13378	1.13687	1.14795	1.17894
96:00:00	1.32763	1.31897	1.34101	1.32326	1.34601	1.33684	1.34338	1.36528	1.37077	1.38082	1.12258	1.15204	1.12086	1.12056	1.14076	1.1603	1.13151	1.13262	1.13933	1.18007
98:00:00	1.36895	1.34972	1.35532	1.32212	1.36758	1.34215	1.34477	1.38117	1.37927	1.38074	1.1223	1.15719	1.11353	1.14076	1.13714	1.16238	1.12828	1.15497	1.15861	1.19682
100:00:00	1.35714	1.35125	1.3801	1.33692	1.35469	1.34626	1.34797	1.38033	1.37649	1.38313	1.13131	1.16285	1.13324	1.13886	1.14504	1.14737	1.13167	1.14622	1.16676	1.19248
102:00:00	1.35774	1.35654	1.37567	1.35125	1.36488	1.35724	1.36262	1.37958	1.4028	1.3982	1.12751	1.15832	1.12815	1.14448	1.14828	1.15781	1.13216	1.14755	1.16979	1.19089
104:00:00	1.37719	1.36429	1.38314	1.35035	1.38531	1.36845	1.35568	1.39017	1.40324	1.41103	1.13116	1.17559	1.12289	1.13985	1.14087	1.16122	1.13375	1.15387	1.16869	1.19904
106:00:00	1.39415	1.38953	1.40712	1.37578	1.41407	1.37528	1.36559	1.39811	1.41617	1.42122	1.13778	1.18099	1.13564	1.14343	1.15219	1.16755	1.14193	1.14447	1.18153	1.20355
108:00:00	1.37729	1.40084	1.4095	1.37734	1.41739	1.38194	1.38451	1.40491	1.42485	1.431	1.12715	1.19431	1.12186	1.12874	1.15132	1.16719	1.15074	1.16327	1.19001	1.20242
110:00:00	1.43414	1.40954	1.43491	1.39468	1.4269	1.41456	1.42199	1.43675	1.43422	1.43405	1.16599	1.20545	1.15124	1.15727	1.17684	1.19476	1.16126	1.17376	1.19173	1.21885
112:00:00	1.43369	1.39818	1.41813	1.40434	1.45535	1.41787	1.41917	1.4417	1.43812	1.43629	1.16288	1.21979	1.14518	1.14281	1.18117	1.19296	1.15907	1.17619	1.19525	1.22493
114:00:00	1.44877	1.47088	1.44651	1.40928	1.4671	1.43328	1.45461	1.45812	1.45905	1.46005	1.17039	1.22226	1.17451	1.15399	1.19896	1.19461	1.17058	1.19227	1.19739	1.22608
116:00:00	1.44476	1.41962	1.42859	1.43358	1.47553	1.4358	1.45525	1.47184	1.46195	1.46602	1.18228	1.24478	1.14866	1.16268	1.19012	1.20871	1.16527	1.19448	1.20808	1.22657
118:00:00	1.44461	1.44768	1.46106	1.41227	1.47699	1.45219	1.44958	1.48308	1.46626	1.48544	1.1731	1.22105	1.16267	1.15773	1.19596	1.22011	1.17659	1.19708	1.21008	1.2354
120:00:00	1.46576	1.42818	1.4753	1.43893	1.47535	1.45254	1.46874	1.4872	1.46766	1.49378	1.18387	1.24549	1.16515	1.15463	1.20437	1.21766	1.17169	1.20239	1.2076	1.2311
122:00:00	1.47286	1.46793	1.46098	1.43123	1.49785	1.4593	1.46514	1.49267	1.47643	1.50601	1.19013	1.25573	1.17411	1.17367	1.21329	1.21148	1.17836	1.20685	1.20925	1.25192
124:00:00	1.45152	1.47479	1.48229	1.49415	1.50642	1.46996	1.48188	1.51078	1.48057	1.51864	1.20706	1.24226	1.17904	1.17918	1.21354	1.22004	1.18437	1.21498	1.21771	1.25626
126:00:00	1.50879	1.49534	1.4832	1.48493	1.53469	1.46968	1.48629	1.51885	1.49219	1.517	1.1946	1.2509	1.19605	1.17304	1.20056	1.23017	1.19141	1.2121	1.22315	1.2546
128:00:00	1.49621	1.49016	1.51946	1.47825	1.52581	1.49919	1.49638	1.53509	1.51936	1.52363	1.2094	1.24559	1.18653	1.20285	1.21111	1.22798	1.19474	1.22592	1.22011	1.25008
130:00:00	1.49784	1.50035	1.51182	1.4926	1.54235	1.51049	1.51948	1.52791	1.52183	1.55141	1.21485	1.26039	1.19331	1.20396	1.21798	1.2357	1.20628	1.22665	1.23417	1.26096
132:00:00	1.5254	1.49265	1.5163	1.48472	1.55504	1.50772	1.51813	1.53886	1.54615	1.54898	1.22798	1.2618	1.21546	1.20008	1.24888	1.25073	1.20809	1.22295	1.24076	1.26121
134:00:00	1.50468	1.50438	1.53781	1.51163	1.57547	1.5172	1.53332	1.54645	1.56003	1.56692	1.22239	1.26258	1.20632	1.21021	1.23518	1.24598	1.2229	1.22877	1.24427	1.25705
136:00:00	1.52854	1.57049	1.52225	1.52155	1.55619	1.51254	1.54079	1.56165	1.55393	1.57671	1.24036	1.2642	1.23173	1.21044	1.2608	1.24746	1.21483	1.23368	1.23383	1.27612
138:00:00	1.53727	1.53361	1.55026	1.53132	1.57865	1.5285	1.56325	1.56541	1.57113	1.59651	1.24051	1.28594	1.20524	1.21575	1.25413	1.25498	1.22479	1.23489	1.23452	1.26688
140:00:00	1.5468	1.5373	1.54996	1.56363	1.59365	1.56213	1.56866	1.57419	1.57476	1.59654	1.23878	1.26992	1.20124	1.21843	1.26989	1.26362	1.21609	1.23112	1.25136	1.27996
142:00:00	1.56569	1.55716	1.55821	1.55629	1.62279	1.58817	1.5737	1.57818	1.5901	1.61782	1.26542	1.30126	1.23615	1.22486	1.26368	1.28702	1.22658	1.24032	1.25057	1.27928
144:00:00	1.60362	1.55037	1.54606	1.54004	1.59861	1.6076	1.57732	1.59283	1.59918	1.64244	1.28925	1.2974	1.22106	1.23956	1.27754	1.28458	1.24364	1.26129	1.25723	1.28798
146:00:00	1.60815	1.55633	1.5742	1.58695	1.62473	1.60356	1.59602	1.61376	1.60182	1.62333	1.26381	1.30585	1.23926	1.24474	1.29314	1.29198	1.24125	1.26431	1.27598	1.30813
148:00:00	1.59187	1.59106	1.59289	1.5865	1.61544	1.61592	1.58212	1.63289	1.6491	1.65119	1.27267	1.3014	1.25516	1.25562	1.27365	1.28696	1.25035	1.27129	1.27227	1.29341
150:00:00	1.61589	1.62311	1.59747	1.60481	1.62932	1.6554	1.60801	1.63822	1.62524	1.66047	1.28434	1.30083	1.25249	1.25502	1.29631	1.29587	1.2557	1.28052	1.2827	1.30301
152:00:00	1.61168	1.62729	1.62233	1.61082	1.65861	1.61669	1.59561	1.65713	1.63978	1.6786	1.29739	1.32134	1.24549	1.26784	1.28456	1.30676	1.25821	1.27315	1.27486	1.3072
154:00:00	1.60374	1.6277	1.61809	1.60311	1.66772	1.6835	1.61119	1.67041	1.65438	1.67421	1.2883	1.31848	1.252	1.27627	1.31451	1.31323	1.26088	1.29083	1.28857	1.32268
156:00:00	1.62687	1.62746	1.62793	1.6116	1.66159	1.67146	1.63262	1.68272	1.65737	1.67995	1.28586	1.33778	1.27656	1.27422	1.3194	1.32499	1.27664	1.29677	1.29648	1.32239
