# Supplementary material for: Oncogenic PKA signaling increases c-MYC protein expression through multiple targetable mechanisms
Source: eLife. 2023 Jan 24;12:e69521. doi: 10.7554/eLife.69521 (PMC9925115; doi:10.7554/eLife.69521)
Supplement: Figure 4—source data 7. [file elife-69521-fig4-data7.xlsx]

## Sheet: 4F
	AUC Log2FC vs NTC
siNTC	-0.0406004	0.044306	-0.0049615
siPRKACA	-0.417217	-0.496367	-0.583673	-0.372655
siMYC	-0.0634078	-0.180491	-0.278776
