# Supplementary material for: Oncogenic PKA signaling increases c-MYC protein expression through multiple targetable mechanisms
Source: eLife. 2023 Jan 24;12:e69521. doi: 10.7554/eLife.69521 (PMC9925115; doi:10.7554/eLife.69521)
Supplement: Figure 4—source data 8. [file elife-69521-fig4-data8.xlsx]

## Sheet: Figure 4G
	MYC no Dox						MYC +Dox
Well	#1	#2	#3	#4	#5	#6	#1	#2	#3	#4	#5	#6
0:00:00	1	1	1	1	1	1	1	1	1	1	1	1
2:00:00	1.01529	1.01604	1.01863	1.00944	1.01104	1.03247	1.02109	1.02057	1.01647	1.00767	1.02024	1.005
4:00:00	1.03383	1.02643	1.02371	1.01537	1.02062	1.056	1.02461	1.03281	1.02955	1.01479	1.03399	1.02
6:00:00	1.0409	1.02618	1.0251	1.02609	1.02236	1.06483	1.04336	1.04399	1.04009	1.01457	1.04025	1.04171
8:00:00	1.04431	1.03238	1.03519	1.03891	1.02322	1.0662	1.04647	1.06183	1.05607	1.03557	1.05769	1.04819
10:00:00	1.04661	1.02359	1.02787	1.03189	1.02474	1.06141	1.06483	1.06506	1.06645	1.04365	1.06663	1.06248
12:00:00	1.04508	1.03125	1.03436	1.03475	1.03095	1.0696	1.08051	1.08403	1.08651	1.05734	1.08696	1.07818
14:00:00	1.04673	1.03958	1.03913	1.0416	1.04252	1.06941	1.08923	1.09483	1.1048	1.07166	1.10027	1.09583
16:00:00	1.04217	1.03372	1.03886	1.03027	1.03868	1.08828	1.11133	1.11005	1.11034	1.0772	1.1227	1.11436
18:00:00	1.03837	1.04106	1.03147	1.03664	1.04198	1.08204	1.11595	1.12577	1.13186	1.09197	1.13379	1.1328
20:00:00	1.04124	1.04681	1.04118	1.03933	1.03446	1.0807	1.13558	1.1448	1.14734	1.10815	1.14822	1.15887
22:00:00	1.03955	1.05204	1.03328	1.04129	1.03686	1.084	1.16199	1.17607	1.16333	1.127	1.15712	1.16696
24:00:00	1.04632	1.0462	1.03984	1.03928	1.03768	1.08034	1.18513	1.19663	1.19978	1.15183	1.17936	1.19862
26:00:00	1.0377	1.04482	1.03849	1.03942	1.04143	1.07924	1.18971	1.20501	1.19816	1.15829	1.20577	1.20605
28:00:00	1.03819	1.04831	1.03535	1.04215	1.04644	1.07909	1.21659	1.2258	1.2149	1.16838	1.19597	1.21729
30:00:00	1.0422	1.05267	1.03357	1.04435	1.03696	1.07935	1.2201	1.24268	1.24087	1.17654	1.21048	1.21745
32:00:00	1.04281	1.04299	1.03341	1.03922	1.03362	1.08033	1.23246	1.24582	1.22678	1.18468	1.21842	1.23264
34:00:00	1.03952	1.03734	1.02416	1.02939	1.02722	1.06255	1.22955	1.24646	1.23153	1.19992	1.2201	1.23789
36:00:00	1.0462	1.03171	1.02853	1.02779	1.02489	1.07768	1.23845	1.25393	1.23867	1.21106	1.23844	1.24385
38:00:00	1.04242	1.02845	1.02747	1.03331	1.02414	1.06184	1.24385	1.25762	1.24458	1.22128	1.24947	1.25483
40:00:00	1.04354	1.02842	1.03092	1.02408	1.02591	1.06245	1.25115	1.25907	1.2518	1.23512	1.2593	1.2709
42:00:00	1.04958	1.02655	1.03111	1.02396	1.025	1.06977	1.28055	1.28343	1.27431	1.23634	1.27802	1.29413
44:00:00	1.04931	1.03924	1.03218	1.03273	1.03742	1.06458	1.2819	1.29074	1.29876	1.25048	1.29311	1.31901
46:00:00	1.05605	1.04196	1.02995	1.04121	1.04167	1.06936	1.298	1.30343	1.30466	1.26862	1.31389	1.32462
48:00:00	1.06126	1.05255	1.04588	1.03658	1.04836	1.07668	1.30787	1.33659	1.33144	1.27319	1.33181	1.33472
50:00:00	1.06468	1.04577	1.04812	1.04723	1.04608	1.07444	1.33454	1.35254	1.33346	1.29622	1.33782	1.36511
52:00:00	1.07667	1.06497	1.06677	1.04968	1.05459	1.09077	1.36017	1.35941	1.36305	1.30258	1.36464	1.37267
54:00:00	1.0813	1.05642	1.07766	1.05044	1.05084	1.09169	1.37923	1.3667	1.37834	1.32686	1.37018	1.3928
56:00:00	1.0844	1.07225	1.07844	1.06167	1.06353	1.10393	1.38682	1.38692	1.39947	1.34579	1.38376	1.42104
58:00:00	1.09491	1.07072	1.07459	1.05768	1.07608	1.09381	1.40628	1.39739	1.40392	1.35878	1.3917	1.43605
60:00:00	1.10336	1.07834	1.07651	1.07277	1.08508	1.10974	1.42761	1.40056	1.42816	1.37853	1.40145	1.45476
62:00:00	1.10455	1.08707	1.07917	1.07436	1.0914	1.10222	1.448	1.43936	1.44145	1.37837	1.41714	1.46359
64:00:00	1.10688	1.09484	1.08364	1.08493	1.09983	1.14851	1.464	1.45773	1.45697	1.41149	1.432	1.47623
66:00:00	1.11639	1.09594	1.08613	1.08113	1.10339	1.14122	1.47504	1.44578	1.4859	1.41639	1.44263	1.49035
68:00:00	1.12633	1.1015	1.09631	1.09225	1.11079	1.14459	1.48181	1.49393	1.49803	1.43671	1.45513	1.51703
70:00:00	1.13745	1.1066	1.09939	1.08867	1.1211	1.16235	1.51466	1.4919	1.49916	1.46689	1.47682	1.51309
72:00:00	1.14114	1.1104	1.105	1.09138	1.12884	1.14923	1.51504	1.50061	1.52951	1.46786	1.49098	1.54141
74:00:00	1.15934	1.11364	1.11809	1.10174	1.1225	1.17348	1.52464	1.50745	1.52178	1.47313	1.51297	1.54328
76:00:00	1.16411	1.1286	1.1282	1.12105	1.13603	1.18677	1.53553	1.53381	1.52196	1.50628	1.52934	1.57178
78:00:00	1.17535	1.14158	1.13029	1.12688	1.13874	1.18087	1.5607	1.54572	1.54664	1.52722	1.5414	1.56553
80:00:00	1.18164	1.12555	1.1353	1.13342	1.14523	1.20653	1.56526	1.55569	1.55745	1.54749	1.54249	1.58848
82:00:00	1.18099	1.14887	1.12421	1.13391	1.15509	1.19746	1.56926	1.57162	1.56812	1.54349	1.54563	1.58966
84:00:00	1.19323	1.1637	1.15332	1.14184	1.15549	1.18417	1.58852	1.56744	1.55522	1.55763	1.56753	1.60135
86:00:00	1.19977	1.16677	1.15818	1.15393	1.16406	1.21376	1.58974	1.57792	1.57371	1.58773	1.58679	1.60501
88:00:00	1.19454	1.16439	1.15663	1.15625	1.1855	1.20206	1.61252	1.57239	1.57489	1.56466	1.58205	1.61578
90:00:00	1.20933	1.17458	1.15576	1.16126	1.19185	1.20761	1.61121	1.58826	1.58849	1.59617	1.59628	1.62991
92:00:00	1.21877	1.17221	1.16378	1.16835	1.18389	1.23881	1.61172	1.58721	1.58379	1.62455	1.59106	1.62602
94:00:00	1.21137	1.19058	1.17829	1.17987	1.19146	1.25357	1.61435	1.60141	1.5938	1.61886	1.60101	1.62483
96:00:00	1.22539	1.19717	1.18534	1.19089	1.21094	1.25386	1.61665	1.59907	1.59968	1.6056	1.59252	1.64387
98:00:00	1.23053	1.20889	1.19402	1.18987	1.21653	1.26567	1.6244	1.60235	1.60724	1.6309	1.59751	1.63648
100:00:00	1.24397	1.21409	1.20873	1.20119	1.22577	1.25854	1.61996	1.5982	1.60442	1.64404	1.61364	1.65106
102:00:00	1.26576	1.22709	1.21221	1.19976	1.22276	1.26819	1.62935	1.58413	1.60306	1.6694	1.61673	1.64616
104:00:00	1.25187	1.23807	1.22986	1.21595	1.24447	1.2729	1.64398	1.59298	1.62712	1.67954	1.62541	1.66626
106:00:00	1.27837	1.24002	1.23287	1.22285	1.23069	1.27269	1.63458	1.59607	1.61977	1.6722	1.61206	1.66687
108:00:00	1.27704	1.24312	1.23532	1.23631	1.25535	1.28443	1.64417	1.58372	1.61755	1.64673	1.62536	1.66021
110:00:00	1.2906	1.25779	1.24064	1.24594	1.2587	1.2873	1.64582	1.63018	1.62777	1.65279	1.62259	1.65563
112:00:00	1.29526	1.26593	1.26066	1.25181	1.281	1.30461	1.64473	1.62747	1.61739	1.68431	1.62295	1.66754
114:00:00	1.31141	1.27007	1.27903	1.26202	1.30367	1.31647	1.65053	1.62058	1.62687	1.68505	1.61135	1.68129
116:00:00	1.34317	1.31574	1.30478	1.30266	1.32737	1.37066	1.70345	1.68296	1.64426	1.71704	1.64209	1.70149
118:00:00	1.34731	1.32312	1.29917	1.29851	1.32978	1.35866	1.69695	1.67106	1.63787	1.69553	1.63355	1.68921
120:00:00	1.35603	1.32112	1.32522	1.29666	1.3362	1.39076	1.69545	1.67476	1.64384	1.70641	1.62002	1.67809
122:00:00	1.36665	1.33824	1.31889	1.32066	1.34766	1.39787	1.68942	1.67049	1.62602	1.72129	1.6245	1.69423
124:00:00	1.3745	1.3421	1.32506	1.33041	1.3541	1.38957	1.72221	1.68459	1.64989	1.68926	1.62209	1.68498
126:00:00	1.3872	1.36333	1.34045	1.3347	1.34143	1.40216	1.70198	1.68834	1.64877	1.72744	1.61195	1.66933
128:00:00	1.40072	1.36469	1.35346	1.34833	1.36629	1.40511	1.71884	1.7029	1.64995	1.72528	1.62765	1.70117
130:00:00	1.39757	1.37275	1.37905	1.37467	1.37458	1.4226	1.70693	1.69406	1.64286	1.70909	1.62236	1.69873
132:00:00	1.40111	1.38957	1.38486	1.39439	1.38566	1.40756	1.72563	1.7048	1.66434	1.70741	1.62123	1.70498
134:00:00	1.43052	1.40483	1.38427	1.38978	1.38773	1.44366	1.74291	1.68889	1.65641	1.71763	1.60195	1.70115
136:00:00	1.45949	1.43076	1.43187	1.4358	1.44274	1.46829	1.7582	1.74039	1.71363	1.7618	1.65139	1.73938
138:00:00	1.47819	1.45441	1.41496	1.43649	1.44776	1.46387	1.7581	1.71125	1.6979	1.75462	1.62591	1.72367
140:00:00	1.49382	1.46806	1.44012	1.44263	1.44068	1.51249	1.75763	1.71381	1.67159	1.72282	1.61955	1.69561
142:00:00	1.50798	1.46845	1.44034	1.44478	1.45298	1.50452	1.74186	1.70665	1.68732	1.76575	1.59963	1.69862
144:00:00	1.51458	1.48478	1.47479	1.46743	1.45884	1.51081	1.77087	1.6925	1.6893	1.7797	1.59104	1.68839
146:00:00	1.51972	1.47402	1.50329	1.47185	1.47054	1.52236	1.75937	1.70673	1.6805	1.81608	1.58471	1.70976
148:00:00	1.51973	1.48023	1.49464	1.47924	1.49044	1.55439	1.73099	1.70887	1.67183	1.80088	1.57943	1.72083
150:00:00	1.53597	1.5007	1.502	1.47785	1.50559	1.56095	1.7416	1.71189	1.67848	1.79229	1.58552	1.70599
152:00:00	1.55548	1.50921	1.51804	1.49284	1.51312	1.57442	1.73273	1.71481	1.67716	1.76263	1.59065	1.71457
154:00:00	1.54769	1.54746	1.52288	1.50927	1.53762	1.56249	1.74619	1.70323	1.67135	1.7495	1.57599	1.7131
156:00:00	1.62022	1.57985	1.61205	1.57671	1.58648	1.62804	1.82569	1.77234	1.75075	1.84476	1.64952	1.80071
