# Supplementary material for: Oncogenic PKA signaling increases c-MYC protein expression through multiple targetable mechanisms
Source: eLife. 2023 Jan 24;12:e69521. doi: 10.7554/eLife.69521 (PMC9925115; doi:10.7554/eLife.69521)
Supplement: Figure 5—figure supplement 1—source data 1. [file elife-69521-fig5-figsupp1-data1.xlsx]

## Sheet: Figure S2A
Colo741 AURKA Inhibitors Sensitivity
Drug Conc [nM, power of 10]	Aurora A Inhibitor I (Type II)									AZD1152 (Type II)									CD532 (CD Disruptor)									Hesperadin (Type I)									MLN-8237 (CD Disruptor)									SNS-314 (Type II)
Replicate	#1	#1	#1	#2	#2	#2	#3	#3	#3	#1	#1	#1	#2	#2	#2	#3	#3	#3	#1	#1	#1	#2	#2	#2	#3	#3	#3	#1	#1	#1	#2	#2	#2	#3	#3	#3	#1	#1	#1	#2	#2	#2	#3	#3	#3	#1	#1	#1	#2
4	1.02595	0.943814	1.1493	0.926592	0.951009	1.04827	0.906303	0.999478	1.01298	0.984772	1.04731	1.02277	0.831096	0.838745	0.860374	0.826529	0.799433	0.737516	0.00118672	0.00140533	0.0123326	0.00177663	0.00140277	0.0124684	0.00115697	0.00178113	0.0116649	1.05945	1.02919	1.07615	1.02015	1.12707	1.04031	0.797622	0.900278	0.935259	1.01217	1.01333	0.903378	0.794935	0.829606	0.880509	0.818257	0.80995	0.780275	0.748148	0.8036	0.843111	0.817463
3.52288	1.11992	1.2261	1.10793	0.989542	1.12078	1.06305	1.03605	1.13925	1.12086	1.0409	1.08958	1.01229	0.820239	0.853979	0.833573	0.835417	0.873237	0.876135	0.00257644	0.00279505	0.0146154	0.00284069	0.00330722	0.0141332	0.00334152	0.00449849	0.0143175	1.00244	1.07277	1.08792	1.13464	1.14487	1.08654	1.04032	1.07392	1.0867	0.904654	0.94002	1.01121	0.801218	0.848906	0.840799	0.864547	0.855547	0.809221	1.11515	1.1488	1.23371	1.03441
3.04576	1.03478	1.1565	1.10833	0.979866	1.09184	1.10829	1.03222	1.12728	1.13382	1.03173	1.00212	0.988678	0.784421	0.815497	0.797374	0.828818	0.824708	0.773047	0.0144156	0.0153087	0.0233129	0.0172902	0.0168045	0.0325641	0.0162509	0.0162737	0.0208598	1.01843	1.09547	1.04246	1.06645	1.15065	1.1691	1.00637	1.08146	1.12302	0.538866	0.503617	0.542124	0.434809	0.437951	0.43368	0.411709	0.397566	0.375056	1.09598	1.24796	1.26114	0.986726
2.56864	1.12988	1.22714	1.12168	0.94038	1.10976	1.11297	1.02844	1.14024	1.18842	0.968047	1.03949	0.91809	0.887719	0.852112	0.907992	0.910138	0.907906	0.8029	0.392699	0.344906	0.401797	0.287217	0.281983	0.335017	0.425378	0.396233	0.425644	0.968576	1.12049	1.22081	1.02759	1.13717	1.15914	0.966843	1.02395	1.12876	0.62749	0.626742	0.601286	0.452923	0.436841	0.451025	0.626003	0.536585	0.508669	1.13771	1.1856	1.20767	0.986992
2.09151	1.06215	1.18624	1.11585	0.972358	1.13377	1.13905	1.06732	1.15021	1.14012	1.03354	1.06088	0.988287	1.0772	1.02834	1.06523	1.04805	1.0024	0.959022	0.751215	0.71897	0.751305	0.577463	0.604343	0.733439	0.714077	0.796385	0.748877	1.12804	1.12063	1.10811	1.06125	1.15386	1.05602	0.959178	1.05359	1.11268	1.03494	0.978831	0.949328	0.829396	0.860907	0.859103	0.989237	0.997281	0.900453	1.09845	1.09205	1.13291	0.878979
1.61439	1.26589	1.08301	1.09629	1.00474	1.08931	1.13196	1.03757	1.1409	1.16246	1.09493	1.03977	1.11902	1.10415	1.10609	1.10482	1.14214	1.10449	0.789608	0.969606	0.9169	0.950716	0.837353	0.996879	1.05077	0.939945	1.0539	1.03334	1.03517	1.01187	1.17023	1.12576	1.16536	1.16155	1.03067	1.12664	1.11982	1.16053	1.09661	1.06839	0.985384	1.11815	1.08693	1.07918	1.08225	0.979581	1.1308	1.12353	1.20434	0.908003
1.13727	0.97753	1.14368	1.11881	0.870569	1.04078	1.08305	1.05632	1.11654	1.05759	1.13682	1.08378	1.05596	1.13557	1.16202	1.13902	1.11872	1.14564	1.09516	0.974922	1.0138	1.02693	0.944855	1.0272	1.11627	1.02359	1.19089	1.19318	1.04183	1.10213	1.04705	1.11365	1.08586	1.12152	0.988304	1.04539	1.15751	1.0246	0.987751	1.06444	1.00271	1.16018	1.21031	1.1329	1.04163	1.0011	1.14611	1.20385	1.34272	0.988387
0.660151	1.04284	1.10779	1.08663	0.965174	1.06664	1.10812	1.00511	1.10619	1.12306	1.07111	1.07575	1.17831	0.947728	1.08372	1.11608	1.22191	1.1087	1.06923	1.03163	0.986324	1.04404	0.983813	1.09451	1.13448	1.04595	1.14088	1.15533	1.0405	1.00851	1.046	0.98086	1.13649	1.21707	0.924252	1.09952	1.06191	1.15547	1.10596	1.0403	1.04562	1.15138	1.14289	1.06006	1.02456	0.999584	1.12793	1.17305	1.30647	1.06103
0.18303	1.01565	1.04944	1.124	0.976144	1.05145	1.0935	1.0833	1.02968	1.07472	1.06338	1.0108	1.02249	0.961259	1.13346	1.11503	1.06667	1.1123	1.07779	1.01579	0.957951	1.02991	0.971642	1.1053	1.13354	1.05637	1.20155	1.09146	1.01128	0.998762	0.985281	1.02171	1.05098	1.0324	0.975751	1.08512	1.10591	1.07923	0.977634	1.0215	1.0532	1.09346	1.06736	1.11755	1.03426	1.03927	1.08761	1.18717	1.14806	1.14417
[truncated: 14 more columns]
