# Supplementary material for: Oncogenic PKA signaling increases c-MYC protein expression through multiple targetable mechanisms
Source: eLife. 2023 Jan 24;12:e69521. doi: 10.7554/eLife.69521 (PMC9925115; doi:10.7554/eLife.69521)
Supplement: Figure 5—source data 2. [file elife-69521-fig5-data2.xlsx]

## Sheet: 5B
	log2fc	not significant	significant	AURKA	GSK-3	MEK	PI3K/mTOR	RTK
PF-04691502	0.604668		1.54306
ALK-IN-1	-1.40842		1.96766
Crizotinib (PF-02341066)	-0.70259		2.89669
Phenformin HCl	-0.05689		2.35713
AZ20	0.700776		2.66147
KU-55933 (ATM Kinase Inhibitor)	0.32924		1.53902
MK-8745	-0.73777			2.52589
MK-5108 (VX-689)	-0.79531			2.41952
Alisertib (MLN8237)	-0.90327			1.54909
Torkinib (PP242)	0.611453		1.67278
Ibrutinib (PCI-32765)	-2.13809		2.74219
Milciclib (PHA-848125)	0.640041		1.85103
AZD5438	0.631657		2.12149
BMS-265246	0.485604							1.94572
Flavopiridol (Alvocidib)	0.251316		1.57384
PHA-767491	0.179094		1.47402
PF-477736	0.689062		1.32517
Tivantinib (ARQ 197)	0.768178		1.62961
BMS-754807	-1.22782		1.76908
PP121	0.36258							1.91049
OSI-420	-0.76261							3.42118
Sapitinib (AZD8931)	-0.74528							2.75815
Afatinib (BIBW2992)	-1.65985							1.54113
Genistein	0.125512							1.78139
PF-562271	0.427824		2.13701
Nintedanib (BIBF 1120)	-4.27341							1.76755
R406	-0.35301		2.20948
Tideglusib	1.00662				1.40513
TWS119	-0.47789				1.86333
CHIR-98014	-0.48959				1.46665
AG-1024	0.779752							1.85657
TPCA-1	-0.89026		2.71114
Tofacitinib (CP-690550) Citrate	0.379893		1.35276
AZD1480	-1.57893		2.57167
U0126-EtOH	0.517905					1.7692
PD0325901	-1.039					2.26789
Selumetinib (AZD6244)	-1.04808					2.63928
PD318088	-1.0562					3.54855
Binimetinib (MEK162, ARRY-162, ARRY-438162)	-1.08877					3.52719
TAK-733	-1.30121					2.17502
Pimasertib (AS-703026)	-1.69733					1.39812
AZD8055	1.54537						2.14245
WYE-125132 (WYE-132)	1.4819						3.00759
OSI-027	0.812125						1.31839
WYE-354	0.709807						2.39328
Vistusertib (AZD2014)	0.675149						2.67707
KU-0063794	0.463011						1.62381
Temsirolimus (CCI-779, NSC 683864)	0.456519						1.84418
Zotarolimus(ABT-578)	0.358348						1.3377
VX-745	2.06374		1.69581
TAK-715	0.387		1.83997
PF-3758309	0.871377		1.89488
PIK-93	1.61698						3.5897
Buparlisib (BKM120, NVP-BKM120)	0.841492						3.35762
VS-5584 (SB2343)	0.679186						1.54109
HS-173	0.663056						2.49955
ZSTK474	0.434887						2.35695
AS-252424	-0.64934						1.71871
ZM 336372	0.402222		1.95567
Vemurafenib (PLX4032, RG7204)	0.336406		2.15847
PLX-4720	0.333251		1.44832
Dabrafenib (GSK2118436)	0.263498		1.7479
EHop-016	0.807639		1.68431
Thiazovivin	0.590055		3.2237
GSK429286A	0.417839		1.67401
PF-4708671	-1.54734		2.6549
Fostamatinib (R788)	-0.76042		1.30404
Apatinib	0.496637							1.86391
Semaxanib (SU5416)	0.256291							1.85088
Motesanib Diphosphate (AMG-706)	0.325828							1.85655
CCT128930	0.655325	0.371057
Ipatasertib (GDC-0068)	0.540292	0.824099
Triciribine	0.473678	1.0322
MK-2206 2HCl	0.03914	0.081586
GSK690693	0.006723	0.010543
TIC10 Analogue	-0.03753	0.127646
Uprosertib (GSK2141795)	-0.05787	0.194785
A-674563	0.179713	0.528155
Honokiol	-1.37016	0.5993
PHT-427	0.131598	0.363671
AT7867	0.73384	0.679282
Ceritinib (LDK378)	0.031953	0.093043
AZD3463	0.011708	0.05952
GSK1838705A	-0.05034	0.108383
A-769662	0.133624	0.317471
AICAR (Acadesine)	-0.0733	0.437932
HTH-01-015	-0.56795	1.1707
WZ4003	-0.83071	0.655433
Schisandrin B (Sch B)	0.276756	0.744259
CGK 733	0.100972	0.173651
VE-822	-0.00074	0.027493
KU-60019	-0.05719	0.142309
Torin 2	0.605379	1.11075
PHA-680632	0.409858	0.541451
ZM 447439	0.300779	0.281123
AMG-900	0.187648	1.01313
Tozasertib (VX-680, MK-0457)	-0.00164	0.053667
Barasertib (AZD1152-HQPA)	-0.01555	0.099783
MLN8054	-0.03956	0.144093
TAK-901	-0.10192	0.111754
Hesperadin	-0.1053	1.22903
Aurora A Inhibitor I	-0.13848	1.02304
SNS-314 Mesylate	-0.15276	0.195407
Danusertib (PHA-739358)	0.427711	0.680883
KW-2449	-0.0816	0.063778
AT9283	0.115312	0.251021
JNJ-7706621	0.035061	0.095125
ENMD-2076	-0.03614	0.136253
CYC116	0.454916	1.1506
PI-103	0.495835	0.824931
Rapamycin (Sirolimus)	-0.33857	0.015205
3-Methyladenine (3-MA)	0.547819	0.448481
LY294002	0.223804	0.633807
Y-27632 2HCl	0.510789	0.550111
Fasudil (HA-1077) HCl	-0.1497	0.892384
Rebastinib (DCC-2036)	0.369654	0.948175
GNF-2	0.227261	0.198451
Nilotinib (AMN-107)	0.157066	0.006367
GZD824 Dimesylate	0.110046	0.18439
PD173955	-0.05821	0.028649
Imatinib Mesylate (STI571)	0.343116	0.03238
Dasatinib	0.180364	0.462142
Degrasyn (WP1130)	0.135118	0.430963
NVP-BHG712	0.868422	0.428971
Ponatinib (AP24534)	0.154343	0.715001
Saracatinib (AZD0530)	-1.34275	1.02033
CGI1746	0.118507	0.620743
RN486	-0.05902	0.296542
CNX-774	-0.45176	1.0584
CC-292 (AVL-292)	-0.72645	0.409531
KN-93 Phosphate	0.660293	0.72248
KN-62	0.2308	1.24319
AT7519	0.271895	0.668086
Dinaciclib (SCH727965)	0.264507	1.15689
R547	0.24749	0.913317
PHA-793887	0.243395	0.785529
Flavopiridol HCl	0.221811	0.646461
LDC000067	0.054969	0.259633
Roscovitine (Seliciclib,CYC202)	0.042563	0.113025
SNS-032 (BMS-387032)	0.039347	0.101918
BS-181 HCl	-0.06174	0.079412
TG003	-0.07403	0.795091
abemaciclib (LY2835219)	-0.09761	0.369432
NU6027	-0.21551	0.477797
LY2603618	1.28778	0.407786
CHIR-124	-0.0624	0.322173
AZD7762	-0.11968	0.147503
OSI-930	0.385955	0.606208
Dovitinib (TKI-258, CHIR-258)	0.076401	0.281827
Dovitinib (TKI-258) Dilactic Acid	-0.36428	1.05685
Amuvatinib (MP-470)	0.220119	1.1046
Masitinib (AB1010)	0.68172	0.432598
Telatinib	0.058189	0.126353
Pazopanib	0.045301	0.212909
Sunitinib Malate	-0.04302	0.083568
Tivozanib (AV-951)	-0.05326	0.053826
Pazopanib HCl (GW786034 HCl)	-0.09868	0.319672
Axitinib	-0.12479	0.323367
Ki8751	-0.23587	0.490316
Vatalanib (PTK787) 2HCl	0.167598	0.698622
SU11274	0.163373	0.154586
JNJ-38877605	0.15805	0.069889
AMG-458	0.007118	0.00768
NVP-BVU972	-0.02411	0.022984
PF-04217903	-0.17156	0.563253
PHA-665752	-0.26626	1.00439
Tepotinib (EMD 1214063)	-0.97347	1.24289
MK-2461	-0.24706	0.739257
MGCD-265	-0.23202	1.05098
Golvatinib (E7050)	0.089397	0.620106
BMS-794833	-0.00105	0.000653
Foretinib (GSK1363089)	-0.09144	0.052356
10058-F4	0.115989	0.411861
TG101209	-0.30253	0.917132
Regorafenib (BAY 73-4506)	-0.34718	0.913459
Linifanib (ABT-869)	0.385998	0.405248
BAY 11-7082	-0.11811	0.374116
Tyrphostin 9	0.375066	1.27365
WZ8040	0.044233	0.120982
AG-1478 (Tyrphostin AG-1478)	0.042153	0.00835
Pelitinib (EKB-569)	0.032715	0.094018
Dacomitinib (PF299804, PF299)	-0.02174	0.180256
WZ3146	-0.13134	0.185281
Icotinib	-0.1628	0.939044
Rociletinib (CO-1686, AVL-301)	-0.17213	0.016303
Osimertinib (AZD9291)	-0.17287	1.02904
Gefitinib (ZD1839)	-0.19849	0.675284
AST-1306	-0.5298	0.671059
Varlitinib	-0.5574	0.016448
CNX-2006	-0.83896	0.569397
PD168393	-0.93627	1.2956
WZ4002	-1.14382	1.06019
CUDC-101	-0.13108	0.306238
Lapatinib (GW-572016) Ditosylate	0.518713	0.426039
Lapatinib	0.128944	0.468662
CP-724714	0.004903	0.037115
AC480 (BMS-599626)	-0.03398	0.082056
TAK-285	-0.1732	0.366646
AEE788 (NVP-AEE788)	-0.33771	0.508373
AG-490 (Tyrphostin B42)	-0.0065	0.026443
WHI-P154	-0.27931	0.982276
Chrysophanic Acid	0.03319	0.140296
XMD8-92	0.69723	0.719963
ERK5-IN-1	0.003284	0.00524
PF-00562271	0.234842	0.896927
PF-573228	-0.04814	0.141528
TAE226 (NVP-TAE226)	-1.51167	0.569853
SSR128129E	0.092952	0.686938
AZD4547	-0.46789	0.126286
Orantinib (TSU-68, SU6668)	0.215786	0.213147
Brivanib (BMS-540215)	0.51471	0.593287
Brivanib Alaninate (BMS-582664)	0.461248	0.164455
PD173074	-0.52736	1.11065
Quizartinib (AC220)	0.2544	0.605583
AR-A014418	0.28791	0.914716
TDZD-8	0.220562	0.801962
Indirubin	0.211142	0.393582
AZD1080	0.199298	0.677346
SB216763	0.188571	0.531983
LY2090314	0.116275	0.153101
SB415286	-0.00686	0.04671
CHIR-99021 (CT99021)	-0.08542	0.115968
CHIR-99021 (CT99021) HCl	-0.11873	0.364174
BIO	-0.23196	0.511121
AZD2858	-0.52945	1.02737
CUDC-907	0.158914	0.07039
Tyrphostin AG 879	0.263823	0.683333
Mubritinib (TAK 165)	0.102081	1.13053
Linsitinib (OSI-906)	0.467844	0.67352
GSK1904529A	0.163664	0.875917
NVP-AEW541	-0.06217	0.061516
BMS-536924	-1.1728	0.72271
Bay 11-7085	0.144913	0.904089
IKK-16 (IKK Inhibitor VII)	0.095996	0.292917
SC-514	-0.12963	0.196124
IMD 0354	-0.13791	0.331018
BX-795	0.621393	0.198257
Momelotinib (CYT387)	0.708275	1.29996
NVP-BSK805 2HCl	0.245627	0.488407
XL019	0.20123	0.282354
Ruxolitinib (INCB018424)	0.145228	0.932009
Tofacitinib (CP-690550,Tasocitinib)	0.094936	0.263027
S-Ruxolitinib (INCB018424)	0.073788	0.150272
Fedratinib (SAR302503, TG101348)	-0.00786	0.01387
AZ 960	-0.04319	0.099749
WP1066	-0.38113	1.02605
CEP-33779	-0.93024	0.066684
Gandotinib (LY2784544)	-1.14331	0.061814
JNK Inhibitor IX	0.316635	1.27577
SP600125	0.148788	0.665689
JNK-IN-8	-0.21725	0.130164
GNE-0877	0.144889	0.608663
URMC-099	-0.00541	0.016163
GNE-9605	-0.17712	0.642552
PD184352 (CI-1040)	0.452766	0.851966
Refametinib (RDEA119, Bay 86-9766)	0.183411	0.046242
SL-327	0.100036	0.710792
BIX 02189	0.052568	0.498655
PD98059	-0.10282	0.704088
Trametinib (GSK1120212)	-0.3679	0.347606
BIX 02188	-0.40926	1.11126
AZD8330	-0.81844	0.964582
Ridaforolimus (Deforolimus, MK-8669)	0.418728	1.26701
Palomid 529 (P529)	-0.03942	0.210626
INK 128 (MLN0128)	-0.04519	0.22438
WAY-600	-1.08409	0.463988
Everolimus (RAD001)	-1.31864	0.255669
Apitolisib (GDC-0980, RG7422)	0.627736	1.01676
CH5132799	0.206672	0.946171
Omipalisib (GSK2126458, GSK458)	0.179232	0.230065
BGT226 (NVP-BGT226)	0.174447	0.972331
Voxtalisib (SAR245409, XL765) Analogue	0.109622	0.444752
GSK650394	0.072525	0.325831
DDR1-IN-1	-0.07801	0.268175
PFK15	-0.46708	0.348781
Skepinone-L	0.71025	0.158368
Doramapimod (BIRB 796)	0.495509	0.417755
PH-797804	0.454962	1.14122
VX-702	0.256043	0.331168
SB202190 (FHPI)	0.014345	0.00234
SB203580	-0.00802	0.030904
Losmapimod (GW856553X)	-0.01488	0.071668
Asiatic Acid	-0.08465	0.418834
IPA-3	-0.32789	0.135846
FRAX597	-0.94252	0.175122
Crenolanib (CP-868596)	-0.02414	0.083254
CP-673451	-0.26179	0.666459
Sorafenib Tosylate	-0.43997	0.326885
KRN 633	-0.22008	0.452252
AZD2932	-0.12623	1.26515
BX-912	0.798547	0.743848
GSK2334470	0.221049	0.857396
OSU-03012 (AR-12)	0.186363	0.419366
Alpelisib (BYL719)	0.385203	0.59223
YM201636	0.262419	1.01923
PIK-294	0.22258	0.209338
TGX-221	0.22229	0.763115
TG100-115	0.116676	0.602384
A66	0.045347	0.097882
AZD6482	0.036878	0.112081
Idelalisib (CAL-101, GS-1101)	0.006533	0.019957
AS-604850	-0.01975	0.064576
Duvelisib (IPI-145, INK1197)	-0.02262	0.04663
CZC24832	-0.03941	0.098125
PIK-293	-0.05662	0.3531
CAY10505	-0.06574	0.427683
Pictilisib (GDC-0941)	-0.09315	0.137061
AZD1208	0.132401	0.329337
SGI-1776 free base	-0.08126	0.195498
CX-6258 HCl	-0.14813	0.53766
Daphnetin	-0.06198	0.241569
H 89 2HCl	-0.24253	0.016826
Go 6983	0.058097	0.022027
Sotrastaurin	-0.15667	0.327461
Enzastaurin (LY317615)	-0.21355	0.712478
Bisindolylmaleimide I (GF109203X)	-0.24319	0.49885
Rigosertib (ON-01910)	0.20049	0.789722
HMN-214	0.094221	0.446613
BI 2536	0.032298	0.071743
Volasertib (BI 6727)	-0.05573	0.179413
Ro3280	-0.15733	0.086839
GSK461364	-0.19997	0.451824
GW5074	1.34724	1.01295
AZ 628	0.172696	0.51296
Sorafenib	0.04781	0.099304
GDC-0879	0.009934	0.029985
TAK-632	-0.16815	0.523176
MLN2480	-0.19292	0.523569
SB590885	-1.73146	0.421621
RAF265 (CHIR-265)	-0.58849	1.21503
RKI-1447	-0.07994	0.121901
PF-543	0.461421	0.590563
Fingolimod (FTY720) HCl	0.300831	0.854886
SKI II	-0.55988	1.09981
BI-D1870	-0.07398	0.179328
KX2-391	0.213017	0.855797
Bosutinib (SKI-606)	-0.23482	0.52756
PP2	-0.8121	0.386362
PP1	-1.04275	0.88612
Quercetin	-0.07245	0.078697
Piceatannol	-0.23608	0.575694
R406 (free base)	-0.33372	0.867881
Cabozantinib (XL184, BMS-907351)	0.457279	0.461071
BMS-777607	0.114338	0.595091
Cabozantinib malate (XL184)	-0.76973	0.712958
Tie2 kinase inhibitor	0.139668	0.145486
GW441756	0.004771	0.025715
Cediranib (AZD2171)	0.579777	1.03861
ZM 323881 HCl	0.083572	0.137952
SAR131675	0.029177	0.138518
Lenvatinib (E7080)	-0.09017	0.344197
ZM 306416	-0.23315	0.553399
