# Supplementary material for: Oncogenic PKA signaling increases c-MYC protein expression through multiple targetable mechanisms
Source: eLife. 2023 Jan 24;12:e69521. doi: 10.7554/eLife.69521 (PMC9925115; doi:10.7554/eLife.69521)
Supplement: Figure 5—source data 3. [file elife-69521-fig5-data3.xlsx]

## Sheet: 5C
	Average AUC Z-score	Average AUC Z-score
PRKCZ	-2.01381
ADCK4	-1.83435
PRKAR1A	-1.83226
PIM2		-1.82596
MARK4	-1.60764
PRKG1	-1.6008
KIAA1804	-1.58138
PRKCN	-1.55965
ROR1	-1.50564
MAPKAPK2	-1.50285
EGFR		-1.47614
ACVR2B	-1.45832
CDKN1B	-1.43946
ABL2	-1.42662
EPHA6	-1.41839
ANKK1	-1.4134
PRKAR2B	-1.40276
PACSIN1	-1.39674
TTK	-1.39289
KIT	-1.38706
HUNK	-1.38375
MYO3B	-1.35078
NME3	-1.34105
RPS6KB1		-1.31119
MULK	-1.2995
LRRK2	-1.2942
PSKH2	-1.29048
THNSL1	-1.27752
GSG2	-1.27417
KSR	-1.27371
MAP3K7	-1.2652
SYK	-1.24371
EPHA5	-1.24336
CSNK1G2	-1.20776
PTK2	-1.20648
INSRR	-1.19372
MAPKAPK3	-1.19153
PRKAG3	-1.1865
DKFZP761P0423	-1.18285
HRI	-1.17931
NEK4	-1.17472
MAST4	-1.1732
PANK1	-1.17024
MAP3K14	-1.16606
YES1	-1.1491
CDC2	-1.14835
HIPK2	-1.14417
ACVR2	-1.14042
FLJ32685	-1.14008
IHPK2	-1.12253
HK3	-1.10481
FLJ34389	-1.10348
GNE	-1.08972
WEE1	-1.07849
LIMK2	-1.07236
CDKL5	-1.0709
STK39	-1.06911
PRPS1	-1.06473
SSTK	-1.04235
PLK1	-1.03101
AK3	-1.02221
PI4K2B	-1.02126
CDK5	-1.01392
COASY	-1.01135
JAK1	-1.00686
FGR	-0.998365
MAP3K3	-0.990019
STK16	-0.976099
MAPK8	-0.967567
TYK2	-0.965682
DKFZP434C131	-0.964453
DAPK3	-0.961899
ATM	-0.95324
LYN	-0.952747
PLK3	-0.938908
RFK	-0.933155
FER	-0.93285
GTF2H1	-0.929286
HK2	-0.928845
URKL1	-0.927828
LIMK1	-0.927809
NEK5	-0.925777
KIAA1811	-0.925099
ACVR1	-0.923456
STK25	-0.92324
DGUOK	-0.917422
KCNH8	-0.897465
CDKN1A	-0.890053
EPHA8	-0.889768
PKM2	-0.885776
STK32A	-0.881247
CKB	-0.877791
PRKCE	-0.872572
PKLR	-0.869383
EPHB1	-0.868842
ROR2	-0.867476
UMPK	-0.867415
DGKB	-0.858904
VRK2	-0.854092
STK36	-0.853196
CSK	-0.847535
SGK	-0.847269
IGF1R	-0.842621
CALM1	-0.832264
IHPK3	-0.826605
JIK	-0.826186
CARKL	-0.823983
CRK7	-0.8208
PIK3C2A	-0.817863
PRKACB	-0.812288
KALRN	-0.803428
PAK1	-0.8021
NRBP	-0.793531
NME4	-0.792595
CERK	-0.7918
PRKACA		-0.77534
IRAK1	-0.765081
SAST	-0.763432
KSR2	-0.761731
PIK3CB	-0.760791
PRKAB1	-0.760313
CALM3	-0.760118
GSK3A	-0.739601
AK7	-0.738282
DLG3	-0.737511
NEK1	-0.73489
CDC42BPA	-0.731081
AURKB	-0.729976
PKIA	-0.725261
TTBK1	-0.723704
PIP5KL1	-0.721788
BUB1B	-0.714903
CASK	-0.713988
LMTK3	-0.712977
CSNK1G3	-0.703209
DYRK1A	-0.698903
PRKAR1B	-0.698735
MATK	-0.692664
LRRK1	-0.680354
PAK7	-0.672808
CHEK2	-0.669739
MAP4K3	-0.665509
ROS1	-0.664866
ARAF1	-0.659111
PRKWNK2	-0.657026
CDK6	-0.654401
STK17B	-0.651153
STK17A	-0.647283
BMPR2	-0.643734
HK1	-0.633427
BRDT	-0.626968
BRD3	-0.626754
GRK4	-0.623181
MET	-0.62093
LOC91461	-0.614378
PIK3C3	-0.613156
GRK1	-0.612546
TRIB3	-0.606912
MINK	-0.59952
PRKCB1	-0.598117
CKMT2	-0.595431
PAPSS1	-0.581927
GRK6	-0.579787
BMPR1A	-0.576792
TLK2	-0.576417
RYK	-0.569743
CHUK	-0.568507
FRDA	-0.566957
MERTK	-0.565852
GUCY2D	-0.556815
RPS6KA4	-0.555913
TTBK2	-0.553509
PLK2	-0.551075
PIP5K3	-0.537015
MAST2	-0.536967
PDGFRB	-0.534003
PHKA2	-0.526235
TEK	-0.525981
C7ORF2	-0.521464
PDXK	-0.518312
DGKI	-0.514664
FLJ23074	-0.50909
MGC4796	-0.508906
PRKWNK3	-0.508483
DLG2	-0.507612
IKBKAP	-0.506809
GCK	-0.50539
CPNE3	-0.502317
ICK	-0.495233
PIK3C2G	-0.4907
NME6	-0.483686
MAP3K11	-0.476565
TRPM7	-0.474797
ALS2CR2	-0.474419
ZAK	-0.47247
DYRK3	-0.470115
AURKC	-0.463676
NRK	-0.460514
FES	-0.451505
EEF2K	-0.448394
RPS6KB2	-0.444963
VRK3	-0.442464
STK33	-0.441951
RPS6KC1	-0.437325
LAK	-0.435236
EIF2AK4	-0.434708
CDK4	-0.433779
PTK9L	-0.433294
DUSTYPK	-0.433264
KIAA1361	-0.432132
PRPS1L1	-0.429619
UMP-CMPK	-0.428842
EPHA4	-0.425859
GUCY2F	-0.423783
ARK5	-0.423405
PFKM	-0.41942
KIAA2002	-0.417205
ADCK2	-0.415265
C9ORF12	-0.413347
SNF1LK	-0.411263
NME5	-0.411017
PKN3	-0.407077
PDK3	-0.404901
WNK4	-0.403814
ADRBK2	-0.401601
CHKA	-0.398835
CDK5R2	-0.398394
GK	-0.396643
BMP2K	-0.395085
CAMKK2	-0.393425
EPHA2	-0.391217
VRK1	-0.386924
DCAMKL1	-0.386727
ILK-2	-0.38449
PIK3CD	-0.379011
DCK	-0.378317
N4BP2	-0.377592
TEC	-0.373864
PDK2	-0.373661
MAK	-0.372304
TGFBR1	-0.369401
NME2	-0.365251
PFTK1	-0.365172
HAK	-0.362272
MAPK1	-0.360695
FN3KRP	-0.359584
CLK2	-0.356553
RELA	-0.35257
MAP4K1	-0.34922
NEK11	-0.348799
PAK3	-0.346695
CIT	-0.34593
ROCK1	-0.339152
PHKB	-0.337157
TEX14	-0.333593
MAP4K2	-0.330122
PCTK3	-0.327957
FN3K	-0.325744
PIK3C2B	-0.324083
MAPK4	-0.322655
ZAP70	-0.319797
MAP3K9	-0.319699
CALM2	-0.317237
SSTK	-0.313994
KIAA1639	-0.311244
GRK5	-0.30027
LOC340156	-0.299395
MYLK2	-0.295584
PIK4CB	-0.293556
XYLB	-0.293104
CRIM1	-0.292446
SRC	-0.286384
NAGK	-0.285869
SPHK1	-0.285401
RAGE	-0.284437
CDK10	-0.283159
EIF2AK3	-0.279833
SRPK2	-0.279248
MAP3K5	-0.278692
BTK	-0.275298
LTK	-0.27477
STK22D	-0.273038
CAMKK1	-0.271962
PDPK1	-0.26617
C9ORF96	-0.265781
SCYL1	-0.261408
PRKAB2	-0.259561
TOPK	-0.25881
PANK2	-0.258016
NEK8	-0.254376
MAP2K2	-0.250078
RFP	-0.250028
PANK3	-0.241376
MASTL	-0.238828
TAO1	-0.232037
CLK1	-0.23196
PKIB	-0.231349
PHKG2	-0.230192
MAP3K6	-0.229624
STK38L	-0.227312
DMPK	-0.223785
C14ORF20	-0.218965
STK22B	-0.216988
NEK2	-0.214989
GUCY2C	-0.212423
IPMK	-0.21201
MAPK10	-0.21118
MELK	-0.206562
NRBP2	-0.206003
DLG1	-0.203959
PXK	-0.202237
RPS6KA1	-0.2015
DGKQ	-0.201431
ULK2	-0.200141
RNASEL	-0.199395
MLCK	-0.194523
EPHA10	-0.194466
CHKB	-0.188228
MIDORI	-0.186488
PGK1	-0.185311
CAMK4	-0.184069
ETNK1	-0.183821
PHKA1	-0.179245
TNIK	-0.177515
PFKFB3	-0.175677
CDADC1	-0.174654
PFKFB1	-0.174232
CSF1R	-0.17137
PIK4CA	-0.169071
PDIK1L	-0.164453
PIM3	-0.162078
LMTK2	-0.161638
UHMK1	-0.160738
MAPK6	-0.154628
CDKL2	-0.152193
BMX	-0.149824
PCTK2	-0.145874
TGFBR3	-0.144953
PRKAG2	-0.143156
BLK	-0.140902
CSNK2A2	-0.138707
MAPK7	-0.136012
CKS2	-0.135939
PHKG1	-0.134691
PIP5K2C	-0.130883
PCTK1	-0.122076
PIP5K1A	-0.121573
TRIO	-0.115521
PRKCA	-0.110384
CLK4	-0.109881
PDK4	-0.109569
ADK	-0.108506
MAPK3	-0.105804
HIPK4	-0.105473
CSNK1D	-0.105451
ADCK5	-0.0978614
NPR2	-0.0966232
NTRK2	-0.0965697
MST1R	-0.0953757
LATS1	-0.0878935
TNK1	-0.0821333
PFKL	-0.0704746
PAK4	-0.0638883
IKBKB	-0.0634347
MAGI-3	-0.0615988
CAMK2G	-0.0601838
PRKDC	-0.0598556
CDKL1	-0.0589974
SMG1	-0.056376
EFNB3	-0.05553
ADP-GK	-0.0548906
FYN	-0.0517854
PIK3CA	-0.0489489
PRKACG	-0.0487905
CAMK2B	-0.0447114
DDR2	-0.0444576
DYRK4	-0.0431655
SIK2	-0.0382331
ITPKA	-0.0379093
ULK4	-0.0315304
PRKCH	-0.0286976
TESK2	-0.0272118
IRAK3	-0.0253182
PDGFRA	-0.0252038
CSNK1G1	-0.0251213
MAP3K10	-0.0233218
MVK	-0.0219643
SRMS	-0.0197531
NEK7	-0.019114
TPK1	-0.0168299
PIK3R1	-0.0161811
PFKFB2	-0.0153471
STK23	-0.0137258
MAP2K5	-0.0132629
STK35	-0.0105723
FGFRL1	-0.0055792
CRKL	-0.0010499
EPHB3	-0.0004747
PRKR	0.00682025
HCK	0.00746525
PNKP	0.00939387
NYD-SP25	0.0105356
MAP2K4	0.0130783
CSNK1A1	0.017679
DLG4	0.0205063
FLJ23356	0.0345422
PRKAA1	0.0346832
COMMD3	0.037437
PNCK	0.0418538
DAPK1	0.04773
DAPK2	0.0603327
CDC2L2	0.0616442
MYO3A	0.0638428
CLK3	0.0682942
TK2	0.0768877
PRKWNK1	0.0797623
CAMK2D	0.0813455
PIP5K2B	0.0819303
PRPS2	0.0823578
STK19	0.0875268
FLJ23356	0.0904905
FLJ25006	0.0910267
EPHA3	0.0924193
STK29	0.0943152
AKT2	0.0951787
ADCK1	0.100844
AMHR2	0.103043
ACVR1C	0.104057
MAP3K4	0.109109
PAK2	0.115139
AKT1	0.116497
EPHB4	0.121086
GOLGA5	0.121795
FRAP1	0.122056
MAPKAPK5	0.122192
LYK5	0.123187
MUSK	0.128774
CDKN2C	0.13391
NTRK1	0.137335
PIP5K1B	0.137378
NEK6	0.14461
SGK2	0.151193
TRIB1	0.151767
ROCK2	0.154642
MGC16169	0.158182
PFKP	0.161374
NME1	0.164056
RP6-213H19.1	0.165662
FGFR2	0.17285
TSKS	0.178077
NTRK3	0.17863
PTK7	0.181565
MAP3K2	0.182496
BMPR1B	0.183107
RBKS	0.183556
ERN1	0.184829
PRKCI	0.184834
HIPK1	0.185152
MAPK14	0.189249
TGFBR2	0.193245
KUB3	0.193889
GRK7	0.197284
STK11	0.199155
DYRK2	0.199397
FASTK	0.205481
GSK3B	0.207437
MAP4K4	0.208625
DGKA	0.212302
GUK1	0.213162
CDC42BPB	0.213178
FLJ10761	0.21766
CDC7	0.221133
MAP4K5	0.222843
BAIAP1	0.224613
BCKDK	0.235756
STK38	0.23642
DGKG	0.236458
IRAK2	0.237133
BRD2	0.237829
PRPF4B	0.238652
CDK2	0.240847
CAMK1	0.243415
STK3	0.247526
TLK1	0.254545
RPS6KA5	0.257181
STK31	0.257707
ITPKC	0.2603
TJP2	0.261261
FLT3	0.261657
MAST3	0.264709
PACE-1	0.265103
PYCS	0.26798
MKNK2	0.269313
BCR	0.269833
MAP2K7	0.270199
TAF1L	0.277091
MOS	0.280995
IRAK4	0.286893
FLJ13052	0.292201
COL4A3BP	0.30623
NUP62	0.306656
SGKL	0.3105
TYRO3	0.311401
EFNA4	0.311534
GAK	0.312814
CKS1B	0.316957
DGKH	0.319373
PFKFB4	0.323129
MAPK13	0.328874
RPS6KA3	0.329684
PSKH1	0.329968
RIPK3	0.338384
STK24	0.342157
RIPK1	0.347041
PTK2B	0.347282
PIK3R2	0.35922
ERBB4	0.359793
PRKY	0.364939
FGFR3	0.366039
PAPSS2	0.373506
MAP3K8	0.387512
CSNK1A1L	0.388924
ANKRD3	0.391096
NTC	0.391973
MGC4796	0.396068
PRKX	0.400647
ABL1	0.406313
PRKCL2	0.407674
DUSP21	0.417576
NEK3	0.418047
MAP3K1	0.423601
JAK2	0.427111
ACVRL1	0.428733
MAP2K6	0.43193
RAF1	0.434696
AURKA	0.434723
AATK	0.439921
CIB2	0.442909
ACVR1B	0.449908
EPHB2	0.45511
SPHK2	0.460204
NEK9	0.464324
PIK3R3	0.464803
LOC390226	0.46525
SPEG	0.465774
RET	0.471311
BUB1	0.474399
PTK6	0.4744
NTC	0.474449
TRIB2	0.48368
PIK3CG	0.486093
CDK3	0.486739
SNARK	0.487572
TRPM6	0.503905
PIP5K1C	0.520914
TAF1	0.521968
AK5	0.522472
FRK	0.524283
CDKN2B	0.525484
CDKN2D	0.531581
CSNK2B	0.543746
NTC	0.546103
KIAA0999	0.548938
JAK3	0.550941
IGF2R	0.555757
EPHA7	0.557425
AIP1	0.557621
PRKCSH	0.557949
KIAA1811	0.571126
MPP3	0.571393
ITK	0.572528
CDKL3	0.585534
AKT3	0.588871
KCNH2	0.590143
IHPK1	0.591196
ASK	0.59975
GK2	0.60177
PRKCQ	0.602879
ERBB3	0.609917
MAP3K13	0.617443
RPS6KA2	0.617884
OSR1	0.619984
PDGFRL	0.631336
UCK1	0.631467
CAMK1D	0.641482
CKMT1B	0.646573
HUS1	0.64897
RIOK1	0.654081
AK3L1	0.664412
STK22D	0.664917
ERK8	0.667957
PI4KII	0.66885
FGFR4	0.671069
EPHA1	0.67244
CDC2L1	0.675866
PMVK	0.677011
MAPK12	0.678268
STK4	0.683833
MGC45428	0.693528
RIOK2	0.694929
PRKAA2	0.70217
CDK11	0.710685
PIM1	0.713248
SBK1	0.713377
ATR	0.715189
ALS2CR7	0.718542
STK22C	0.721609
CDK7	0.727713
TNNI3K	0.730939
MARK1	0.740993
CDC2L5	0.745907
MARK3	0.750965
PRKD2	0.753505
ADRBK1	0.76982
PDK1	0.770194
NUCKS	0.773419
MAP3K7IP1	0.773696
PANK4	0.775758
C10ORF89	0.775995
GALK2	0.777219
STK10	0.779216
CDKN1C	0.779218
ITPK1	0.785541
MAP3K15	0.790311
ILK	0.790505
CDK5R1	0.812729
MGC8407	0.832904
DTYMK	0.838917
EFNA5	0.839023
IKBKE	0.844351
PRKAR2A	0.844968
PASK	0.850904
MAP2K3	0.853627
STK32C	0.861988
TESK1	0.867045
PCK2	0.86758
PCK1	0.876423
CSNK1E	0.899769
KIAA1765	0.90204
RIPK2	0.905141
AK1	0.90842
PRKCD	0.912745
MAPK9	0.918899
PLK4	0.919753
MPP2	0.925379
EFNA3	0.936981
AAK1	0.950327
PIK3R4	0.952813
MARK2	0.960676
PKMYT1	0.967054
CAMKK1	0.971447
PGK2	0.976703
FUK	0.98001
MGC42105	0.985425
PRKAG1	0.987189
PRKCL1	0.987781
CCRK	0.99822
FLT1	0.999271
MKNK1	1.01985
STK32B	1.03249
CDKL4	1.03461
MAP3K12	1.0357
CKM	1.044
IKBKG	1.04909
SRPK1	1.04933
DGKK	1.05241
TBK1	1.06932
PINK1	1.07164
HSMDPKIN	1.08294
SNRK	1.08323
FGFR1	1.10517
PRKG2	1.12656
LATS2	1.16741
CHEK1	1.16755
NME7	1.17489
RPS6KA6	1.17806
BRAF	1.1977
AK2	1.20408
EPHB6	1.21145
TP53RK	1.22516
PRKCM	1.2287
KDR	1.2313
PIP5K2A	1.23223
SRP72	1.23701
CDK9	1.26055
BRD4	1.26337
ERBB2	1.30627
PRKCG	1.30638
DDR1	1.31741
CSNK2A1	1.35533
SCAP1	1.36895
TNK2	1.40539
CAMK2A	1.4234
HIPK3	1.43186
INSR	1.46357
NLK	1.47635
P101-PI3K	1.49171
PTK9	1.49773
PAK6	1.52943
LCK	1.60716
KHK	1.61914
HSPB8	1.65995
SLK	1.72848
ALK	1.75013
DGKD	1.90805
ULK1	2.01542
RIOK3	2.03398
MPP1	2.04
FLT4	2.07134
CAMKIINALPHA	2.12135
EXOSC10	2.14532
CDK8	2.15826
RPS6KL1	2.30302
GALK1	2.44369
DYRK1B	2.52742
AXL	2.64775
CAMK1G	2.66487
MAPK11	2.85224
MYLK	3.37299
MAP2K1	3.54967
STYK1	3.79018
ITPKB	3.92935
ERN2	4.82145
