# Supplementary material for: Oncogenic PKA signaling increases c-MYC protein expression through multiple targetable mechanisms
Source: eLife. 2023 Jan 24;12:e69521. doi: 10.7554/eLife.69521 (PMC9925115; doi:10.7554/eLife.69521)
Supplement: Figure 5—source data 4. [file elife-69521-fig5-data4.xlsx]

## Sheet: Figure 5D
FLX1 AURKA Inhibitors Sensitivity
Drug Conc [nM, power of 10]	Aurora A Inhibitor I (Type II)									AZD1152 (Type II)									CD532 (CD disruptor)									Hesperadin (Type I)									MLN-8237 (Partial CD disruptor)												SNS-314 (Type II)
Replicate	#1	#1	#1	#2	#2	#2	#3	#3	#3	#1	#1	#1	#2	#2	#2	#3	#3	#3	#1	#1	#1	#2	#2	#2	#3	#3	#3	#1	#1	#1	#2	#2	#2	#3	#3	#3	#1	#1	#1	#2	#2	#2	#3	#3	#3	#4	#4	#4	#1
4	0.916803	0.947532	0.911655	0.867298	0.834298	0.846606	0.805461	0.837073	0.806524	0.968013	0.986599	0.949866	0.854042	0.901688	0.936481	0.831732	0.895308	0.782064	0.000506855	0.000595221	0.00746111	0.000714418	0.000786554	0.00702766	0.000422853	0.000676565	0.00339173	0.929289	1.00864	1.05432	0.941567	0.821282	0.927652	1.0395	0.907164	0.878499	0.981161	0.982278	0.865759	0.747274	0.845541	0.883054	0.80987	0.829348	0.850007	0.879602	0.917439	0.910231	0.78103
3.52288	0.983144	0.996583	0.965507	0.913104	0.939504	0.952955	0.881402	0.892771	0.867296	1.03854	1.01059	1.06717	0.960672	0.95671	0.954572	0.855689	0.913121	0.903456	0.00283772	0.0034046	0.0122112	0.0168478	0.011661	0.0220415	0.00788955	0.00668553	0.0112813	0.929224	1.00721	1.08913	0.892468	0.853928	0.946715	0.987869	0.909197	0.935979	0.947772	1.01756	0.958701	0.883173	0.933673	1.07635	0.894384	0.942928	0.929268	0.917559	0.962029	0.987575	0.907073
3.04576	1.06073	1.08344	1.03343	0.900367	1.03783	0.940747	0.916409	0.872502	0.862262	1.06012	1.03367	1.00203	1.00748	0.957336	1.0599	0.837365	0.975169	0.980292	0.232496	0.221856	0.327692	0.279643	0.272965	0.277014	0.320682	0.37606	0.386983	0.948394	1.14301	1.04978	0.896383	0.877102	0.978867	0.945937	0.954605	0.933189	1.04916	1.08594	1.01292	1.0092	1.04659	1.15866	0.914466	1.0149	0.978048	0.909627	0.980059	1.00397	0.961724
2.56864	1.07279	1.08463	1.05099	0.944729	1.02682	1.0357	0.960364	0.937059	0.928208	1.06022	1.09146	1.0571	1.06928	1.05157	1.09047	0.905224	0.979705	1.01334	0.333057	0.379221	0.617531	0.994636	0.99191	1.00256	0.983572	1.04601	1.00412	1.03709	1.13222	1.16127	0.925498	0.902329	1.00389	0.997463	1.00937	1.00633	1.03541	1.14156	0.98453	0.977532	1.05375	1.15999	0.928767	1.00212	0.968035	0.976406	1.04038	1.03725	1.05457
2.09151	1.03816	1.04075	1.08765	0.945144	1.00834	0.999312	0.912218	0.904861	0.88607	1.05662	1.08376	1.05705	1.05986	1.00128	1.08894	0.932728	1.04772	0.996429	0.750297	0.769698	1.03204	1.01393	1.05863	1.0529	1.10271	1.12548	1.15629	1.06089	1.16247	1.11918	0.847648	0.895948	1.01971	0.970973	0.966596	0.992478	1.04718	1.00093	0.918009	1.0009	1.16633	1.15989	1.0142	1.05255	1.04186	1.0431	1.10224	1.13912	1.01853
1.61439	1.0693	1.10707	1.00496	0.949249	1.0408	1.03191	0.928874	1.00231	0.986284	1.0585	1.03126	1.04768	1.06176	0.978277	1.05381	0.979236	1.07888	0.943072	1.05008	1.03115	1.13839	1.00183	1.00396	1.06403	1.06786	1.12015	1.1737	1.09971	1.11549	1.10286	0.959492	0.964532	0.955352	1.06627	1.01775	1.02485	1.05016	1.13842	0.948132	1.03231	1.14127	1.1347	1.03789	1.08717	1.09552	1.09764	1.14015	1.15401	1.02693
1.13727	1.04532	1.06214	1.03609	1.02125	0.944761	0.991555	0.955355	0.9247	0.946861	1.02304	1.06114	0.999679	1.05665	1.07162	0.98455	0.965345	1.00953	1.00395	1.03637	1.14883	1.13781	1.03305	1.02723	1.07195	1.09816	1.14605	1.11777	0.99909	1.19265	1.10992	0.908733	1.03462	1.02866	1.00234	1.00027	0.952982	1.11312	1.17269	1.04491	1.01756	1.11801	1.21426	1.04461	1.09181	1.05373	1.06229	1.11702	1.14659	1.072
0.660151	1.06951	1.04369	1.01153	0.955333	0.931134	1.08996	0.973154	0.980893	0.987056	1.03728	1.03624	1.01482	1.02432	1.0059	1.07014	0.88622	1.10778	1.03392	1.10722	1.09636	1.2096	0.963612	1.05469	1.05645	1.05378	1.10469	1.13316	0.9866	1.06398	1.09673	0.963436	0.943822	1.03061	1.0163	0.997882	1.03528	1.17755	1.23963	0.908528	1.00794	1.10116	1.08405	1.05389	1.0489	1.03615	1.05673	1.11859	1.14583	0.968394
0.18303	1.05231	1.09432	1.10622	0.94908	1.02175	0.986844	1.00113	1.01389	1.00267	1.11785	1.07158	0.991491	1.06627	1.00688	1.04013	0.935763	1.06058	0.973166	1.03888	1.09405	1.12815	0.984566	1.03528	1.01904	0.94907	1.01406	1.05343	0.949798	1.12095	1.08339	0.93665	0.976134	1.027	1.0644	0.997248	1.03043	1.10626	1.19269	0.968515	1.00775	1.15902	1.15307	1.03675	1.01023	1.02635	1.02607	1.09578	1.14903	1.0578
[truncated: 20 more columns]
