# Supplementary material for: Oncogenic PKA signaling increases c-MYC protein expression through multiple targetable mechanisms
Source: eLife. 2023 Jan 24;12:e69521. doi: 10.7554/eLife.69521 (PMC9925115; doi:10.7554/eLife.69521)
Supplement: Figure 5—source data 5. [file elife-69521-fig5-data5.xlsx]

## Sheet: Figure 5D
FLX1 PIMS Inhibitors Sensitivity
Drug Conc [nM, power of 10]	AZD1208									CX-6258									SGI-1776									SMI-4a
Replicate	#1	#1	#1	#2	#2	#2	#3	#3	#3	#1	#1	#1	#2	#2	#2	#3	#3	#3	#1	#1	#1	#2	#2	#2	#3	#3	#3	#1	#1	#1	#2	#2	#2	#3	#3	#3
4	0.829	0.934594	0.909245	0.984753	0.980019	0.958906	0.890265	0.916217	0.926243	0.0181024	0.0113091	0.301468	0.0187122	0.00905336	0.00820902	0.0114223	0.00102929	0.00091408	0.91324	0.817922	0.892269	0.620116	0.559132	0.588672	0.57108	0.697192	0.701291	1.00679	0.929971	0.834006	0.801416	0.857609	1.02891	0.896732	0.91641	0.893224
3.52288	0.964947	1.03887	1.00821	1.08537	1.07312	1.0085	1.06061	1.15888	1.08559	0.791502	0.82824	0.87065	0.738913	0.682497	0.697429	0.028094	0.0128578	0.014686	1.02535	1.00833	1.03695	0.963998	0.930906	0.941702	0.887829	0.959323	0.9	1.12215	1.07573	0.968777	0.829136	0.892245	1.04518	1.02641	0.956785	0.984521
3.04576	1.05154	1.0563	1.08517	1.09723	1.09273	1.1332	1.03908	1.05532	1.22289	0.932669	1.004	0.999834	0.898081	0.881047	0.839669	0.849898	0.803519	0.863865	1.03973	1.07806	1.108	0.946595	0.97623	0.994795	0.991818	1.03003	1.00042	1.17249	1.10537	1.01818	0.908435	1.04968	1.06779	1.11902	1.02701	0.996961
2.56864	1.05719	1.11825	1.02802	1.06801	1.08089	1.04479	1.08937	1.14795	1.07435	1.11782	1.052	1.09429	0.974431	1.02142	0.970448	1.02307	1.03349	1.04041	1.0132	1.09333	1.18714	1.05091	1.07297	1.03	1.02695	1.11774	1.12269	1.20763	1.11263	1.07467	0.871162	1.02427	1.14082	1.08151	1.06353	1.02542
2.09151	1.06808	1.03497	1.09643	1.02819	1.06318	1.05068	1.11746	1.14071	1.16946	1.11289	1.16798	1.13099	1.08999	1.04934	1.02535	1.00855	1.08369	1.07465	1.06077	1.18578	1.16048	1.06035	1.06974	1.06465	1.0026	1.1332	1.03055	1.21965	1.11058	1.12493	0.897391	1.0634	1.10009	1.09827	0.953451	1.01424
1.61439	1.07019	1.1637	1.15279	1.10297	1.11567	1.0845	1.11885	1.14308	1.06913	1.07522	1.19129	1.11385	1.02265	1.03684	0.995488	1.12537	1.04013	1.01709	1.10431	1.19704	1.13383	1.03828	1.11089	1.09855	1.13404	1.16274	1.03584	1.15641	1.11016	1.10214	0.877609	1.05755	1.05797	1.08399	0.97629	1.04007
1.13727	1.08497	1.08442	1.11933	1.07241	1.11557	1.05217	1.1429	1.13228	1.16652	1.08124	1.11655	1.09436	1.09106	1.03263	0.946718	1.19163	1.15192	1.17245	1.01276	1.19981	1.25831	1.04477	1.13436	1.1866	1.12583	1.07937	1.15096	1.17112	1.16508	1.08689	0.870437	0.958214	1.03378	1.12067	1.03493	0.989559
0.660151	1.06721	1.14328	1.10562	1.05251	1.17321	1.04251	1.05594	1.19557	1.16507	1.17404	1.06059	1.08962	1.08237	1.0638	0.984985	1.06868	1.08423	1.11679	1.03255	1.17092	1.17288	1.03665	1.12509	1.16297	1.06654	1.1009	1.08981	1.21533	1.1061	1.05483	0.884774	1.00664	1.08097	1.08344	1.04514	1.01345
0.18303	1.07364	1.12581	1.1753	1.09492	1.14435	1.02138	1.0112	1.02578	1.01696	1.09546	1.13765	1.06693	1.12204	1.0588	0.95687	1.12386	1.08569	1.02188	0.975908	1.13451	1.11539	1.01537	1.05942	1.0991	1.08561	1.05233	1.03266	1.19737	1.01577	1.00437	0.833611	1.01501	1.13665	1.00673	0.967059	0.983264
