# Supplementary material for: Oncogenic PKA signaling increases c-MYC protein expression through multiple targetable mechanisms
Source: eLife. 2023 Jan 24;12:e69521. doi: 10.7554/eLife.69521 (PMC9925115; doi:10.7554/eLife.69521)
Supplement: Figure 6—source data 1. [file elife-69521-fig6-data1.xlsx]

## Sheet: Sheet1
Cell line	Adjusted p
ML1	0.635079
COLO741	2.72252
639V	1.34215
NCI-H526	2.56553
NCI-H69	1.60501
