# Supplementary material for: Oncogenic PKA signaling increases c-MYC protein expression through multiple targetable mechanisms
Source: eLife. 2023 Jan 24;12:e69521. doi: 10.7554/eLife.69521 (PMC9925115; doi:10.7554/eLife.69521)
Supplement: Figure 7—figure supplement 1—source data 3. [file elife-69521-fig7-figsupp1-data3.xlsx]

## Sheet: Sheet1
Gene	AUC Log2FC vs NTC
siNTC	0.0783781	-0.082882
siPRKACA	0.334314	0.441806	0.385163
siMYC	0.209371	0.292886	0.237317
