# Supplementary material for: Oncogenic PKA signaling increases c-MYC protein expression through multiple targetable mechanisms
Source: eLife. 2023 Jan 24;12:e69521. doi: 10.7554/eLife.69521 (PMC9925115; doi:10.7554/eLife.69521)
Supplement: Figure 7—source data 4. [file elife-69521-fig7-data4.xlsx]

## Sheet: 7D
FLX1 Parental with Zotatifin
	Dox-			Dox+
Drug Conc [nM]	20220208	20220208	20220208	20220208	20220208	20220208
3	0.393689	0.388628	0.403293	0.746346	0.671706	0.638576
2.52288	0.403486	0.398063	0.402111	0.801202	0.75299	0.728276
2.04576	0.381056	0.389484	0.37684	0.774864	0.759361	0.731695
1.56864	0.398832	0.395681	0.375721	0.874365	0.874025	0.817136
1.09152	0.508083	0.52693	0.517413	1.20271	1.19909	1.12745
0.614394	0.876996	0.857718	0.935797	1.27917	1.36419	1.28026
0.137272	1.04485	1.04701	1.0216	1.28173	1.189	1.18299
-0.33985	1.01518	1.08065	1.08632	1.15541	1.12419	1.10647
-0.81697	1.01811	1.04657	1.05529	1.15144	1.11608	1.01137
