# Supplementary material for: Oncogenic PKA signaling increases c-MYC protein expression through multiple targetable mechanisms
Source: eLife. 2023 Jan 24;12:e69521. doi: 10.7554/eLife.69521 (PMC9925115; doi:10.7554/eLife.69521)
Supplement: Figure 7—source data 5. [file elife-69521-fig7-data5.xlsx]

## Sheet: 7E
Drug Conc [nM]	Zotatifin
	#1	#1	#1	#1	#1	#1	#2	#2	#2	#2	#2	#2	#3	#3	#3	#3	#3	#3
3	0.228208	0.222469	0.221864	0.217599	0.209555	0.214995	0.315718	0.320949	0.278828	0.307196	0.284094	0.306488	0.18707	0.202052	0.21124	0.23172	0.213435	0.210216
2.52288	0.227586	0.234718	0.228949	0.22528	0.210477	0.232967	0.321347	0.304915	0.315594	0.296908	0.321446	0.320796	0.205121	0.206552	0.224016	0.255213	0.242912	0.224309
2.04576	0.250244	0.246583	0.252619	0.245986	0.248858	0.250629	0.357641	0.351503	0.347736	0.345377	0.315163	0.337202	0.230356	0.284082	0.244536	0.261826	0.240224	0.266648
1.56864	0.288812	0.287378	0.286958	0.296441	0.272643	0.285336	0.379471	0.396414	0.352884	0.369237	0.337355	0.348174	0.248712	0.276297	0.261806	0.296823	0.277104	0.284499
1.09152	0.475674	0.481971	0.465533	0.468858	0.466516	0.471694	0.524306	0.52487	0.516248	0.508928	0.520896	0.56697	0.491692	0.425459	0.438333	0.467661	0.435648	0.433241
0.614394	0.803605	0.777524	0.760884	0.839309	0.763617	0.848137	0.803233	0.812235	0.774723	0.851925	0.796351	0.812919	0.820575	0.84852	0.879797	0.906711	0.855989	0.925671
0.137272	1.00317	1.00967	0.851461	0.973148	0.924168	1.03786	0.867298	0.923785	0.956444	0.964759	0.933159	0.943999	0.916114	1.09803	1.06794	1.11033	1.12346	1.11968
-0.33985	1.09718	1.02964	0.95181	1.00502	0.957287	0.990966	0.896014	1.0048	0.938897	0.89236	0.958531	0.981484	0.994743	1.12953	1.07	1.22803	1.17041	1.22838
-0.81697	1.05198	0.940733	0.966548	0.981156	0.970271	0.982084	0.976468	0.974624	1.00304	0.998101	0.883872	0.918786	0.89928	1.10681	1.15301	1.18209	1.11432	1.11548
