# Supplementary material for: Oncogenic PKA signaling increases c-MYC protein expression through multiple targetable mechanisms
Source: eLife. 2023 Jan 24;12:e69521. doi: 10.7554/eLife.69521 (PMC9925115; doi:10.7554/eLife.69521)
Supplement: Figure 7—source data 6. [file elife-69521-fig7-data6.xlsx]

## Sheet: 7F
Zotatifin	NTC			siPRKACA			siMYC
3	0.529663	0.485785		0.639015	0.732666	0.643261	0.740765	0.738555	0.704077
2	0.661742	0.518609		0.676867	0.834747	0.811488	0.786671	0.837375	0.685276
1	0.64784	0.566892		1.27215	1.00254	0.876706	0.70612	0.76	0.763728
0	0.968118	0.827033		1.18343	1.11349	1.16604	0.880496	0.933806	1.00708
-1	0.890779	1.03377		1.07421	1.05441	1.04079	1.05651	1.13388	1.05631
