# Supplementary material for: Oncogenic PKA signaling increases c-MYC protein expression through multiple targetable mechanisms
Source: eLife. 2023 Jan 24;12:e69521. doi: 10.7554/eLife.69521 (PMC9925115; doi:10.7554/eLife.69521)
Supplement: Figure 7—source data 7. [file elife-69521-fig7-data7.xlsx]

## Sheet: 7G
Gene	DMSO			Zotatifin
CCND1	0.0107474	0.0034991	-0.0142465	-0.94304	-0.873769	-0.83067
ODC	0.053327	0.00662037	-0.0599474	-1.15149	-0.915743	-0.778576
eIF4A2	0.058692	0.0144092	-0.0731012	0.443234	0.42503	0.385252
