# Supplementary material for: Oncogenic PKA signaling increases c-MYC protein expression through multiple targetable mechanisms
Source: eLife. 2023 Jan 24;12:e69521. doi: 10.7554/eLife.69521 (PMC9925115; doi:10.7554/eLife.69521)
Supplement: Supplementary file 2. [file elife-69521-supp2.xlsx]

## Sheet: 639VPRKACA-phospho
Protein	mod_sites	DOX.DMSO_log2FC	DOX.DMSO_pvalue	uniprot_ac	Protein_name	Protein_desc	Gene.names
A0AVK6	A0AVK6_S102	NA	NA	A0AVK6	E2F8_HUMAN	Transcription factor E2F8 (E2F-8)	E2F8
A0FGR8	A0FGR8_S738	-0.25574	0.408326	A0FGR8	ESYT2_HUMAN	Extended synaptotagmin-2 (E-Syt2) (Chr2Syt)	ESYT2
A0FGR8	A0FGR8_S755,A0FGR8_S761	-4.19894	NA	A0FGR8	ESYT2_HUMAN	Extended synaptotagmin-2 (E-Syt2) (Chr2Syt)	ESYT2
A0FGR8	A0FGR8_T753	-4.6689	NA	A0FGR8	ESYT2_HUMAN	Extended synaptotagmin-2 (E-Syt2) (Chr2Syt)	ESYT2
A0FGR8	A0FGR8_T753,A0FGR8_S761	-6.55871	NA	A0FGR8	ESYT2_HUMAN	Extended synaptotagmin-2 (E-Syt2) (Chr2Syt)	ESYT2
A0JLT2	A0JLT2_S226	1.42304	NA	A0JLT2	MED19_HUMAN	Mediator of RNA polymerase II transcription subunit 19 (Lung cancer metastasis-related protein 1) (Mediator complex subunit 19)	MED19
A0JNW5	A0JNW5_S1394	0.108859	NA	A0JNW5	UH1BL_HUMAN	UHRF1-binding protein 1-like	UHRF1BP1L
A0JNW5	A0JNW5_S989	1.63291	NA	A0JNW5	UH1BL_HUMAN	UHRF1-binding protein 1-like	UHRF1BP1L
A0MZ66	A0MZ66_S492	NA	NA	A0MZ66	SHOT1_HUMAN	Shootin-1	KIAA1598
A1L170	A1L170_S222	-1.08136	0.0357324	A1L170	CA226_HUMAN	Uncharacterized protein C1orf226	C1orf226
A1L188	A1L188_S47	3.03256	NA	A1L188	CQ089_HUMAN	Uncharacterized protein C17orf89	C17orf89
A1L390	A1L390_S1037	-2.85034	NA	A1L390	PKHG3_HUMAN	Pleckstrin homology domain-containing family G member 3 (PH domain-containing family G member 3)	PLEKHG3
A1L390	A1L390_S1037,A1L390_S1040	-0.572489	NA	A1L390	PKHG3_HUMAN	Pleckstrin homology domain-containing family G member 3 (PH domain-containing family G member 3)	PLEKHG3
A1L390	A1L390_S1040	-0.419249	0.846557	A1L390	PKHG3_HUMAN	Pleckstrin homology domain-containing family G member 3 (PH domain-containing family G member 3)	PLEKHG3				0
A1L390	A1L390_S1154	-1.0098	0.235596	A1L390	PKHG3_HUMAN	Pleckstrin homology domain-containing family G member 3 (PH domain-containing family G member 3)	PLEKHG3
A1L390	A1L390_S1154,A1L390_T1156	1.13067	NA	A1L390	PKHG3_HUMAN	Pleckstrin homology domain-containing family G member 3 (PH domain-containing family G member 3)	PLEKHG3
A1L390	A1L390_S448	-0.605445	0.470714	A1L390	PKHG3_HUMAN	Pleckstrin homology domain-containing family G member 3 (PH domain-containing family G member 3)	PLEKHG3
A1L390	A1L390_S643	-0.697984	NA	A1L390	PKHG3_HUMAN	Pleckstrin homology domain-containing family G member 3 (PH domain-containing family G member 3)	PLEKHG3
A1L390	A1L390_S76	-0.806411	NA	A1L390	PKHG3_HUMAN	Pleckstrin homology domain-containing family G member 3 (PH domain-containing family G member 3)	PLEKHG3
A1X283	A1X283_S720	2.88271	NA	A1X283	SPD2B_HUMAN	SH3 and PX domain-containing protein 2B (Adapter protein HOFI) (Factor for adipocyte differentiation 49) (Tyrosine kinase substrate with four SH3 domains)	SH3PXD2B
A1X283	A1X283_S770	-0.954361	0.50072	A1X283	SPD2B_HUMAN	SH3 and PX domain-containing protein 2B (Adapter protein HOFI) (Factor for adipocyte differentiation 49) (Tyrosine kinase substrate with four SH3 domains)	SH3PXD2B
A2A3K4	A2A3K4_S392	NA	NA	A2A3K4	PTPC1_HUMAN	Protein tyrosine phosphatase domain-containing protein 1 (EC 3.1.3.-)	PTPDC1
A2AJT9	A2AJT9_S139	1.49493	NA	A2AJT9	CX023_HUMAN	Uncharacterized protein CXorf23	CXorf23
A4D1P6	A4D1P6_S293	2.37967	NA	A4D1P6	WDR91_HUMAN	WD repeat-containing protein 91	WDR91
A5YM69	A5YM69_S184	-1.06287	0.0899712	A5YM69	ARG35_HUMAN	Rho guanine nucleotide exchange factor 35 (Rho guanine nucleotide exchange factor 5-like protein)	ARHGEF35
A5YM69;Q12774	A5YM69_S57,Q12774_S57	0.571147	0.247658	A5YM69;Q12774	ARG35_HUMAN;ARHG5_HUMAN	Rho guanine nucleotide exchange factor 35 (Rho guanine nucleotide exchange factor 5-like protein);Rho guanine nucleotide exchange factor 5 (Ephexin-3) (Guanine nucleotide regulatory protein TIM) (Oncogene TIM) (Transforming immortalized mammary oncogene) (p60 TIM)	ARHGEF35;ARHGEF5
A6ND36	A6ND36_S356	0.488672	0.35153	A6ND36	FA83G_HUMAN	Protein FAM83G	FAM83G
A6ND36	A6ND36_S4	-0.589918	0.574985	A6ND36	FA83G_HUMAN	Protein FAM83G	FAM83G
A6ND36	A6ND36_S634	1.27735	0.0886925	A6ND36	FA83G_HUMAN	Protein FAM83G	FAM83G
A6ND36	A6ND36_S650	-1.3665	0.150519	A6ND36	FA83G_HUMAN	Protein FAM83G	FAM83G
A6ND36	A6ND36_S688	2.04215	0.17583	A6ND36	FA83G_HUMAN	Protein FAM83G	FAM83G
A6NDB9	A6NDB9_S375	0.00570955	0.996706	A6NDB9	PALM3_HUMAN	Paralemmin-3	PALM3
A6NDB9	A6NDB9_S544	-0.423302	0.474471	A6NDB9	PALM3_HUMAN	Paralemmin-3	PALM3
A6NFI3	A6NFI3_S10	-0.195723	0.866265	A6NFI3	ZN316_HUMAN	Zinc finger protein 316	ZNF316
A6NFI3	A6NFI3_S112	0.789444	0.404969	A6NFI3	ZN316_HUMAN	Zinc finger protein 316	ZNF316
A6NHR8	A6NHR8_T170,A6NHR8_T175	NA	NA	A6NHR8	FA47D_HUMAN	Putative protein FAM47D	FAM47DP
A6NHR9	A6NHR9_S1697	3.44156	NA	A6NHR9	SMHD1_HUMAN	Structural maintenance of chromosomes flexible hinge domain-containing protein 1 (SMC hinge domain-containing protein 1)	SMCHD1
A6NHR9	A6NHR9_S1974	2.71869	NA	A6NHR9	SMHD1_HUMAN	Structural maintenance of chromosomes flexible hinge domain-containing protein 1 (SMC hinge domain-containing protein 1)	SMCHD1
A6NHT5	A6NHT5_S180	-0.0520447	NA	A6NHT5	HMX3_HUMAN	Homeobox protein HMX3 (Homeobox protein H6 family member 3) (Homeobox protein Nkx-5.1)	HMX3
A6NJB7	A6NJB7_S109	NA	NA	A6NJB7	PRR19_HUMAN	Proline-rich protein 19	PRR19
A6NKD9	A6NKD9_S178	NA	NA	A6NKD9	CC85C_HUMAN	Coiled-coil domain-containing protein 85C	CCDC85C
A6NKD9	A6NKD9_S246	-0.35227	0.615573	A6NKD9	CC85C_HUMAN	Coiled-coil domain-containing protein 85C	CCDC85C
A6NKD9	A6NKD9_S258	-1.16443	0.00250788	A6NKD9	CC85C_HUMAN	Coiled-coil domain-containing protein 85C	CCDC85C
A6NKF1	A6NKF1_S402	NA	NA	A6NKF1	SAC31_HUMAN	SAC3 domain-containing protein 1 (SAC3 homology domain-containing protein 1)	SAC3D1
A7E2V4	A7E2V4_S567	2.16397	NA	A7E2V4	ZSWM8_HUMAN	Zinc finger SWIM domain-containing protein 8	ZSWIM8
A7KAX9	A7KAX9_S1796	-0.353442	NA	A7KAX9	RHG32_HUMAN	Rho GTPase-activating protein 32 (Brain-specific Rho GTPase-activating protein) (GAB-associated Cdc42/Rac GTPase-activating protein) (GC-GAP) (GTPase regulator interacting with TrkA) (Rho-type GTPase-activating protein 32) (Rho/Cdc42/Rac GTPase-activating protein RICS) (RhoGAP involved in the beta-catenin-N-cadherin and NMDA receptor signaling) (p200RhoGAP) (p250GAP)	ARHGAP32
A7KAX9	A7KAX9_S706	-0.656422	0.0670515	A7KAX9	RHG32_HUMAN	Rho GTPase-activating protein 32 (Brain-specific Rho GTPase-activating protein) (GAB-associated Cdc42/Rac GTPase-activating protein) (GC-GAP) (GTPase regulator interacting with TrkA) (Rho-type GTPase-activating protein 32) (Rho/Cdc42/Rac GTPase-activating protein RICS) (RhoGAP involved in the beta-catenin-N-cadherin and NMDA receptor signaling) (p200RhoGAP) (p250GAP)	ARHGAP32
A7KAX9	A7KAX9_S856	NA	NA	A7KAX9	RHG32_HUMAN	Rho GTPase-activating protein 32 (Brain-specific Rho GTPase-activating protein) (GAB-associated Cdc42/Rac GTPase-activating protein) (GC-GAP) (GTPase regulator interacting with TrkA) (Rho-type GTPase-activating protein 32) (Rho/Cdc42/Rac GTPase-activating protein RICS) (RhoGAP involved in the beta-catenin-N-cadherin and NMDA receptor signaling) (p200RhoGAP) (p250GAP)	ARHGAP32
A7KAX9	A7KAX9_S871	NA	NA	A7KAX9	RHG32_HUMAN	Rho GTPase-activating protein 32 (Brain-specific Rho GTPase-activating protein) (GAB-associated Cdc42/Rac GTPase-activating protein) (GC-GAP) (GTPase regulator interacting with TrkA) (Rho-type GTPase-activating protein 32) (Rho/Cdc42/Rac GTPase-activating protein RICS) (RhoGAP involved in the beta-catenin-N-cadherin and NMDA receptor signaling) (p200RhoGAP) (p250GAP)	ARHGAP32
A7KAX9	A7KAX9_T949	-0.642867	NA	A7KAX9	RHG32_HUMAN	Rho GTPase-activating protein 32 (Brain-specific Rho GTPase-activating protein) (GAB-associated Cdc42/Rac GTPase-activating protein) (GC-GAP) (GTPase regulator interacting with TrkA) (Rho-type GTPase-activating protein 32) (Rho/Cdc42/Rac GTPase-activating protein RICS) (RhoGAP involved in the beta-catenin-N-cadherin and NMDA receptor signaling) (p200RhoGAP) (p250GAP)	ARHGAP32
A8CG34;Q96HA1	A8CG34_S357,Q96HA1_S380	1.32388	NA	A8CG34;Q96HA1	P121C_HUMAN;P121A_HUMAN	Nuclear envelope pore membrane protein POM 121C (Nuclear pore membrane protein 121-2) (POM121-2) (Pore membrane protein of 121 kDa C);Nuclear envelope pore membrane protein POM 121 (Nuclear envelope pore membrane protein POM 121A) (Nucleoporin Nup121) (Pore membrane protein of 121 kDa)	POM121C;POM121
A8CG34;Q96HA1;A6NF01	A8CG34_S422,A8CG34_T424,Q96HA1_S445,Q96HA1_T447,A6NF01_S29,A6NF01_T31	0.686092	0.655171	A6NF01;A8CG34;Q96HA1	P121B_HUMAN;P121C_HUMAN;P121A_HUMAN	Putative nuclear envelope pore membrane protein POM 121B;Nuclear envelope pore membrane protein POM 121C (Nuclear pore membrane protein 121-2) (POM121-2) (Pore membrane protein of 121 kDa C);Nuclear envelope pore membrane protein POM 121 (Nuclear envelope pore membrane protein POM 121A) (Nucleoporin Nup121) (Pore membrane protein of 121 kDa)	POM121B;POM121C;POM121
A8CG34;Q96HA1;A6NF01	A8CG34_T424,Q96HA1_T447,A6NF01_T31	1.09228	NA	A6NF01;A8CG34;Q96HA1	P121B_HUMAN;P121C_HUMAN;P121A_HUMAN	Putative nuclear envelope pore membrane protein POM 121B;Nuclear envelope pore membrane protein POM 121C (Nuclear pore membrane protein 121-2) (POM121-2) (Pore membrane protein of 121 kDa C);Nuclear envelope pore membrane protein POM 121 (Nuclear envelope pore membrane protein POM 121A) (Nucleoporin Nup121) (Pore membrane protein of 121 kDa)	POM121B;POM121C;POM121
A8MT19;Q8IUC4	A8MT19_S549,Q8IUC4_S652	-2.42815	0.209447	A8MT19;Q8IUC4	RHN2P_HUMAN;RHPN2_HUMAN	Putative rhophilin-2-like protein RHPN2P1 (Rhophilin-2 pseudogene 1);Rhophilin-2 (76 kDa RhoB effector protein) (GTP-Rho-binding protein 2) (p76RBE)	RHPN2P1;RHPN2
A8MUU9;Q9UF83	A8MUU9_S321,Q9UF83_S519	NA	NA	A8MUU9;Q9UF83	YV023_HUMAN;YM012_HUMAN	Putative uncharacterized protein ENSP00000383309;Uncharacterized protein DKFZp434B061	;
A8MVW0	A8MVW0_S780	3.31347	NA	A8MVW0	F1712_HUMAN	Protein FAM171A2	FAM171A2
A8MVW0	A8MVW0_S789	NA	NA	A8MVW0	F1712_HUMAN	Protein FAM171A2	FAM171A2
B7ZBB8	B7ZBB8_S60	-1.47971	NA	B7ZBB8	PP13G_HUMAN	Protein phosphatase 1 regulatory subunit 3G	PPP1R3G
C9JLW8	C9JLW8_S21	-1.52747	0.0453441	C9JLW8	F195B_HUMAN	Protein FAM195B	FAM195B
C9JLW8	C9JLW8_T16	-0.122745	0.80734	C9JLW8	F195B_HUMAN	Protein FAM195B	FAM195B
M0R1G4	M0R1G4_S49	-0.95925	NA	NA	NA	NA	NA
O00116	O00116_S65	0.418684	NA	O00116	ADAS_HUMAN	Alkyldihydroxyacetonephosphate synthase, peroxisomal (Alkyl-DHAP synthase) (EC 2.5.1.26) (Aging-associated gene 5 protein) (Alkylglycerone-phosphate synthase)	AGPS
O00139	O00139_S140	NA	NA	O00139	KIF2A_HUMAN	Kinesin-like protein KIF2A (Kinesin-2) (hK2)	KIF2A
O00159	O00159_S864	-1.1152	0.059866	O00159	MYO1C_HUMAN	Unconventional myosin-Ic (Myosin I beta) (MMI-beta) (MMIb)	MYO1C
O00161	O00161_S23	NA	NA	O00161	SNP23_HUMAN	Synaptosomal-associated protein 23 (SNAP-23) (Vesicle-membrane fusion protein SNAP-23)	SNAP23
O00161	O00161_T101	0.0503408	NA	O00161	SNP23_HUMAN	Synaptosomal-associated protein 23 (SNAP-23) (Vesicle-membrane fusion protein SNAP-23)	SNAP23
O00178	O00178_S24	-1.05682	NA	O00178	GTPB1_HUMAN	GTP-binding protein 1 (G-protein 1) (GP-1) (GP1)	GTPBP1
O00192	O00192_S343	0.213301	NA	O00192	ARVC_HUMAN	Armadillo repeat protein deleted in velo-cardio-facial syndrome	ARVCF
O00192	O00192_S345	1.16732	NA	O00192	ARVC_HUMAN	Armadillo repeat protein deleted in velo-cardio-facial syndrome	ARVCF
O00193	O00193_S147	-0.023591	0.92497	O00193	SMAP_HUMAN	Small acidic protein	SMAP
O00193	O00193_S15	0.53676	0.718002	O00193	SMAP_HUMAN	Small acidic protein	SMAP
O00193	O00193_S17	1.31185	0.450343	O00193	SMAP_HUMAN	Small acidic protein	SMAP
O00193	O00193_S24	-3.66515	NA	O00193	SMAP_HUMAN	Small acidic protein	SMAP
O00203	O00203_S276	0.415719	NA	O00203	AP3B1_HUMAN	AP-3 complex subunit beta-1 (Adapter-related protein complex 3 subunit beta-1) (Adaptor protein complex AP-3 subunit beta-1) (Beta-3A-adaptin) (Clathrin assembly protein complex 3 beta-1 large chain)	AP3B1
O00231	O00231_S23	NA	NA	O00231	PSD11_HUMAN	26S proteasome non-ATPase regulatory subunit 11 (26S proteasome regulatory subunit RPN6) (26S proteasome regulatory subunit S9) (26S proteasome regulatory subunit p44.5)	PSMD11
O00257	O00257_S415	0.688711	NA	O00257	CBX4_HUMAN	E3 SUMO-protein ligase CBX4 (EC 6.3.2.-) (Chromobox protein homolog 4) (Polycomb 2 homolog) (Pc2) (hPc2)	CBX4
O00264	O00264_S181	-0.202494	0.631126	O00264	PGRC1_HUMAN	Membrane-associated progesterone receptor component 1 (mPR)	PGRMC1
O00268	O00268_S109	0.268438	0.713286	O00268	TAF4_HUMAN	Transcription initiation factor TFIID subunit 4 (RNA polymerase II TBP-associated factor subunit C) (TBP-associated factor 4) (Transcription initiation factor TFIID 130 kDa subunit) (TAF(II)130) (TAFII-130) (TAFII130) (Transcription initiation factor TFIID 135 kDa subunit) (TAF(II)135) (TAFII-135) (TAFII135)	TAF4
O00268	O00268_S543	-1.07719	0.60498	O00268	TAF4_HUMAN	Transcription initiation factor TFIID subunit 4 (RNA polymerase II TBP-associated factor subunit C) (TBP-associated factor 4) (Transcription initiation factor TFIID 130 kDa subunit) (TAF(II)130) (TAFII-130) (TAFII130) (Transcription initiation factor TFIID 135 kDa subunit) (TAF(II)135) (TAFII-135) (TAFII135)	TAF4
O00273	O00273_S110	-1.40214	NA	O00273	DFFA_HUMAN	DNA fragmentation factor subunit alpha (DNA fragmentation factor 45 kDa subunit) (DFF-45) (Inhibitor of CAD) (ICAD)	DFFA
O00273	O00273_S310	-0.677686	0.492369	O00273	DFFA_HUMAN	DNA fragmentation factor subunit alpha (DNA fragmentation factor 45 kDa subunit) (DFF-45) (Inhibitor of CAD) (ICAD)	DFFA
O00273	O00273_S315	-0.409197	0.659291	O00273	DFFA_HUMAN	DNA fragmentation factor subunit alpha (DNA fragmentation factor 45 kDa subunit) (DFF-45) (Inhibitor of CAD) (ICAD)	DFFA
O00273	O00273_T231	-4.31005	NA	O00273	DFFA_HUMAN	DNA fragmentation factor subunit alpha (DNA fragmentation factor 45 kDa subunit) (DFF-45) (Inhibitor of CAD) (ICAD)	DFFA
O00418	O00418_S18	0.305173	0.661931	O00418	EF2K_HUMAN	Eukaryotic elongation factor 2 kinase (eEF-2 kinase) (eEF-2K) (EC 2.7.11.20) (Calcium/calmodulin-dependent eukaryotic elongation factor 2 kinase)	EEF2K
O00418	O00418_S445	2.20068	NA	O00418	EF2K_HUMAN	Eukaryotic elongation factor 2 kinase (eEF-2 kinase) (eEF-2K) (EC 2.7.11.20) (Calcium/calmodulin-dependent eukaryotic elongation factor 2 kinase)	EEF2K
O00418	O00418_S474	NA	NA	O00418	EF2K_HUMAN	Eukaryotic elongation factor 2 kinase (eEF-2 kinase) (eEF-2K) (EC 2.7.11.20) (Calcium/calmodulin-dependent eukaryotic elongation factor 2 kinase)	EEF2K
O00425	O00425_S184	5.59333	NA	O00425	IF2B3_HUMAN	Insulin-like growth factor 2 mRNA-binding protein 3 (IGF2 mRNA-binding protein 3) (IMP-3) (IGF-II mRNA-binding protein 3) (KH domain-containing protein overexpressed in cancer) (hKOC) (VICKZ family member 3)	IGF2BP3
O00429	O00429_S616	-1.23714	0.589593	O00429	DNM1L_HUMAN	Dynamin-1-like protein (EC 3.6.5.5) (Dnm1p/Vps1p-like protein) (DVLP) (Dynamin family member proline-rich carboxyl-terminal domain less) (Dymple) (Dynamin-like protein) (Dynamin-like protein 4) (Dynamin-like protein IV) (HdynIV) (Dynamin-related protein 1)	DNM1L
O00443	O00443_S259	NA	NA	O00443	P3C2A_HUMAN	Phosphatidylinositol 4-phosphate 3-kinase C2 domain-containing subunit alpha (PI3K-C2-alpha) (PtdIns-3-kinase C2 subunit alpha) (EC 2.7.1.154) (Phosphoinositide 3-kinase-C2-alpha)	PIK3C2A
O00461	O00461_S583	1.44469	NA	O00461	GOLI4_HUMAN	Golgi integral membrane protein 4 (Golgi integral membrane protein, cis) (GIMPc) (Golgi phosphoprotein 4) (Golgi-localized phosphoprotein of 130 kDa) (Golgi phosphoprotein of 130 kDa)	GOLIM4
O00470	O00470_S194	0.0649541	NA	O00470	MEIS1_HUMAN	Homeobox protein Meis1	MEIS1
O00472	O00472_S316	NA	NA	O00472	ELL2_HUMAN	RNA polymerase II elongation factor ELL2	ELL2
O00499	O00499_S298	-1.76243	0.0493556	O00499	BIN1_HUMAN	Myc box-dependent-interacting protein 1 (Amphiphysin II) (Amphiphysin-like protein) (Box-dependent myc-interacting protein 1) (Bridging integrator 1)	BIN1
O00499	O00499_S303	-0.60176	NA	O00499	BIN1_HUMAN	Myc box-dependent-interacting protein 1 (Amphiphysin II) (Amphiphysin-like protein) (Box-dependent myc-interacting protein 1) (Bridging integrator 1)	BIN1
O00499	O00499_S331	-2.39965	0.212677	O00499	BIN1_HUMAN	Myc box-dependent-interacting protein 1 (Amphiphysin II) (Amphiphysin-like protein) (Box-dependent myc-interacting protein 1) (Bridging integrator 1)	BIN1
O00505	O00505_S60	-0.637089	NA	O00505	IMA3_HUMAN	Importin subunit alpha-3 (Importin alpha Q2) (Qip2) (Karyopherin subunit alpha-3) (SRP1-gamma)	KPNA3
O00512	O00512_S687	-1.30626	0.245952	O00512	BCL9_HUMAN	B-cell CLL/lymphoma 9 protein (B-cell lymphoma 9 protein) (Bcl-9) (Protein legless homolog)	BCL9
O00559	O00559_S36	-0.77535	0.442078	O00559	RCAS1_HUMAN	Receptor-binding cancer antigen expressed on SiSo cells (Cancer-associated surface antigen RCAS1) (Estrogen receptor-binding fragment-associated gene 9 protein)	EBAG9
O00562	O00562_S373	NA	NA	O00562	PITM1_HUMAN	Membrane-associated phosphatidylinositol transfer protein 1 (Drosophila retinal degeneration B homolog) (Phosphatidylinositol transfer protein, membrane-associated 1) (PITPnm 1) (Pyk2 N-terminal domain-interacting receptor 2) (NIR-2)	PITPNM1
O00567	O00567_S461	-5.76769	NA	O00567	NOP56_HUMAN	Nucleolar protein 56 (Nucleolar protein 5A)	NOP56
O00567	O00567_S466	-3.04257	NA	O00567	NOP56_HUMAN	Nucleolar protein 56 (Nucleolar protein 5A)	NOP56
O00567	O00567_S519	-1.53302	NA	O00567	NOP56_HUMAN	Nucleolar protein 56 (Nucleolar protein 5A)	NOP56
O00567	O00567_S520	NA	NA	O00567	NOP56_HUMAN	Nucleolar protein 56 (Nucleolar protein 5A)	NOP56
O00567	O00567_S537	0.566416	0.39908	O00567	NOP56_HUMAN	Nucleolar protein 56 (Nucleolar protein 5A)	NOP56
O00567	O00567_S554	0.314533	NA	O00567	NOP56_HUMAN	Nucleolar protein 56 (Nucleolar protein 5A)	NOP56
O00567	O00567_S569	-0.128293	NA	O00567	NOP56_HUMAN	Nucleolar protein 56 (Nucleolar protein 5A)	NOP56
O00567	O00567_S569,O00567_S570	0.761246	0.415913	O00567	NOP56_HUMAN	Nucleolar protein 56 (Nucleolar protein 5A)	NOP56
O00567	O00567_S570	-0.725376	NA	O00567	NOP56_HUMAN	Nucleolar protein 56 (Nucleolar protein 5A)	NOP56
O00571	O00571_S90	NA	NA	O00571	DDX3X_HUMAN	ATP-dependent RNA helicase DDX3X (EC 3.6.4.13) (DEAD box protein 3, X-chromosomal) (DEAD box, X isoform) (Helicase-like protein 2) (HLP2)	DDX3X
O00592	O00592_S529	-0.636027	NA	O00592	PODXL_HUMAN	Podocalyxin (GCTM-2 antigen) (Gp200) (Podocalyxin-like protein 1) (PC) (PCLP-1)	PODXL
O00629	O00629_S60	0.0807126	NA	O00629	IMA4_HUMAN	Importin subunit alpha-4 (Importin alpha Q1) (Qip1) (Karyopherin subunit alpha-4)	KPNA4
O14497	O14497_S1182	NA	NA	O14497	ARI1A_HUMAN	AT-rich interactive domain-containing protein 1A (ARID domain-containing protein 1A) (B120) (BRG1-associated factor 250) (BAF250) (BRG1-associated factor 250a) (BAF250A) (Osa homolog 1) (hOSA1) (SWI-like protein) (SWI/SNF complex protein p270) (SWI/SNF-related, matrix-associated, actin-dependent regulator of chromatin subfamily F member 1) (hELD)	ARID1A
O14497	O14497_S1184	0.174056	NA	O14497	ARI1A_HUMAN	AT-rich interactive domain-containing protein 1A (ARID domain-containing protein 1A) (B120) (BRG1-associated factor 250) (BAF250) (BRG1-associated factor 250a) (BAF250A) (Osa homolog 1) (hOSA1) (SWI-like protein) (SWI/SNF complex protein p270) (SWI/SNF-related, matrix-associated, actin-dependent regulator of chromatin subfamily F member 1) (hELD)	ARID1A
O14497	O14497_S1754	NA	NA	O14497	ARI1A_HUMAN	AT-rich interactive domain-containing protein 1A (ARID domain-containing protein 1A) (B120) (BRG1-associated factor 250) (BAF250) (BRG1-associated factor 250a) (BAF250A) (Osa homolog 1) (hOSA1) (SWI-like protein) (SWI/SNF complex protein p270) (SWI/SNF-related, matrix-associated, actin-dependent regulator of chromatin subfamily F member 1) (hELD)	ARID1A
O14497	O14497_S363	0.294427	NA	O14497	ARI1A_HUMAN	AT-rich interactive domain-containing protein 1A (ARID domain-containing protein 1A) (B120) (BRG1-associated factor 250) (BAF250) (BRG1-associated factor 250a) (BAF250A) (Osa homolog 1) (hOSA1) (SWI-like protein) (SWI/SNF complex protein p270) (SWI/SNF-related, matrix-associated, actin-dependent regulator of chromatin subfamily F member 1) (hELD)	ARID1A
O14497	O14497_S696	-0.714343	NA	O14497	ARI1A_HUMAN	AT-rich interactive domain-containing protein 1A (ARID domain-containing protein 1A) (B120) (BRG1-associated factor 250) (BAF250) (BRG1-associated factor 250a) (BAF250A) (Osa homolog 1) (hOSA1) (SWI-like protein) (SWI/SNF complex protein p270) (SWI/SNF-related, matrix-associated, actin-dependent regulator of chromatin subfamily F member 1) (hELD)	ARID1A
O14497	O14497_S772	-1.97133	NA	O14497	ARI1A_HUMAN	AT-rich interactive domain-containing protein 1A (ARID domain-containing protein 1A) (B120) (BRG1-associated factor 250) (BAF250) (BRG1-associated factor 250a) (BAF250A) (Osa homolog 1) (hOSA1) (SWI-like protein) (SWI/SNF complex protein p270) (SWI/SNF-related, matrix-associated, actin-dependent regulator of chromatin subfamily F member 1) (hELD)	ARID1A
O14497	O14497_T1599	-1.92896	NA	O14497	ARI1A_HUMAN	AT-rich interactive domain-containing protein 1A (ARID domain-containing protein 1A) (B120) (BRG1-associated factor 250) (BAF250) (BRG1-associated factor 250a) (BAF250A) (Osa homolog 1) (hOSA1) (SWI-like protein) (SWI/SNF complex protein p270) (SWI/SNF-related, matrix-associated, actin-dependent regulator of chromatin subfamily F member 1) (hELD)	ARID1A
O14523	O14523_S411	-2.04991	NA	O14523	C2C2L_HUMAN	C2 domain-containing protein 2-like (Transmembrane protein 24)	C2CD2L
O14523	O14523_S464,O14523_S466	NA	NA	O14523	C2C2L_HUMAN	C2 domain-containing protein 2-like (Transmembrane protein 24)	C2CD2L
O14523	O14523_S466	0.186048	NA	O14523	C2C2L_HUMAN	C2 domain-containing protein 2-like (Transmembrane protein 24)	C2CD2L
O14523	O14523_S606	NA	NA	O14523	C2C2L_HUMAN	C2 domain-containing protein 2-like (Transmembrane protein 24)	C2CD2L
O14523	O14523_S660	-1.43642	NA	O14523	C2C2L_HUMAN	C2 domain-containing protein 2-like (Transmembrane protein 24)	C2CD2L
O14545	O14545_S325	NA	NA	O14545	TRAD1_HUMAN	TRAF-type zinc finger domain-containing protein 1 (Protein FLN29)	TRAFD1
O14545	O14545_S415	-0.866563	0.196717	O14545	TRAD1_HUMAN	TRAF-type zinc finger domain-containing protein 1 (Protein FLN29)	TRAFD1
O14578	O14578_S1971	0.912003	0.286395	O14578	CTRO_HUMAN	Citron Rho-interacting kinase (CRIK) (EC 2.7.11.1) (Serine/threonine-protein kinase 21)	CIT
O14578	O14578_S1993	-0.418992	0.52521	O14578	CTRO_HUMAN	Citron Rho-interacting kinase (CRIK) (EC 2.7.11.1) (Serine/threonine-protein kinase 21)	CIT
O14578	O14578_S480	0.350892	NA	O14578	CTRO_HUMAN	Citron Rho-interacting kinase (CRIK) (EC 2.7.11.1) (Serine/threonine-protein kinase 21)	CIT
O14579	O14579_S99	1.73037	0.0140034	O14579	COPE_HUMAN	Coatomer subunit epsilon (Epsilon-coat protein) (Epsilon-COP)	COPE
O14617	O14617_S658	0.436365	0.496774	O14617	AP3D1_HUMAN	AP-3 complex subunit delta-1 (AP-3 complex subunit delta) (Adapter-related protein complex 3 subunit delta-1) (Delta-adaptin)	AP3D1
O14618	O14618_S267	0.229177	NA	O14618	CCS_HUMAN	Copper chaperone for superoxide dismutase (Superoxide dismutase copper chaperone)	CCS
O14639	O14639_S431	-0.0731684	0.79211	O14639	ABLM1_HUMAN	Actin-binding LIM protein 1 (abLIM-1) (Actin-binding LIM protein family member 1) (Actin-binding double zinc finger protein) (LIMAB1) (Limatin)	ABLIM1
O14639	O14639_S452	-0.561695	0.368453	O14639	ABLM1_HUMAN	Actin-binding LIM protein 1 (abLIM-1) (Actin-binding LIM protein family member 1) (Actin-binding double zinc finger protein) (LIMAB1) (Limatin)	ABLIM1
O14639	O14639_S655	-1.3557	NA	O14639	ABLM1_HUMAN	Actin-binding LIM protein 1 (abLIM-1) (Actin-binding LIM protein family member 1) (Actin-binding double zinc finger protein) (LIMAB1) (Limatin)	ABLIM1
O14639	O14639_S677	NA	NA	O14639	ABLM1_HUMAN	Actin-binding LIM protein 1 (abLIM-1) (Actin-binding LIM protein family member 1) (Actin-binding double zinc finger protein) (LIMAB1) (Limatin)	ABLIM1
O14646	O14646_S1673	1.49336	NA	O14646	CHD1_HUMAN	Chromodomain-helicase-DNA-binding protein 1 (CHD-1) (EC 3.6.4.12) (ATP-dependent helicase CHD1)	CHD1
O14646	O14646_S1677	2.1938	NA	O14646	CHD1_HUMAN	Chromodomain-helicase-DNA-binding protein 1 (CHD-1) (EC 3.6.4.12) (ATP-dependent helicase CHD1)	CHD1
O14646	O14646_T1394	0.252018	0.428099	O14646	CHD1_HUMAN	Chromodomain-helicase-DNA-binding protein 1 (CHD-1) (EC 3.6.4.12) (ATP-dependent helicase CHD1)	CHD1
O14647	O14647_S1365	-0.215447	NA	O14647	CHD2_HUMAN	Chromodomain-helicase-DNA-binding protein 2 (CHD-2) (EC 3.6.4.12) (ATP-dependent helicase CHD2)	CHD2
O14647	O14647_S1728	0.596204	0.501059	O14647	CHD2_HUMAN	Chromodomain-helicase-DNA-binding protein 2 (CHD-2) (EC 3.6.4.12) (ATP-dependent helicase CHD2)	CHD2
O14681	O14681_S46	0.907004	0.350919	O14681	EI24_HUMAN	Etoposide-induced protein 2.4 homolog (p53-induced gene 8 protein)	EI24
O14713	O14713_S36	-0.937132	NA	O14713	ITBP1_HUMAN	Integrin beta-1-binding protein 1 (Integrin cytoplasmic domain-associated protein 1) (ICAP-1)	ITGB1BP1
O14737	O14737_S119	0.749747	0.214758	O14737	PDCD5_HUMAN	Programmed cell death protein 5 (TF-1 cell apoptosis-related protein 19) (Protein TFAR19)	PDCD5
O14745	O14745_S2	1.38155	0.254173	O14745	NHRF1_HUMAN	Na(+)/H(+) exchange regulatory cofactor NHE-RF1 (NHERF-1) (Ezrin-radixin-moesin-binding phosphoprotein 50) (EBP50) (Regulatory cofactor of Na(+)/H(+) exchanger) (Sodium-hydrogen exchanger regulatory factor 1) (Solute carrier family 9 isoform A3 regulatory factor 1)	SLC9A3R1
O14745	O14745_S280	-2.11931	NA	O14745	NHRF1_HUMAN	Na(+)/H(+) exchange regulatory cofactor NHE-RF1 (NHERF-1) (Ezrin-radixin-moesin-binding phosphoprotein 50) (EBP50) (Regulatory cofactor of Na(+)/H(+) exchanger) (Sodium-hydrogen exchanger regulatory factor 1) (Solute carrier family 9 isoform A3 regulatory factor 1)	SLC9A3R1
O14745	O14745_S288	NA	NA	O14745	NHRF1_HUMAN	Na(+)/H(+) exchange regulatory cofactor NHE-RF1 (NHERF-1) (Ezrin-radixin-moesin-binding phosphoprotein 50) (EBP50) (Regulatory cofactor of Na(+)/H(+) exchanger) (Sodium-hydrogen exchanger regulatory factor 1) (Solute carrier family 9 isoform A3 regulatory factor 1)	SLC9A3R1
O14745	O14745_S290	-0.746947	NA	O14745	NHRF1_HUMAN	Na(+)/H(+) exchange regulatory cofactor NHE-RF1 (NHERF-1) (Ezrin-radixin-moesin-binding phosphoprotein 50) (EBP50) (Regulatory cofactor of Na(+)/H(+) exchanger) (Sodium-hydrogen exchanger regulatory factor 1) (Solute carrier family 9 isoform A3 regulatory factor 1)	SLC9A3R1
O14757	O14757_S296	-0.722162	NA	O14757	CHK1_HUMAN	Serine/threonine-protein kinase Chk1 (EC 2.7.11.1) (CHK1 checkpoint homolog) (Cell cycle checkpoint kinase) (Checkpoint kinase-1)	CHEK1
O14757	O14757_S308	-2.4931	NA	O14757	CHK1_HUMAN	Serine/threonine-protein kinase Chk1 (EC 2.7.11.1) (CHK1 checkpoint homolog) (Cell cycle checkpoint kinase) (Checkpoint kinase-1)	CHEK1
O14770	O14770_S198	-0.314537	NA	O14770	MEIS2_HUMAN	Homeobox protein Meis2 (Meis1-related protein 1)	MEIS2
O14777	O14777_S66	NA	NA	O14777	NDC80_HUMAN	Kinetochore protein NDC80 homolog (Highly expressed in cancer protein) (Kinetochore protein Hec1) (HsHec1) (Kinetochore-associated protein 2) (Retinoblastoma-associated protein HEC)	NDC80
O14795	O14795_S254	1.39288	NA	O14795	UN13B_HUMAN	Protein unc-13 homolog B (Munc13-2) (munc13)	UNC13B
O14828	O14828_S76	1.36896	0.193635	O14828	SCAM3_HUMAN	Secretory carrier-associated membrane protein 3 (Secretory carrier membrane protein 3)	SCAMP3
O14867	O14867_S445	0.520248	0.595319	O14867	BACH1_HUMAN	Transcription regulator protein BACH1 (BTB and CNC homolog 1) (HA2303)	BACH1
O14874	O14874_S31	0.512356	0.0117539	O14874	BCKD_HUMAN	[3-methyl-2-oxobutanoate dehydrogenase [lipoamide]] kinase, mitochondrial (EC 2.7.11.4) (Branched-chain alpha-ketoacid dehydrogenase kinase) (BCKD-kinase) (BCKDHKIN)	BCKDK
O14874	O14874_S33	-0.0835072	NA	O14874	BCKD_HUMAN	[3-methyl-2-oxobutanoate dehydrogenase [lipoamide]] kinase, mitochondrial (EC 2.7.11.4) (Branched-chain alpha-ketoacid dehydrogenase kinase) (BCKD-kinase) (BCKDHKIN)	BCKDK
O14908	O14908_S232	0.186178	0.780141	O14908	GIPC1_HUMAN	PDZ domain-containing protein GIPC1 (GAIP C-terminus-interacting protein) (RGS-GAIP-interacting protein) (RGS19-interacting protein 1) (Tax interaction protein 2) (TIP-2)	GIPC1
O14929	O14929_S361	-0.343259	0.647953	O14929	HAT1_HUMAN	Histone acetyltransferase type B catalytic subunit (EC 2.3.1.48) (Histone acetyltransferase 1)	HAT1
O14967	O14967_S560	0.467881	NA	O14967	CLGN_HUMAN	Calmegin	CLGN
O14974	O14974_S422	-0.134517	0.775374	O14974	MYPT1_HUMAN	Protein phosphatase 1 regulatory subunit 12A (Myosin phosphatase-targeting subunit 1) (Myosin phosphatase target subunit 1) (Protein phosphatase myosin-binding subunit)	PPP1R12A
O14974	O14974_S871	-0.210921	0.482418	O14974	MYPT1_HUMAN	Protein phosphatase 1 regulatory subunit 12A (Myosin phosphatase-targeting subunit 1) (Myosin phosphatase target subunit 1) (Protein phosphatase myosin-binding subunit)	PPP1R12A
O14976	O14976_S780	0.214545	NA	O14976	GAK_HUMAN	Cyclin-G-associated kinase (EC 2.7.11.1)	GAK
O14976	O14976_S829	-0.340266	NA	O14976	GAK_HUMAN	Cyclin-G-associated kinase (EC 2.7.11.1)	GAK
O14981	O14981_S234,O14981_T238	0.370355	NA	O14981	BTAF1_HUMAN	TATA-binding protein-associated factor 172 (EC 3.6.4.-) (ATP-dependent helicase BTAF1) (B-TFIID transcription factor-associated 170 kDa subunit) (TAF(II)170) (TBP-associated factor 172) (TAF-172)	BTAF1
O15013	O15013_S1283	-1.67395	NA	O15013	ARHGA_HUMAN	Rho guanine nucleotide exchange factor 10	ARHGEF10
O15013	O15013_S1283,O15013_S1284	-0.581812	0.365768	O15013	ARHGA_HUMAN	Rho guanine nucleotide exchange factor 10	ARHGEF10
O15013	O15013_S1284	NA	NA	O15013	ARHGA_HUMAN	Rho guanine nucleotide exchange factor 10	ARHGEF10
O15014	O15014_S1313	0.351507	NA	O15014	ZN609_HUMAN	Zinc finger protein 609	ZNF609
O15014	O15014_S413	1.12387	0.291018	O15014	ZN609_HUMAN	Zinc finger protein 609	ZNF609
O15014	O15014_S467	0.0803608	0.954984	O15014	ZN609_HUMAN	Zinc finger protein 609	ZNF609
O15014	O15014_S491	-0.485757	0.460149	O15014	ZN609_HUMAN	Zinc finger protein 609	ZNF609
O15014	O15014_S560	NA	NA	O15014	ZN609_HUMAN	Zinc finger protein 609	ZNF609
O15014	O15014_S576	-0.843689	0.399309	O15014	ZN609_HUMAN	Zinc finger protein 609	ZNF609
O15014	O15014_S576,O15014_S578	-0.35867	0.358993	O15014	ZN609_HUMAN	Zinc finger protein 609	ZNF609
O15014	O15014_S842	-0.580209	NA	O15014	ZN609_HUMAN	Zinc finger protein 609	ZNF609
O15014	O15014_T840	-0.80344	0.535153	O15014	ZN609_HUMAN	Zinc finger protein 609	ZNF609
O15015	O15015_S1440	-0.111536	NA	O15015	ZN646_HUMAN	Zinc finger protein 646	ZNF646
O15020	O15020_S2171	-0.0928074	NA	O15020	SPTN2_HUMAN	Spectrin beta chain, non-erythrocytic 2 (Beta-III spectrin) (Spinocerebellar ataxia 5 protein)	SPTBN2
O15021	O15021_S137	1.54042	0.259322	O15021	MAST4_HUMAN	Microtubule-associated serine/threonine-protein kinase 4 (EC 2.7.11.1)	MAST4
O15021	O15021_S1373	0.0731822	0.958766	O15021	MAST4_HUMAN	Microtubule-associated serine/threonine-protein kinase 4 (EC 2.7.11.1)	MAST4
O15021	O15021_S1470	0.0286296	0.963028	O15021	MAST4_HUMAN	Microtubule-associated serine/threonine-protein kinase 4 (EC 2.7.11.1)	MAST4
O15021	O15021_S1782	-1.13646	0.47496	O15021	MAST4_HUMAN	Microtubule-associated serine/threonine-protein kinase 4 (EC 2.7.11.1)	MAST4
O15021	O15021_S206	0.470362	NA	O15021	MAST4_HUMAN	Microtubule-associated serine/threonine-protein kinase 4 (EC 2.7.11.1)	MAST4
O15021	O15021_S266	-2.98235	NA	O15021	MAST4_HUMAN	Microtubule-associated serine/threonine-protein kinase 4 (EC 2.7.11.1)	MAST4
O15027	O15027_S1149	-1.05453	0.573195	O15027	SC16A_HUMAN	Protein transport protein Sec16A (SEC16 homolog A)	SEC16A
O15027	O15027_S1190	0.499638	NA	O15027	SC16A_HUMAN	Protein transport protein Sec16A (SEC16 homolog A)	SEC16A
O15027	O15027_S1191	-0.186333	0.765142	O15027	SC16A_HUMAN	Protein transport protein Sec16A (SEC16 homolog A)	SEC16A
O15027	O15027_S1905	-1.78345	0.286744	O15027	SC16A_HUMAN	Protein transport protein Sec16A (SEC16 homolog A)	SEC16A
O15027	O15027_S390	-1.13431	0.138836	O15027	SC16A_HUMAN	Protein transport protein Sec16A (SEC16 homolog A)	SEC16A
O15027	O15027_S411,O15027_S414,O15027_T415	-3.64043	NA	O15027	SC16A_HUMAN	Protein transport protein Sec16A (SEC16 homolog A)	SEC16A
O15027	O15027_S891	-1.16395	0.10274	O15027	SC16A_HUMAN	Protein transport protein Sec16A (SEC16 homolog A)	SEC16A
O15027	O15027_T1778	-1.62063	NA	O15027	SC16A_HUMAN	Protein transport protein Sec16A (SEC16 homolog A)	SEC16A
O15027	O15027_T1876	-1.3224	NA	O15027	SC16A_HUMAN	Protein transport protein Sec16A (SEC16 homolog A)	SEC16A
O15037	O15037_S10	-1.00661	0.200666	O15037	KHNYN_HUMAN	Protein KHNYN (KH and NYN domain-containing protein)	KHNYN
O15042	O15042_S236	0.718163	NA	O15042	SR140_HUMAN	U2 snRNP-associated SURP motif-containing protein (140 kDa Ser/Arg-rich domain protein) (U2-associated protein SR140)	U2SURP
O15042	O15042_S811	-2.76296	NA	O15042	SR140_HUMAN	U2 snRNP-associated SURP motif-containing protein (140 kDa Ser/Arg-rich domain protein) (U2-associated protein SR140)	U2SURP
O15047	O15047_S468	NA	NA	O15047	SET1A_HUMAN	Histone-lysine N-methyltransferase SETD1A (EC 2.1.1.43) (Lysine N-methyltransferase 2F) (SET domain-containing protein 1A) (hSET1A) (Set1/Ash2 histone methyltransferase complex subunit SET1)	SETD1A
O15047	O15047_S468,O15047_S470	NA	NA	O15047	SET1A_HUMAN	Histone-lysine N-methyltransferase SETD1A (EC 2.1.1.43) (Lysine N-methyltransferase 2F) (SET domain-containing protein 1A) (hSET1A) (Set1/Ash2 histone methyltransferase complex subunit SET1)	SETD1A
O15047	O15047_S915	-0.321811	0.720418	O15047	SET1A_HUMAN	Histone-lysine N-methyltransferase SETD1A (EC 2.1.1.43) (Lysine N-methyltransferase 2F) (SET domain-containing protein 1A) (hSET1A) (Set1/Ash2 histone methyltransferase complex subunit SET1)	SETD1A
O15047	O15047_T458,O15047_S464	0.359407	NA	O15047	SET1A_HUMAN	Histone-lysine N-methyltransferase SETD1A (EC 2.1.1.43) (Lysine N-methyltransferase 2F) (SET domain-containing protein 1A) (hSET1A) (Set1/Ash2 histone methyltransferase complex subunit SET1)	SETD1A
O15047	O15047_T540,O15047_T562	-1.8063	0.230705	O15047	SET1A_HUMAN	Histone-lysine N-methyltransferase SETD1A (EC 2.1.1.43) (Lysine N-methyltransferase 2F) (SET domain-containing protein 1A) (hSET1A) (Set1/Ash2 histone methyltransferase complex subunit SET1)	SETD1A
O15056	O15056_S1124	0.237031	0.680366	O15056	SYNJ2_HUMAN	Synaptojanin-2 (EC 3.1.3.36) (Synaptic inositol 1,4,5-trisphosphate 5-phosphatase 2)	SYNJ2
O15085	O15085_S1155	-1.68987	NA	O15085	ARHGB_HUMAN	Rho guanine nucleotide exchange factor 11 (PDZ-RhoGEF)	ARHGEF11
O15085	O15085_S1295	-1.11629	0.243638	O15085	ARHGB_HUMAN	Rho guanine nucleotide exchange factor 11 (PDZ-RhoGEF)	ARHGEF11
O15085	O15085_S1457	-1.18907	NA	O15085	ARHGB_HUMAN	Rho guanine nucleotide exchange factor 11 (PDZ-RhoGEF)	ARHGEF11
O15085	O15085_S1457,O15085_S1458	0.646858	0.39808	O15085	ARHGB_HUMAN	Rho guanine nucleotide exchange factor 11 (PDZ-RhoGEF)	ARHGEF11
O15085	O15085_S245,O15085_S251	-2.72214	NA	O15085	ARHGB_HUMAN	Rho guanine nucleotide exchange factor 11 (PDZ-RhoGEF)	ARHGEF11
O15085	O15085_S556	-2.09109	NA	O15085	ARHGB_HUMAN	Rho guanine nucleotide exchange factor 11 (PDZ-RhoGEF)	ARHGEF11
O15131	O15131_S3	0.558512	NA	O15131	IMA5_HUMAN	Importin subunit alpha-6 (Karyopherin subunit alpha-5)	KPNA5
O15164	O15164_S1028	0.500886	NA	O15164	TIF1A_HUMAN	Transcription intermediary factor 1-alpha (TIF1-alpha) (EC 6.3.2.-) (E3 ubiquitin-protein ligase TRIM24) (RING finger protein 82) (Tripartite motif-containing protein 24)	TRIM24
O15164	O15164_S1042	1.11184	0.427636	O15164	TIF1A_HUMAN	Transcription intermediary factor 1-alpha (TIF1-alpha) (EC 6.3.2.-) (E3 ubiquitin-protein ligase TRIM24) (RING finger protein 82) (Tripartite motif-containing protein 24)	TRIM24
O15164	O15164_S744	-0.793844	0.363244	O15164	TIF1A_HUMAN	Transcription intermediary factor 1-alpha (TIF1-alpha) (EC 6.3.2.-) (E3 ubiquitin-protein ligase TRIM24) (RING finger protein 82) (Tripartite motif-containing protein 24)	TRIM24
O15164	O15164_S811	-0.469107	NA	O15164	TIF1A_HUMAN	Transcription intermediary factor 1-alpha (TIF1-alpha) (EC 6.3.2.-) (E3 ubiquitin-protein ligase TRIM24) (RING finger protein 82) (Tripartite motif-containing protein 24)	TRIM24
O15173	O15173_T211	-0.49895	0.605745	O15173	PGRC2_HUMAN	Membrane-associated progesterone receptor component 2 (Progesterone membrane-binding protein) (Steroid receptor protein DG6)	PGRMC2
O15211	O15211_S13	-1.65847	NA	O15211	RGL2_HUMAN	Ral guanine nucleotide dissociation stimulator-like 2 (RalGDS-like 2) (RalGDS-like factor) (Ras-associated protein RAB2L)	RGL2
O15211	O15211_S736	-1.32236	NA	O15211	RGL2_HUMAN	Ral guanine nucleotide dissociation stimulator-like 2 (RalGDS-like 2) (RalGDS-like factor) (Ras-associated protein RAB2L)	RGL2
O15226	O15226_S618	NA	NA	O15226	NKRF_HUMAN	NF-kappa-B-repressing factor (NFkB-repressing factor) (Protein ITBA4) (Transcription factor NRF)	NKRF
O15231	O15231_S453	-0.988119	NA	O15231	ZN185_HUMAN	Zinc finger protein 185 (LIM domain protein ZNF185) (P1-A)	ZNF185
O15231	O15231_S465	-0.567796	0.103412	O15231	ZN185_HUMAN	Zinc finger protein 185 (LIM domain protein ZNF185) (P1-A)	ZNF185
O15234	O15234_S140	NA	NA	O15234	CASC3_HUMAN	Protein CASC3 (Cancer susceptibility candidate gene 3 protein) (Metastatic lymph node gene 51 protein) (MLN 51) (Protein barentsz) (Btz)	CASC3
O15234	O15234_S148	0.644751	0.553969	O15234	CASC3_HUMAN	Protein CASC3 (Cancer susceptibility candidate gene 3 protein) (Metastatic lymph node gene 51 protein) (MLN 51) (Protein barentsz) (Btz)	CASC3
O15234	O15234_S265	-0.121401	0.705596	O15234	CASC3_HUMAN	Protein CASC3 (Cancer susceptibility candidate gene 3 protein) (Metastatic lymph node gene 51 protein) (MLN 51) (Protein barentsz) (Btz)	CASC3
O15234	O15234_S363	-1.28671	0.110895	O15234	CASC3_HUMAN	Protein CASC3 (Cancer susceptibility candidate gene 3 protein) (Metastatic lymph node gene 51 protein) (MLN 51) (Protein barentsz) (Btz)	CASC3
O15234	O15234_S363,O15234_S373	NA	NA	O15234	CASC3_HUMAN	Protein CASC3 (Cancer susceptibility candidate gene 3 protein) (Metastatic lymph node gene 51 protein) (MLN 51) (Protein barentsz) (Btz)	CASC3
O15320	O15320_S536	-1.42683	0.210563	O15320	CTGE5_HUMAN	Cutaneous T-cell lymphoma-associated antigen 5 (Protein cTAGE-5) (Meningioma-expressed antigen 6/11) (cTAGE family member 5)	CTAGE5
O15320	O15320_S596	-2.22447	0.124824	O15320	CTGE5_HUMAN	Cutaneous T-cell lymphoma-associated antigen 5 (Protein cTAGE-5) (Meningioma-expressed antigen 6/11) (cTAGE family member 5)	CTAGE5
O15320	O15320_S635	-0.603366	0.351518	O15320	CTGE5_HUMAN	Cutaneous T-cell lymphoma-associated antigen 5 (Protein cTAGE-5) (Meningioma-expressed antigen 6/11) (cTAGE family member 5)	CTAGE5
O15320;Q8IX94;Q86UF2;P0CG41;A4FU28;A4D2H0	O15320_S139,Q8IX94_S140,Q86UF2_S140,P0CG41_S140,A4FU28_S140,A4D2H0_S140	-1.329	NA	A4FU28;O15320;P0CG41;Q86UF2;Q8IX94	CTGE9_HUMAN;CTGE5_HUMAN;CTGE8_HUMAN;CTGE6_HUMAN;CTGE4_HUMAN	Cutaneous T-cell lymphoma-associated antigen 9 (Protein cTAGE-9);Cutaneous T-cell lymphoma-associated antigen 5 (Protein cTAGE-5) (Meningioma-expressed antigen 6/11) (cTAGE family member 5);Cutaneous T-cell lymphoma-associated antigen 8 (Protein cTAGE-8);Putative protein cTAGE-6 (cTAGE family member 6);Cutaneous T-cell lymphoma-associated antigen 4 (Protein cTAGE-4)	CTAGE9;CTAGE5;CTAGE8;CTAGE6P;CTAGE4
O15320;Q96RT6	O15320_S647,Q96RT6_S616	0.16251	NA	O15320;Q96RT6	CTGE5_HUMAN;CTGE2_HUMAN	Cutaneous T-cell lymphoma-associated antigen 5 (Protein cTAGE-5) (Meningioma-expressed antigen 6/11) (cTAGE family member 5);Protein cTAGE-2 (Cancer/testis antigen 21.2) (CT21.2)	CTAGE5;CTAGE1
O15355	O15355_S527	-1.06916	NA	O15355	PPM1G_HUMAN	Protein phosphatase 1G (EC 3.1.3.16) (Protein phosphatase 1C) (Protein phosphatase 2C isoform gamma) (PP2C-gamma) (Protein phosphatase magnesium-dependent 1 gamma)	PPM1G
O15357	O15357_S132	0.635356	0.725825	O15357	SHIP2_HUMAN	Phosphatidylinositol 3,4,5-trisphosphate 5-phosphatase 2 (EC 3.1.3.86) (Inositol polyphosphate phosphatase-like protein 1) (INPPL-1) (Protein 51C) (SH2 domain-containing inositol 5'-phosphatase 2) (SH2 domain-containing inositol phosphatase 2) (SHIP-2)	INPPL1
O15357	O15357_S149	NA	NA	O15357	SHIP2_HUMAN	Phosphatidylinositol 3,4,5-trisphosphate 5-phosphatase 2 (EC 3.1.3.86) (Inositol polyphosphate phosphatase-like protein 1) (INPPL-1) (Protein 51C) (SH2 domain-containing inositol 5'-phosphatase 2) (SH2 domain-containing inositol phosphatase 2) (SHIP-2)	INPPL1
O15357	O15357_S157	-2.23613	NA	O15357	SHIP2_HUMAN	Phosphatidylinositol 3,4,5-trisphosphate 5-phosphatase 2 (EC 3.1.3.86) (Inositol polyphosphate phosphatase-like protein 1) (INPPL-1) (Protein 51C) (SH2 domain-containing inositol 5'-phosphatase 2) (SH2 domain-containing inositol phosphatase 2) (SHIP-2)	INPPL1
O15357	O15357_S504	2.76227	NA	O15357	SHIP2_HUMAN	Phosphatidylinositol 3,4,5-trisphosphate 5-phosphatase 2 (EC 3.1.3.86) (Inositol polyphosphate phosphatase-like protein 1) (INPPL-1) (Protein 51C) (SH2 domain-containing inositol 5'-phosphatase 2) (SH2 domain-containing inositol phosphatase 2) (SHIP-2)	INPPL1
O15372	O15372_S183	-0.707592	0.278046	O15372	EIF3H_HUMAN	Eukaryotic translation initiation factor 3 subunit H (eIF3h) (Eukaryotic translation initiation factor 3 subunit 3) (eIF-3-gamma) (eIF3 p40 subunit)	EIF3H
O15400	O15400_S129	0.833686	0.156417	O15400	STX7_HUMAN	Syntaxin-7	STX7
O15417	O15417_S1857	-1.09277	0.512754	O15417	TNC18_HUMAN	Trinucleotide repeat-containing gene 18 protein (Long CAG trinucleotide repeat-containing gene 79 protein)	TNRC18
O15417	O15417_T2146	-1.00956	0.272771	O15417	TNC18_HUMAN	Trinucleotide repeat-containing gene 18 protein (Long CAG trinucleotide repeat-containing gene 79 protein)	TNRC18
O15417;Q9P281	O15417_T2470,Q9P281_T2216	1.4654	NA	O15417;Q9P281	TNC18_HUMAN;BAHC1_HUMAN	Trinucleotide repeat-containing gene 18 protein (Long CAG trinucleotide repeat-containing gene 79 protein);BAH and coiled-coil domain-containing protein 1 (Bromo adjacent homology domain-containing protein 2) (BAH domain-containing protein 2)	TNRC18;BAHCC1
O15446	O15446_S124	-0.809807	NA	O15446	RPA34_HUMAN	DNA-directed RNA polymerase I subunit RPA34 (A34.5) (Antisense to ERCC-1 protein) (ASE-1) (CD3-epsilon-associated protein) (CAST) (CD3E-associated protein) (RNA polymerase I-associated factor PAF49)	CD3EAP
O15446	O15446_S128	-3.0783	NA	O15446	RPA34_HUMAN	DNA-directed RNA polymerase I subunit RPA34 (A34.5) (Antisense to ERCC-1 protein) (ASE-1) (CD3-epsilon-associated protein) (CAST) (CD3E-associated protein) (RNA polymerase I-associated factor PAF49)	CD3EAP
O15446	O15446_S285	-0.814075	0.622148	O15446	RPA34_HUMAN	DNA-directed RNA polymerase I subunit RPA34 (A34.5) (Antisense to ERCC-1 protein) (ASE-1) (CD3-epsilon-associated protein) (CAST) (CD3E-associated protein) (RNA polymerase I-associated factor PAF49)	CD3EAP
O15541	O15541_S253	NA	NA	O15541	R113A_HUMAN	RING finger protein 113A (Zinc finger protein 183)	RNF113A
O15541	O15541_S6	-1.55376	0.394067	O15541	R113A_HUMAN	RING finger protein 113A (Zinc finger protein 183)	RNF113A
O43149	O43149_S2443	NA	NA	O43149	ZZEF1_HUMAN	Zinc finger ZZ-type and EF-hand domain-containing protein 1	ZZEF1
O43149	O43149_S2444	NA	NA	O43149	ZZEF1_HUMAN	Zinc finger ZZ-type and EF-hand domain-containing protein 1	ZZEF1
O43149	O43149_T1462	-0.431275	0.591012	O43149	ZZEF1_HUMAN	Zinc finger ZZ-type and EF-hand domain-containing protein 1	ZZEF1
O43159	O43159_S104	NA	NA	O43159	RRP8_HUMAN	Ribosomal RNA-processing protein 8 (EC 2.1.1.-) (Cerebral protein 1) (Nucleomethylin)	RRP8
O43159	O43159_S106	-0.0449651	NA	O43159	RRP8_HUMAN	Ribosomal RNA-processing protein 8 (EC 2.1.1.-) (Cerebral protein 1) (Nucleomethylin)	RRP8
O43159	O43159_S223	-0.106683	NA	O43159	RRP8_HUMAN	Ribosomal RNA-processing protein 8 (EC 2.1.1.-) (Cerebral protein 1) (Nucleomethylin)	RRP8
O43164	O43164_S253	0.572128	0.247444	O43164	PJA2_HUMAN	E3 ubiquitin-protein ligase Praja-2 (Praja2) (EC 6.3.2.-) (RING finger protein 131)	PJA2
O43164	O43164_S308	0.793396	NA	O43164	PJA2_HUMAN	E3 ubiquitin-protein ligase Praja-2 (Praja2) (EC 6.3.2.-) (RING finger protein 131)	PJA2
O43164	O43164_S309	0.87432	NA	O43164	PJA2_HUMAN	E3 ubiquitin-protein ligase Praja-2 (Praja2) (EC 6.3.2.-) (RING finger protein 131)	PJA2
O43166	O43166_S1116	0.43938	0.521314	O43166	SI1L1_HUMAN	Signal-induced proliferation-associated 1-like protein 1 (SIPA1-like protein 1) (High-risk human papilloma viruses E6 oncoproteins targeted protein 1) (E6-targeted protein 1)	SIPA1L1
O43166	O43166_S1127	-0.826563	NA	O43166	SI1L1_HUMAN	Signal-induced proliferation-associated 1-like protein 1 (SIPA1-like protein 1) (High-risk human papilloma viruses E6 oncoproteins targeted protein 1) (E6-targeted protein 1)	SIPA1L1
O43166	O43166_S1181	-0.423482	0.349355	O43166	SI1L1_HUMAN	Signal-induced proliferation-associated 1-like protein 1 (SIPA1-like protein 1) (High-risk human papilloma viruses E6 oncoproteins targeted protein 1) (E6-targeted protein 1)	SIPA1L1
O43166	O43166_S1349	NA	NA	O43166	SI1L1_HUMAN	Signal-induced proliferation-associated 1-like protein 1 (SIPA1-like protein 1) (High-risk human papilloma viruses E6 oncoproteins targeted protein 1) (E6-targeted protein 1)	SIPA1L1
O43166	O43166_S1433	2.13354	NA	O43166	SI1L1_HUMAN	Signal-induced proliferation-associated 1-like protein 1 (SIPA1-like protein 1) (High-risk human papilloma viruses E6 oncoproteins targeted protein 1) (E6-targeted protein 1)	SIPA1L1
O43166	O43166_S1439	NA	NA	O43166	SI1L1_HUMAN	Signal-induced proliferation-associated 1-like protein 1 (SIPA1-like protein 1) (High-risk human papilloma viruses E6 oncoproteins targeted protein 1) (E6-targeted protein 1)	SIPA1L1
O43166	O43166_S1442	NA	NA	O43166	SI1L1_HUMAN	Signal-induced proliferation-associated 1-like protein 1 (SIPA1-like protein 1) (High-risk human papilloma viruses E6 oncoproteins targeted protein 1) (E6-targeted protein 1)	SIPA1L1
O43166	O43166_S1528	0.170126	0.834846	O43166	SI1L1_HUMAN	Signal-induced proliferation-associated 1-like protein 1 (SIPA1-like protein 1) (High-risk human papilloma viruses E6 oncoproteins targeted protein 1) (E6-targeted protein 1)	SIPA1L1
O43166	O43166_S1549	-0.74118	NA	O43166	SI1L1_HUMAN	Signal-induced proliferation-associated 1-like protein 1 (SIPA1-like protein 1) (High-risk human papilloma viruses E6 oncoproteins targeted protein 1) (E6-targeted protein 1)	SIPA1L1
O43166	O43166_S1564	NA	NA	O43166	SI1L1_HUMAN	Signal-induced proliferation-associated 1-like protein 1 (SIPA1-like protein 1) (High-risk human papilloma viruses E6 oncoproteins targeted protein 1) (E6-targeted protein 1)	SIPA1L1
O43166	O43166_S1585	0.188348	0.131414	O43166	SI1L1_HUMAN	Signal-induced proliferation-associated 1-like protein 1 (SIPA1-like protein 1) (High-risk human papilloma viruses E6 oncoproteins targeted protein 1) (E6-targeted protein 1)	SIPA1L1
O43166	O43166_S1649	-0.404703	NA	O43166	SI1L1_HUMAN	Signal-induced proliferation-associated 1-like protein 1 (SIPA1-like protein 1) (High-risk human papilloma viruses E6 oncoproteins targeted protein 1) (E6-targeted protein 1)	SIPA1L1
O43166	O43166_S208	NA	NA	O43166	SI1L1_HUMAN	Signal-induced proliferation-associated 1-like protein 1 (SIPA1-like protein 1) (High-risk human papilloma viruses E6 oncoproteins targeted protein 1) (E6-targeted protein 1)	SIPA1L1
O43166	O43166_S288	-0.891529	0.0364357	O43166	SI1L1_HUMAN	Signal-induced proliferation-associated 1-like protein 1 (SIPA1-like protein 1) (High-risk human papilloma viruses E6 oncoproteins targeted protein 1) (E6-targeted protein 1)	SIPA1L1
O43166	O43166_S93	1.99884	NA	O43166	SI1L1_HUMAN	Signal-induced proliferation-associated 1-like protein 1 (SIPA1-like protein 1) (High-risk human papilloma viruses E6 oncoproteins targeted protein 1) (E6-targeted protein 1)	SIPA1L1
O43237	O43237_S194	NA	NA	O43237	DC1L2_HUMAN	Cytoplasmic dynein 1 light intermediate chain 2 (Dynein light intermediate chain 2, cytosolic) (LIC-2) (LIC53/55)	DYNC1LI2
O43237	O43237_S405	0.896265	NA	O43237	DC1L2_HUMAN	Cytoplasmic dynein 1 light intermediate chain 2 (Dynein light intermediate chain 2, cytosolic) (LIC-2) (LIC53/55)	DYNC1LI2
O43237	O43237_S443,O43237_S446	2.85075	NA	O43237	DC1L2_HUMAN	Cytoplasmic dynein 1 light intermediate chain 2 (Dynein light intermediate chain 2, cytosolic) (LIC-2) (LIC53/55)	DYNC1LI2
O43237	O43237_S446	2.24272	NA	O43237	DC1L2_HUMAN	Cytoplasmic dynein 1 light intermediate chain 2 (Dynein light intermediate chain 2, cytosolic) (LIC-2) (LIC53/55)	DYNC1LI2
O43242	O43242_S47	0.681174	NA	O43242	PSMD3_HUMAN	26S proteasome non-ATPase regulatory subunit 3 (26S proteasome regulatory subunit RPN3) (26S proteasome regulatory subunit S3) (Proteasome subunit p58)	PSMD3
O43264	O43264_S12	NA	NA	O43264	ZW10_HUMAN	Centromere/kinetochore protein zw10 homolog	ZW10
O43290	O43290_S448	-1.20954	0.131587	O43290	SNUT1_HUMAN	U4/U6.U5 tri-snRNP-associated protein 1 (SNU66 homolog) (hSnu66) (Squamous cell carcinoma antigen recognized by T-cells 1) (SART-1) (hSART-1) (U4/U6.U5 tri-snRNP-associated 110 kDa protein) (allergen Hom s 1)	SART1
O43290	O43290_S596	-3.76318	NA	O43290	SNUT1_HUMAN	U4/U6.U5 tri-snRNP-associated protein 1 (SNU66 homolog) (hSnu66) (Squamous cell carcinoma antigen recognized by T-cells 1) (SART-1) (hSART-1) (U4/U6.U5 tri-snRNP-associated 110 kDa protein) (allergen Hom s 1)	SART1
O43294	O43294_S137	-0.226386	NA	O43294	TGFI1_HUMAN	Transforming growth factor beta-1-induced transcript 1 protein (Androgen receptor coactivator 55 kDa protein) (Androgen receptor-associated protein of 55 kDa) (Hydrogen peroxide-inducible clone 5 protein) (Hic-5)	TGFB1I1
O43294	O43294_S137,O43294_S141	-1.28024	0.039721	O43294	TGFI1_HUMAN	Transforming growth factor beta-1-induced transcript 1 protein (Androgen receptor coactivator 55 kDa protein) (Androgen receptor-associated protein of 55 kDa) (Hydrogen peroxide-inducible clone 5 protein) (Hic-5)	TGFB1I1
O43294	O43294_S140,O43294_S141	0.111676	NA	O43294	TGFI1_HUMAN	Transforming growth factor beta-1-induced transcript 1 protein (Androgen receptor coactivator 55 kDa protein) (Androgen receptor-associated protein of 55 kDa) (Hydrogen peroxide-inducible clone 5 protein) (Hic-5)	TGFB1I1
O43294	O43294_S403	-0.169637	0.827904	O43294	TGFI1_HUMAN	Transforming growth factor beta-1-induced transcript 1 protein (Androgen receptor coactivator 55 kDa protein) (Androgen receptor-associated protein of 55 kDa) (Hydrogen peroxide-inducible clone 5 protein) (Hic-5)	TGFB1I1
O43294	O43294_S68	-0.461102	NA	O43294	TGFI1_HUMAN	Transforming growth factor beta-1-induced transcript 1 protein (Androgen receptor coactivator 55 kDa protein) (Androgen receptor-associated protein of 55 kDa) (Hydrogen peroxide-inducible clone 5 protein) (Hic-5)	TGFB1I1
O43303	O43303_S380	0.79746	NA	O43303	CP110_HUMAN	Centriolar coiled-coil protein of 110 kDa (Centrosomal protein of 110 kDa) (CP110) (Cep110)	CCP110
O43303	O43303_S400	-0.199755	NA	O43303	CP110_HUMAN	Centriolar coiled-coil protein of 110 kDa (Centrosomal protein of 110 kDa) (CP110) (Cep110)	CCP110
O43303	O43303_S641	-1.58424	NA	O43303	CP110_HUMAN	Centriolar coiled-coil protein of 110 kDa (Centrosomal protein of 110 kDa) (CP110) (Cep110)	CCP110
O43310	O43310_S299	-1.2657	0.365152	O43310	CTIF_HUMAN	CBP80/20-dependent translation initiation factor	CTIF
O43318	O43318_S367	-0.443976	NA	O43318	M3K7_HUMAN	Mitogen-activated protein kinase kinase kinase 7 (EC 2.7.11.25) (Transforming growth factor-beta-activated kinase 1) (TGF-beta-activated kinase 1)	MAP3K7
O43318	O43318_S389	-0.461122	0.624262	O43318	M3K7_HUMAN	Mitogen-activated protein kinase kinase kinase 7 (EC 2.7.11.25) (Transforming growth factor-beta-activated kinase 1) (TGF-beta-activated kinase 1)	MAP3K7
O43318	O43318_S439	-1.09369	0.470723	O43318	M3K7_HUMAN	Mitogen-activated protein kinase kinase kinase 7 (EC 2.7.11.25) (Transforming growth factor-beta-activated kinase 1) (TGF-beta-activated kinase 1)	MAP3K7
O43318	O43318_T415	-0.171479	0.907232	O43318	M3K7_HUMAN	Mitogen-activated protein kinase kinase kinase 7 (EC 2.7.11.25) (Transforming growth factor-beta-activated kinase 1) (TGF-beta-activated kinase 1)	MAP3K7
O43353	O43353_S363	-1.52544	NA	O43353	RIPK2_HUMAN	Receptor-interacting serine/threonine-protein kinase 2 (EC 2.7.11.1) (CARD-containing interleukin-1 beta-converting enzyme-associated kinase) (CARD-containing IL-1 beta ICE-kinase) (RIP-like-interacting CLARP kinase) (Receptor-interacting protein 2) (RIP-2) (Tyrosine-protein kinase RIPK2) (EC 2.7.10.2)	RIPK2
O43353	O43353_S393	-0.402943	0.147232	O43353	RIPK2_HUMAN	Receptor-interacting serine/threonine-protein kinase 2 (EC 2.7.11.1) (CARD-containing interleukin-1 beta-converting enzyme-associated kinase) (CARD-containing IL-1 beta ICE-kinase) (RIP-like-interacting CLARP kinase) (Receptor-interacting protein 2) (RIP-2) (Tyrosine-protein kinase RIPK2) (EC 2.7.10.2)	RIPK2
O43353	O43353_S531	-2.10735	0.237096	O43353	RIPK2_HUMAN	Receptor-interacting serine/threonine-protein kinase 2 (EC 2.7.11.1) (CARD-containing interleukin-1 beta-converting enzyme-associated kinase) (CARD-containing IL-1 beta ICE-kinase) (RIP-like-interacting CLARP kinase) (Receptor-interacting protein 2) (RIP-2) (Tyrosine-protein kinase RIPK2) (EC 2.7.10.2)	RIPK2
O43379	O43379_S1070	-0.734239	0.371388	O43379	WDR62_HUMAN	WD repeat-containing protein 62	WDR62
O43379	O43379_S1144	NA	NA	O43379	WDR62_HUMAN	WD repeat-containing protein 62	WDR62
O43379	O43379_S1226	-0.873929	NA	O43379	WDR62_HUMAN	WD repeat-containing protein 62	WDR62
O43379	O43379_S1228	-1.93635	NA	O43379	WDR62_HUMAN	WD repeat-containing protein 62	WDR62
O43379	O43379_S1249	NA	NA	O43379	WDR62_HUMAN	WD repeat-containing protein 62	WDR62
O43379	O43379_S32	0.598515	NA	O43379	WDR62_HUMAN	WD repeat-containing protein 62	WDR62
O43395	O43395_S619	0.307716	NA	O43395	PRPF3_HUMAN	U4/U6 small nuclear ribonucleoprotein Prp3 (Pre-mRNA-splicing factor 3) (hPrp3) (U4/U6 snRNP 90 kDa protein)	PRPF3
O43399	O43399_S12	-0.783351	0.816	O43399	TPD54_HUMAN	Tumor protein D54 (hD54) (Tumor protein D52-like 2)	TPD52L2
O43399	O43399_S149	-0.531372	NA	O43399	TPD54_HUMAN	Tumor protein D54 (hD54) (Tumor protein D52-like 2)	TPD52L2
O43399	O43399_S161	0.0698474	0.62043	O43399	TPD54_HUMAN	Tumor protein D54 (hD54) (Tumor protein D52-like 2)	TPD52L2
O43399	O43399_S166	-0.330259	0.720463	O43399	TPD54_HUMAN	Tumor protein D54 (hD54) (Tumor protein D52-like 2)	TPD52L2
O43399	O43399_S96	-0.451855	0.688488	O43399	TPD54_HUMAN	Tumor protein D54 (hD54) (Tumor protein D52-like 2)	TPD52L2
O43399	O43399_T163	-0.404551	0.132641	O43399	TPD54_HUMAN	Tumor protein D54 (hD54) (Tumor protein D52-like 2)	TPD52L2
O43426	O43426_S1565	-0.095989	NA	O43426	SYNJ1_HUMAN	Synaptojanin-1 (EC 3.1.3.36) (Synaptic inositol 1,4,5-trisphosphate 5-phosphatase 1)	SYNJ1
O43426	O43426_T1220	1.42675	0.27188	O43426	SYNJ1_HUMAN	Synaptojanin-1 (EC 3.1.3.36) (Synaptic inositol 1,4,5-trisphosphate 5-phosphatase 1)	SYNJ1
O43432	O43432_S1131	1.31793	0.0028856	O43432	IF4G3_HUMAN	Eukaryotic translation initiation factor 4 gamma 3 (eIF-4-gamma 3) (eIF-4G 3) (eIF4G 3) (eIF-4-gamma II) (eIF4GII)	EIF4G3
O43432	O43432_S1156	0.860999	NA	O43432	IF4G3_HUMAN	Eukaryotic translation initiation factor 4 gamma 3 (eIF-4-gamma 3) (eIF-4G 3) (eIF4G 3) (eIF-4-gamma II) (eIF4GII)	EIF4G3
O43432	O43432_S1157	0.222366	NA	O43432	IF4G3_HUMAN	Eukaryotic translation initiation factor 4 gamma 3 (eIF-4-gamma 3) (eIF-4G 3) (eIF4G 3) (eIF-4-gamma II) (eIF4GII)	EIF4G3
O43432	O43432_S232	-1.29909	0.0257086	O43432	IF4G3_HUMAN	Eukaryotic translation initiation factor 4 gamma 3 (eIF-4-gamma 3) (eIF-4G 3) (eIF4G 3) (eIF-4-gamma II) (eIF4GII)	EIF4G3
O43432	O43432_S305	1.50839	NA	O43432	IF4G3_HUMAN	Eukaryotic translation initiation factor 4 gamma 3 (eIF-4-gamma 3) (eIF-4G 3) (eIF4G 3) (eIF-4-gamma II) (eIF4GII)	EIF4G3
O43432	O43432_S495	-0.783292	0.600296	O43432	IF4G3_HUMAN	Eukaryotic translation initiation factor 4 gamma 3 (eIF-4-gamma 3) (eIF-4G 3) (eIF4G 3) (eIF-4-gamma II) (eIF4GII)	EIF4G3
O43435	O43435_S327	0.450882	0.276973	O43435	TBX1_HUMAN	T-box transcription factor TBX1 (T-box protein 1) (Testis-specific T-box protein)	TBX1
O43439	O43439_S264	NA	NA	O43439	MTG8R_HUMAN	Protein CBFA2T2 (ETO homologous on chromosome 20) (MTG8-like protein) (MTG8-related protein 1) (Myeloid translocation-related protein 1) (p85)	CBFA2T2
O43439	O43439_S409	0.642668	NA	O43439	MTG8R_HUMAN	Protein CBFA2T2 (ETO homologous on chromosome 20) (MTG8-like protein) (MTG8-related protein 1) (Myeloid translocation-related protein 1) (p85)	CBFA2T2
O43491	O43491_S38	-1.03377	NA	O43491	E41L2_HUMAN	Band 4.1-like protein 2 (Generally expressed protein 4.1) (4.1G)	EPB41L2
O43491	O43491_S39	1.03388	0.484289	O43491	E41L2_HUMAN	Band 4.1-like protein 2 (Generally expressed protein 4.1) (4.1G)	EPB41L2
O43491	O43491_S682	0.534795	NA	O43491	E41L2_HUMAN	Band 4.1-like protein 2 (Generally expressed protein 4.1) (4.1G)	EPB41L2
O43491	O43491_S58	-1.29304	NA	O43491	E41L2_HUMAN	Band 4.1-like protein 2 (Generally expressed protein 4.1) (4.1G)	EPB41L2
O43491	O43491_S598	-1.4159	0.295963	O43491	E41L2_HUMAN	Band 4.1-like protein 2 (Generally expressed protein 4.1) (4.1G)	EPB41L2
O43491	O43491_S676	0.0586778	NA	O43491	E41L2_HUMAN	Band 4.1-like protein 2 (Generally expressed protein 4.1) (4.1G)	EPB41L2
O43491	O43491_T600	-3.26987	NA	O43491	E41L2_HUMAN	Band 4.1-like protein 2 (Generally expressed protein 4.1) (4.1G)	EPB41L2
O43491	O43491_S715	-0.521127	0.239472	O43491	E41L2_HUMAN	Band 4.1-like protein 2 (Generally expressed protein 4.1) (4.1G)	EPB41L2
O43491	O43491_S798	NA	NA	O43491	E41L2_HUMAN	Band 4.1-like protein 2 (Generally expressed protein 4.1) (4.1G)	EPB41L2
O43491	O43491_S87	0.433284	NA	O43491	E41L2_HUMAN	Band 4.1-like protein 2 (Generally expressed protein 4.1) (4.1G)	EPB41L2
O43491	O43491_T89	-0.650676	NA	O43491	E41L2_HUMAN	Band 4.1-like protein 2 (Generally expressed protein 4.1) (4.1G)	EPB41L2
O43491;Q9Y2J2;Q9H4G0;P11171	O43491_S518,Q9Y2J2_S409,Q9H4G0_S396,P11171_S510	-0.696934	NA	O43491;P11171;Q9H4G0;Q9Y2J2	E41L2_HUMAN;41_HUMAN;E41L1_HUMAN;E41L3_HUMAN	Band 4.1-like protein 2 (Generally expressed protein 4.1) (4.1G);Protein 4.1 (P4.1) (4.1R) (Band 4.1) (EPB4.1);Band 4.1-like protein 1 (Neuronal protein 4.1) (4.1N);Band 4.1-like protein 3 (4.1B) (Differentially expressed in adenocarcinoma of the lung protein 1) (DAL-1)	EPB41L2;EPB41;EPB41L1;EPB41L3
O43493	O43493_S298	0.872524	0.761005	O43493	TGON2_HUMAN	Trans-Golgi network integral membrane protein 2 (TGN38 homolog) (TGN46) (TGN48) (Trans-Golgi network protein TGN51)	TGOLN2
O43493	O43493_S314	-0.671556	NA	O43493	TGON2_HUMAN	Trans-Golgi network integral membrane protein 2 (TGN38 homolog) (TGN46) (TGN48) (Trans-Golgi network protein TGN51)	TGOLN2
O43493	O43493_S71	0.397896	0.554394	O43493	TGON2_HUMAN	Trans-Golgi network integral membrane protein 2 (TGN38 homolog) (TGN46) (TGN48) (Trans-Golgi network protein TGN51)	TGOLN2
O43493	O43493_T296	-2.2472	0.30962	O43493	TGON2_HUMAN	Trans-Golgi network integral membrane protein 2 (TGN38 homolog) (TGN46) (TGN48) (Trans-Golgi network protein TGN51)	TGOLN2
O43521	O43521_S77	-1.7733	0.354074	O43521	B2L11_HUMAN	Bcl-2-like protein 11 (Bcl2-L-11) (Bcl2-interacting mediator of cell death)	BCL2L11
O43521	O43521_S87	-0.434267	NA	O43521	B2L11_HUMAN	Bcl-2-like protein 11 (Bcl2-L-11) (Bcl2-interacting mediator of cell death)	BCL2L11
O43524	O43524_S12	-1.73985	0.478368	O43524	FOXO3_HUMAN	Forkhead box protein O3 (AF6q21 protein) (Forkhead in rhabdomyosarcoma-like 1)	FOXO3
O43524	O43524_S425	-1.38452	0.165308	O43524	FOXO3_HUMAN	Forkhead box protein O3 (AF6q21 protein) (Forkhead in rhabdomyosarcoma-like 1)	FOXO3
O43583	O43583_S73	-2.60671	NA	O43583	DENR_HUMAN	Density-regulated protein (DRP) (Protein DRP1) (Smooth muscle cell-associated protein 3) (SMAP-3)	DENR
O43598	O43598_T173	NA	NA	O43598	DNPH1_HUMAN	2'-deoxynucleoside 5'-phosphate N-hydrolase 1 (EC 3.2.2.-) (c-Myc-responsive protein Rcl)	DNPH1
O43683	O43683_S596	0.509612	NA	O43683	BUB1_HUMAN	Mitotic checkpoint serine/threonine-protein kinase BUB1 (hBUB1) (EC 2.7.11.1) (BUB1A)	BUB1
O43683	O43683_S655	NA	NA	O43683	BUB1_HUMAN	Mitotic checkpoint serine/threonine-protein kinase BUB1 (hBUB1) (EC 2.7.11.1) (BUB1A)	BUB1
O43719	O43719_S387	0.389877	0.797666	O43719	HTSF1_HUMAN	HIV Tat-specific factor 1 (Tat-SF1)	HTATSF1
O43719	O43719_S452	-2.32077	0.0341131	O43719	HTSF1_HUMAN	HIV Tat-specific factor 1 (Tat-SF1)	HTATSF1
O43719	O43719_S452,O43719_S453	1.03319	NA	O43719	HTSF1_HUMAN	HIV Tat-specific factor 1 (Tat-SF1)	HTATSF1
O43719	O43719_S453	-0.119465	NA	O43719	HTSF1_HUMAN	HIV Tat-specific factor 1 (Tat-SF1)	HTATSF1
O43719	O43719_S481	-0.00945147	NA	O43719	HTSF1_HUMAN	HIV Tat-specific factor 1 (Tat-SF1)	HTATSF1
O43719	O43719_S494	-0.0938294	0.944373	O43719	HTSF1_HUMAN	HIV Tat-specific factor 1 (Tat-SF1)	HTATSF1
O43719	O43719_S494,O43719_S498	0.333554	0.704151	O43719	HTSF1_HUMAN	HIV Tat-specific factor 1 (Tat-SF1)	HTATSF1
O43719	O43719_S498	0.983478	0.513638	O43719	HTSF1_HUMAN	HIV Tat-specific factor 1 (Tat-SF1)	HTATSF1
O43719	O43719_S529	-0.329155	0.51396	O43719	HTSF1_HUMAN	HIV Tat-specific factor 1 (Tat-SF1)	HTATSF1
O43719	O43719_S579	0.287612	NA	O43719	HTSF1_HUMAN	HIV Tat-specific factor 1 (Tat-SF1)	HTATSF1
O43719	O43719_S616	-0.538385	0.367566	O43719	HTSF1_HUMAN	HIV Tat-specific factor 1 (Tat-SF1)	HTATSF1
O43719	O43719_S642	-0.821412	0.420384	O43719	HTSF1_HUMAN	HIV Tat-specific factor 1 (Tat-SF1)	HTATSF1
O43719	O43719_S676	-1.17018	0.498839	O43719	HTSF1_HUMAN	HIV Tat-specific factor 1 (Tat-SF1)	HTATSF1
O43719	O43719_S702	-1.99136	0.170422	O43719	HTSF1_HUMAN	HIV Tat-specific factor 1 (Tat-SF1)	HTATSF1
O43719	O43719_S713	NA	NA	O43719	HTSF1_HUMAN	HIV Tat-specific factor 1 (Tat-SF1)	HTATSF1
O43752	O43752_S2	NA	NA	O43752	STX6_HUMAN	Syntaxin-6	STX6
O43765	O43765_S301,O43765_S305	1.11755	NA	O43765	SGTA_HUMAN	Small glutamine-rich tetratricopeptide repeat-containing protein alpha (Alpha-SGT) (Vpu-binding protein) (UBP)	SGTA
O43765	O43765_S305	1.39307	0.362247	O43765	SGTA_HUMAN	Small glutamine-rich tetratricopeptide repeat-containing protein alpha (Alpha-SGT) (Vpu-binding protein) (UBP)	SGTA
O43765	O43765_S77	-0.418281	0.506226	O43765	SGTA_HUMAN	Small glutamine-rich tetratricopeptide repeat-containing protein alpha (Alpha-SGT) (Vpu-binding protein) (UBP)	SGTA
O43765	O43765_S77,O43765_T81	0.627709	0.481679	O43765	SGTA_HUMAN	Small glutamine-rich tetratricopeptide repeat-containing protein alpha (Alpha-SGT) (Vpu-binding protein) (UBP)	SGTA
O43765	O43765_T303,O43765_S305	0.869668	NA	O43765	SGTA_HUMAN	Small glutamine-rich tetratricopeptide repeat-containing protein alpha (Alpha-SGT) (Vpu-binding protein) (UBP)	SGTA
O43765	O43765_T81	-0.0402065	0.952553	O43765	SGTA_HUMAN	Small glutamine-rich tetratricopeptide repeat-containing protein alpha (Alpha-SGT) (Vpu-binding protein) (UBP)	SGTA
O43768	O43768_S108	-0.0326651	0.942661	O43768	ENSA_HUMAN	Alpha-endosulfine (ARPP-19e)	ENSA
O43768	O43768_S109	0.431883	0.738117	O43768	ENSA_HUMAN	Alpha-endosulfine (ARPP-19e)	ENSA
O43768	O43768_S2	0.293106	0.714537	O43768	ENSA_HUMAN	Alpha-endosulfine (ARPP-19e)	ENSA
O43815	O43815_S245	NA	NA	O43815	STRN_HUMAN	Striatin	STRN
O43823	O43823_S323	0.662049	0.509618	O43823	AKAP8_HUMAN	A-kinase anchor protein 8 (AKAP-8) (A-kinase anchor protein 95 kDa) (AKAP 95)	AKAP8
O43823	O43823_S323,O43823_S328	-0.101167	NA	O43823	AKAP8_HUMAN	A-kinase anchor protein 8 (AKAP-8) (A-kinase anchor protein 95 kDa) (AKAP 95)	AKAP8
O43823	O43823_S328	-0.602062	0.0738522	O43823	AKAP8_HUMAN	A-kinase anchor protein 8 (AKAP-8) (A-kinase anchor protein 95 kDa) (AKAP 95)	AKAP8
O43823	O43823_S339	0.733027	0.309484	O43823	AKAP8_HUMAN	A-kinase anchor protein 8 (AKAP-8) (A-kinase anchor protein 95 kDa) (AKAP 95)	AKAP8
O43847	O43847_S86	0.343817	NA	O43847	NRDC_HUMAN	Nardilysin (EC 3.4.24.61) (N-arginine dibasic convertase) (NRD convertase) (NRD-C)	NRD1
O43847	O43847_S94	-0.120748	0.91104	O43847	NRDC_HUMAN	Nardilysin (EC 3.4.24.61) (N-arginine dibasic convertase) (NRD convertase) (NRD-C)	NRD1
O43852	O43852_S277	2.11939	NA	O43852	CALU_HUMAN	Calumenin (Crocalbin) (IEF SSP 9302)	CALU
O43852	O43852_S44	-2.36881	0.493251	O43852	CALU_HUMAN	Calumenin (Crocalbin) (IEF SSP 9302)	CALU
O43896	O43896_S1033	0.359447	0.849556	O43896	KIF1C_HUMAN	Kinesin-like protein KIF1C	KIF1C
O43896	O43896_S1092	1.14962	0.411741	O43896	KIF1C_HUMAN	Kinesin-like protein KIF1C	KIF1C
O43896	O43896_S674,O43896_S676	0.374984	0.665459	O43896	KIF1C_HUMAN	Kinesin-like protein KIF1C	KIF1C
O43896	O43896_S676	0.860754	NA	O43896	KIF1C_HUMAN	Kinesin-like protein KIF1C	KIF1C
O43896	O43896_S910	-0.184535	NA	O43896	KIF1C_HUMAN	Kinesin-like protein KIF1C	KIF1C
O43896	O43896_T1083	-1.51661	NA	O43896	KIF1C_HUMAN	Kinesin-like protein KIF1C	KIF1C
O43933	O43933_S1181	-0.683119	0.172006	O43933	PEX1_HUMAN	Peroxisome biogenesis factor 1 (Peroxin-1) (Peroxisome biogenesis disorder protein 1)	PEX1
O43933	O43933_T1179	-1.61946	NA	O43933	PEX1_HUMAN	Peroxisome biogenesis factor 1 (Peroxin-1) (Peroxisome biogenesis disorder protein 1)	PEX1
O60231	O60231_S103	-0.910193	NA	O60231	DHX16_HUMAN	Putative pre-mRNA-splicing factor ATP-dependent RNA helicase DHX16 (EC 3.6.4.13) (ATP-dependent RNA helicase #3) (DEAH-box protein 16)	DHX16
O60231	O60231_S103,O60231_S106	0.403019	0.77564	O60231	DHX16_HUMAN	Putative pre-mRNA-splicing factor ATP-dependent RNA helicase DHX16 (EC 3.6.4.13) (ATP-dependent RNA helicase #3) (DEAH-box protein 16)	DHX16
O60231	O60231_S103,O60231_S107	NA	NA	O60231	DHX16_HUMAN	Putative pre-mRNA-splicing factor ATP-dependent RNA helicase DHX16 (EC 3.6.4.13) (ATP-dependent RNA helicase #3) (DEAH-box protein 16)	DHX16
O60231	O60231_S106	-0.15674	0.900966	O60231	DHX16_HUMAN	Putative pre-mRNA-splicing factor ATP-dependent RNA helicase DHX16 (EC 3.6.4.13) (ATP-dependent RNA helicase #3) (DEAH-box protein 16)	DHX16
O60231	O60231_S160	-0.838836	0.235069	O60231	DHX16_HUMAN	Putative pre-mRNA-splicing factor ATP-dependent RNA helicase DHX16 (EC 3.6.4.13) (ATP-dependent RNA helicase #3) (DEAH-box protein 16)	DHX16
O60231	O60231_T155	0.510429	NA	O60231	DHX16_HUMAN	Putative pre-mRNA-splicing factor ATP-dependent RNA helicase DHX16 (EC 3.6.4.13) (ATP-dependent RNA helicase #3) (DEAH-box protein 16)	DHX16
O60238	O60238_S118	NA	NA	O60238	BNI3L_HUMAN	BCL2/adenovirus E1B 19 kDa protein-interacting protein 3-like (Adenovirus E1B19K-binding protein B5) (BCL2/adenovirus E1B 19 kDa protein-interacting protein 3A) (NIP3-like protein X) (NIP3L)	BNIP3L
O60238	O60238_S120	-0.359193	0.654769	O60238	BNI3L_HUMAN	BCL2/adenovirus E1B 19 kDa protein-interacting protein 3-like (Adenovirus E1B19K-binding protein B5) (BCL2/adenovirus E1B 19 kDa protein-interacting protein 3A) (NIP3-like protein X) (NIP3L)	BNIP3L
O60244	O60244_S617	0.730154	0.429583	O60244	MED14_HUMAN	Mediator of RNA polymerase II transcription subunit 14 (Activator-recruited cofactor 150 kDa component) (ARC150) (Cofactor required for Sp1 transcriptional activation subunit 2) (CRSP complex subunit 2) (Mediator complex subunit 14) (RGR1 homolog) (hRGR1) (Thyroid hormone receptor-associated protein complex 170 kDa component) (Trap170) (Transcriptional coactivator CRSP150) (Vitamin D3 receptor-in…	MED14
O60264	O60264_S66	NA	NA	O60264	SMCA5_HUMAN	SWI/SNF-related matrix-associated actin-dependent regulator of chromatin subfamily A member 5 (SWI/SNF-related matrix-associated actin-dependent regulator of chromatin A5) (EC 3.6.4.-) (Sucrose nonfermenting protein 2 homolog) (hSNF2H)	SMARCA5
O60271	O60271_S183	0.256571	0.259955	O60271	JIP4_HUMAN	C-Jun-amino-terminal kinase-interacting protein 4 (JIP-4) (JNK-interacting protein 4) (Cancer/testis antigen 89) (CT89) (Human lung cancer oncogene 6 protein) (HLC-6) (JNK-associated leucine-zipper protein) (JLP) (Mitogen-activated protein kinase 8-interacting protein 4) (Proliferation-inducing protein 6) (Protein highly expressed in testis) (PHET) (Sperm surface protein) (Sperm-associated antige…	SPAG9
O60271	O60271_S249	-0.74697	NA	O60271	JIP4_HUMAN	C-Jun-amino-terminal kinase-interacting protein 4 (JIP-4) (JNK-interacting protein 4) (Cancer/testis antigen 89) (CT89) (Human lung cancer oncogene 6 protein) (HLC-6) (JNK-associated leucine-zipper protein) (JLP) (Mitogen-activated protein kinase 8-interacting protein 4) (Proliferation-inducing protein 6) (Protein highly expressed in testis) (PHET) (Sperm surface protein) (Sperm-associated antige…	SPAG9
O60271	O60271_S251	-0.566895	0.372311	O60271	JIP4_HUMAN	C-Jun-amino-terminal kinase-interacting protein 4 (JIP-4) (JNK-interacting protein 4) (Cancer/testis antigen 89) (CT89) (Human lung cancer oncogene 6 protein) (HLC-6) (JNK-associated leucine-zipper protein) (JLP) (Mitogen-activated protein kinase 8-interacting protein 4) (Proliferation-inducing protein 6) (Protein highly expressed in testis) (PHET) (Sperm surface protein) (Sperm-associated antige…	SPAG9
O60271	O60271_S329	NA	NA	O60271	JIP4_HUMAN	C-Jun-amino-terminal kinase-interacting protein 4 (JIP-4) (JNK-interacting protein 4) (Cancer/testis antigen 89) (CT89) (Human lung cancer oncogene 6 protein) (HLC-6) (JNK-associated leucine-zipper protein) (JLP) (Mitogen-activated protein kinase 8-interacting protein 4) (Proliferation-inducing protein 6) (Protein highly expressed in testis) (PHET) (Sperm surface protein) (Sperm-associated antige…	SPAG9
O60271	O60271_S332	-0.387429	NA	O60271	JIP4_HUMAN	C-Jun-amino-terminal kinase-interacting protein 4 (JIP-4) (JNK-interacting protein 4) (Cancer/testis antigen 89) (CT89) (Human lung cancer oncogene 6 protein) (HLC-6) (JNK-associated leucine-zipper protein) (JLP) (Mitogen-activated protein kinase 8-interacting protein 4) (Proliferation-inducing protein 6) (Protein highly expressed in testis) (PHET) (Sperm surface protein) (Sperm-associated antige…	SPAG9
O60271	O60271_S364	1.43588	NA	O60271	JIP4_HUMAN	C-Jun-amino-terminal kinase-interacting protein 4 (JIP-4) (JNK-interacting protein 4) (Cancer/testis antigen 89) (CT89) (Human lung cancer oncogene 6 protein) (HLC-6) (JNK-associated leucine-zipper protein) (JLP) (Mitogen-activated protein kinase 8-interacting protein 4) (Proliferation-inducing protein 6) (Protein highly expressed in testis) (PHET) (Sperm surface protein) (Sperm-associated antige…	SPAG9
O60271	O60271_S593	-0.307428	0.802181	O60271	JIP4_HUMAN	C-Jun-amino-terminal kinase-interacting protein 4 (JIP-4) (JNK-interacting protein 4) (Cancer/testis antigen 89) (CT89) (Human lung cancer oncogene 6 protein) (HLC-6) (JNK-associated leucine-zipper protein) (JLP) (Mitogen-activated protein kinase 8-interacting protein 4) (Proliferation-inducing protein 6) (Protein highly expressed in testis) (PHET) (Sperm surface protein) (Sperm-associated antige…	SPAG9
O60271	O60271_S728	-0.688138	0.174907	O60271	JIP4_HUMAN	C-Jun-amino-terminal kinase-interacting protein 4 (JIP-4) (JNK-interacting protein 4) (Cancer/testis antigen 89) (CT89) (Human lung cancer oncogene 6 protein) (HLC-6) (JNK-associated leucine-zipper protein) (JLP) (Mitogen-activated protein kinase 8-interacting protein 4) (Proliferation-inducing protein 6) (Protein highly expressed in testis) (PHET) (Sperm surface protein) (Sperm-associated antige…	SPAG9
O60271	O60271_S730	-1.05463	0.475197	O60271	JIP4_HUMAN	C-Jun-amino-terminal kinase-interacting protein 4 (JIP-4) (JNK-interacting protein 4) (Cancer/testis antigen 89) (CT89) (Human lung cancer oncogene 6 protein) (HLC-6) (JNK-associated leucine-zipper protein) (JLP) (Mitogen-activated protein kinase 8-interacting protein 4) (Proliferation-inducing protein 6) (Protein highly expressed in testis) (PHET) (Sperm surface protein) (Sperm-associated antige…	SPAG9
O60271	O60271_S730,O60271_S733	-0.28116	0.899131	O60271	JIP4_HUMAN	C-Jun-amino-terminal kinase-interacting protein 4 (JIP-4) (JNK-interacting protein 4) (Cancer/testis antigen 89) (CT89) (Human lung cancer oncogene 6 protein) (HLC-6) (JNK-associated leucine-zipper protein) (JLP) (Mitogen-activated protein kinase 8-interacting protein 4) (Proliferation-inducing protein 6) (Protein highly expressed in testis) (PHET) (Sperm surface protein) (Sperm-associated antige…	SPAG9
O60271	O60271_S733	NA	NA	O60271	JIP4_HUMAN	C-Jun-amino-terminal kinase-interacting protein 4 (JIP-4) (JNK-interacting protein 4) (Cancer/testis antigen 89) (CT89) (Human lung cancer oncogene 6 protein) (HLC-6) (JNK-associated leucine-zipper protein) (JLP) (Mitogen-activated protein kinase 8-interacting protein 4) (Proliferation-inducing protein 6) (Protein highly expressed in testis) (PHET) (Sperm surface protein) (Sperm-associated antige…	SPAG9
O60271	O60271_T177	NA	NA	O60271	JIP4_HUMAN	C-Jun-amino-terminal kinase-interacting protein 4 (JIP-4) (JNK-interacting protein 4) (Cancer/testis antigen 89) (CT89) (Human lung cancer oncogene 6 protein) (HLC-6) (JNK-associated leucine-zipper protein) (JLP) (Mitogen-activated protein kinase 8-interacting protein 4) (Proliferation-inducing protein 6) (Protein highly expressed in testis) (PHET) (Sperm surface protein) (Sperm-associated antige…	SPAG9
O60271	O60271_T217	-1.74793	NA	O60271	JIP4_HUMAN	C-Jun-amino-terminal kinase-interacting protein 4 (JIP-4) (JNK-interacting protein 4) (Cancer/testis antigen 89) (CT89) (Human lung cancer oncogene 6 protein) (HLC-6) (JNK-associated leucine-zipper protein) (JLP) (Mitogen-activated protein kinase 8-interacting protein 4) (Proliferation-inducing protein 6) (Protein highly expressed in testis) (PHET) (Sperm surface protein) (Sperm-associated antige…	SPAG9
O60271	O60271_T365	-0.242774	0.819738	O60271	JIP4_HUMAN	C-Jun-amino-terminal kinase-interacting protein 4 (JIP-4) (JNK-interacting protein 4) (Cancer/testis antigen 89) (CT89) (Human lung cancer oncogene 6 protein) (HLC-6) (JNK-associated leucine-zipper protein) (JLP) (Mitogen-activated protein kinase 8-interacting protein 4) (Proliferation-inducing protein 6) (Protein highly expressed in testis) (PHET) (Sperm surface protein) (Sperm-associated antige…	SPAG9
O60291	O60291_S459	1.63712	NA	O60291	MGRN1_HUMAN	E3 ubiquitin-protein ligase MGRN1 (EC 6.3.2.-) (Mahogunin RING finger protein 1) (RING finger protein 156)	MGRN1
O60291	O60291_S524	-1.09434	0.473722	O60291	MGRN1_HUMAN	E3 ubiquitin-protein ligase MGRN1 (EC 6.3.2.-) (Mahogunin RING finger protein 1) (RING finger protein 156)	MGRN1
O60292	O60292_S1364	-0.164349	0.89284	O60292	SI1L3_HUMAN	Signal-induced proliferation-associated 1-like protein 3 (SIPA1-like protein 3) (SPA-1-like protein 3)	SIPA1L3
O60292	O60292_S146	-0.122079	0.862554	O60292	SI1L3_HUMAN	Signal-induced proliferation-associated 1-like protein 3 (SIPA1-like protein 3) (SPA-1-like protein 3)	SIPA1L3
O60292	O60292_S1534	0.498322	NA	O60292	SI1L3_HUMAN	Signal-induced proliferation-associated 1-like protein 3 (SIPA1-like protein 3) (SPA-1-like protein 3)	SIPA1L3
O60292	O60292_S1544	-0.0540506	0.833161	O60292	SI1L3_HUMAN	Signal-induced proliferation-associated 1-like protein 3 (SIPA1-like protein 3) (SPA-1-like protein 3)	SIPA1L3
O60292	O60292_S170	-0.439844	0.676768	O60292	SI1L3_HUMAN	Signal-induced proliferation-associated 1-like protein 3 (SIPA1-like protein 3) (SPA-1-like protein 3)	SIPA1L3
O60293	O60293_S1046	-5.8315	NA	O60293	ZC3H1_HUMAN	Zinc finger C3H1 domain-containing protein (Coiled-coil domain-containing protein 131) (Proline/serine-rich coiled-coil protein 2)	ZFC3H1
O60293	O60293_S11	1.63448	NA	O60293	ZC3H1_HUMAN	Zinc finger C3H1 domain-containing protein (Coiled-coil domain-containing protein 131) (Proline/serine-rich coiled-coil protein 2)	ZFC3H1
O60293	O60293_S352	-0.847727	0.258755	O60293	ZC3H1_HUMAN	Zinc finger C3H1 domain-containing protein (Coiled-coil domain-containing protein 131) (Proline/serine-rich coiled-coil protein 2)	ZFC3H1
O60293	O60293_S503	NA	NA	O60293	ZC3H1_HUMAN	Zinc finger C3H1 domain-containing protein (Coiled-coil domain-containing protein 131) (Proline/serine-rich coiled-coil protein 2)	ZFC3H1
O60318	O60318_S529	NA	NA	O60318	MCM3A_HUMAN	80 kDa MCM3-associated protein (Protein GANP)	MCM3AP
O60318	O60318_S556	-0.880278	NA	O60318	MCM3A_HUMAN	80 kDa MCM3-associated protein (Protein GANP)	MCM3AP
O60333	O60333_S1057	NA	NA	O60333	KIF1B_HUMAN	Kinesin-like protein KIF1B (Klp)	KIF1B
O60333	O60333_S1645	0.67701	0.573684	O60333	KIF1B_HUMAN	Kinesin-like protein KIF1B (Klp)	KIF1B
O60333	O60333_S1658	-0.690184	NA	O60333	KIF1B_HUMAN	Kinesin-like protein KIF1B (Klp)	KIF1B
O60341	O60341_S166	-1.15942	NA	O60341	KDM1A_HUMAN	Lysine-specific histone demethylase 1A (EC 1.-.-.-) (BRAF35-HDAC complex protein BHC110) (Flavin-containing amine oxidase domain-containing protein 2)	KDM1A
O60343	O60343_S566	NA	NA	O60343	TBCD4_HUMAN	TBC1 domain family member 4 (Akt substrate of 160 kDa) (AS160)	TBC1D4
O60343	O60343_S569	NA	NA	O60343	TBCD4_HUMAN	TBC1 domain family member 4 (Akt substrate of 160 kDa) (AS160)	TBC1D4
O60343	O60343_S570	NA	NA	O60343	TBCD4_HUMAN	TBC1 domain family member 4 (Akt substrate of 160 kDa) (AS160)	TBC1D4
O60343	O60343_S588	-1.98297	0.0993142	O60343	TBCD4_HUMAN	TBC1 domain family member 4 (Akt substrate of 160 kDa) (AS160)	TBC1D4
O60343	O60343_S588,O60343_S591	0.430043	0.593829	O60343	TBCD4_HUMAN	TBC1 domain family member 4 (Akt substrate of 160 kDa) (AS160)	TBC1D4
O60343	O60343_S591	-1.78632	NA	O60343	TBCD4_HUMAN	TBC1 domain family member 4 (Akt substrate of 160 kDa) (AS160)	TBC1D4
O60343	O60343_S666	-1.18024	0.313681	O60343	TBCD4_HUMAN	TBC1 domain family member 4 (Akt substrate of 160 kDa) (AS160)	TBC1D4
O60343	O60343_S751	-1.35125	NA	O60343	TBCD4_HUMAN	TBC1 domain family member 4 (Akt substrate of 160 kDa) (AS160)	TBC1D4
O60343	O60343_T568	-0.726257	NA	O60343	TBCD4_HUMAN	TBC1 domain family member 4 (Akt substrate of 160 kDa) (AS160)	TBC1D4
O60343	O60343_T749	-0.837414	NA	O60343	TBCD4_HUMAN	TBC1 domain family member 4 (Akt substrate of 160 kDa) (AS160)	TBC1D4
O60343	O60343_T749,O60343_S757	-0.938466	0.590422	O60343	TBCD4_HUMAN	TBC1 domain family member 4 (Akt substrate of 160 kDa) (AS160)	TBC1D4
O60353	O60353_S620	-1.27609	NA	O60353	FZD6_HUMAN	Frizzled-6 (Fz-6) (hFz6)	FZD6
O60353	O60353_S629	0.259738	NA	O60353	FZD6_HUMAN	Frizzled-6 (Fz-6) (hFz6)	FZD6
O60353	O60353_S653	2.67719	NA	O60353	FZD6_HUMAN	Frizzled-6 (Fz-6) (hFz6)	FZD6
O60353	O60353_S656	NA	NA	O60353	FZD6_HUMAN	Frizzled-6 (Fz-6) (hFz6)	FZD6
O60447	O60447_S805	0.932672	NA	O60447	EVI5_HUMAN	Ecotropic viral integration site 5 protein homolog (EVI-5) (Neuroblastoma stage 4S gene protein)	EVI5
O60488;O95573	O60488_T679,O95573_T688	-2.63631	0.0808999	O60488;O95573	ACSL4_HUMAN;ACSL3_HUMAN	Long-chain-fatty-acid--CoA ligase 4 (EC 6.2.1.3) (Long-chain acyl-CoA synthetase 4) (LACS 4);Long-chain-fatty-acid--CoA ligase 3 (EC 6.2.1.3) (Long-chain acyl-CoA synthetase 3) (LACS 3)	ACSL4;ACSL3
O60493	O60493_S72	0.635866	0.662279	O60493	SNX3_HUMAN	Sorting nexin-3 (Protein SDP3)	SNX3
O60493	O60493_T155	-0.568219	0.541402	O60493	SNX3_HUMAN	Sorting nexin-3 (Protein SDP3)	SNX3
O60504	O60504_S530	-1.1925	0.337652	O60504	VINEX_HUMAN	Vinexin (SH3-containing adapter molecule 1) (SCAM-1) (Sorbin and SH3 domain-containing protein 3)	SORBS3
O60504	O60504_S544	0.968662	NA	O60504	VINEX_HUMAN	Vinexin (SH3-containing adapter molecule 1) (SCAM-1) (Sorbin and SH3 domain-containing protein 3)	SORBS3
O60504	O60504_S605	-1.89379	NA	O60504	VINEX_HUMAN	Vinexin (SH3-containing adapter molecule 1) (SCAM-1) (Sorbin and SH3 domain-containing protein 3)	SORBS3
O60504	O60504_T529	0.159986	NA	O60504	VINEX_HUMAN	Vinexin (SH3-containing adapter molecule 1) (SCAM-1) (Sorbin and SH3 domain-containing protein 3)	SORBS3
O60508	O60508_S43	NA	NA	O60508	PRP17_HUMAN	Pre-mRNA-processing factor 17 (Cell division cycle 40 homolog) (EH-binding protein 3) (Ehb3) (PRP17 homolog) (hPRP17)	CDC40
O60524	O60524_S417	-1.07652	NA	O60524	NEMF_HUMAN	Nuclear export mediator factor NEMF (Antigen NY-CO-1) (Serologically defined colon cancer antigen 1)	NEMF
O60547	O60547_S10	-1.15866	NA	O60547	GMDS_HUMAN	GDP-mannose 4,6 dehydratase (EC 4.2.1.47) (GDP-D-mannose dehydratase) (GMD)	GMDS
O60548	O60548_S96	1.05919	NA	O60548	FOXD2_HUMAN	Forkhead box protein D2 (Forkhead-related protein FKHL17) (Forkhead-related transcription factor 9) (FREAC-9)	FOXD2
O60551	O60551_T64,O60551_S68	2.72146	0.202204	O60551	NMT2_HUMAN	Glycylpeptide N-tetradecanoyltransferase 2 (EC 2.3.1.97) (Myristoyl-CoA:protein N-myristoyltransferase 2) (NMT 2) (Peptide N-myristoyltransferase 2) (Type II N-myristoyltransferase)	NMT2
O60566	O60566_S670	NA	NA	O60566	BUB1B_HUMAN	Mitotic checkpoint serine/threonine-protein kinase BUB1 beta (EC 2.7.11.1) (MAD3/BUB1-related protein kinase) (hBUBR1) (Mitotic checkpoint kinase MAD3L) (Protein SSK1)	BUB1B
O60583	O60583_S601	-0.584199	0.184596	O60583	CCNT2_HUMAN	Cyclin-T2 (CycT2)	CCNT2
O60658	O60658_S457	NA	NA	O60658	PDE8A_HUMAN	High affinity cAMP-specific and IBMX-insensitive 3',5'-cyclic phosphodiesterase 8A (EC 3.1.4.17)	PDE8A
O60664	O60664_S130	-2.6076	0.198527	O60664	PLIN3_HUMAN	Perilipin-3 (47 kDa mannose 6-phosphate receptor-binding protein) (47 kDa MPR-binding protein) (Cargo selection protein TIP47) (Mannose-6-phosphate receptor-binding protein 1) (Placental protein 17) (PP17)	PLIN3
O60664	O60664_S196	1.16618	NA	O60664	PLIN3_HUMAN	Perilipin-3 (47 kDa mannose 6-phosphate receptor-binding protein) (47 kDa MPR-binding protein) (Cargo selection protein TIP47) (Mannose-6-phosphate receptor-binding protein 1) (Placental protein 17) (PP17)	PLIN3
O60716	O60716_S269	0.170424	NA	O60716	CTND1_HUMAN	Catenin delta-1 (Cadherin-associated Src substrate) (CAS) (p120 catenin) (p120(ctn)) (p120(cas))	CTNND1
O60716	O60716_S346,O60716_S349	NA	NA	O60716	CTND1_HUMAN	Catenin delta-1 (Cadherin-associated Src substrate) (CAS) (p120 catenin) (p120(ctn)) (p120(cas))	CTNND1
O60716	O60716_S349	-1.5874	0.375623	O60716	CTND1_HUMAN	Catenin delta-1 (Cadherin-associated Src substrate) (CAS) (p120 catenin) (p120(ctn)) (p120(cas))	CTNND1
O60716	O60716_S47	0.968984	0.543941	O60716	CTND1_HUMAN	Catenin delta-1 (Cadherin-associated Src substrate) (CAS) (p120 catenin) (p120(ctn)) (p120(cas))	CTNND1
O60716	O60716_S859	NA	NA	O60716	CTND1_HUMAN	Catenin delta-1 (Cadherin-associated Src substrate) (CAS) (p120 catenin) (p120(ctn)) (p120(cas))	CTNND1
O60716	O60716_S861,O60716_S864	NA	NA	O60716	CTND1_HUMAN	Catenin delta-1 (Cadherin-associated Src substrate) (CAS) (p120 catenin) (p120(ctn)) (p120(cas))	CTNND1
O60716	O60716_S861,O60716_Y865	-6.24732	NA	O60716	CTND1_HUMAN	Catenin delta-1 (Cadherin-associated Src substrate) (CAS) (p120 catenin) (p120(ctn)) (p120(cas))	CTNND1
O60716	O60716_S864	NA	NA	O60716	CTND1_HUMAN	Catenin delta-1 (Cadherin-associated Src substrate) (CAS) (p120 catenin) (p120(ctn)) (p120(cas))	CTNND1
O60716	O60716_S899	-1.08095	0.36848	O60716	CTND1_HUMAN	Catenin delta-1 (Cadherin-associated Src substrate) (CAS) (p120 catenin) (p120(ctn)) (p120(cas))	CTNND1
O60749	O60749_S82	NA	NA	O60749	SNX2_HUMAN	Sorting nexin-2 (Transformation-related gene 9 protein) (TRG-9)	SNX2
O60749	O60749_S97	NA	NA	O60749	SNX2_HUMAN	Sorting nexin-2 (Transformation-related gene 9 protein) (TRG-9)	SNX2
O60749	O60749_T104	-1.78053	0.226022	O60749	SNX2_HUMAN	Sorting nexin-2 (Transformation-related gene 9 protein) (TRG-9)	SNX2
O60762	O60762_S7	NA	NA	O60762	DPM1_HUMAN	Dolichol-phosphate mannosyltransferase (EC 2.4.1.83) (Dolichol-phosphate mannose synthase) (DPM synthase) (Dolichyl-phosphate beta-D-mannosyltransferase) (Mannose-P-dolichol synthase) (MPD synthase)	DPM1
O60762	O60762_S9	-0.498001	NA	O60762	DPM1_HUMAN	Dolichol-phosphate mannosyltransferase (EC 2.4.1.83) (Dolichol-phosphate mannose synthase) (DPM synthase) (Dolichyl-phosphate beta-D-mannosyltransferase) (Mannose-P-dolichol synthase) (MPD synthase)	DPM1
O60784	O60784_S355	-2.05157	NA	O60784	TOM1_HUMAN	Target of Myb protein 1	TOM1
O60784	O60784_S461	-0.921405	0.331641	O60784	TOM1_HUMAN	Target of Myb protein 1	TOM1
O60825	O60825_S466	-1.43611	0.146958	O60825	F262_HUMAN	6-phosphofructo-2-kinase/fructose-2,6-bisphosphatase 2 (6PF-2-K/Fru-2,6-P2ase 2) (PFK/FBPase 2) (6PF-2-K/Fru-2,6-P2ase heart-type isozyme) [Includes: 6-phosphofructo-2-kinase (EC 2.7.1.105); Fructose-2,6-bisphosphatase (EC 3.1.3.46)]	PFKFB2
O60825	O60825_S483	-1.19752	NA	O60825	F262_HUMAN	6-phosphofructo-2-kinase/fructose-2,6-bisphosphatase 2 (6PF-2-K/Fru-2,6-P2ase 2) (PFK/FBPase 2) (6PF-2-K/Fru-2,6-P2ase heart-type isozyme) [Includes: 6-phosphofructo-2-kinase (EC 2.7.1.105); Fructose-2,6-bisphosphatase (EC 3.1.3.46)]	PFKFB2
O60825	O60825_S483,O60825_S493	-0.440022	0.800906	O60825	F262_HUMAN	6-phosphofructo-2-kinase/fructose-2,6-bisphosphatase 2 (6PF-2-K/Fru-2,6-P2ase 2) (PFK/FBPase 2) (6PF-2-K/Fru-2,6-P2ase heart-type isozyme) [Includes: 6-phosphofructo-2-kinase (EC 2.7.1.105); Fructose-2,6-bisphosphatase (EC 3.1.3.46)]	PFKFB2
O60825	O60825_S493	-2.08558	0.178249	O60825	F262_HUMAN	6-phosphofructo-2-kinase/fructose-2,6-bisphosphatase 2 (6PF-2-K/Fru-2,6-P2ase 2) (PFK/FBPase 2) (6PF-2-K/Fru-2,6-P2ase heart-type isozyme) [Includes: 6-phosphofructo-2-kinase (EC 2.7.1.105); Fructose-2,6-bisphosphatase (EC 3.1.3.46)]	PFKFB2
O60832	O60832_S21	0.935586	NA	O60832	DKC1_HUMAN	H/ACA ribonucleoprotein complex subunit 4 (EC 5.4.99.-) (CBF5 homolog) (Dyskerin) (Nopp140-associated protein of 57 kDa) (Nucleolar protein NAP57) (Nucleolar protein family A member 4) (snoRNP protein DKC1)	DKC1
O60832	O60832_S451	1.28103	NA	O60832	DKC1_HUMAN	H/ACA ribonucleoprotein complex subunit 4 (EC 5.4.99.-) (CBF5 homolog) (Dyskerin) (Nopp140-associated protein of 57 kDa) (Nucleolar protein NAP57) (Nucleolar protein family A member 4) (snoRNP protein DKC1)	DKC1
O60832	O60832_S485	0.877622	NA	O60832	DKC1_HUMAN	H/ACA ribonucleoprotein complex subunit 4 (EC 5.4.99.-) (CBF5 homolog) (Dyskerin) (Nopp140-associated protein of 57 kDa) (Nucleolar protein NAP57) (Nucleolar protein family A member 4) (snoRNP protein DKC1)	DKC1
O60832	O60832_S485,O60832_S494	0.648495	NA	O60832	DKC1_HUMAN	H/ACA ribonucleoprotein complex subunit 4 (EC 5.4.99.-) (CBF5 homolog) (Dyskerin) (Nopp140-associated protein of 57 kDa) (Nucleolar protein NAP57) (Nucleolar protein family A member 4) (snoRNP protein DKC1)	DKC1
O60832	O60832_S494	0.132453	0.664095	O60832	DKC1_HUMAN	H/ACA ribonucleoprotein complex subunit 4 (EC 5.4.99.-) (CBF5 homolog) (Dyskerin) (Nopp140-associated protein of 57 kDa) (Nucleolar protein NAP57) (Nucleolar protein family A member 4) (snoRNP protein DKC1)	DKC1
O60832	O60832_S513	-0.0391302	0.948869	O60832	DKC1_HUMAN	H/ACA ribonucleoprotein complex subunit 4 (EC 5.4.99.-) (CBF5 homolog) (Dyskerin) (Nopp140-associated protein of 57 kDa) (Nucleolar protein NAP57) (Nucleolar protein family A member 4) (snoRNP protein DKC1)	DKC1
O60841	O60841_S107	0.74979	0.417712	O60841	IF2P_HUMAN	Eukaryotic translation initiation factor 5B (eIF-5B) (Translation initiation factor IF-2)	EIF5B
O60841	O60841_S107,O60841_S113	0.945841	0.14749	O60841	IF2P_HUMAN	Eukaryotic translation initiation factor 5B (eIF-5B) (Translation initiation factor IF-2)	EIF5B
O60841	O60841_S113	-1.34857	0.132156	O60841	IF2P_HUMAN	Eukaryotic translation initiation factor 5B (eIF-5B) (Translation initiation factor IF-2)	EIF5B
O60841	O60841_S137	-1.68045	0.43432	O60841	IF2P_HUMAN	Eukaryotic translation initiation factor 5B (eIF-5B) (Translation initiation factor IF-2)	EIF5B
O60841	O60841_S164	1.63601	0.259794	O60841	IF2P_HUMAN	Eukaryotic translation initiation factor 5B (eIF-5B) (Translation initiation factor IF-2)	EIF5B
O60841	O60841_S182	-0.683056	NA	O60841	IF2P_HUMAN	Eukaryotic translation initiation factor 5B (eIF-5B) (Translation initiation factor IF-2)	EIF5B
O60841	O60841_S182,O60841_S190	NA	NA	O60841	IF2P_HUMAN	Eukaryotic translation initiation factor 5B (eIF-5B) (Translation initiation factor IF-2)	EIF5B
O60841	O60841_S190	-0.506229	0.68381	O60841	IF2P_HUMAN	Eukaryotic translation initiation factor 5B (eIF-5B) (Translation initiation factor IF-2)	EIF5B
O60841	O60841_S214	-1.01692	0.363109	O60841	IF2P_HUMAN	Eukaryotic translation initiation factor 5B (eIF-5B) (Translation initiation factor IF-2)	EIF5B
O60841	O60841_Y134,O60841_S135	-0.326337	NA	O60841	IF2P_HUMAN	Eukaryotic translation initiation factor 5B (eIF-5B) (Translation initiation factor IF-2)	EIF5B
O60869	O60869_S53	1.75904	NA	O60869	EDF1_HUMAN	Endothelial differentiation-related factor 1 (EDF-1) (Multiprotein-bridging factor 1) (MBF1)	EDF1
O60885	O60885_S1117	-0.91687	0.243223	O60885	BRD4_HUMAN	Bromodomain-containing protein 4 (Protein HUNK1)	BRD4
O60885	O60885_S601	0.526853	0.494451	O60885	BRD4_HUMAN	Bromodomain-containing protein 4 (Protein HUNK1)	BRD4
O60890	O60890_S652	1.21955	NA	O60890	OPHN1_HUMAN	Oligophrenin-1	OPHN1
O60902	O60902_S92	1.51668	NA	O60902	SHOX2_HUMAN	Short stature homeobox protein 2 (Homeobox protein Og12X) (Paired-related homeobox protein SHOT)	SHOX2
O60927	O60927_S57	1.85026	0.371815	O60927	PP1RB_HUMAN	Protein phosphatase 1 regulatory subunit 11 (Hemochromatosis candidate gene V protein) (HCG V) (Protein phosphatase inhibitor 3)	PPP1R11
O60930	O60930_S74,O60930_S76	1.52855	0.456304	O60930	RNH1_HUMAN	Ribonuclease H1 (RNase H1) (EC 3.1.26.4) (Ribonuclease H type II)	RNASEH1
O60930	O60930_S76	1.10616	0.479224	O60930	RNH1_HUMAN	Ribonuclease H1 (RNase H1) (EC 3.1.26.4) (Ribonuclease H type II)	RNASEH1
O60934	O60934_S432	-1.71738	0.432005	O60934	NBN_HUMAN	Nibrin (Cell cycle regulatory protein p95) (Nijmegen breakage syndrome protein 1)	NBN
O60936	O60936_S147	-2.30093	0.439174	O60936	NOL3_HUMAN	Nucleolar protein 3 (Apoptosis repressor with CARD) (Muscle-enriched cytoplasmic protein) (Myp) (Nucleolar protein of 30 kDa) (Nop30)	NOL3
O60936	O60936_T114	-3.08788	NA	O60936	NOL3_HUMAN	Nucleolar protein 3 (Apoptosis repressor with CARD) (Muscle-enriched cytoplasmic protein) (Myp) (Nucleolar protein of 30 kDa) (Nop30)	NOL3
O60941	O60941_S394	-1.61372	0.339471	O60941	DTNB_HUMAN	Dystrobrevin beta (DTN-B) (Beta-dystrobrevin)	DTNB
O75030	O75030_S414	-1.33815	NA	O75030	MITF_HUMAN	Microphthalmia-associated transcription factor (Class E basic helix-loop-helix protein 32) (bHLHe32)	MITF
O75030	O75030_S504	-0.117835	0.907188	O75030	MITF_HUMAN	Microphthalmia-associated transcription factor (Class E basic helix-loop-helix protein 32) (bHLHe32)	MITF
O75030	O75030_S516	0.637986	NA	O75030	MITF_HUMAN	Microphthalmia-associated transcription factor (Class E basic helix-loop-helix protein 32) (bHLHe32)	MITF
O75044	O75044_S908	-3.50238	NA	O75044	SRGP2_HUMAN	SLIT-ROBO Rho GTPase-activating protein 2 (srGAP2) (Formin-binding protein 2) (Rho GTPase-activating protein 34)	SRGAP2
O75044	O75044_S909	1.381	NA	O75044	SRGP2_HUMAN	SLIT-ROBO Rho GTPase-activating protein 2 (srGAP2) (Formin-binding protein 2) (Rho GTPase-activating protein 34)	SRGAP2
O75061	O75061_S570	NA	NA	O75061	AUXI_HUMAN	Putative tyrosine-protein phosphatase auxilin (EC 3.1.3.48) (DnaJ homolog subfamily C member 6)	DNAJC6
O75096	O75096_S1887	-0.478273	0.191897	O75096	LRP4_HUMAN	Low-density lipoprotein receptor-related protein 4 (LRP-4) (Multiple epidermal growth factor-like domains 7)	LRP4
O75113	O75113_S288	1.30869	0.289584	O75113	N4BP1_HUMAN	NEDD4-binding protein 1 (N4BP1)	N4BP1
O75113	O75113_S300	-1.10243	0.538212	O75113	N4BP1_HUMAN	NEDD4-binding protein 1 (N4BP1)	N4BP1
O75113	O75113_T242	-0.462548	0.480499	O75113	N4BP1_HUMAN	NEDD4-binding protein 1 (N4BP1)	N4BP1
O75122	O75122_S1012	NA	NA	O75122	CLAP2_HUMAN	CLIP-associating protein 2 (Cytoplasmic linker-associated protein 2) (Protein Orbit homolog 2) (hOrbit2)	CLASP2
O75122	O75122_S320	-0.0163848	NA	O75122	CLAP2_HUMAN	CLIP-associating protein 2 (Cytoplasmic linker-associated protein 2) (Protein Orbit homolog 2) (hOrbit2)	CLASP2
O75122	O75122_S323	0.169655	NA	O75122	CLAP2_HUMAN	CLIP-associating protein 2 (Cytoplasmic linker-associated protein 2) (Protein Orbit homolog 2) (hOrbit2)	CLASP2
O75122	O75122_S327	-0.0287327	NA	O75122	CLAP2_HUMAN	CLIP-associating protein 2 (Cytoplasmic linker-associated protein 2) (Protein Orbit homolog 2) (hOrbit2)	CLASP2
O75122	O75122_S360	-0.336351	0.376701	O75122	CLAP2_HUMAN	CLIP-associating protein 2 (Cytoplasmic linker-associated protein 2) (Protein Orbit homolog 2) (hOrbit2)	CLASP2
O75122	O75122_S370	-0.0596143	0.856176	O75122	CLAP2_HUMAN	CLIP-associating protein 2 (Cytoplasmic linker-associated protein 2) (Protein Orbit homolog 2) (hOrbit2)	CLASP2
O75122	O75122_S459	1.61611	0.125213	O75122	CLAP2_HUMAN	CLIP-associating protein 2 (Cytoplasmic linker-associated protein 2) (Protein Orbit homolog 2) (hOrbit2)	CLASP2
O75122	O75122_S507	-0.23277	0.779417	O75122	CLAP2_HUMAN	CLIP-associating protein 2 (Cytoplasmic linker-associated protein 2) (Protein Orbit homolog 2) (hOrbit2)	CLASP2
O75122	O75122_S525	-2.48716	0.269301	O75122	CLAP2_HUMAN	CLIP-associating protein 2 (Cytoplasmic linker-associated protein 2) (Protein Orbit homolog 2) (hOrbit2)	CLASP2
O75122	O75122_S525,O75122_S529	-0.170329	NA	O75122	CLAP2_HUMAN	CLIP-associating protein 2 (Cytoplasmic linker-associated protein 2) (Protein Orbit homolog 2) (hOrbit2)	CLASP2
O75122	O75122_S529	0.349534	0.0140437	O75122	CLAP2_HUMAN	CLIP-associating protein 2 (Cytoplasmic linker-associated protein 2) (Protein Orbit homolog 2) (hOrbit2)	CLASP2
O75122	O75122_S596	2.45129	NA	O75122	CLAP2_HUMAN	CLIP-associating protein 2 (Cytoplasmic linker-associated protein 2) (Protein Orbit homolog 2) (hOrbit2)	CLASP2
O75122	O75122_T594	-4.36494	NA	O75122	CLAP2_HUMAN	CLIP-associating protein 2 (Cytoplasmic linker-associated protein 2) (Protein Orbit homolog 2) (hOrbit2)	CLASP2
O75132	O75132_T619	-2.43969	NA	O75132	ZBED4_HUMAN	Zinc finger BED domain-containing protein 4	ZBED4
O75143	O75143_S355	1.88383	NA	O75143	ATG13_HUMAN	Autophagy-related protein 13	ATG13
O75143	O75143_S361	NA	NA	O75143	ATG13_HUMAN	Autophagy-related protein 13	ATG13
O75151	O75151_S1056	1.2597	NA	O75151	PHF2_HUMAN	Lysine-specific demethylase PHF2 (EC 1.14.11.-) (GRC5) (PHD finger protein 2)	PHF2
O75151	O75151_S458	-0.162728	0.868163	O75151	PHF2_HUMAN	Lysine-specific demethylase PHF2 (EC 1.14.11.-) (GRC5) (PHD finger protein 2)	PHF2
O75151	O75151_S458,O75151_S459	0.430355	0.566101	O75151	PHF2_HUMAN	Lysine-specific demethylase PHF2 (EC 1.14.11.-) (GRC5) (PHD finger protein 2)	PHF2
O75151	O75151_S474	-1.41917	0.292386	O75151	PHF2_HUMAN	Lysine-specific demethylase PHF2 (EC 1.14.11.-) (GRC5) (PHD finger protein 2)	PHF2
O75151	O75151_S537	-0.642921	NA	O75151	PHF2_HUMAN	Lysine-specific demethylase PHF2 (EC 1.14.11.-) (GRC5) (PHD finger protein 2)	PHF2
O75151	O75151_S539	-1.98062	NA	O75151	PHF2_HUMAN	Lysine-specific demethylase PHF2 (EC 1.14.11.-) (GRC5) (PHD finger protein 2)	PHF2
O75151	O75151_S853	-3.34405	NA	O75151	PHF2_HUMAN	Lysine-specific demethylase PHF2 (EC 1.14.11.-) (GRC5) (PHD finger protein 2)	PHF2
O75151	O75151_S882	-3.73314	NA	O75151	PHF2_HUMAN	Lysine-specific demethylase PHF2 (EC 1.14.11.-) (GRC5) (PHD finger protein 2)	PHF2
O75151	O75151_S899	0.620029	0.532244	O75151	PHF2_HUMAN	Lysine-specific demethylase PHF2 (EC 1.14.11.-) (GRC5) (PHD finger protein 2)	PHF2
O75151	O75151_S899,O75151_S905	0.51323	0.385868	O75151	PHF2_HUMAN	Lysine-specific demethylase PHF2 (EC 1.14.11.-) (GRC5) (PHD finger protein 2)	PHF2
O75151;Q9UPP1	O75151_S929,Q9UPP1_S904	-1.84132	NA	O75151;Q9UPP1	PHF2_HUMAN;PHF8_HUMAN	Lysine-specific demethylase PHF2 (EC 1.14.11.-) (GRC5) (PHD finger protein 2);Histone lysine demethylase PHF8 (EC 1.14.11.27) (PHD finger protein 8)	PHF2;PHF8
O75152	O75152_S290	-1.03957	0.062743	O75152	ZC11A_HUMAN	Zinc finger CCCH domain-containing protein 11A	ZC3H11A
O75153	O75153_S664	0.0368335	NA	O75153	CLU_HUMAN	Clustered mitochondria protein homolog	CLUH
O75164	O75164_S522	0.0467449	NA	O75164	KDM4A_HUMAN	Lysine-specific demethylase 4A (EC 1.14.11.-) (JmjC domain-containing histone demethylation protein 3A) (Jumonji domain-containing protein 2A)	KDM4A
O75167	O75167_S237	1.58459	NA	O75167	PHAR2_HUMAN	Phosphatase and actin regulator 2	PHACTR2
O75167	O75167_S522	-1.28394	0.159213	O75167	PHAR2_HUMAN	Phosphatase and actin regulator 2	PHACTR2
O75167	O75167_T25	-1.00035	0.0849404	O75167	PHAR2_HUMAN	Phosphatase and actin regulator 2	PHACTR2
O75170	O75170_S771	0.234542	NA	O75170	PP6R2_HUMAN	Serine/threonine-protein phosphatase 6 regulatory subunit 2 (SAPS domain family member 2)	PPP6R2
O75175	O75175_S299	1.30066	NA	O75175	CNOT3_HUMAN	CCR4-NOT transcription complex subunit 3 (CCR4-associated factor 3) (Leukocyte receptor cluster member 2)	CNOT3
O75179	O75179_S1696,O75179_S1699,O75179_S1709	-0.206482	0.813671	O75179	ANR17_HUMAN	Ankyrin repeat domain-containing protein 17 (Gene trap ankyrin repeat protein) (Serologically defined breast cancer antigen NY-BR-16)	ANKRD17
O75179	O75179_S1709	-0.314934	0.424074	O75179	ANR17_HUMAN	Ankyrin repeat domain-containing protein 17 (Gene trap ankyrin repeat protein) (Serologically defined breast cancer antigen NY-BR-16)	ANKRD17
O75179	O75179_S2041	0.0407649	NA	O75179	ANR17_HUMAN	Ankyrin repeat domain-containing protein 17 (Gene trap ankyrin repeat protein) (Serologically defined breast cancer antigen NY-BR-16)	ANKRD17
O75179	O75179_S2041,O75179_S2042	-0.400589	0.903423	O75179	ANR17_HUMAN	Ankyrin repeat domain-containing protein 17 (Gene trap ankyrin repeat protein) (Serologically defined breast cancer antigen NY-BR-16)	ANKRD17
O75179	O75179_S2067	0.0850959	NA	O75179	ANR17_HUMAN	Ankyrin repeat domain-containing protein 17 (Gene trap ankyrin repeat protein) (Serologically defined breast cancer antigen NY-BR-16)	ANKRD17
O75179	O75179_T5	-6.22183	NA	O75179	ANR17_HUMAN	Ankyrin repeat domain-containing protein 17 (Gene trap ankyrin repeat protein) (Serologically defined breast cancer antigen NY-BR-16)	ANKRD17
O75182	O75182_S270	-0.970937	0.698547	O75182	SIN3B_HUMAN	Paired amphipathic helix protein Sin3b (Histone deacetylase complex subunit Sin3b) (Transcriptional corepressor Sin3b)	SIN3B
O75190	O75190_S277	0.256004	0.796861	O75190	DNJB6_HUMAN	DnaJ homolog subfamily B member 6 (HHDJ1) (Heat shock protein J2) (HSJ-2) (MRJ) (MSJ-1)	DNAJB6
O75351	O75351_S102	1.80964	NA	O75351	VPS4B_HUMAN	Vacuolar protein sorting-associated protein 4B (EC 3.6.4.6) (Cell migration-inducing gene 1 protein) (Suppressor of K(+) transport growth defect 1) (Protein SKD1)	VPS4B
O75362	O75362_S662	NA	NA	O75362	ZN217_HUMAN	Zinc finger protein 217	ZNF217
O75362	O75362_S795	NA	NA	O75362	ZN217_HUMAN	Zinc finger protein 217	ZNF217
O75369	O75369_S2107	-0.640786	NA	O75369	FLNB_HUMAN	Filamin-B (FLN-B) (ABP-278) (ABP-280 homolog) (Actin-binding-like protein) (Beta-filamin) (Filamin homolog 1) (Fh1) (Filamin-3) (Thyroid autoantigen) (Truncated actin-binding protein) (Truncated ABP)	FLNB
O75369	O75369_S2478	0.685861	0.685917	O75369	FLNB_HUMAN	Filamin-B (FLN-B) (ABP-278) (ABP-280 homolog) (Actin-binding-like protein) (Beta-filamin) (Filamin homolog 1) (Fh1) (Filamin-3) (Thyroid autoantigen) (Truncated actin-binding protein) (Truncated ABP)	FLNB
O75376	O75376_S1111	-1.38274	NA	O75376	NCOR1_HUMAN	Nuclear receptor corepressor 1 (N-CoR) (N-CoR1)	NCOR1
O75376	O75376_S1196	-1.43883	NA	O75376	NCOR1_HUMAN	Nuclear receptor corepressor 1 (N-CoR) (N-CoR1)	NCOR1
O75376	O75376_S1472	-0.759998	NA	O75376	NCOR1_HUMAN	Nuclear receptor corepressor 1 (N-CoR) (N-CoR1)	NCOR1
O75376	O75376_S157	-0.426159	0.655757	O75376	NCOR1_HUMAN	Nuclear receptor corepressor 1 (N-CoR) (N-CoR1)	NCOR1
O75376	O75376_S157,O75376_S172	-0.530354	NA	O75376	NCOR1_HUMAN	Nuclear receptor corepressor 1 (N-CoR) (N-CoR1)	NCOR1
O75376	O75376_S158	NA	NA	O75376	NCOR1_HUMAN	Nuclear receptor corepressor 1 (N-CoR) (N-CoR1)	NCOR1
O75376	O75376_S158,O75376_S172	NA	NA	O75376	NCOR1_HUMAN	Nuclear receptor corepressor 1 (N-CoR) (N-CoR1)	NCOR1
O75376	O75376_S1977	NA	NA	O75376	NCOR1_HUMAN	Nuclear receptor corepressor 1 (N-CoR) (N-CoR1)	NCOR1
O75376	O75376_S1977,O75376_S1981	-1.11183	NA	O75376	NCOR1_HUMAN	Nuclear receptor corepressor 1 (N-CoR) (N-CoR1)	NCOR1
O75376	O75376_S1980,O75376_S1981	-0.053384	NA	O75376	NCOR1_HUMAN	Nuclear receptor corepressor 1 (N-CoR) (N-CoR1)	NCOR1
O75376	O75376_S2098	-1.42258	NA	O75376	NCOR1_HUMAN	Nuclear receptor corepressor 1 (N-CoR) (N-CoR1)	NCOR1
O75376	O75376_S2102	0.41906	NA	O75376	NCOR1_HUMAN	Nuclear receptor corepressor 1 (N-CoR) (N-CoR1)	NCOR1
O75376	O75376_S2136	NA	NA	O75376	NCOR1_HUMAN	Nuclear receptor corepressor 1 (N-CoR) (N-CoR1)	NCOR1
O75376	O75376_S2151	-0.492645	0.0155526	O75376	NCOR1_HUMAN	Nuclear receptor corepressor 1 (N-CoR) (N-CoR1)	NCOR1
O75376	O75376_S2184	-0.54066	0.748405	O75376	NCOR1_HUMAN	Nuclear receptor corepressor 1 (N-CoR) (N-CoR1)	NCOR1
O75376	O75376_S2315	1.84551	NA	O75376	NCOR1_HUMAN	Nuclear receptor corepressor 1 (N-CoR) (N-CoR1)	NCOR1
O75376	O75376_S2335	-0.863116	0.00575417	O75376	NCOR1_HUMAN	Nuclear receptor corepressor 1 (N-CoR) (N-CoR1)	NCOR1
O75376	O75376_S2335,O75376_S2337	NA	NA	O75376	NCOR1_HUMAN	Nuclear receptor corepressor 1 (N-CoR) (N-CoR1)	NCOR1
O75376	O75376_S88	NA	NA	O75376	NCOR1_HUMAN	Nuclear receptor corepressor 1 (N-CoR) (N-CoR1)	NCOR1
O75376	O75376_S989,O75376_S990	NA	NA	O75376	NCOR1_HUMAN	Nuclear receptor corepressor 1 (N-CoR) (N-CoR1)	NCOR1
O75376	O75376_S999	2.35553	NA	O75376	NCOR1_HUMAN	Nuclear receptor corepressor 1 (N-CoR) (N-CoR1)	NCOR1
O75379	O75379_S30	-3.91123	NA	O75379	VAMP4_HUMAN	Vesicle-associated membrane protein 4 (VAMP-4)	VAMP4
O75381	O75381_S282	-2.16748	0.306955	O75381	PEX14_HUMAN	Peroxisomal membrane protein PEX14 (PTS1 receptor-docking protein) (Peroxin-14) (Peroxisomal membrane anchor protein PEX14)	PEX14
O75382	O75382_S437	1.08694	0.485232	O75382	TRIM3_HUMAN	Tripartite motif-containing protein 3 (Brain-expressed RING finger protein) (RING finger protein 22) (RING finger protein 97)	TRIM3
O75382	O75382_S7	-0.88393	0.204365	O75382	TRIM3_HUMAN	Tripartite motif-containing protein 3 (Brain-expressed RING finger protein) (RING finger protein 22) (RING finger protein 97)	TRIM3
O75385	O75385_S556	NA	NA	O75385	ULK1_HUMAN	Serine/threonine-protein kinase ULK1 (EC 2.7.11.1) (Autophagy-related protein 1 homolog) (ATG1) (hATG1) (Unc-51-like kinase 1)	ULK1
O75385	O75385_S623	-1.34289	0.397615	O75385	ULK1_HUMAN	Serine/threonine-protein kinase ULK1 (EC 2.7.11.1) (Autophagy-related protein 1 homolog) (ATG1) (hATG1) (Unc-51-like kinase 1)	ULK1
O75385	O75385_S638	-1.35344	0.0406707	O75385	ULK1_HUMAN	Serine/threonine-protein kinase ULK1 (EC 2.7.11.1) (Autophagy-related protein 1 homolog) (ATG1) (hATG1) (Unc-51-like kinase 1)	ULK1
O75391	O75391_S202	-0.8169	NA	O75391	SPAG7_HUMAN	Sperm-associated antigen 7	SPAG7
O75391	O75391_S219	-1.93129	NA	O75391	SPAG7_HUMAN	Sperm-associated antigen 7	SPAG7
O75396	O75396_S137	-0.806289	0.575703	O75396	SC22B_HUMAN	Vesicle-trafficking protein SEC22b (ER-Golgi SNARE of 24 kDa) (ERS-24) (ERS24) (SEC22 vesicle-trafficking protein homolog B) (SEC22 vesicle-trafficking protein-like 1)	SEC22B
O75400	O75400_S34	-0.39658	0.778711	O75400	PR40A_HUMAN	Pre-mRNA-processing factor 40 homolog A (Fas ligand-associated factor 1) (Formin-binding protein 11) (Formin-binding protein 3) (Huntingtin yeast partner A) (Huntingtin-interacting protein 10) (HIP-10) (Huntingtin-interacting protein A) (Renal carcinoma antigen NY-REN-6)	PRPF40A
O75400	O75400_S36	-1.59813	0.565589	O75400	PR40A_HUMAN	Pre-mRNA-processing factor 40 homolog A (Fas ligand-associated factor 1) (Formin-binding protein 11) (Formin-binding protein 3) (Huntingtin yeast partner A) (Huntingtin-interacting protein 10) (HIP-10) (Huntingtin-interacting protein A) (Renal carcinoma antigen NY-REN-6)	PRPF40A
O75400	O75400_T368	-1.36375	NA	O75400	PR40A_HUMAN	Pre-mRNA-processing factor 40 homolog A (Fas ligand-associated factor 1) (Formin-binding protein 11) (Formin-binding protein 3) (Huntingtin yeast partner A) (Huntingtin-interacting protein 10) (HIP-10) (Huntingtin-interacting protein A) (Renal carcinoma antigen NY-REN-6)	PRPF40A
O75410	O75410_S276	3.26725	NA	O75410	TACC1_HUMAN	Transforming acidic coiled-coil-containing protein 1 (Gastric cancer antigen Ga55) (Taxin-1)	TACC1
O75410	O75410_S315	-1.35535	NA	O75410	TACC1_HUMAN	Transforming acidic coiled-coil-containing protein 1 (Gastric cancer antigen Ga55) (Taxin-1)	TACC1
O75420	O75420_S157	0.770956	NA	O75420	PERQ1_HUMAN	PERQ amino acid-rich with GYF domain-containing protein 1 (GRB10-interacting GYF protein 1)	GIGYF1
O75420	O75420_S638	-1.60577	NA	O75420	PERQ1_HUMAN	PERQ amino acid-rich with GYF domain-containing protein 1 (GRB10-interacting GYF protein 1)	GIGYF1
O75420	O75420_S863	-7.86518	NA	O75420	PERQ1_HUMAN	PERQ amino acid-rich with GYF domain-containing protein 1 (GRB10-interacting GYF protein 1)	GIGYF1
O75427	O75427_S25	0.0447078	NA	O75427	LRCH4_HUMAN	Leucine-rich repeat and calponin homology domain-containing protein 4 (Leucine-rich repeat neuronal protein 4) (Leucine-rich neuronal protein)	LRCH4
O75448	O75448_S873	-1.45589	NA	O75448	MED24_HUMAN	Mediator of RNA polymerase II transcription subunit 24 (Activator-recruited cofactor 100 kDa component) (ARC100) (Cofactor required for Sp1 transcriptional activation subunit 4) (CRSP complex subunit 4) (Mediator complex subunit 24) (Thyroid hormone receptor-associated protein 4) (Thyroid hormone receptor-associated protein complex 100 kDa component) (Trap100) (hTRAP100) (Vitamin D3 receptor-inte…	MED24
O75475	O75475_S105	-0.0388308	0.95865	O75475	PSIP1_HUMAN	PC4 and SFRS1-interacting protein (CLL-associated antigen KW-7) (Dense fine speckles 70 kDa protein) (DFS 70) (Lens epithelium-derived growth factor) (Transcriptional coactivator p75/p52)	PSIP1
O75475	O75475_S105,O75475_S106	0.521585	NA	O75475	PSIP1_HUMAN	PC4 and SFRS1-interacting protein (CLL-associated antigen KW-7) (Dense fine speckles 70 kDa protein) (DFS 70) (Lens epithelium-derived growth factor) (Transcriptional coactivator p75/p52)	PSIP1
O75475	O75475_S106	0.473683	NA	O75475	PSIP1_HUMAN	PC4 and SFRS1-interacting protein (CLL-associated antigen KW-7) (Dense fine speckles 70 kDa protein) (DFS 70) (Lens epithelium-derived growth factor) (Transcriptional coactivator p75/p52)	PSIP1
O75475	O75475_S116	0.787173	NA	O75475	PSIP1_HUMAN	PC4 and SFRS1-interacting protein (CLL-associated antigen KW-7) (Dense fine speckles 70 kDa protein) (DFS 70) (Lens epithelium-derived growth factor) (Transcriptional coactivator p75/p52)	PSIP1
O75475	O75475_S129	1.02986	0.348949	O75475	PSIP1_HUMAN	PC4 and SFRS1-interacting protein (CLL-associated antigen KW-7) (Dense fine speckles 70 kDa protein) (DFS 70) (Lens epithelium-derived growth factor) (Transcriptional coactivator p75/p52)	PSIP1
O75475	O75475_S177	-0.81877	0.784095	O75475	PSIP1_HUMAN	PC4 and SFRS1-interacting protein (CLL-associated antigen KW-7) (Dense fine speckles 70 kDa protein) (DFS 70) (Lens epithelium-derived growth factor) (Transcriptional coactivator p75/p52)	PSIP1
O75475	O75475_S206	NA	NA	O75475	PSIP1_HUMAN	PC4 and SFRS1-interacting protein (CLL-associated antigen KW-7) (Dense fine speckles 70 kDa protein) (DFS 70) (Lens epithelium-derived growth factor) (Transcriptional coactivator p75/p52)	PSIP1
O75475	O75475_S271	-0.637825	0.398082	O75475	PSIP1_HUMAN	PC4 and SFRS1-interacting protein (CLL-associated antigen KW-7) (Dense fine speckles 70 kDa protein) (DFS 70) (Lens epithelium-derived growth factor) (Transcriptional coactivator p75/p52)	PSIP1
O75475	O75475_S271,O75475_S275	-3.4381	NA	O75475	PSIP1_HUMAN	PC4 and SFRS1-interacting protein (CLL-associated antigen KW-7) (Dense fine speckles 70 kDa protein) (DFS 70) (Lens epithelium-derived growth factor) (Transcriptional coactivator p75/p52)	PSIP1
O75475	O75475_S273	0.034805	0.979844	O75475	PSIP1_HUMAN	PC4 and SFRS1-interacting protein (CLL-associated antigen KW-7) (Dense fine speckles 70 kDa protein) (DFS 70) (Lens epithelium-derived growth factor) (Transcriptional coactivator p75/p52)	PSIP1
O75475	O75475_S275	0.135732	0.937695	O75475	PSIP1_HUMAN	PC4 and SFRS1-interacting protein (CLL-associated antigen KW-7) (Dense fine speckles 70 kDa protein) (DFS 70) (Lens epithelium-derived growth factor) (Transcriptional coactivator p75/p52)	PSIP1
O75475	O75475_T115	0.345003	NA	O75475	PSIP1_HUMAN	PC4 and SFRS1-interacting protein (CLL-associated antigen KW-7) (Dense fine speckles 70 kDa protein) (DFS 70) (Lens epithelium-derived growth factor) (Transcriptional coactivator p75/p52)	PSIP1
O75475	O75475_T122	-0.322924	NA	O75475	PSIP1_HUMAN	PC4 and SFRS1-interacting protein (CLL-associated antigen KW-7) (Dense fine speckles 70 kDa protein) (DFS 70) (Lens epithelium-derived growth factor) (Transcriptional coactivator p75/p52)	PSIP1
O75475	O75475_T122,O75475_S129	1.82626	0.251402	O75475	PSIP1_HUMAN	PC4 and SFRS1-interacting protein (CLL-associated antigen KW-7) (Dense fine speckles 70 kDa protein) (DFS 70) (Lens epithelium-derived growth factor) (Transcriptional coactivator p75/p52)	PSIP1
O75475	O75475_T141	-1.4065	NA	O75475	PSIP1_HUMAN	PC4 and SFRS1-interacting protein (CLL-associated antigen KW-7) (Dense fine speckles 70 kDa protein) (DFS 70) (Lens epithelium-derived growth factor) (Transcriptional coactivator p75/p52)	PSIP1
O75475	O75475_T270	-1.45607	NA	O75475	PSIP1_HUMAN	PC4 and SFRS1-interacting protein (CLL-associated antigen KW-7) (Dense fine speckles 70 kDa protein) (DFS 70) (Lens epithelium-derived growth factor) (Transcriptional coactivator p75/p52)	PSIP1
O75475	O75475_T270,O75475_S271	4.15817	NA	O75475	PSIP1_HUMAN	PC4 and SFRS1-interacting protein (CLL-associated antigen KW-7) (Dense fine speckles 70 kDa protein) (DFS 70) (Lens epithelium-derived growth factor) (Transcriptional coactivator p75/p52)	PSIP1
O75475	O75475_T272,O75475_S275	5.6128	NA	O75475	PSIP1_HUMAN	PC4 and SFRS1-interacting protein (CLL-associated antigen KW-7) (Dense fine speckles 70 kDa protein) (DFS 70) (Lens epithelium-derived growth factor) (Transcriptional coactivator p75/p52)	PSIP1
O75494	O75494_S133	-0.628971	NA	O75494	SRS10_HUMAN	Serine/arginine-rich splicing factor 10 (40 kDa SR-repressor protein) (SRrp40) (FUS-interacting serine-arginine-rich protein 1) (Splicing factor SRp38) (Splicing factor, arginine/serine-rich 13A) (TLS-associated protein with Ser-Arg repeats) (TASR) (TLS-associated protein with SR repeats) (TLS-associated serine-arginine protein) (TLS-associated SR protein)	SRSF10
O75494	O75494_S256	-0.426189	NA	O75494	SRS10_HUMAN	Serine/arginine-rich splicing factor 10 (40 kDa SR-repressor protein) (SRrp40) (FUS-interacting serine-arginine-rich protein 1) (Splicing factor SRp38) (Splicing factor, arginine/serine-rich 13A) (TLS-associated protein with Ser-Arg repeats) (TASR) (TLS-associated protein with SR repeats) (TLS-associated serine-arginine protein) (TLS-associated SR protein)	SRSF10
O75528	O75528_S298	NA	NA	O75528	TADA3_HUMAN	Transcriptional adapter 3 (ADA3 homolog) (hADA3) (STAF54) (Transcriptional adapter 3-like) (ADA3-like protein)	TADA3
O75531	O75531_S4	0.43963	NA	O75531	BAF_HUMAN	Barrier-to-autointegration factor (Breakpoint cluster region protein 1)	BANF1
O75533	O75533_S488	-0.312373	0.858016	O75533	SF3B1_HUMAN	Splicing factor 3B subunit 1 (Pre-mRNA-splicing factor SF3b 155 kDa subunit) (SF3b155) (Spliceosome-associated protein 155) (SAP 155)	SF3B1
O75534	O75534_T443	-0.607977	NA	O75534	CSDE1_HUMAN	Cold shock domain-containing protein E1 (N-ras upstream gene protein) (Protein UNR)	CSDE1
O75534	O75534_T444	NA	NA	O75534	CSDE1_HUMAN	Cold shock domain-containing protein E1 (N-ras upstream gene protein) (Protein UNR)	CSDE1
O75554	O75554_S277	0.405942	0.777293	O75554	WBP4_HUMAN	WW domain-binding protein 4 (WBP-4) (Formin-binding protein 21) (WW domain-containing-binding protein 4)	WBP4
O75569	O75569_S18	-0.355027	NA	O75569	PRKRA_HUMAN	Interferon-inducible double stranded RNA-dependent protein kinase activator A (PKR-associated protein X) (PKR-associating protein X) (Protein activator of the interferon-induced protein kinase) (Protein kinase, interferon-inducible double stranded RNA-dependent activator)	PRKRA
O75592	O75592_S2643	-0.814941	NA	O75592	MYCB2_HUMAN	Probable E3 ubiquitin-protein ligase MYCBP2 (EC 6.3.2.-) (Myc-binding protein 2) (Pam/highwire/rpm-1 protein) (Protein associated with Myc)	MYCBP2
O75592	O75592_S2749	NA	NA	O75592	MYCB2_HUMAN	Probable E3 ubiquitin-protein ligase MYCBP2 (EC 6.3.2.-) (Myc-binding protein 2) (Pam/highwire/rpm-1 protein) (Protein associated with Myc)	MYCBP2
O75592	O75592_S2749,O75592_S2751	-1.48119	NA	O75592	MYCB2_HUMAN	Probable E3 ubiquitin-protein ligase MYCBP2 (EC 6.3.2.-) (Myc-binding protein 2) (Pam/highwire/rpm-1 protein) (Protein associated with Myc)	MYCBP2
O75592	O75592_S2751	-1.71457	NA	O75592	MYCB2_HUMAN	Probable E3 ubiquitin-protein ligase MYCBP2 (EC 6.3.2.-) (Myc-binding protein 2) (Pam/highwire/rpm-1 protein) (Protein associated with Myc)	MYCBP2
O75592	O75592_S2806	1.16373	0.262225	O75592	MYCB2_HUMAN	Probable E3 ubiquitin-protein ligase MYCBP2 (EC 6.3.2.-) (Myc-binding protein 2) (Pam/highwire/rpm-1 protein) (Protein associated with Myc)	MYCBP2
O75592	O75592_S2833	-0.461527	0.678907	O75592	MYCB2_HUMAN	Probable E3 ubiquitin-protein ligase MYCBP2 (EC 6.3.2.-) (Myc-binding protein 2) (Pam/highwire/rpm-1 protein) (Protein associated with Myc)	MYCBP2
O75592	O75592_S2882	-1.7732	NA	O75592	MYCB2_HUMAN	Probable E3 ubiquitin-protein ligase MYCBP2 (EC 6.3.2.-) (Myc-binding protein 2) (Pam/highwire/rpm-1 protein) (Protein associated with Myc)	MYCBP2
O75592	O75592_S3467	-0.932688	NA	O75592	MYCB2_HUMAN	Probable E3 ubiquitin-protein ligase MYCBP2 (EC 6.3.2.-) (Myc-binding protein 2) (Pam/highwire/rpm-1 protein) (Protein associated with Myc)	MYCBP2
O75592	O75592_T2645	-0.718843	NA	O75592	MYCB2_HUMAN	Probable E3 ubiquitin-protein ligase MYCBP2 (EC 6.3.2.-) (Myc-binding protein 2) (Pam/highwire/rpm-1 protein) (Protein associated with Myc)	MYCBP2
O75643	O75643_S225	0.181661	0.844206	O75643	U520_HUMAN	U5 small nuclear ribonucleoprotein 200 kDa helicase (EC 3.6.4.13) (Activating signal cointegrator 1 complex subunit 3-like 1) (BRR2 homolog) (U5 snRNP-specific 200 kDa protein) (U5-200KD)	SNRNP200
O75665	O75665_S669	-4.09138	NA	O75665	OFD1_HUMAN	Oral-facial-digital syndrome 1 protein (Protein 71-7A)	OFD1
O75665	O75665_S735	-1.59819	NA	O75665	OFD1_HUMAN	Oral-facial-digital syndrome 1 protein (Protein 71-7A)	OFD1
O75676	O75676_S347	-1.3585	0.116597	O75676	KS6A4_HUMAN	Ribosomal protein S6 kinase alpha-4 (S6K-alpha-4) (EC 2.7.11.1) (90 kDa ribosomal protein S6 kinase 4) (Nuclear mitogen- and stress-activated protein kinase 2) (Ribosomal protein kinase B) (RSKB)	RPS6KA4
O75676	O75676_S681	-1.29198	0.0419307	O75676	KS6A4_HUMAN	Ribosomal protein S6 kinase alpha-4 (S6K-alpha-4) (EC 2.7.11.1) (90 kDa ribosomal protein S6 kinase 4) (Nuclear mitogen- and stress-activated protein kinase 2) (Ribosomal protein kinase B) (RSKB)	RPS6KA4
O75676	O75676_Y342,O75676_S347	-1.30903	NA	O75676	KS6A4_HUMAN	Ribosomal protein S6 kinase alpha-4 (S6K-alpha-4) (EC 2.7.11.1) (90 kDa ribosomal protein S6 kinase 4) (Nuclear mitogen- and stress-activated protein kinase 2) (Ribosomal protein kinase B) (RSKB)	RPS6KA4
O75683	O75683_S138	-0.714587	0.574121	O75683	SURF6_HUMAN	Surfeit locus protein 6	SURF6
O75691	O75691_T1741	-0.0496837	0.945733	O75691	UTP20_HUMAN	Small subunit processome component 20 homolog (Down-regulated in metastasis protein) (Novel nucleolar protein 73) (NNP73) (Protein Key-1A6)	UTP20
O75717	O75717_S374	-4.61933	NA	O75717	WDHD1_HUMAN	WD repeat and HMG-box DNA-binding protein 1 (Acidic nucleoplasmic DNA-binding protein 1) (And-1)	WDHD1
O75717	O75717_S383	NA	NA	O75717	WDHD1_HUMAN	WD repeat and HMG-box DNA-binding protein 1 (Acidic nucleoplasmic DNA-binding protein 1) (And-1)	WDHD1
O75717	O75717_S868	0.182079	NA	O75717	WDHD1_HUMAN	WD repeat and HMG-box DNA-binding protein 1 (Acidic nucleoplasmic DNA-binding protein 1) (And-1)	WDHD1
O75762	O75762_T984,O75762_S985	-0.962229	NA	O75762	TRPA1_HUMAN	Transient receptor potential cation channel subfamily A member 1 (Ankyrin-like with transmembrane domains protein 1) (Transformation-sensitive protein p120)	TRPA1
O75781	O75781_S116	-1.6063	NA	O75781	PALM_HUMAN	Paralemmin-1 (Paralemmin)	PALM
O75781	O75781_S124	-0.791398	0.422882	O75781	PALM_HUMAN	Paralemmin-1 (Paralemmin)	PALM
O75815	O75815_T368	-0.39073	0.629244	O75815	BCAR3_HUMAN	Breast cancer anti-estrogen resistance protein 3 (Novel SH2-containing protein 2) (SH2 domain-containing protein 3B)	BCAR3
O75821	O75821_T38	-1.00832	NA	O75821	EIF3G_HUMAN	Eukaryotic translation initiation factor 3 subunit G (eIF3g) (Eukaryotic translation initiation factor 3 RNA-binding subunit) (eIF-3 RNA-binding subunit) (Eukaryotic translation initiation factor 3 subunit 4) (eIF-3-delta) (eIF3 p42) (eIF3 p44)	EIF3G
O75821	O75821_T41	-2.59449	NA	O75821	EIF3G_HUMAN	Eukaryotic translation initiation factor 3 subunit G (eIF3g) (Eukaryotic translation initiation factor 3 RNA-binding subunit) (eIF-3 RNA-binding subunit) (Eukaryotic translation initiation factor 3 subunit 4) (eIF-3-delta) (eIF3 p42) (eIF3 p44)	EIF3G
O75822	O75822_S11	-1.59787	0.717236	O75822	EIF3J_HUMAN	Eukaryotic translation initiation factor 3 subunit J (eIF3j) (Eukaryotic translation initiation factor 3 subunit 1) (eIF-3-alpha) (eIF3 p35)	EIF3J
O75822	O75822_S13	4.24404	NA	O75822	EIF3J_HUMAN	Eukaryotic translation initiation factor 3 subunit J (eIF3j) (Eukaryotic translation initiation factor 3 subunit 1) (eIF-3-alpha) (eIF3 p35)	EIF3J
O75822	O75822_T109	-0.9642	NA	O75822	EIF3J_HUMAN	Eukaryotic translation initiation factor 3 subunit J (eIF3j) (Eukaryotic translation initiation factor 3 subunit 1) (eIF-3-alpha) (eIF3 p35)	EIF3J
O75864	O75864_S544	-0.0950036	0.884777	O75864	PPR37_HUMAN	Protein phosphatase 1 regulatory subunit 37 (Leucine-rich repeat-containing protein 68)	PPP1R37
O75864	O75864_S560	-0.307516	NA	O75864	PPR37_HUMAN	Protein phosphatase 1 regulatory subunit 37 (Leucine-rich repeat-containing protein 68)	PPP1R37
O75864	O75864_S561	1.9638	NA	O75864	PPR37_HUMAN	Protein phosphatase 1 regulatory subunit 37 (Leucine-rich repeat-containing protein 68)	PPP1R37
O75907	O75907_T12	0.474053	NA	O75907	DGAT1_HUMAN	Diacylglycerol O-acyltransferase 1 (EC 2.3.1.20) (ACAT-related gene product 1) (Acyl-CoA retinol O-fatty-acyltransferase) (ARAT) (Retinol O-fatty-acyltransferase) (EC 2.3.1.76) (Diglyceride acyltransferase)	DGAT1
O75909	O75909_S324	2.79299	NA	O75909	CCNK_HUMAN	Cyclin-K	CCNK
O75909	O75909_S328	0.473508	0.69025	O75909	CCNK_HUMAN	Cyclin-K	CCNK
O75909	O75909_S340	1.71351	NA	O75909	CCNK_HUMAN	Cyclin-K	CCNK
O75925	O75925_S497	-3.59211	NA	O75925	PIAS1_HUMAN	E3 SUMO-protein ligase PIAS1 (EC 6.3.2.-) (DEAD/H box-binding protein 1) (Gu-binding protein) (GBP) (Protein inhibitor of activated STAT protein 1) (RNA helicase II-binding protein)	PIAS1
O75925	O75925_S503	-2.36438	NA	O75925	PIAS1_HUMAN	E3 SUMO-protein ligase PIAS1 (EC 6.3.2.-) (DEAD/H box-binding protein 1) (Gu-binding protein) (GBP) (Protein inhibitor of activated STAT protein 1) (RNA helicase II-binding protein)	PIAS1
O75962	O75962_S1785,O75962_S1786	1.74219	NA	O75962	TRIO_HUMAN	Triple functional domain protein (EC 2.7.11.1) (PTPRF-interacting protein)	TRIO
O75962	O75962_S1814	-0.953525	0.692738	O75962	TRIO_HUMAN	Triple functional domain protein (EC 2.7.11.1) (PTPRF-interacting protein)	TRIO
O75962	O75962_S2417	1.02628	NA	O75962	TRIO_HUMAN	Triple functional domain protein (EC 2.7.11.1) (PTPRF-interacting protein)	TRIO
O75962	O75962_S2428	NA	NA	O75962	TRIO_HUMAN	Triple functional domain protein (EC 2.7.11.1) (PTPRF-interacting protein)	TRIO
O75962	O75962_S2429	NA	NA	O75962	TRIO_HUMAN	Triple functional domain protein (EC 2.7.11.1) (PTPRF-interacting protein)	TRIO
O75962	O75962_S2455	-1.01251	0.580823	O75962	TRIO_HUMAN	Triple functional domain protein (EC 2.7.11.1) (PTPRF-interacting protein)	TRIO
O76021	O76021_S361	-3.23617	NA	O76021	RL1D1_HUMAN	Ribosomal L1 domain-containing protein 1 (CATX-11) (Cellular senescence-inhibited gene protein) (Protein PBK1)	RSL1D1
O76021	O76021_S392	2.78192	NA	O76021	RL1D1_HUMAN	Ribosomal L1 domain-containing protein 1 (CATX-11) (Cellular senescence-inhibited gene protein) (Protein PBK1)	RSL1D1
O76021	O76021_S392,O76021_S396	NA	NA	O76021	RL1D1_HUMAN	Ribosomal L1 domain-containing protein 1 (CATX-11) (Cellular senescence-inhibited gene protein) (Protein PBK1)	RSL1D1
O76021	O76021_S443	0.0656114	0.960271	O76021	RL1D1_HUMAN	Ribosomal L1 domain-containing protein 1 (CATX-11) (Cellular senescence-inhibited gene protein) (Protein PBK1)	RSL1D1
O76021	O76021_T358	-2.62279	0.414882	O76021	RL1D1_HUMAN	Ribosomal L1 domain-containing protein 1 (CATX-11) (Cellular senescence-inhibited gene protein) (Protein PBK1)	RSL1D1
O76024	O76024_S32	-0.175711	0.747491	O76024	WFS1_HUMAN	Wolframin	WFS1
O76031	O76031_S617	0.119962	NA	O76031	CLPX_HUMAN	ATP-dependent Clp protease ATP-binding subunit clpX-like, mitochondrial	CLPX
O76064	O76064_S157	0.0319917	NA	O76064	RNF8_HUMAN	E3 ubiquitin-protein ligase RNF8 (hRNF8) (EC 6.3.2.-) (RING finger protein 8)	RNF8
O76094	O76094_S620	-1.40013	NA	O76094	SRP72_HUMAN	Signal recognition particle 72 kDa protein (SRP72)	SRP72
O76094	O76094_S620,O76094_S621	-0.944876	NA	O76094	SRP72_HUMAN	Signal recognition particle 72 kDa protein (SRP72)	SRP72
O94761	O94761_S251	NA	NA	O94761	RECQ4_HUMAN	ATP-dependent DNA helicase Q4 (EC 3.6.4.12) (DNA helicase, RecQ-like type 4) (RecQ4) (RTS) (RecQ protein-like 4)	RECQL4
O94761	O94761_S27	-0.071115	0.927385	O94761	RECQ4_HUMAN	ATP-dependent DNA helicase Q4 (EC 3.6.4.12) (DNA helicase, RecQ-like type 4) (RecQ4) (RTS) (RecQ protein-like 4)	RECQL4
O94761	O94761_S323	0.320237	NA	O94761	RECQ4_HUMAN	ATP-dependent DNA helicase Q4 (EC 3.6.4.12) (DNA helicase, RecQ-like type 4) (RecQ4) (RTS) (RecQ protein-like 4)	RECQL4
O94761	O94761_S89	1.01187	0.580132	O94761	RECQ4_HUMAN	ATP-dependent DNA helicase Q4 (EC 3.6.4.12) (DNA helicase, RecQ-like type 4) (RecQ4) (RTS) (RecQ protein-like 4)	RECQL4
O94762	O94762_S727	NA	NA	O94762	RECQ5_HUMAN	ATP-dependent DNA helicase Q5 (EC 3.6.4.12) (DNA helicase, RecQ-like type 5) (RecQ5) (RecQ protein-like 5)	RECQL5
O94762	O94762_S815	-0.011695	NA	O94762	RECQ5_HUMAN	ATP-dependent DNA helicase Q5 (EC 3.6.4.12) (DNA helicase, RecQ-like type 5) (RecQ5) (RecQ protein-like 5)	RECQL5
O94763	O94763_S372	-0.380649	NA	O94763	RMP_HUMAN	Unconventional prefoldin RPB5 interactor 1 (Protein NNX3) (Protein phosphatase 1 regulatory subunit 19) (RNA polymerase II subunit 5-mediating protein) (RPB5-mediating protein)	URI1
O94763	O94763_S440	-0.793292	0.434471	O94763	RMP_HUMAN	Unconventional prefoldin RPB5 interactor 1 (Protein NNX3) (Protein phosphatase 1 regulatory subunit 19) (RNA polymerase II subunit 5-mediating protein) (RPB5-mediating protein)	URI1
O94776	O94776_S435	-0.858133	0.212442	O94776	MTA2_HUMAN	Metastasis-associated protein MTA2 (Metastasis-associated 1-like 1) (MTA1-L1 protein) (p53 target protein in deacetylase complex)	MTA2
O94782	O94782_S475	-0.801644	NA	O94782	UBP1_HUMAN	Ubiquitin carboxyl-terminal hydrolase 1 (EC 3.4.19.12) (Deubiquitinating enzyme 1) (hUBP) (Ubiquitin thioesterase 1) (Ubiquitin-specific-processing protease 1)	USP1
O94782	O94782_S66	-1.20894	NA	O94782	UBP1_HUMAN	Ubiquitin carboxyl-terminal hydrolase 1 (EC 3.4.19.12) (Deubiquitinating enzyme 1) (hUBP) (Ubiquitin thioesterase 1) (Ubiquitin-specific-processing protease 1)	USP1
O94782	O94782_S67	-0.769433	0.114924	O94782	UBP1_HUMAN	Ubiquitin carboxyl-terminal hydrolase 1 (EC 3.4.19.12) (Deubiquitinating enzyme 1) (hUBP) (Ubiquitin thioesterase 1) (Ubiquitin-specific-processing protease 1)	USP1
O94804	O94804_S20	1.94022	NA	O94804	STK10_HUMAN	Serine/threonine-protein kinase 10 (EC 2.7.11.1) (Lymphocyte-oriented kinase)	STK10
O94804	O94804_S438	NA	NA	O94804	STK10_HUMAN	Serine/threonine-protein kinase 10 (EC 2.7.11.1) (Lymphocyte-oriented kinase)	STK10
O94806	O94806_S213	-1.36767	0.630796	O94806	KPCD3_HUMAN	Serine/threonine-protein kinase D3 (EC 2.7.11.13) (Protein kinase C nu type) (Protein kinase EPK2) (nPKC-nu)	PRKD3
O94811	O94811_S159	-0.119361	NA	O94811	TPPP_HUMAN	Tubulin polymerization-promoting protein (TPPP) (25 kDa brain-specific protein) (TPPP/p25) (p24) (p25-alpha)	TPPP
O94811	O94811_S32	-1.53612	0.577811	O94811	TPPP_HUMAN	Tubulin polymerization-promoting protein (TPPP) (25 kDa brain-specific protein) (TPPP/p25) (p24) (p25-alpha)	TPPP
O94811	O94811_T14	NA	NA	O94811	TPPP_HUMAN	Tubulin polymerization-promoting protein (TPPP) (25 kDa brain-specific protein) (TPPP/p25) (p24) (p25-alpha)	TPPP
O94819	O94819_S107	-0.953934	NA	O94819	KBTBB_HUMAN	Kelch repeat and BTB domain-containing protein 11 (Chronic myelogenous leukemia-associated protein) (Kelch domain-containing protein 7B)	KBTBD11
O94826	O94826_S91	-1.0954	0.350333	O94826	TOM70_HUMAN	Mitochondrial import receptor subunit TOM70 (Mitochondrial precursor proteins import receptor) (Translocase of outer membrane 70 kDa subunit)	TOMM70A
O94826	O94826_T85	-0.0106077	0.994954	O94826	TOM70_HUMAN	Mitochondrial import receptor subunit TOM70 (Mitochondrial precursor proteins import receptor) (Translocase of outer membrane 70 kDa subunit)	TOMM70A
O94826	O94826_T85,O94826_S91	-0.382257	0.631874	O94826	TOM70_HUMAN	Mitochondrial import receptor subunit TOM70 (Mitochondrial precursor proteins import receptor) (Translocase of outer membrane 70 kDa subunit)	TOMM70A
O94827	O94827_S224	-1.20122	0.450898	O94827	PKHG5_HUMAN	Pleckstrin homology domain-containing family G member 5 (PH domain-containing family G member 5) (Guanine nucleotide exchange factor 720) (GEF720)	PLEKHG5
O94827	O94827_S249	-2.35808	0.0998724	O94827	PKHG5_HUMAN	Pleckstrin homology domain-containing family G member 5 (PH domain-containing family G member 5) (Guanine nucleotide exchange factor 720) (GEF720)	PLEKHG5
O94842	O94842_S174	-2.44691	NA	O94842	TOX4_HUMAN	TOX high mobility group box family member 4 (Epidermal Langerhans cell protein LCP1)	TOX4
O94842	O94842_T175,O94842_S182	-0.448499	0.732261	O94842	TOX4_HUMAN	TOX high mobility group box family member 4 (Epidermal Langerhans cell protein LCP1)	TOX4
O94842	O94842_T175,O94842_T176	-0.514303	NA	O94842	TOX4_HUMAN	TOX high mobility group box family member 4 (Epidermal Langerhans cell protein LCP1)	TOX4
O94842	O94842_T175,O94842_T176,O94842_S182	NA	NA	O94842	TOX4_HUMAN	TOX high mobility group box family member 4 (Epidermal Langerhans cell protein LCP1)	TOX4
O94842	O94842_T176,O94842_S178,O94842_S182	NA	NA	O94842	TOX4_HUMAN	TOX high mobility group box family member 4 (Epidermal Langerhans cell protein LCP1)	TOX4
O94842	O94842_T180	NA	NA	O94842	TOX4_HUMAN	TOX high mobility group box family member 4 (Epidermal Langerhans cell protein LCP1)	TOX4
O94864	O94864_S104	0.292499	NA	O94864	ST65G_HUMAN	STAGA complex 65 subunit gamma (Adenocarcinoma antigen ART1) (SPTF-associated factor 65 gamma) (STAF65gamma) (Suppressor of Ty 7-like)	SUPT7L
O94864	O94864_S108	-2.32209	0.315441	O94864	ST65G_HUMAN	STAGA complex 65 subunit gamma (Adenocarcinoma antigen ART1) (SPTF-associated factor 65 gamma) (STAF65gamma) (Suppressor of Ty 7-like)	SUPT7L
O94864	O94864_S20	-4.64013	NA	O94864	ST65G_HUMAN	STAGA complex 65 subunit gamma (Adenocarcinoma antigen ART1) (SPTF-associated factor 65 gamma) (STAF65gamma) (Suppressor of Ty 7-like)	SUPT7L
O94864	O94864_S328	-1.35081	NA	O94864	ST65G_HUMAN	STAGA complex 65 subunit gamma (Adenocarcinoma antigen ART1) (SPTF-associated factor 65 gamma) (STAF65gamma) (Suppressor of Ty 7-like)	SUPT7L
O94876	O94876_S382	-0.0831766	0.923877	O94876	TMCC1_HUMAN	Transmembrane and coiled-coil domains protein 1	TMCC1
O94876	O94876_S413	-2.1479	0.16095	O94876	TMCC1_HUMAN	Transmembrane and coiled-coil domains protein 1	TMCC1
O94880	O94880_S835	0.491135	0.468302	O94880	PHF14_HUMAN	PHD finger protein 14	PHF14
O94885	O94885_S407	-1.06502	NA	O94885	SASH1_HUMAN	SAM and SH3 domain-containing protein 1 (Proline-glutamate repeat-containing protein)	SASH1
O94885	O94885_S743	0.561454	0.585782	O94885	SASH1_HUMAN	SAM and SH3 domain-containing protein 1 (Proline-glutamate repeat-containing protein)	SASH1
O94885	O94885_S813	NA	NA	O94885	SASH1_HUMAN	SAM and SH3 domain-containing protein 1 (Proline-glutamate repeat-containing protein)	SASH1
O94888	O94888_S280	-3.37681	NA	O94888	UBXN7_HUMAN	UBX domain-containing protein 7	UBXN7
O94901	O94901_S96	1.41013	NA	O94901	SUN1_HUMAN	SUN domain-containing protein 1 (Protein unc-84 homolog A) (Sad1/unc-84 protein-like 1)	SUN1
O94913	O94913_S368,O94913_S370,O94913_S372	2.00807	NA	O94913	PCF11_HUMAN	Pre-mRNA cleavage complex 2 protein Pcf11 (Pre-mRNA cleavage complex II protein Pcf11)	PCF11
O94913	O94913_S370,O94913_S372	1.32598	0.351923	O94913	PCF11_HUMAN	Pre-mRNA cleavage complex 2 protein Pcf11 (Pre-mRNA cleavage complex II protein Pcf11)	PCF11
O94913	O94913_S487,O94913_S489,O94913_S494	-0.962216	NA	O94913	PCF11_HUMAN	Pre-mRNA cleavage complex 2 protein Pcf11 (Pre-mRNA cleavage complex II protein Pcf11)	PCF11
O94913	O94913_S489	-0.426643	0.675705	O94913	PCF11_HUMAN	Pre-mRNA cleavage complex 2 protein Pcf11 (Pre-mRNA cleavage complex II protein Pcf11)	PCF11
O94913	O94913_S489,O94913_S494	0.573027	0.21916	O94913	PCF11_HUMAN	Pre-mRNA cleavage complex 2 protein Pcf11 (Pre-mRNA cleavage complex II protein Pcf11)	PCF11
O94913	O94913_S494	-0.141795	0.898774	O94913	PCF11_HUMAN	Pre-mRNA cleavage complex 2 protein Pcf11 (Pre-mRNA cleavage complex II protein Pcf11)	PCF11
O94913	O94913_S511	0.895582	NA	O94913	PCF11_HUMAN	Pre-mRNA cleavage complex 2 protein Pcf11 (Pre-mRNA cleavage complex II protein Pcf11)	PCF11
O94913	O94913_S777	-3.59898	NA	O94913	PCF11_HUMAN	Pre-mRNA cleavage complex 2 protein Pcf11 (Pre-mRNA cleavage complex II protein Pcf11)	PCF11
O94913	O94913_T1530	-0.909091	NA	O94913	PCF11_HUMAN	Pre-mRNA cleavage complex 2 protein Pcf11 (Pre-mRNA cleavage complex II protein Pcf11)	PCF11
O94915	O94915_S1978	-1.87924	NA	O94915	FRYL_HUMAN	Protein furry homolog-like (ALL1-fused gene from chromosome 4p12 protein)	FRYL
O94915	O94915_S2330	-0.561703	NA	O94915	FRYL_HUMAN	Protein furry homolog-like (ALL1-fused gene from chromosome 4p12 protein)	FRYL
O94915	O94915_T1959	-0.321558	NA	O94915	FRYL_HUMAN	Protein furry homolog-like (ALL1-fused gene from chromosome 4p12 protein)	FRYL
O94915	O94915_T1976	NA	NA	O94915	FRYL_HUMAN	Protein furry homolog-like (ALL1-fused gene from chromosome 4p12 protein)	FRYL
O94916	O94916_S560	-1.55354	NA	O94916	NFAT5_HUMAN	Nuclear factor of activated T-cells 5 (NF-AT5) (T-cell transcription factor NFAT5) (Tonicity-responsive enhancer-binding protein) (TonE-binding protein) (TonEBP)	NFAT5
O94916	O94916_S561	-2.74333	0.164172	O94916	NFAT5_HUMAN	Nuclear factor of activated T-cells 5 (NF-AT5) (T-cell transcription factor NFAT5) (Tonicity-responsive enhancer-binding protein) (TonE-binding protein) (TonEBP)	NFAT5
O94921	O94921_S95	0.668577	NA	O94921	CDK14_HUMAN	Cyclin-dependent kinase 14 (EC 2.7.11.22) (Cell division protein kinase 14) (Serine/threonine-protein kinase PFTAIRE-1) (hPFTAIRE1)	CDK14
O94923	O94923_S44	-1.86784	0.299248	O94923	GLCE_HUMAN	D-glucuronyl C5-epimerase (EC 5.1.3.17) (Heparan sulfate C5-epimerase) (Hsepi) (Heparin/heparan sulfate:glucuronic acid C5-epimerase) (Heparosan-N-sulfate-glucuronate 5-epimerase)	GLCE
O94964	O94964_S1017	-3.00018	NA	O94964	SOGA1_HUMAN	Protein SOGA1 (SOGA family member 1) (Suppressor of glucose by autophagy) (Suppressor of glucose, autophagy-associated protein 1) [Cleaved into: N-terminal form; C-terminal 80 kDa form (80-kDa SOGA fragment)]	SOGA1
O94964	O94964_S1303	-1.84888	NA	O94964	SOGA1_HUMAN	Protein SOGA1 (SOGA family member 1) (Suppressor of glucose by autophagy) (Suppressor of glucose, autophagy-associated protein 1) [Cleaved into: N-terminal form; C-terminal 80 kDa form (80-kDa SOGA fragment)]	SOGA1
O94964	O94964_S928	NA	NA	O94964	SOGA1_HUMAN	Protein SOGA1 (SOGA family member 1) (Suppressor of glucose by autophagy) (Suppressor of glucose, autophagy-associated protein 1) [Cleaved into: N-terminal form; C-terminal 80 kDa form (80-kDa SOGA fragment)]	SOGA1
O94964	O94964_S929	-1.00586	NA	O94964	SOGA1_HUMAN	Protein SOGA1 (SOGA family member 1) (Suppressor of glucose by autophagy) (Suppressor of glucose, autophagy-associated protein 1) [Cleaved into: N-terminal form; C-terminal 80 kDa form (80-kDa SOGA fragment)]	SOGA1
O94964	O94964_T1305	NA	NA	O94964	SOGA1_HUMAN	Protein SOGA1 (SOGA family member 1) (Suppressor of glucose by autophagy) (Suppressor of glucose, autophagy-associated protein 1) [Cleaved into: N-terminal form; C-terminal 80 kDa form (80-kDa SOGA fragment)]	SOGA1
O94979	O94979_S1163	-1.72235	NA	O94979	SC31A_HUMAN	Protein transport protein Sec31A (ABP125) (ABP130) (SEC31-like protein 1) (SEC31-related protein A) (Web1-like protein)	SEC31A
O94979	O94979_S527	-3.33668	NA	O94979	SC31A_HUMAN	Protein transport protein Sec31A (ABP125) (ABP130) (SEC31-like protein 1) (SEC31-related protein A) (Web1-like protein)	SEC31A
O94979	O94979_S799	0.253172	0.257555	O94979	SC31A_HUMAN	Protein transport protein Sec31A (ABP125) (ABP130) (SEC31-like protein 1) (SEC31-related protein A) (Web1-like protein)	SEC31A
O94979	O94979_T1161	-2.55476	NA	O94979	SC31A_HUMAN	Protein transport protein Sec31A (ABP125) (ABP130) (SEC31-like protein 1) (SEC31-related protein A) (Web1-like protein)	SEC31A
O95071	O95071_S1549	1.46061	0.328564	O95071	UBR5_HUMAN	E3 ubiquitin-protein ligase UBR5 (EC 6.3.2.-) (E3 ubiquitin-protein ligase, HECT domain-containing 1) (Hyperplastic discs protein homolog) (hHYD) (Progestin-induced protein)	UBR5
O95071	O95071_S1990	-1.17803	NA	O95071	UBR5_HUMAN	E3 ubiquitin-protein ligase UBR5 (EC 6.3.2.-) (E3 ubiquitin-protein ligase, HECT domain-containing 1) (Hyperplastic discs protein homolog) (hHYD) (Progestin-induced protein)	UBR5
O95071	O95071_S2241	-1.47572	0.394498	O95071	UBR5_HUMAN	E3 ubiquitin-protein ligase UBR5 (EC 6.3.2.-) (E3 ubiquitin-protein ligase, HECT domain-containing 1) (Hyperplastic discs protein homolog) (hHYD) (Progestin-induced protein)	UBR5
O95071	O95071_S327	-1.11743	NA	O95071	UBR5_HUMAN	E3 ubiquitin-protein ligase UBR5 (EC 6.3.2.-) (E3 ubiquitin-protein ligase, HECT domain-containing 1) (Hyperplastic discs protein homolog) (hHYD) (Progestin-induced protein)	UBR5
O95071	O95071_T1757	-2.34578	NA	O95071	UBR5_HUMAN	E3 ubiquitin-protein ligase UBR5 (EC 6.3.2.-) (E3 ubiquitin-protein ligase, HECT domain-containing 1) (Hyperplastic discs protein homolog) (hHYD) (Progestin-induced protein)	UBR5
O95104	O95104_S1004	0.63072	NA	O95104	SFR15_HUMAN	Splicing factor, arginine/serine-rich 15 (CTD-binding SR-like protein RA4) (SR-related and CTD-associated factor 4)	SCAF4
O95104	O95104_S1037	NA	NA	O95104	SFR15_HUMAN	Splicing factor, arginine/serine-rich 15 (CTD-binding SR-like protein RA4) (SR-related and CTD-associated factor 4)	SCAF4
O95104	O95104_S1141	NA	NA	O95104	SFR15_HUMAN	Splicing factor, arginine/serine-rich 15 (CTD-binding SR-like protein RA4) (SR-related and CTD-associated factor 4)	SCAF4
O95104	O95104_S154	NA	NA	O95104	SFR15_HUMAN	Splicing factor, arginine/serine-rich 15 (CTD-binding SR-like protein RA4) (SR-related and CTD-associated factor 4)	SCAF4
O95104	O95104_T236	1.62629	NA	O95104	SFR15_HUMAN	Splicing factor, arginine/serine-rich 15 (CTD-binding SR-like protein RA4) (SR-related and CTD-associated factor 4)	SCAF4
O95155	O95155_S105	0.221679	0.332702	O95155	UBE4B_HUMAN	Ubiquitin conjugation factor E4 B (Homozygously deleted in neuroblastoma 1) (Ubiquitin fusion degradation protein 2)	UBE4B
O95155	O95155_S78	-3.85372	NA	O95155	UBE4B_HUMAN	Ubiquitin conjugation factor E4 B (Homozygously deleted in neuroblastoma 1) (Ubiquitin fusion degradation protein 2)	UBE4B
O95155	O95155_S83	-0.550954	NA	O95155	UBE4B_HUMAN	Ubiquitin conjugation factor E4 B (Homozygously deleted in neuroblastoma 1) (Ubiquitin fusion degradation protein 2)	UBE4B
O95155	O95155_S83,O95155_S84	-0.618213	NA	O95155	UBE4B_HUMAN	Ubiquitin conjugation factor E4 B (Homozygously deleted in neuroblastoma 1) (Ubiquitin fusion degradation protein 2)	UBE4B
O95208	O95208_S172	-0.577787	0.559656	O95208	EPN2_HUMAN	Epsin-2 (EPS-15-interacting protein 2)	EPN2
O95208	O95208_S173	-1.46865	NA	O95208	EPN2_HUMAN	Epsin-2 (EPS-15-interacting protein 2)	EPN2
O95208	O95208_S479	NA	NA	O95208	EPN2_HUMAN	Epsin-2 (EPS-15-interacting protein 2)	EPN2
O95208	O95208_T470	-0.602767	0.701812	O95208	EPN2_HUMAN	Epsin-2 (EPS-15-interacting protein 2)	EPN2
O95218	O95218_S120	0.474923	0.672155	O95218	ZRAB2_HUMAN	Zinc finger Ran-binding domain-containing protein 2 (Zinc finger protein 265) (Zinc finger, splicing)	ZRANB2
O95218	O95218_S153	-0.306293	NA	O95218	ZRAB2_HUMAN	Zinc finger Ran-binding domain-containing protein 2 (Zinc finger protein 265) (Zinc finger, splicing)	ZRANB2
O95218	O95218_S188	-0.666274	0.526351	O95218	ZRAB2_HUMAN	Zinc finger Ran-binding domain-containing protein 2 (Zinc finger protein 265) (Zinc finger, splicing)	ZRANB2
O95232	O95232_S431	0.502431	NA	O95232	LC7L3_HUMAN	Luc7-like protein 3 (Cisplatin resistance-associated-overexpressed protein) (Luc7A) (Okadaic acid-inducible phosphoprotein OA48-18) (cAMP regulatory element-associated protein 1) (CRE-associated protein 1) (CREAP-1)	LUC7L3
O95239	O95239_S801	-1.52073	0.504641	O95239	KIF4A_HUMAN	Chromosome-associated kinesin KIF4A (Chromokinesin-A)	KIF4A
O95239	O95239_T1181	-0.679744	0.710669	O95239	KIF4A_HUMAN	Chromosome-associated kinesin KIF4A (Chromokinesin-A)	KIF4A
O95239;Q2VIQ3	O95239_S1216,Q2VIQ3_S1218	-0.159545	NA	O95239;Q2VIQ3	KIF4A_HUMAN;KIF4B_HUMAN	Chromosome-associated kinesin KIF4A (Chromokinesin-A);Chromosome-associated kinesin KIF4B (Chromokinesin-B)	KIF4A;KIF4B
O95239;Q2VIQ3	O95239_S1225,Q2VIQ3_S1227	-2.50097	NA	O95239;Q2VIQ3	KIF4A_HUMAN;KIF4B_HUMAN	Chromosome-associated kinesin KIF4A (Chromokinesin-A);Chromosome-associated kinesin KIF4B (Chromokinesin-B)	KIF4A;KIF4B
O95243	O95243_S318	NA	NA	O95243	MBD4_HUMAN	Methyl-CpG-binding domain protein 4 (EC 3.2.2.-) (Methyl-CpG-binding endonuclease 1) (Methyl-CpG-binding protein MBD4) (Mismatch-specific DNA N-glycosylase)	MBD4
O95248	O95248_S1141	-1.82908	NA	O95248	MTMR5_HUMAN	Myotubularin-related protein 5 (SET-binding factor 1) (Sbf1)	SBF1
O95248	O95248_T1137	-1.82585	NA	O95248	MTMR5_HUMAN	Myotubularin-related protein 5 (SET-binding factor 1) (Sbf1)	SBF1
O95251	O95251_S99	-0.225232	0.777901	O95251	KAT7_HUMAN	Histone acetyltransferase KAT7 (EC 2.3.1.48) (Histone acetyltransferase binding to ORC1) (Lysine acetyltransferase 7) (MOZ, YBF2/SAS3, SAS2 and TIP60 protein 2) (MYST-2)	KAT7
O95251	O95251_S99,O95251_S100	1.04598	0.560309	O95251	KAT7_HUMAN	Histone acetyltransferase KAT7 (EC 2.3.1.48) (Histone acetyltransferase binding to ORC1) (Lysine acetyltransferase 7) (MOZ, YBF2/SAS3, SAS2 and TIP60 protein 2) (MYST-2)	KAT7
O95251	O95251_T88	0.787623	0.232488	O95251	KAT7_HUMAN	Histone acetyltransferase KAT7 (EC 2.3.1.48) (Histone acetyltransferase binding to ORC1) (Lysine acetyltransferase 7) (MOZ, YBF2/SAS3, SAS2 and TIP60 protein 2) (MYST-2)	KAT7
O95292	O95292_S158	-0.588878	0.636624	O95292	VAPB_HUMAN	Vesicle-associated membrane protein-associated protein B/C (VAMP-B/VAMP-C) (VAMP-associated protein B/C) (VAP-B/VAP-C)	VAPB
O95292	O95292_S159	3.61762	NA	O95292	VAPB_HUMAN	Vesicle-associated membrane protein-associated protein B/C (VAMP-B/VAMP-C) (VAMP-associated protein B/C) (VAP-B/VAP-C)	VAPB
O95292	O95292_S160	0.352202	0.4565	O95292	VAPB_HUMAN	Vesicle-associated membrane protein-associated protein B/C (VAMP-B/VAMP-C) (VAMP-associated protein B/C) (VAP-B/VAP-C)	VAPB
O95295	O95295_S133	-0.451287	0.732918	O95295	SNAPN_HUMAN	SNARE-associated protein Snapin (Biogenesis of lysosome-related organelles complex 1 subunit 7) (BLOC-1 subunit 7) (Synaptosomal-associated protein 25-binding protein) (SNAP-associated protein)	SNAPIN
O95295	O95295_T14	-1.24115	0.451649	O95295	SNAPN_HUMAN	SNARE-associated protein Snapin (Biogenesis of lysosome-related organelles complex 1 subunit 7) (BLOC-1 subunit 7) (Synaptosomal-associated protein 25-binding protein) (SNAP-associated protein)	SNAPIN
O95297	O95297_S210	-0.836268	0.0339088	O95297	MPZL1_HUMAN	Myelin protein zero-like protein 1 (Protein zero-related)	MPZL1
O95297	O95297_S221	0.722742	NA	O95297	MPZL1_HUMAN	Myelin protein zero-like protein 1 (Protein zero-related)	MPZL1
O95297	O95297_Y263	-0.950755	0.284373	O95297	MPZL1_HUMAN	Myelin protein zero-like protein 1 (Protein zero-related)	MPZL1
O95359	O95359_S2086	1.89936	NA	O95359	TACC2_HUMAN	Transforming acidic coiled-coil-containing protein 2 (Anti-Zuai-1) (AZU-1)	TACC2
O95359	O95359_S2226	1.0195	0.215839	O95359	TACC2_HUMAN	Transforming acidic coiled-coil-containing protein 2 (Anti-Zuai-1) (AZU-1)	TACC2
O95359	O95359_S2567	-4.18966	NA	O95359	TACC2_HUMAN	Transforming acidic coiled-coil-containing protein 2 (Anti-Zuai-1) (AZU-1)	TACC2
O95365	O95365_S525	-0.735918	NA	O95365	ZBT7A_HUMAN	Zinc finger and BTB domain-containing protein 7A (Factor binding IST protein 1) (FBI-1) (Factor that binds to inducer of short transcripts protein 1) (HIV-1 1st-binding protein 1) (Leukemia/lymphoma-related factor) (POZ and Krueppel erythroid myeloid ontogenic factor) (POK erythroid myeloid ontogenic factor) (Pokemon) (TTF-I-interacting peptide 21) (TIP21) (Zinc finger protein 857A)	ZBTB7A
O95365	O95365_S526	-2.27026	0.017303	O95365	ZBT7A_HUMAN	Zinc finger and BTB domain-containing protein 7A (Factor binding IST protein 1) (FBI-1) (Factor that binds to inducer of short transcripts protein 1) (HIV-1 1st-binding protein 1) (Leukemia/lymphoma-related factor) (POZ and Krueppel erythroid myeloid ontogenic factor) (POK erythroid myeloid ontogenic factor) (Pokemon) (TTF-I-interacting peptide 21) (TIP21) (Zinc finger protein 857A)	ZBTB7A
O95365	O95365_S549	-0.0819356	0.856064	O95365	ZBT7A_HUMAN	Zinc finger and BTB domain-containing protein 7A (Factor binding IST protein 1) (FBI-1) (Factor that binds to inducer of short transcripts protein 1) (HIV-1 1st-binding protein 1) (Leukemia/lymphoma-related factor) (POZ and Krueppel erythroid myeloid ontogenic factor) (POK erythroid myeloid ontogenic factor) (Pokemon) (TTF-I-interacting peptide 21) (TIP21) (Zinc finger protein 857A)	ZBTB7A
O95391	O95391_S215	1.221	NA	O95391	SLU7_HUMAN	Pre-mRNA-splicing factor SLU7 (hSlu7)	SLU7
O95394	O95394_S64	-2.06029	NA	O95394	AGM1_HUMAN	Phosphoacetylglucosamine mutase (PAGM) (EC 5.4.2.3) (Acetylglucosamine phosphomutase) (N-acetylglucosamine-phosphate mutase) (Phosphoglucomutase-3) (PGM 3)	PGM3
O95400	O95400_S194	2.7579	NA	O95400	CD2B2_HUMAN	CD2 antigen cytoplasmic tail-binding protein 2 (CD2 cytoplasmic domain-binding protein 2) (CD2 tail-binding protein 2)	CD2BP2
O95400	O95400_S195	-1.12531	0.268871	O95400	CD2B2_HUMAN	CD2 antigen cytoplasmic tail-binding protein 2 (CD2 cytoplasmic domain-binding protein 2) (CD2 tail-binding protein 2)	CD2BP2
O95402	O95402_S447	0.0157485	0.980255	O95402	MED26_HUMAN	Mediator of RNA polymerase II transcription subunit 26 (Activator-recruited cofactor 70 kDa component) (ARC70) (Cofactor required for Sp1 transcriptional activation subunit 7) (CRSP complex subunit 7) (Mediator complex subunit 26) (Transcriptional coactivator CRSP70)	MED26
O95402	O95402_S535	-1.98334	0.255171	O95402	MED26_HUMAN	Mediator of RNA polymerase II transcription subunit 26 (Activator-recruited cofactor 70 kDa component) (ARC70) (Cofactor required for Sp1 transcriptional activation subunit 7) (CRSP complex subunit 7) (Mediator complex subunit 26) (Transcriptional coactivator CRSP70)	MED26
O95402	O95402_S7	-0.0504148	0.799056	O95402	MED26_HUMAN	Mediator of RNA polymerase II transcription subunit 26 (Activator-recruited cofactor 70 kDa component) (ARC70) (Cofactor required for Sp1 transcriptional activation subunit 7) (CRSP complex subunit 7) (Mediator complex subunit 26) (Transcriptional coactivator CRSP70)	MED26
O95425	O95425_S968	3.37088	NA	O95425	SVIL_HUMAN	Supervillin (Archvillin) (p205/p250)	SVIL
O95429	O95429_S179	0.790521	0.663824	O95429	BAG4_HUMAN	BAG family molecular chaperone regulator 4 (BAG-4) (Bcl-2-associated athanogene 4) (Silencer of death domains)	BAG4
O95453	O95453_S583	-2.83073	NA	O95453	PARN_HUMAN	Poly(A)-specific ribonuclease PARN (EC 3.1.13.4) (Deadenylating nuclease) (Deadenylation nuclease) (Polyadenylate-specific ribonuclease)	PARN
O95453	O95453_S619	-0.162072	0.310397	O95453	PARN_HUMAN	Poly(A)-specific ribonuclease PARN (EC 3.1.13.4) (Deadenylating nuclease) (Deadenylation nuclease) (Polyadenylate-specific ribonuclease)	PARN
O95503	O95503_S272	NA	NA	O95503	CBX6_HUMAN	Chromobox protein homolog 6	CBX6
O95544	O95544_S46	0.358458	0.48031	O95544	NADK_HUMAN	NAD kinase (EC 2.7.1.23) (Poly(P)/ATP NAD kinase)	NADK
O95544	O95544_S48	-0.303569	0.610192	O95544	NADK_HUMAN	NAD kinase (EC 2.7.1.23) (Poly(P)/ATP NAD kinase)	NADK
O95544	O95544_S64	-0.154968	0.879124	O95544	NADK_HUMAN	NAD kinase (EC 2.7.1.23) (Poly(P)/ATP NAD kinase)	NADK
O95602	O95602_S1429	-0.262982	0.830267	O95602	RPA1_HUMAN	DNA-directed RNA polymerase I subunit RPA1 (RNA polymerase I subunit A1) (EC 2.7.7.6) (A190) (DNA-directed RNA polymerase I largest subunit) (DNA-directed RNA polymerase I subunit A) (RNA polymerase I 194 kDa subunit) (RPA194)	POLR1A
O95613	O95613_S44	-0.309482	0.644104	O95613	PCNT_HUMAN	Pericentrin (Kendrin) (Pericentrin-B)	PCNT
O95628	O95628_S430	-1.46263	NA	O95628	CNOT4_HUMAN	CCR4-NOT transcription complex subunit 4 (EC 6.3.2.-) (CCR4-associated factor 4) (E3 ubiquitin-protein ligase CNOT4) (Potential transcriptional repressor NOT4Hp)	CNOT4
O95639	O95639_S212	NA	NA	O95639	CPSF4_HUMAN	Cleavage and polyadenylation specificity factor subunit 4 (Cleavage and polyadenylation specificity factor 30 kDa subunit) (CPSF 30 kDa subunit) (NS1 effector domain-binding protein 1) (Neb-1) (No arches homolog)	CPSF4
O95671	O95671_S19	-1.37436	0.116129	O95671	ASML_HUMAN	N-acetylserotonin O-methyltransferase-like protein (ASMTL)	ASMTL
O95671	O95671_S239	NA	NA	O95671	ASML_HUMAN	N-acetylserotonin O-methyltransferase-like protein (ASMTL)	ASMTL
O95674	O95674_S21	-0.873134	0.315142	O95674	CDS2_HUMAN	Phosphatidate cytidylyltransferase 2 (EC 2.7.7.41) (CDP-DAG synthase 2) (CDP-DG synthase 2) (CDP-diacylglycerol synthase 2) (CDS 2) (CDP-diglyceride pyrophosphorylase 2) (CDP-diglyceride synthase 2) (CTP:phosphatidate cytidylyltransferase 2)	CDS2
O95674	O95674_S21,O95674_S33	NA	NA	O95674	CDS2_HUMAN	Phosphatidate cytidylyltransferase 2 (EC 2.7.7.41) (CDP-DAG synthase 2) (CDP-DG synthase 2) (CDP-diacylglycerol synthase 2) (CDS 2) (CDP-diglyceride pyrophosphorylase 2) (CDP-diglyceride synthase 2) (CTP:phosphatidate cytidylyltransferase 2)	CDS2
O95674	O95674_S23	-2.40278	NA	O95674	CDS2_HUMAN	Phosphatidate cytidylyltransferase 2 (EC 2.7.7.41) (CDP-DAG synthase 2) (CDP-DG synthase 2) (CDP-diacylglycerol synthase 2) (CDS 2) (CDP-diglyceride pyrophosphorylase 2) (CDP-diglyceride synthase 2) (CTP:phosphatidate cytidylyltransferase 2)	CDS2
O95674	O95674_S33	0.288493	0.815119	O95674	CDS2_HUMAN	Phosphatidate cytidylyltransferase 2 (EC 2.7.7.41) (CDP-DAG synthase 2) (CDP-DG synthase 2) (CDP-diacylglycerol synthase 2) (CDS 2) (CDP-diglyceride pyrophosphorylase 2) (CDP-diglyceride synthase 2) (CTP:phosphatidate cytidylyltransferase 2)	CDS2
O95684	O95684_S156,O95684_S160	NA	NA	O95684	FR1OP_HUMAN	FGFR1 oncogene partner	FGFR1OP
O95684	O95684_S160	-2.33997	0.341264	O95684	FR1OP_HUMAN	FGFR1 oncogene partner	FGFR1OP
O95684	O95684_T169	0.208823	NA	O95684	FR1OP_HUMAN	FGFR1 oncogene partner	FGFR1OP
O95684	O95684_T170	-0.3206	0.108515	O95684	FR1OP_HUMAN	FGFR1 oncogene partner	FGFR1OP
O95685	O95685_S46	NA	NA	O95685	PPR3D_HUMAN	Protein phosphatase 1 regulatory subunit 3D (Protein phosphatase 1 regulatory subunit 6) (PP1 subunit R6) (Protein phosphatase 1-binding subunit R6)	PPP1R3D
O95685	O95685_S74,O95685_S78	0.408679	NA	O95685	PPR3D_HUMAN	Protein phosphatase 1 regulatory subunit 3D (Protein phosphatase 1 regulatory subunit 6) (PP1 subunit R6) (Protein phosphatase 1-binding subunit R6)	PPP1R3D
O95757	O95757_S579	-0.475843	NA	O95757	HS74L_HUMAN	Heat shock 70 kDa protein 4L (Heat shock 70-related protein APG-1) (Osmotic stress protein 94)	HSPA4L
O95758	O95758_S56	1.23906	NA	O95758	PTBP3_HUMAN	Polypyrimidine tract-binding protein 3 (Regulator of differentiation 1) (Rod1)	PTBP3
O95772	O95772_S39	0.332871	NA	O95772	MENTO_HUMAN	MLN64 N-terminal domain homolog (STARD3 N-terminal-like protein)	STARD3NL
O95785	O95785_S1006,O95785_S1017	-0.955045	NA	O95785	WIZ_HUMAN	Protein Wiz (Widely-interspaced zinc finger-containing protein) (Zinc finger protein 803)	WIZ
O95785	O95785_S1012	-2.09757	NA	O95785	WIZ_HUMAN	Protein Wiz (Widely-interspaced zinc finger-containing protein) (Zinc finger protein 803)	WIZ
O95785	O95785_S1012,O95785_S1017	-1.26681	0.551836	O95785	WIZ_HUMAN	Protein Wiz (Widely-interspaced zinc finger-containing protein) (Zinc finger protein 803)	WIZ
O95785	O95785_S1017	-0.607084	0.584134	O95785	WIZ_HUMAN	Protein Wiz (Widely-interspaced zinc finger-containing protein) (Zinc finger protein 803)	WIZ
O95785	O95785_S1106	NA	NA	O95785	WIZ_HUMAN	Protein Wiz (Widely-interspaced zinc finger-containing protein) (Zinc finger protein 803)	WIZ
O95785	O95785_S1127	-0.829182	0.555714	O95785	WIZ_HUMAN	Protein Wiz (Widely-interspaced zinc finger-containing protein) (Zinc finger protein 803)	WIZ
O95785	O95785_S1129,O95785_S1134	-0.0115553	NA	O95785	WIZ_HUMAN	Protein Wiz (Widely-interspaced zinc finger-containing protein) (Zinc finger protein 803)	WIZ
O95785	O95785_S1146	0.739444	0.710924	O95785	WIZ_HUMAN	Protein Wiz (Widely-interspaced zinc finger-containing protein) (Zinc finger protein 803)	WIZ
O95785	O95785_S996	-0.411886	NA	O95785	WIZ_HUMAN	Protein Wiz (Widely-interspaced zinc finger-containing protein) (Zinc finger protein 803)	WIZ
O95793	O95793_S176	0.634328	NA	O95793	STAU1_HUMAN	Double-stranded RNA-binding protein Staufen homolog 1	STAU1
O95793	O95793_S390	NA	NA	O95793	STAU1_HUMAN	Double-stranded RNA-binding protein Staufen homolog 1	STAU1
O95793	O95793_T277	-0.0602002	NA	O95793	STAU1_HUMAN	Double-stranded RNA-binding protein Staufen homolog 1	STAU1
O95817	O95817_S173	-0.541143	0.335967	O95817	BAG3_HUMAN	BAG family molecular chaperone regulator 3 (BAG-3) (Bcl-2-associated athanogene 3) (Bcl-2-binding protein Bis) (Docking protein CAIR-1)	BAG3
O95817	O95817_S194	-2.42154	NA	O95817	BAG3_HUMAN	BAG family molecular chaperone regulator 3 (BAG-3) (Bcl-2-associated athanogene 3) (Bcl-2-binding protein Bis) (Docking protein CAIR-1)	BAG3
O95817	O95817_S377	-0.940224	0.602969	O95817	BAG3_HUMAN	BAG family molecular chaperone regulator 3 (BAG-3) (Bcl-2-associated athanogene 3) (Bcl-2-binding protein Bis) (Docking protein CAIR-1)	BAG3
O95817	O95817_S377,O95817_S385	-3.83302	NA	O95817	BAG3_HUMAN	BAG family molecular chaperone regulator 3 (BAG-3) (Bcl-2-associated athanogene 3) (Bcl-2-binding protein Bis) (Docking protein CAIR-1)	BAG3
O95817	O95817_S386	NA	NA	O95817	BAG3_HUMAN	BAG family molecular chaperone regulator 3 (BAG-3) (Bcl-2-associated athanogene 3) (Bcl-2-binding protein Bis) (Docking protein CAIR-1)	BAG3
O95819	O95819_S629	-0.225218	NA	O95819	M4K4_HUMAN	Mitogen-activated protein kinase kinase kinase kinase 4 (EC 2.7.11.1) (HPK/GCK-like kinase HGK) (MAPK/ERK kinase kinase kinase 4) (MEK kinase kinase 4) (MEKKK 4) (Nck-interacting kinase)	MAP4K4
O95819	O95819_S629,O95819_S631	NA	NA	O95819	M4K4_HUMAN	Mitogen-activated protein kinase kinase kinase kinase 4 (EC 2.7.11.1) (HPK/GCK-like kinase HGK) (MAPK/ERK kinase kinase kinase 4) (MEK kinase kinase 4) (MEKKK 4) (Nck-interacting kinase)	MAP4K4
O95819	O95819_S631	2.87219	0.522626	O95819	M4K4_HUMAN	Mitogen-activated protein kinase kinase kinase kinase 4 (EC 2.7.11.1) (HPK/GCK-like kinase HGK) (MAPK/ERK kinase kinase kinase 4) (MEK kinase kinase 4) (MEKKK 4) (Nck-interacting kinase)	MAP4K4
O95819	O95819_S635	1.77618	NA	O95819	M4K4_HUMAN	Mitogen-activated protein kinase kinase kinase kinase 4 (EC 2.7.11.1) (HPK/GCK-like kinase HGK) (MAPK/ERK kinase kinase kinase 4) (MEK kinase kinase 4) (MEKKK 4) (Nck-interacting kinase)	MAP4K4
O95819	O95819_S639	1.32394	0.495258	O95819	M4K4_HUMAN	Mitogen-activated protein kinase kinase kinase kinase 4 (EC 2.7.11.1) (HPK/GCK-like kinase HGK) (MAPK/ERK kinase kinase kinase 4) (MEK kinase kinase 4) (MEKKK 4) (Nck-interacting kinase)	MAP4K4
O95819	O95819_S805	NA	NA	O95819	M4K4_HUMAN	Mitogen-activated protein kinase kinase kinase kinase 4 (EC 2.7.11.1) (HPK/GCK-like kinase HGK) (MAPK/ERK kinase kinase kinase 4) (MEK kinase kinase 4) (MEKKK 4) (Nck-interacting kinase)	MAP4K4
O95819	O95819_T628,O95819_S631	0.913523	0.550767	O95819	M4K4_HUMAN	Mitogen-activated protein kinase kinase kinase kinase 4 (EC 2.7.11.1) (HPK/GCK-like kinase HGK) (MAPK/ERK kinase kinase kinase 4) (MEK kinase kinase 4) (MEKKK 4) (Nck-interacting kinase)	MAP4K4
O95831	O95831_S268	-0.12369	0.755102	O95831	AIFM1_HUMAN	Apoptosis-inducing factor 1, mitochondrial (EC 1.-.-.-) (Programmed cell death protein 8)	AIFM1
O95835	O95835_S464	-1.2698	0.00364068	O95835	LATS1_HUMAN	Serine/threonine-protein kinase LATS1 (EC 2.7.11.1) (Large tumor suppressor homolog 1) (WARTS protein kinase) (h-warts)	LATS1
O95835	O95835_S613	-0.480728	0.258759	O95835	LATS1_HUMAN	Serine/threonine-protein kinase LATS1 (EC 2.7.11.1) (Large tumor suppressor homolog 1) (WARTS protein kinase) (h-warts)	LATS1
O95835	O95835_T246	NA	NA	O95835	LATS1_HUMAN	Serine/threonine-protein kinase LATS1 (EC 2.7.11.1) (Large tumor suppressor homolog 1) (WARTS protein kinase) (h-warts)	LATS1
O95835	O95835_T612	-1.93194	NA	O95835	LATS1_HUMAN	Serine/threonine-protein kinase LATS1 (EC 2.7.11.1) (Large tumor suppressor homolog 1) (WARTS protein kinase) (h-warts)	LATS1
O95983	O95983_S85	NA	NA	O95983	MBD3_HUMAN	Methyl-CpG-binding domain protein 3 (Methyl-CpG-binding protein MBD3)	MBD3
O95999	O95999_S134	-0.919064	0.0706466	O95999	BCL10_HUMAN	B-cell lymphoma/leukemia 10 (B-cell CLL/lymphoma 10) (Bcl-10) (CARD-containing molecule enhancing NF-kappa-B) (CARD-like apoptotic protein) (hCLAP) (CED-3/ICH-1 prodomain homologous E10-like regulator) (CIPER) (Cellular homolog of vCARMEN) (cCARMEN) (Cellular-E10) (c-E10) (Mammalian CARD-containing adapter molecule E10) (mE10)	BCL10
O95999	O95999_S138	1.28609	0.219948	O95999	BCL10_HUMAN	B-cell lymphoma/leukemia 10 (B-cell CLL/lymphoma 10) (Bcl-10) (CARD-containing molecule enhancing NF-kappa-B) (CARD-like apoptotic protein) (hCLAP) (CED-3/ICH-1 prodomain homologous E10-like regulator) (CIPER) (Cellular homolog of vCARMEN) (cCARMEN) (Cellular-E10) (c-E10) (Mammalian CARD-containing adapter molecule E10) (mE10)	BCL10
O96013	O96013_S104	0.942227	0.584178	O96013	PAK4_HUMAN	Serine/threonine-protein kinase PAK 4 (EC 2.7.11.1) (p21-activated kinase 4) (PAK-4)	PAK4
O96013	O96013_S181	-1.31634	0.377545	O96013	PAK4_HUMAN	Serine/threonine-protein kinase PAK 4 (EC 2.7.11.1) (p21-activated kinase 4) (PAK-4)	PAK4
O96013	O96013_S291	-0.52514	NA	O96013	PAK4_HUMAN	Serine/threonine-protein kinase PAK 4 (EC 2.7.11.1) (p21-activated kinase 4) (PAK-4)	PAK4
O96013	O96013_T207	-1.96939	0.0912303	O96013	PAK4_HUMAN	Serine/threonine-protein kinase PAK 4 (EC 2.7.11.1) (p21-activated kinase 4) (PAK-4)	PAK4
O96019	O96019_S233	0.702288	0.160305	O96019	ACL6A_HUMAN	Actin-like protein 6A (53 kDa BRG1-associated factor A) (Actin-related protein Baf53a) (ArpNbeta) (BRG1-associated factor 53A) (BAF53A) (INO80 complex subunit K)	ACTL6A
O96028	O96028_S172	NA	NA	O96028	NSD2_HUMAN	Histone-lysine N-methyltransferase NSD2 (EC 2.1.1.43) (Multiple myeloma SET domain-containing protein) (MMSET) (Nuclear SET domain-containing protein 2) (NSD2) (Protein trithorax-5) (Wolf-Hirschhorn syndrome candidate 1 protein) (WHSC1)	WHSC1
O96028	O96028_S177	-1.53762	0.53304	O96028	NSD2_HUMAN	Histone-lysine N-methyltransferase NSD2 (EC 2.1.1.43) (Multiple myeloma SET domain-containing protein) (MMSET) (Nuclear SET domain-containing protein 2) (NSD2) (Protein trithorax-5) (Wolf-Hirschhorn syndrome candidate 1 protein) (WHSC1)	WHSC1
O96028	O96028_S437	1.47022	NA	O96028	NSD2_HUMAN	Histone-lysine N-methyltransferase NSD2 (EC 2.1.1.43) (Multiple myeloma SET domain-containing protein) (MMSET) (Nuclear SET domain-containing protein 2) (NSD2) (Protein trithorax-5) (Wolf-Hirschhorn syndrome candidate 1 protein) (WHSC1)	WHSC1
P00492	P00492_S5	NA	NA	P00492	HPRT_HUMAN	Hypoxanthine-guanine phosphoribosyltransferase (HGPRT) (HGPRTase) (EC 2.4.2.8)	HPRT1
P00519	P00519_S718	0.878912	0.5376	P00519	ABL1_HUMAN	Tyrosine-protein kinase ABL1 (EC 2.7.10.2) (Abelson murine leukemia viral oncogene homolog 1) (Abelson tyrosine-protein kinase 1) (Proto-oncogene c-Abl) (p150)	ABL1
P00533	P00533_S1166	-1.27806	NA	P00533	EGFR_HUMAN	Epidermal growth factor receptor (EC 2.7.10.1) (Proto-oncogene c-ErbB-1) (Receptor tyrosine-protein kinase erbB-1)	EGFR
P00533	P00533_T693	NA	NA	P00533	EGFR_HUMAN	Epidermal growth factor receptor (EC 2.7.10.1) (Proto-oncogene c-ErbB-1) (Receptor tyrosine-protein kinase erbB-1)	EGFR
P00558	P00558_S203	-1.78618	0.459967	P00558	PGK1_HUMAN	Phosphoglycerate kinase 1 (EC 2.7.2.3) (Cell migration-inducing gene 10 protein) (Primer recognition protein 2) (PRP 2)	PGK1
P01106	P01106_S281,P01106_S288	0.271596	NA	P01106	MYC_HUMAN	Myc proto-oncogene protein (Class E basic helix-loop-helix protein 39) (bHLHe39) (Proto-oncogene c-Myc) (Transcription factor p64)	MYC
P01303	P01303_S82	1.30891	NA	P01303	NPY_HUMAN	Pro-neuropeptide Y [Cleaved into: Neuropeptide Y (Neuropeptide tyrosine) (NPY); C-flanking peptide of NPY (CPON)]	NPY
P02545	P02545_S22	0.412581	0.604013	P02545	LMNA_HUMAN	Prelamin-A/C [Cleaved into: Lamin-A/C (70 kDa lamin) (Renal carcinoma antigen NY-REN-32)]	LMNA
P02545	P02545_S277	3.77014	NA	P02545	LMNA_HUMAN	Prelamin-A/C [Cleaved into: Lamin-A/C (70 kDa lamin) (Renal carcinoma antigen NY-REN-32)]	LMNA
P02545	P02545_S303	-1.34676	NA	P02545	LMNA_HUMAN	Prelamin-A/C [Cleaved into: Lamin-A/C (70 kDa lamin) (Renal carcinoma antigen NY-REN-32)]	LMNA
P02545	P02545_S390	NA	NA	P02545	LMNA_HUMAN	Prelamin-A/C [Cleaved into: Lamin-A/C (70 kDa lamin) (Renal carcinoma antigen NY-REN-32)]	LMNA
P02545	P02545_S390,P02545_S392	-0.189402	NA	P02545	LMNA_HUMAN	Prelamin-A/C [Cleaved into: Lamin-A/C (70 kDa lamin) (Renal carcinoma antigen NY-REN-32)]	LMNA
P02545	P02545_S392	0.427053	0.539072	P02545	LMNA_HUMAN	Prelamin-A/C [Cleaved into: Lamin-A/C (70 kDa lamin) (Renal carcinoma antigen NY-REN-32)]	LMNA
P02545	P02545_S403	0.0921634	0.971408	P02545	LMNA_HUMAN	Prelamin-A/C [Cleaved into: Lamin-A/C (70 kDa lamin) (Renal carcinoma antigen NY-REN-32)]	LMNA
P02545	P02545_S404	NA	NA	P02545	LMNA_HUMAN	Prelamin-A/C [Cleaved into: Lamin-A/C (70 kDa lamin) (Renal carcinoma antigen NY-REN-32)]	LMNA
P02545	P02545_S429	2.37571	NA	P02545	LMNA_HUMAN	Prelamin-A/C [Cleaved into: Lamin-A/C (70 kDa lamin) (Renal carcinoma antigen NY-REN-32)]	LMNA
P02545	P02545_S632	0.865836	NA	P02545	LMNA_HUMAN	Prelamin-A/C [Cleaved into: Lamin-A/C (70 kDa lamin) (Renal carcinoma antigen NY-REN-32)]	LMNA
P02545	P02545_S636	1.09335	NA	P02545	LMNA_HUMAN	Prelamin-A/C [Cleaved into: Lamin-A/C (70 kDa lamin) (Renal carcinoma antigen NY-REN-32)]	LMNA
P02794	P02794_S179	-0.990773	0.110782	P02794	FRIH_HUMAN	Ferritin heavy chain (Ferritin H subunit) (EC 1.16.3.1) (Cell proliferation-inducing gene 15 protein)	FTH1
P02794	P02794_T175	-2.32003	NA	P02794	FRIH_HUMAN	Ferritin heavy chain (Ferritin H subunit) (EC 1.16.3.1) (Cell proliferation-inducing gene 15 protein)	FTH1
P04049	P04049_S257	-0.806977	NA	P04049	RAF1_HUMAN	RAF proto-oncogene serine/threonine-protein kinase (EC 2.7.11.1) (Proto-oncogene c-RAF) (cRaf) (Raf-1)	RAF1
P04049	P04049_S259	-0.00962608	0.994025	P04049	RAF1_HUMAN	RAF proto-oncogene serine/threonine-protein kinase (EC 2.7.11.1) (Proto-oncogene c-RAF) (cRaf) (Raf-1)	RAF1
P04049	P04049_S289,P04049_S294	-0.106325	0.894446	P04049	RAF1_HUMAN	RAF proto-oncogene serine/threonine-protein kinase (EC 2.7.11.1) (Proto-oncogene c-RAF) (cRaf) (Raf-1)	RAF1
P04049	P04049_S295	NA	NA	P04049	RAF1_HUMAN	RAF proto-oncogene serine/threonine-protein kinase (EC 2.7.11.1) (Proto-oncogene c-RAF) (cRaf) (Raf-1)	RAF1
P04049	P04049_S296,P04049_S301	1.23941	NA	P04049	RAF1_HUMAN	RAF proto-oncogene serine/threonine-protein kinase (EC 2.7.11.1) (Proto-oncogene c-RAF) (cRaf) (Raf-1)	RAF1
P04049	P04049_S301	-0.470951	NA	P04049	RAF1_HUMAN	RAF proto-oncogene serine/threonine-protein kinase (EC 2.7.11.1) (Proto-oncogene c-RAF) (cRaf) (Raf-1)	RAF1
P04049	P04049_S43	1.17867	0.376165	P04049	RAF1_HUMAN	RAF proto-oncogene serine/threonine-protein kinase (EC 2.7.11.1) (Proto-oncogene c-RAF) (cRaf) (Raf-1)	RAF1
P04049	P04049_S642	-1.26533	0.435483	P04049	RAF1_HUMAN	RAF proto-oncogene serine/threonine-protein kinase (EC 2.7.11.1) (Proto-oncogene c-RAF) (cRaf) (Raf-1)	RAF1
P04049	P04049_T641	-0.467368	0.734694	P04049	RAF1_HUMAN	RAF proto-oncogene serine/threonine-protein kinase (EC 2.7.11.1) (Proto-oncogene c-RAF) (cRaf) (Raf-1)	RAF1
P04049;P10398	P04049_S621,P10398_S582	0.559194	0.629952	P04049;P10398	RAF1_HUMAN;ARAF_HUMAN	RAF proto-oncogene serine/threonine-protein kinase (EC 2.7.11.1) (Proto-oncogene c-RAF) (cRaf) (Raf-1);Serine/threonine-protein kinase A-Raf (EC 2.7.11.1) (Proto-oncogene A-Raf) (Proto-oncogene A-Raf-1) (Proto-oncogene Pks)	RAF1;ARAF
P04075	P04075_S36	-0.0934556	NA	P04075	ALDOA_HUMAN	Fructose-bisphosphate aldolase A (EC 4.1.2.13) (Lung cancer antigen NY-LU-1) (Muscle-type aldolase)	ALDOA
P04075	P04075_S39	-1.93809	NA	P04075	ALDOA_HUMAN	Fructose-bisphosphate aldolase A (EC 4.1.2.13) (Lung cancer antigen NY-LU-1) (Muscle-type aldolase)	ALDOA
P04075	P04075_T9	-2.0436	0.0760234	P04075	ALDOA_HUMAN	Fructose-bisphosphate aldolase A (EC 4.1.2.13) (Lung cancer antigen NY-LU-1) (Muscle-type aldolase)	ALDOA
P04150	P04150_S134	0.740005	0.432011	P04150	GCR_HUMAN	Glucocorticoid receptor (GR) (Nuclear receptor subfamily 3 group C member 1)	NR3C1
P04183	P04183_S13	-2.11757	0.367775	P04183	KITH_HUMAN	Thymidine kinase, cytosolic (EC 2.7.1.21)	TK1
P04183	P04183_S231	1.69177	NA	P04183	KITH_HUMAN	Thymidine kinase, cytosolic (EC 2.7.1.21)	TK1
P04626	P04626_S1054	-1.27363	0.553702	P04626	ERBB2_HUMAN	Receptor tyrosine-protein kinase erbB-2 (EC 2.7.10.1) (Metastatic lymph node gene 19 protein) (MLN 19) (Proto-oncogene Neu) (Proto-oncogene c-ErbB-2) (Tyrosine kinase-type cell surface receptor HER2) (p185erbB2) (CD antigen CD340)	ERBB2
P04626	P04626_S1174	-1.3303	0.0589492	P04626	ERBB2_HUMAN	Receptor tyrosine-protein kinase erbB-2 (EC 2.7.10.1) (Metastatic lymph node gene 19 protein) (MLN 19) (Proto-oncogene Neu) (Proto-oncogene c-ErbB-2) (Tyrosine kinase-type cell surface receptor HER2) (p185erbB2) (CD antigen CD340)	ERBB2
P04637	P04637_S315	0.450689	0.696456	P04637	P53_HUMAN	Cellular tumor antigen p53 (Antigen NY-CO-13) (Phosphoprotein p53) (Tumor suppressor p53)	TP53
P04637	P04637_S392	1.63565	0.590669	P04637	P53_HUMAN	Cellular tumor antigen p53 (Antigen NY-CO-13) (Phosphoprotein p53) (Tumor suppressor p53)	TP53
P04792	P04792_S82	-0.758821	0.164863	P04792	HSPB1_HUMAN	Heat shock protein beta-1 (HspB1) (28 kDa heat shock protein) (Estrogen-regulated 24 kDa protein) (Heat shock 27 kDa protein) (HSP 27) (Stress-responsive protein 27) (SRP27)	HSPB1
P04920	P04920_S113	-0.615636	0.323388	P04920	B3A2_HUMAN	Anion exchange protein 2 (AE 2) (Anion exchanger 2) (Non-erythroid band 3-like protein) (BND3L) (Solute carrier family 4 member 2)	SLC4A2
P04920	P04920_S132	-0.0786989	NA	P04920	B3A2_HUMAN	Anion exchange protein 2 (AE 2) (Anion exchanger 2) (Non-erythroid band 3-like protein) (BND3L) (Solute carrier family 4 member 2)	SLC4A2
P04920	P04920_S172	-1.47417	NA	P04920	B3A2_HUMAN	Anion exchange protein 2 (AE 2) (Anion exchanger 2) (Non-erythroid band 3-like protein) (BND3L) (Solute carrier family 4 member 2)	SLC4A2
P04920	P04920_T141	-0.470623	0.470914	P04920	B3A2_HUMAN	Anion exchange protein 2 (AE 2) (Anion exchanger 2) (Non-erythroid band 3-like protein) (BND3L) (Solute carrier family 4 member 2)	SLC4A2
P04920	P04920_T169	-0.842189	0.13257	P04920	B3A2_HUMAN	Anion exchange protein 2 (AE 2) (Anion exchanger 2) (Non-erythroid band 3-like protein) (BND3L) (Solute carrier family 4 member 2)	SLC4A2
P05114	P05114_S7	2.28312	NA	P05114	HMGN1_HUMAN	Non-histone chromosomal protein HMG-14 (High mobility group nucleosome-binding domain-containing protein 1)	HMGN1
P05114	P05114_S8	0.677305	NA	P05114	HMGN1_HUMAN	Non-histone chromosomal protein HMG-14 (High mobility group nucleosome-binding domain-containing protein 1)	HMGN1
P05114	P05114_S89	2.07157	NA	P05114	HMGN1_HUMAN	Non-histone chromosomal protein HMG-14 (High mobility group nucleosome-binding domain-containing protein 1)	HMGN1
P05387	P05387_S16	-1.72986	NA	P05387	RLA2_HUMAN	60S acidic ribosomal protein P2 (Renal carcinoma antigen NY-REN-44)	RPLP2
P05412;P17535	P05412_S73,P17535_S100	0.514085	0.371827	P05412;P17535	JUN_HUMAN;JUND_HUMAN	Transcription factor AP-1 (Activator protein 1) (AP1) (Proto-oncogene c-Jun) (V-jun avian sarcoma virus 17 oncogene homolog) (p39);Transcription factor jun-D	JUN;JUND
P05455	P05455_S366	-0.0731132	0.869995	P05455	LA_HUMAN	Lupus La protein (La autoantigen) (La ribonucleoprotein) (Sjoegren syndrome type B antigen) (SS-B)	SSB
P05455	P05455_S92	-0.321538	0.7394	P05455	LA_HUMAN	Lupus La protein (La autoantigen) (La ribonucleoprotein) (Sjoegren syndrome type B antigen) (SS-B)	SSB
P05783	P05783_S15	NA	NA	P05783	K1C18_HUMAN	Keratin, type I cytoskeletal 18 (Cell proliferation-inducing gene 46 protein) (Cytokeratin-18) (CK-18) (Keratin-18) (K18)	KRT18
P05783	P05783_S49	-2.77936	NA	P05783	K1C18_HUMAN	Keratin, type I cytoskeletal 18 (Cell proliferation-inducing gene 46 protein) (Cytokeratin-18) (CK-18) (Keratin-18) (K18)	KRT18
P05783	P05783_S51	-6.40509	NA	P05783	K1C18_HUMAN	Keratin, type I cytoskeletal 18 (Cell proliferation-inducing gene 46 protein) (Cytokeratin-18) (CK-18) (Keratin-18) (K18)	KRT18
P05783	P05783_S60	NA	NA	P05783	K1C18_HUMAN	Keratin, type I cytoskeletal 18 (Cell proliferation-inducing gene 46 protein) (Cytokeratin-18) (CK-18) (Keratin-18) (K18)	KRT18
P06454	P06454_S2	-0.153324	0.958815	P06454	PTMA_HUMAN	Prothymosin alpha [Cleaved into: Thymosin alpha-1]	PTMA
P06454	P06454_S9	0.190952	0.791067	P06454	PTMA_HUMAN	Prothymosin alpha [Cleaved into: Thymosin alpha-1]	PTMA
P06454	P06454_T8	0.816887	NA	P06454	PTMA_HUMAN	Prothymosin alpha [Cleaved into: Thymosin alpha-1]	PTMA
P06493	P06493_T14,P06493_Y15	-0.223399	0.703423	P06493	CDK1_HUMAN	Cyclin-dependent kinase 1 (CDK1) (EC 2.7.11.22) (EC 2.7.11.23) (Cell division control protein 2 homolog) (Cell division protein kinase 1) (p34 protein kinase)	CDK1
P06493	P06493_Y15	-0.804978	0.11024	P06493	CDK1_HUMAN	Cyclin-dependent kinase 1 (CDK1) (EC 2.7.11.22) (EC 2.7.11.23) (Cell division control protein 2 homolog) (Cell division protein kinase 1) (p34 protein kinase)	CDK1
P06493;P24941;Q00526	P06493_T14,P06493_Y15,P24941_T14,P24941_Y15,Q00526_T14,Q00526_Y15	0.619134	0.534374	P06493;P24941;Q00526	CDK1_HUMAN;CDK2_HUMAN;CDK3_HUMAN	Cyclin-dependent kinase 1 (CDK1) (EC 2.7.11.22) (EC 2.7.11.23) (Cell division control protein 2 homolog) (Cell division protein kinase 1) (p34 protein kinase);Cyclin-dependent kinase 2 (EC 2.7.11.22) (Cell division protein kinase 2) (p33 protein kinase);Cyclin-dependent kinase 3 (EC 2.7.11.22) (Cell division protein kinase 3)	CDK1;CDK2;CDK3
P06493;P24941;Q00526	P06493_Y15,P24941_Y15,Q00526_Y15	-0.763272	0.255178	P06493;P24941;Q00526	CDK1_HUMAN;CDK2_HUMAN;CDK3_HUMAN	Cyclin-dependent kinase 1 (CDK1) (EC 2.7.11.22) (EC 2.7.11.23) (Cell division control protein 2 homolog) (Cell division protein kinase 1) (p34 protein kinase);Cyclin-dependent kinase 2 (EC 2.7.11.22) (Cell division protein kinase 2) (p33 protein kinase);Cyclin-dependent kinase 3 (EC 2.7.11.22) (Cell division protein kinase 3)	CDK1;CDK2;CDK3
P06576	P06576_S353	-1.74227	0.323101	P06576	ATPB_HUMAN	ATP synthase subunit beta, mitochondrial (EC 3.6.3.14)	ATP5B
P06730	P06730_S209	NA	NA	P06730	IF4E_HUMAN	Eukaryotic translation initiation factor 4E (eIF-4E) (eIF4E) (eIF-4F 25 kDa subunit) (mRNA cap-binding protein)	EIF4E
P06730	P06730_T210	0.823537	NA	P06730	IF4E_HUMAN	Eukaryotic translation initiation factor 4E (eIF-4E) (eIF4E) (eIF-4F 25 kDa subunit) (mRNA cap-binding protein)	EIF4E
P06748	P06748_S125	-0.628	0.403713	P06748	NPM_HUMAN	Nucleophosmin (NPM) (Nucleolar phosphoprotein B23) (Nucleolar protein NO38) (Numatrin)	NPM1
P06748	P06748_S137	-0.512779	0.660181	P06748	NPM_HUMAN	Nucleophosmin (NPM) (Nucleolar phosphoprotein B23) (Nucleolar protein NO38) (Numatrin)	NPM1
P06748	P06748_S227	1.86303	NA	P06748	NPM_HUMAN	Nucleophosmin (NPM) (Nucleolar phosphoprotein B23) (Nucleolar protein NO38) (Numatrin)	NPM1
P06748	P06748_S242	0.925061	0.0597586	P06748	NPM_HUMAN	Nucleophosmin (NPM) (Nucleolar phosphoprotein B23) (Nucleolar protein NO38) (Numatrin)	NPM1
P06748	P06748_S243	0.611538	0.191764	P06748	NPM_HUMAN	Nucleophosmin (NPM) (Nucleolar phosphoprotein B23) (Nucleolar protein NO38) (Numatrin)	NPM1
P06748	P06748_S254	0.835065	0.179845	P06748	NPM_HUMAN	Nucleophosmin (NPM) (Nucleolar phosphoprotein B23) (Nucleolar protein NO38) (Numatrin)	NPM1
P06748	P06748_S70	0.244168	NA	P06748	NPM_HUMAN	Nucleophosmin (NPM) (Nucleolar phosphoprotein B23) (Nucleolar protein NO38) (Numatrin)	NPM1
P06748	P06748_T199	2.11716	0.256666	P06748	NPM_HUMAN	Nucleophosmin (NPM) (Nucleolar phosphoprotein B23) (Nucleolar protein NO38) (Numatrin)	NPM1
P07199	P07199_S156	-1.8309	NA	P07199	CENPB_HUMAN	Major centromere autoantigen B (Centromere protein B) (CENP-B)	CENPB
P07355;A6NMY6	P07355_S12,A6NMY6_S12	-1.77237	0.19479	A6NMY6;P07355	AXA2L_HUMAN;ANXA2_HUMAN	Putative annexin A2-like protein (Annexin A2 pseudogene 2) (Lipocortin II pseudogene);Annexin A2 (Annexin II) (Annexin-2) (Calpactin I heavy chain) (Calpactin-1 heavy chain) (Chromobindin-8) (Lipocortin II) (Placental anticoagulant protein IV) (PAP-IV) (Protein I) (p36)	ANXA2P2;ANXA2
P07814	P07814_S747	1.88876	NA	P07814	SYEP_HUMAN	Bifunctional glutamate/proline--tRNA ligase (Bifunctional aminoacyl-tRNA synthetase) (Cell proliferation-inducing gene 32 protein) (Glutamatyl-prolyl-tRNA synthetase) [Includes: Glutamate--tRNA ligase (EC 6.1.1.17) (Glutamyl-tRNA synthetase) (GluRS); Proline--tRNA ligase (EC 6.1.1.15) (Prolyl-tRNA synthetase)]	EPRS
P07814	P07814_S880	-1.32684	NA	P07814	SYEP_HUMAN	Bifunctional glutamate/proline--tRNA ligase (Bifunctional aminoacyl-tRNA synthetase) (Cell proliferation-inducing gene 32 protein) (Glutamatyl-prolyl-tRNA synthetase) [Includes: Glutamate--tRNA ligase (EC 6.1.1.17) (Glutamyl-tRNA synthetase) (GluRS); Proline--tRNA ligase (EC 6.1.1.15) (Prolyl-tRNA synthetase)]	EPRS
P07814	P07814_S883,P07814_S885	NA	NA	P07814	SYEP_HUMAN	Bifunctional glutamate/proline--tRNA ligase (Bifunctional aminoacyl-tRNA synthetase) (Cell proliferation-inducing gene 32 protein) (Glutamatyl-prolyl-tRNA synthetase) [Includes: Glutamate--tRNA ligase (EC 6.1.1.17) (Glutamyl-tRNA synthetase) (GluRS); Proline--tRNA ligase (EC 6.1.1.15) (Prolyl-tRNA synthetase)]	EPRS
P07814	P07814_S885	1.0182	0.62251	P07814	SYEP_HUMAN	Bifunctional glutamate/proline--tRNA ligase (Bifunctional aminoacyl-tRNA synthetase) (Cell proliferation-inducing gene 32 protein) (Glutamatyl-prolyl-tRNA synthetase) [Includes: Glutamate--tRNA ligase (EC 6.1.1.17) (Glutamyl-tRNA synthetase) (GluRS); Proline--tRNA ligase (EC 6.1.1.15) (Prolyl-tRNA synthetase)]	EPRS
P07900	P07900_S231	0.592661	0.329941	P07900	HS90A_HUMAN	Heat shock protein HSP 90-alpha (Heat shock 86 kDa) (HSP 86) (HSP86) (Renal carcinoma antigen NY-REN-38)	HSP90AA1
P07900	P07900_S252,P07900_S263	1.08052	0.0094405	P07900	HS90A_HUMAN	Heat shock protein HSP 90-alpha (Heat shock 86 kDa) (HSP 86) (HSP86) (Renal carcinoma antigen NY-REN-38)	HSP90AA1
P07900	P07900_S263	0.134679	0.651622	P07900	HS90A_HUMAN	Heat shock protein HSP 90-alpha (Heat shock 86 kDa) (HSP 86) (HSP86) (Renal carcinoma antigen NY-REN-38)	HSP90AA1
P07900;Q58FG0;Q14568	P07900_S263,Q58FG0_S89,Q14568_S263	-0.380809	0.228391	P07900;Q14568;Q58FG0	HS90A_HUMAN;HS902_HUMAN;HS905_HUMAN	Heat shock protein HSP 90-alpha (Heat shock 86 kDa) (HSP 86) (HSP86) (Renal carcinoma antigen NY-REN-38);Putative heat shock protein HSP 90-alpha A2 (Heat shock 90 kDa protein 1 alpha-like 3);Putative heat shock protein HSP 90-alpha A5 (Heat shock protein 90-alpha E) (Heat shock protein 90Ae)	HSP90AA1;HSP90AA2;HSP90AA5P
P07910	P07910_S233	2.11222	0.334718	P07910	HNRPC_HUMAN	Heterogeneous nuclear ribonucleoproteins C1/C2 (hnRNP C1/C2)	HNRNPC
P07910	P07910_S238,P07910_S239	1.40193	NA	P07910	HNRPC_HUMAN	Heterogeneous nuclear ribonucleoproteins C1/C2 (hnRNP C1/C2)	HNRNPC
P07919	P07919_S61	NA	NA	P07919	QCR6_HUMAN	Cytochrome b-c1 complex subunit 6, mitochondrial (Complex III subunit 6) (Complex III subunit VIII) (Cytochrome c1 non-heme 11 kDa protein) (Mitochondrial hinge protein) (Ubiquinol-cytochrome c reductase complex 11 kDa protein)	UQCRH
P07948	P07948_S13	-0.397043	0.710944	P07948	LYN_HUMAN	Tyrosine-protein kinase Lyn (EC 2.7.10.2) (Lck/Yes-related novel protein tyrosine kinase) (V-yes-1 Yamaguchi sarcoma viral related oncogene homolog) (p53Lyn) (p56Lyn)	LYN
P08047	P08047_S2	-2.05337	NA	P08047	SP1_HUMAN	Transcription factor Sp1	SP1
P08047	P08047_S7	-2.77012	NA	P08047	SP1_HUMAN	Transcription factor Sp1	SP1
P08107	P08107_S633	0.642967	0.241098	P08107	HSP71_HUMAN	Heat shock 70 kDa protein 1A/1B (Heat shock 70 kDa protein 1/2) (HSP70-1/HSP70-2) (HSP70.1/HSP70.2)	HSPA1A
P08238	P08238_S226	-0.129174	0.873264	P08238	HS90B_HUMAN	Heat shock protein HSP 90-beta (HSP 90) (Heat shock 84 kDa) (HSP 84) (HSP84)	HSP90AB1
P08238	P08238_S452	-0.763394	NA	P08238	HS90B_HUMAN	Heat shock protein HSP 90-beta (HSP 90) (Heat shock 84 kDa) (HSP 84) (HSP84)	HSP90AB1
P08238;Q58FF7	P08238_S226,Q58FF7_S205	-0.343111	0.27884	P08238;Q58FF7	HS90B_HUMAN;H90B3_HUMAN	Heat shock protein HSP 90-beta (HSP 90) (Heat shock 84 kDa) (HSP 84) (HSP84);Putative heat shock protein HSP 90-beta-3 (Heat shock protein 90-beta c) (Heat shock protein 90Bc)	HSP90AB1;HSP90AB3P
P08238;Q58FF8	P08238_S255,P08238_S261,Q58FF8_S177,Q58FF8_S183	1.13873	0.417777	P08238;Q58FF8	HS90B_HUMAN;H90B2_HUMAN	Heat shock protein HSP 90-beta (HSP 90) (Heat shock 84 kDa) (HSP 84) (HSP84);Putative heat shock protein HSP 90-beta 2 (Heat shock protein 90-beta b) (Heat shock protein 90Bb)	HSP90AB1;HSP90AB2P
P08238;Q58FF8	P08238_S255,Q58FF8_S177	0.315376	0.768926	P08238;Q58FF8	HS90B_HUMAN;H90B2_HUMAN	Heat shock protein HSP 90-beta (HSP 90) (Heat shock 84 kDa) (HSP 84) (HSP84);Putative heat shock protein HSP 90-beta 2 (Heat shock protein 90-beta b) (Heat shock protein 90Bb)	HSP90AB1;HSP90AB2P
P08397	P08397_S15	-0.463973	NA	P08397	HEM3_HUMAN	Porphobilinogen deaminase (PBG-D) (EC 2.5.1.61) (Hydroxymethylbilane synthase) (HMBS) (Pre-uroporphyrinogen synthase)	HMBS
P08559	P08559_S232	-0.24639	NA	P08559	ODPA_HUMAN	Pyruvate dehydrogenase E1 component subunit alpha, somatic form, mitochondrial (EC 1.2.4.1) (PDHE1-A type I)	PDHA1
P08559;P29803	P08559_S293,P29803_S291	-0.734594	NA	P08559;P29803	ODPA_HUMAN;ODPAT_HUMAN	Pyruvate dehydrogenase E1 component subunit alpha, somatic form, mitochondrial (EC 1.2.4.1) (PDHE1-A type I);"Pyruvate dehydrogenase E1 component subunit alpha, testis-specific form, mitochondrial (EC 1.2.4.1) (PDHE1-A type II)"	PDHA1;PDHA2
P08581	P08581_S990	-1.28723	0.041038	P08581	MET_HUMAN	Hepatocyte growth factor receptor (HGF receptor) (EC 2.7.10.1) (HGF/SF receptor) (Proto-oncogene c-Met) (Scatter factor receptor) (SF receptor) (Tyrosine-protein kinase Met)	MET
P08621	P08621_S226	-1.08967	0.477041	P08621	RU17_HUMAN	U1 small nuclear ribonucleoprotein 70 kDa (U1 snRNP 70 kDa) (U1-70K) (snRNP70)	SNRNP70
P08621	P08621_S410	0.21779	0.776993	P08621	RU17_HUMAN	U1 small nuclear ribonucleoprotein 70 kDa (U1 snRNP 70 kDa) (U1-70K) (snRNP70)	SNRNP70
P08651	P08651_S276	2.09964	NA	P08651	NFIC_HUMAN	Nuclear factor 1 C-type (NF1-C) (Nuclear factor 1/C) (CCAAT-box-binding transcription factor) (CTF) (Nuclear factor I/C) (NF-I/C) (NFI-C) (TGGCA-binding protein)	NFIC
P08651	P08651_S323	NA	NA	P08651	NFIC_HUMAN	Nuclear factor 1 C-type (NF1-C) (Nuclear factor 1/C) (CCAAT-box-binding transcription factor) (CTF) (Nuclear factor I/C) (NF-I/C) (NFI-C) (TGGCA-binding protein)	NFIC
P08651	P08651_S339	-0.64611	NA	P08651	NFIC_HUMAN	Nuclear factor 1 C-type (NF1-C) (Nuclear factor 1/C) (CCAAT-box-binding transcription factor) (CTF) (Nuclear factor I/C) (NF-I/C) (NFI-C) (TGGCA-binding protein)	NFIC
P08670	P08670_S39	0.220818	NA	P08670	VIME_HUMAN	Vimentin	VIM
P08670	P08670_S56	0.113029	NA	P08670	VIME_HUMAN	Vimentin	VIM
P08670	P08670_S72	1.08314	NA	P08670	VIME_HUMAN	Vimentin	VIM
P08670	P08670_S73	-0.0250817	NA	P08670	VIME_HUMAN	Vimentin	VIM
P09601	P09601_S229	-0.895337	0.322319	P09601	HMOX1_HUMAN	Heme oxygenase 1 (HO-1) (EC 1.14.99.3)	HMOX1
P09651	P09651_S4	NA	NA	P09651	ROA1_HUMAN	Heterogeneous nuclear ribonucleoprotein A1 (hnRNP A1) (Helix-destabilizing protein) (Single-strand RNA-binding protein) (hnRNP core protein A1)	HNRNPA1
P09651	P09651_S6	-0.897947	0.202749	P09651	ROA1_HUMAN	Heterogeneous nuclear ribonucleoprotein A1 (hnRNP A1) (Helix-destabilizing protein) (Single-strand RNA-binding protein) (hnRNP core protein A1)	HNRNPA1
P09874	P09874_T361	NA	NA	P09874	PARP1_HUMAN	Poly [ADP-ribose] polymerase 1 (PARP-1) (EC 2.4.2.30) (ADP-ribosyltransferase diphtheria toxin-like 1) (ARTD1) (NAD(+) ADP-ribosyltransferase 1) (ADPRT 1) (Poly[ADP-ribose] synthase 1)	PARP1
P09884	P09884_S186	-0.845264	0.835272	P09884	DPOLA_HUMAN	DNA polymerase alpha catalytic subunit (EC 2.7.7.7) (DNA polymerase alpha catalytic subunit p180)	POLA1
P09884	P09884_S209	0.361907	NA	P09884	DPOLA_HUMAN	DNA polymerase alpha catalytic subunit (EC 2.7.7.7) (DNA polymerase alpha catalytic subunit p180)	POLA1
P0C1Z6	P0C1Z6_S180	-0.236735	NA	P0C1Z6	TFPT_HUMAN	TCF3 fusion partner (INO80 complex subunit F) (Protein FB1)	TFPT
P0C1Z6	P0C1Z6_S252	-5.54809	NA	P0C1Z6	TFPT_HUMAN	TCF3 fusion partner (INO80 complex subunit F) (Protein FB1)	TFPT
P0C7T5	P0C7T5_S284	1.54448	NA	P0C7T5	ATX1L_HUMAN	Ataxin-1-like (Brother of ataxin-1) (Brother of ATXN1)	ATXN1L
P0CAP2	P0CAP2_S178	NA	NA	P0CAP2	GRL1A_HUMAN	DNA-directed RNA polymerase II subunit GRINL1A (DNA-directed RNA polymerase II subunit M) (Glutamate receptor-like protein 1A)	POLR2M
P0CAP2	P0CAP2_S72	-0.54198	0.687369	P0CAP2	GRL1A_HUMAN	DNA-directed RNA polymerase II subunit GRINL1A (DNA-directed RNA polymerase II subunit M) (Glutamate receptor-like protein 1A)	POLR2M
P0CG42	P0CG42_S132,P0CG42_S133	NA	NA	P0CG42	F157B_HUMAN	Putative protein FAM157B	FAM157B
P0CW22;P08708	P0CW22_S113,P08708_S113	-1.58279	NA	P08708;P0CW22	RS17_HUMAN;RS17L_HUMAN	40S ribosomal protein S17;40S ribosomal protein S17-like	RPS17;RPS17L
P0DI83	P0DI83_S13	NA	NA	P0DI83	NARR_HUMAN	Ras-related protein Rab-34, isoform NARR (Nine amino-acid residue-repeats)	RAB34
P10071	P10071_S1006	-1.3751	0.420465	P10071	GLI3_HUMAN	Transcriptional activator GLI3 (GLI3 form of 190 kDa) (GLI3-190) (GLI3 full length protein) (GLI3FL) [Cleaved into: Transcriptional repressor GLI3R (GLI3 C-terminally truncated form) (GLI3 form of 83 kDa) (GLI3-83)]	GLI3
P10071	P10071_S664	NA	NA	P10071	GLI3_HUMAN	Transcriptional activator GLI3 (GLI3 form of 190 kDa) (GLI3-190) (GLI3 full length protein) (GLI3FL) [Cleaved into: Transcriptional repressor GLI3R (GLI3 C-terminally truncated form) (GLI3 form of 83 kDa) (GLI3-83)]	GLI3
P10074	P10074_S169	0.532241	NA	P10074	ZBT48_HUMAN	Zinc finger and BTB domain-containing protein 48 (Krueppel-related zinc finger protein 3) (Protein HKR3) (Zinc finger protein 855)	ZBTB48
P10075	P10075_S86	-0.300263	0.721207	P10075	GLI4_HUMAN	Zinc finger protein GLI4 (Krueppel-related zinc finger protein 4) (Protein HKR4)	GLI4
P10244	P10244_S241	0.696565	NA	P10244	MYBB_HUMAN	Myb-related protein B (B-Myb) (Myb-like protein 2)	MYBL2
P10275	P10275_S16	1.42761	NA	P10275	ANDR_HUMAN	Androgen receptor (Dihydrotestosterone receptor) (Nuclear receptor subfamily 3 group C member 4)	AR
P10398	P10398_S186	NA	NA	P10398	ARAF_HUMAN	Serine/threonine-protein kinase A-Raf (EC 2.7.11.1) (Proto-oncogene A-Raf) (Proto-oncogene A-Raf-1) (Proto-oncogene Pks)	ARAF
P10398	P10398_S269	NA	NA	P10398	ARAF_HUMAN	Serine/threonine-protein kinase A-Raf (EC 2.7.11.1) (Proto-oncogene A-Raf) (Proto-oncogene A-Raf-1) (Proto-oncogene Pks)	ARAF
P10398	P10398_S580	-0.323373	0.613349	P10398	ARAF_HUMAN	Serine/threonine-protein kinase A-Raf (EC 2.7.11.1) (Proto-oncogene A-Raf) (Proto-oncogene A-Raf-1) (Proto-oncogene Pks)	ARAF
P10398	P10398_T253	-1.01673	NA	P10398	ARAF_HUMAN	Serine/threonine-protein kinase A-Raf (EC 2.7.11.1) (Proto-oncogene A-Raf) (Proto-oncogene A-Raf-1) (Proto-oncogene Pks)	ARAF
P10412	P10412_S2	-0.715548	0.235233	P10412	H14_HUMAN	Histone H1.4 (Histone H1b) (Histone H1s-4)	HIST1H1E
P10412	P10412_T18	-0.690159	0.640266	P10412	H14_HUMAN	Histone H1.4 (Histone H1b) (Histone H1s-4)	HIST1H1E
P10412;P16402	P10412_S36,P16402_S37	-0.568015	0.344048	P10412;P16402	H14_HUMAN;H13_HUMAN	Histone H1.4 (Histone H1b) (Histone H1s-4);Histone H1.3 (Histone H1c) (Histone H1s-2)	HIST1H1E;HIST1H1D
P10412;P16402;P16403	P10412_S36,P16402_S37,P16403_S36	0.131496	0.809961	P10412;P16402;P16403	H14_HUMAN;H13_HUMAN;H12_HUMAN	Histone H1.4 (Histone H1b) (Histone H1s-4);Histone H1.3 (Histone H1c) (Histone H1s-2);Histone H1.2 (Histone H1c) (Histone H1d) (Histone H1s-1)	HIST1H1E;HIST1H1D;HIST1H1C
P10412;Q02539;P16401;P16402;P16403	P10412_S102,Q02539_S105,P16401_S105,P16402_S103,P16403_S102	-0.206208	0.552806	P10412;P16401;P16402;P16403;Q02539	H14_HUMAN;H15_HUMAN;H13_HUMAN;H12_HUMAN;H11_HUMAN	Histone H1.4 (Histone H1b) (Histone H1s-4);Histone H1.5 (Histone H1a) (Histone H1b) (Histone H1s-3);Histone H1.3 (Histone H1c) (Histone H1s-2);Histone H1.2 (Histone H1c) (Histone H1d) (Histone H1s-1);Histone H1.1 (Histone H1a)	HIST1H1E;HIST1H1B;HIST1H1D;HIST1H1C;HIST1H1A
P10412;Q02539;P16401;P16402;P16403	P10412_S104,Q02539_S107,P16401_S107,P16402_S105,P16403_S104	1.15943	NA	P10412;P16401;P16402;P16403;Q02539	H14_HUMAN;H15_HUMAN;H13_HUMAN;H12_HUMAN;H11_HUMAN	Histone H1.4 (Histone H1b) (Histone H1s-4);Histone H1.5 (Histone H1a) (Histone H1b) (Histone H1s-3);Histone H1.3 (Histone H1c) (Histone H1s-2);Histone H1.2 (Histone H1c) (Histone H1d) (Histone H1s-1);Histone H1.1 (Histone H1a)	HIST1H1E;HIST1H1B;HIST1H1D;HIST1H1C;HIST1H1A
P10636	P10636_S515	-1.87943	NA	P10636	TAU_HUMAN	Microtubule-associated protein tau (Neurofibrillary tangle protein) (Paired helical filament-tau) (PHF-tau)	MAPT
P10636	P10636_S516	NA	NA	P10636	TAU_HUMAN	Microtubule-associated protein tau (Neurofibrillary tangle protein) (Paired helical filament-tau) (PHF-tau)	MAPT
P10636	P10636_S519	NA	NA	P10636	TAU_HUMAN	Microtubule-associated protein tau (Neurofibrillary tangle protein) (Paired helical filament-tau) (PHF-tau)	MAPT
P10636	P10636_S527	-1.92653	NA	P10636	TAU_HUMAN	Microtubule-associated protein tau (Neurofibrillary tangle protein) (Paired helical filament-tau) (PHF-tau)	MAPT
P10636	P10636_S713,P10636_S717	-0.332564	0.589848	P10636	TAU_HUMAN	Microtubule-associated protein tau (Neurofibrillary tangle protein) (Paired helical filament-tau) (PHF-tau)	MAPT
P10636	P10636_S713,P10636_T720	NA	NA	P10636	TAU_HUMAN	Microtubule-associated protein tau (Neurofibrillary tangle protein) (Paired helical filament-tau) (PHF-tau)	MAPT
P10636	P10636_S713,P10636_T720,P10636_S721	NA	NA	P10636	TAU_HUMAN	Microtubule-associated protein tau (Neurofibrillary tangle protein) (Paired helical filament-tau) (PHF-tau)	MAPT
P10636	P10636_S721	-0.0674895	NA	P10636	TAU_HUMAN	Microtubule-associated protein tau (Neurofibrillary tangle protein) (Paired helical filament-tau) (PHF-tau)	MAPT
P10636	P10636_Y514,P10636_S519	0.341474	0.572236	P10636	TAU_HUMAN	Microtubule-associated protein tau (Neurofibrillary tangle protein) (Paired helical filament-tau) (PHF-tau)	MAPT
P10644	P10644_S83	0.325436	0.706272	P10644	KAP0_HUMAN	cAMP-dependent protein kinase type I-alpha regulatory subunit (Tissue-specific extinguisher 1) (TSE1) [Cleaved into: cAMP-dependent protein kinase type I-alpha regulatory subunit, N-terminally processed]	PRKAR1A
P10809	P10809_S410	-0.219218	0.756637	P10809	CH60_HUMAN	60 kDa heat shock protein, mitochondrial (60 kDa chaperonin) (Chaperonin 60) (CPN60) (Heat shock protein 60) (HSP-60) (Hsp60) (HuCHA60) (Mitochondrial matrix protein P1) (P60 lymphocyte protein)	HSPD1
P10809	P10809_S70	-0.945807	0.338979	P10809	CH60_HUMAN	60 kDa heat shock protein, mitochondrial (60 kDa chaperonin) (Chaperonin 60) (CPN60) (Heat shock protein 60) (HSP-60) (Hsp60) (HuCHA60) (Mitochondrial matrix protein P1) (P60 lymphocyte protein)	HSPD1
P11171	P11171_S542	-0.529098	0.675575	P11171	41_HUMAN	Protein 4.1 (P4.1) (4.1R) (Band 4.1) (EPB4.1)	EPB41
P11171	P11171_S56	0.953538	NA	P11171	41_HUMAN	Protein 4.1 (P4.1) (4.1R) (Band 4.1) (EPB4.1)	EPB41
P11171	P11171_S712	-1.4678	NA	P11171	41_HUMAN	Protein 4.1 (P4.1) (4.1R) (Band 4.1) (EPB4.1)	EPB41
P11217;P11216	P11217_S15,P11216_S15	2.48624	NA	P11216;P11217	PYGB_HUMAN;PYGM_HUMAN	Glycogen phosphorylase, brain form (EC 2.4.1.1);"Glycogen phosphorylase, muscle form (EC 2.4.1.1) (Myophosphorylase)"	PYGB;PYGM
P11274	P11274_S122	-0.503962	NA	P11274	BCR_HUMAN	Breakpoint cluster region protein (EC 2.7.11.1) (Renal carcinoma antigen NY-REN-26)	BCR
P11274	P11274_S235	0.0551567	NA	P11274	BCR_HUMAN	Breakpoint cluster region protein (EC 2.7.11.1) (Renal carcinoma antigen NY-REN-26)	BCR
P11274	P11274_S459	-0.510799	0.541185	P11274	BCR_HUMAN	Breakpoint cluster region protein (EC 2.7.11.1) (Renal carcinoma antigen NY-REN-26)	BCR
P11387	P11387_S2	-0.280452	NA	P11387	TOP1_HUMAN	DNA topoisomerase 1 (EC 5.99.1.2) (DNA topoisomerase I)	TOP1
P11388	P11388_S1106	1.28195	0.169473	P11388	TOP2A_HUMAN	DNA topoisomerase 2-alpha (EC 5.99.1.3) (DNA topoisomerase II, alpha isozyme)	TOP2A
P11388	P11388_S1247	-0.607555	NA	P11388	TOP2A_HUMAN	DNA topoisomerase 2-alpha (EC 5.99.1.3) (DNA topoisomerase II, alpha isozyme)	TOP2A
P11388	P11388_S1377	-1.93862	NA	P11388	TOP2A_HUMAN	DNA topoisomerase 2-alpha (EC 5.99.1.3) (DNA topoisomerase II, alpha isozyme)	TOP2A
P11388	P11388_S29	0.786009	NA	P11388	TOP2A_HUMAN	DNA topoisomerase 2-alpha (EC 5.99.1.3) (DNA topoisomerase II, alpha isozyme)	TOP2A
P11586	P11586_S490	2.15705	0.014141	P11586	C1TC_HUMAN	C-1-tetrahydrofolate synthase, cytoplasmic (C1-THF synthase) [Includes: Methylenetetrahydrofolate dehydrogenase (EC 1.5.1.5); Methenyltetrahydrofolate cyclohydrolase (EC 3.5.4.9); Formyltetrahydrofolate synthetase (EC 6.3.4.3)]	MTHFD1
P11717	P11717_S2347	2.78669	0.300307	P11717	MPRI_HUMAN	Cation-independent mannose-6-phosphate receptor (CI Man-6-P receptor) (CI-MPR) (M6PR) (300 kDa mannose 6-phosphate receptor) (MPR 300) (Insulin-like growth factor 2 receptor) (Insulin-like growth factor II receptor) (IGF-II receptor) (M6P/IGF2 receptor) (M6P/IGF2R) (CD antigen CD222)	IGF2R
P11717	P11717_S2409	-0.829531	NA	P11717	MPRI_HUMAN	Cation-independent mannose-6-phosphate receptor (CI Man-6-P receptor) (CI-MPR) (M6PR) (300 kDa mannose 6-phosphate receptor) (MPR 300) (Insulin-like growth factor 2 receptor) (Insulin-like growth factor II receptor) (IGF-II receptor) (M6P/IGF2 receptor) (M6P/IGF2R) (CD antigen CD222)	IGF2R
P11717	P11717_S2484	NA	NA	P11717	MPRI_HUMAN	Cation-independent mannose-6-phosphate receptor (CI Man-6-P receptor) (CI-MPR) (M6PR) (300 kDa mannose 6-phosphate receptor) (MPR 300) (Insulin-like growth factor 2 receptor) (Insulin-like growth factor II receptor) (IGF-II receptor) (M6P/IGF2 receptor) (M6P/IGF2R) (CD antigen CD222)	IGF2R
P12270	P12270_S1185	-0.353791	0.795055	P12270	TPR_HUMAN	Nucleoprotein TPR	TPR
P12270	P12270_S2073	1.33186	0.468069	P12270	TPR_HUMAN	Nucleoprotein TPR	TPR
P12270	P12270_S379	-3.66257	NA	P12270	TPR_HUMAN	Nucleoprotein TPR	TPR
P12270	P12270_S522	0.601866	NA	P12270	TPR_HUMAN	Nucleoprotein TPR	TPR
P12271	P12271_T7	1.74327	NA	P12271	RLBP1_HUMAN	Retinaldehyde-binding protein 1 (Cellular retinaldehyde-binding protein)	RLBP1
P12694	P12694_S337	-0.358404	NA	P12694	ODBA_HUMAN	2-oxoisovalerate dehydrogenase subunit alpha, mitochondrial (EC 1.2.4.4) (Branched-chain alpha-keto acid dehydrogenase E1 component alpha chain) (BCKDE1A) (BCKDH E1-alpha)	BCKDHA
P12694	P12694_S347	NA	NA	P12694	ODBA_HUMAN	2-oxoisovalerate dehydrogenase subunit alpha, mitochondrial (EC 1.2.4.4) (Branched-chain alpha-keto acid dehydrogenase E1 component alpha chain) (BCKDE1A) (BCKDH E1-alpha)	BCKDHA
P12694	P12694_T338	NA	NA	P12694	ODBA_HUMAN	2-oxoisovalerate dehydrogenase subunit alpha, mitochondrial (EC 1.2.4.4) (Branched-chain alpha-keto acid dehydrogenase E1 component alpha chain) (BCKDE1A) (BCKDH E1-alpha)	BCKDHA
P12755	P12755_S431	0.120295	NA	P12755	SKI_HUMAN	Ski oncogene (Proto-oncogene c-Ski)	SKI
P12755	P12755_S432	-1.86707	NA	P12755	SKI_HUMAN	Ski oncogene (Proto-oncogene c-Ski)	SKI
P12755	P12755_S480	-1.12539	NA	P12755	SKI_HUMAN	Ski oncogene (Proto-oncogene c-Ski)	SKI
P12814;O43707	P12814_S404,O43707_S423	NA	NA	O43707;P12814	ACTN4_HUMAN;ACTN1_HUMAN	Alpha-actinin-4 (F-actin cross-linking protein) (Non-muscle alpha-actinin 4);Alpha-actinin-1 (Alpha-actinin cytoskeletal isoform) (F-actin cross-linking protein) (Non-muscle alpha-actinin-1)	ACTN4;ACTN1
P12931	P12931_S17	-0.195715	NA	P12931	SRC_HUMAN	Proto-oncogene tyrosine-protein kinase Src (EC 2.7.10.2) (Proto-oncogene c-Src) (pp60c-src) (p60-Src)	SRC
P12931;P06239;P06241;P07947	P12931_Y419,P06239_Y394,P06241_Y420,P07947_Y426	0.00320129	NA	P06239;P06241;P07947;P12931	LCK_HUMAN;FYN_HUMAN;YES_HUMAN;SRC_HUMAN	Tyrosine-protein kinase Lck (EC 2.7.10.2) (Leukocyte C-terminal Src kinase) (LSK) (Lymphocyte cell-specific protein-tyrosine kinase) (Protein YT16) (Proto-oncogene Lck) (T cell-specific protein-tyrosine kinase) (p56-LCK);Tyrosine-protein kinase Fyn (EC 2.7.10.2) (Proto-oncogene Syn) (Proto-oncogene c-Fyn) (Src-like kinase) (SLK) (p59-Fyn);Tyrosine-protein kinase Yes (EC 2.7.10.2) (Proto-oncogene …	LCK;FYN;YES1;SRC
P12956	P12956_S475	-2.23996	NA	P12956	XRCC6_HUMAN	X-ray repair cross-complementing protein 6 (EC 3.6.4.-) (EC 4.2.99.-) (5'-deoxyribose-5-phosphate lyase Ku70) (5'-dRP lyase Ku70) (70 kDa subunit of Ku antigen) (ATP-dependent DNA helicase 2 subunit 1) (ATP-dependent DNA helicase II 70 kDa subunit) (CTC box-binding factor 75 kDa subunit) (CTC75) (CTCBF) (DNA repair protein XRCC6) (Lupus Ku autoantigen protein p70) (Ku70) (Thyroid-lupus autoantige…	XRCC6
P12956	P12956_S520	-1.73532	NA	P12956	XRCC6_HUMAN	X-ray repair cross-complementing protein 6 (EC 3.6.4.-) (EC 4.2.99.-) (5'-deoxyribose-5-phosphate lyase Ku70) (5'-dRP lyase Ku70) (70 kDa subunit of Ku antigen) (ATP-dependent DNA helicase 2 subunit 1) (ATP-dependent DNA helicase II 70 kDa subunit) (CTC box-binding factor 75 kDa subunit) (CTC75) (CTCBF) (DNA repair protein XRCC6) (Lupus Ku autoantigen protein p70) (Ku70) (Thyroid-lupus autoantige…	XRCC6
P13051	P13051_S23	-0.920328	0.484898	P13051	UNG_HUMAN	Uracil-DNA glycosylase (UDG) (EC 3.2.2.27)	UNG
P13051	P13051_T60	-0.0174074	NA	P13051	UNG_HUMAN	Uracil-DNA glycosylase (UDG) (EC 3.2.2.27)	UNG
P13224	P13224_S191	-2.34646	0.258828	P13224	GP1BB_HUMAN	Platelet glycoprotein Ib beta chain (GP-Ib beta) (GPIb-beta) (GPIbB) (Antigen CD42b-beta) (CD antigen CD42c)	GP1BB
P13489	P13489_S2	-2.805	0.340892	P13489	RINI_HUMAN	Ribonuclease inhibitor (Placental ribonuclease inhibitor) (Placental RNase inhibitor) (Ribonuclease/angiogenin inhibitor 1) (RAI)	RNH1
P13639	P13639_T57	1.0544	0.568467	P13639	EF2_HUMAN	Elongation factor 2 (EF-2)	EEF2
P13716	P13716_S214	NA	NA	P13716	HEM2_HUMAN	Delta-aminolevulinic acid dehydratase (ALADH) (EC 4.2.1.24) (Porphobilinogen synthase)	ALAD
P13796	P13796_S5	-1.77119	NA	P13796	PLSL_HUMAN	Plastin-2 (L-plastin) (LC64P) (Lymphocyte cytosolic protein 1) (LCP-1)	LCP1
P13798	P13798_S187	-0.198567	0.604199	P13798	ACPH_HUMAN	Acylamino-acid-releasing enzyme (AARE) (EC 3.4.19.1) (Acyl-peptide hydrolase) (APH) (Acylaminoacyl-peptidase) (Oxidized protein hydrolase) (OPH)	APEH
P13807	P13807_S652	1.73491	NA	P13807	GYS1_HUMAN	Glycogen [starch] synthase, muscle (EC 2.4.1.11)	GYS1
P13807	P13807_S653	NA	NA	P13807	GYS1_HUMAN	Glycogen [starch] synthase, muscle (EC 2.4.1.11)	GYS1
P13807	P13807_S710	NA	NA	P13807	GYS1_HUMAN	Glycogen [starch] synthase, muscle (EC 2.4.1.11)	GYS1
P13807	P13807_T713	-0.0148733	NA	P13807	GYS1_HUMAN	Glycogen [starch] synthase, muscle (EC 2.4.1.11)	GYS1
P13861	P13861_S78	-0.841846	0.663099	P13861	KAP2_HUMAN	cAMP-dependent protein kinase type II-alpha regulatory subunit	PRKAR2A
P13861	P13861_S78,P13861_S80	1.13747	0.740914	P13861	KAP2_HUMAN	cAMP-dependent protein kinase type II-alpha regulatory subunit	PRKAR2A
P13861	P13861_S99	-0.67183	0.18512	P13861	KAP2_HUMAN	cAMP-dependent protein kinase type II-alpha regulatory subunit	PRKAR2A
P13994	P13994_S300	0.145791	0.603506	P13994	CC130_HUMAN	Coiled-coil domain-containing protein 130 (9 kDa protein)	CCDC130
P14618	P14618_S249	4.54527	NA	P14618	KPYM_HUMAN	Pyruvate kinase isozymes M1/M2 (EC 2.7.1.40) (Cytosolic thyroid hormone-binding protein) (CTHBP) (Opa-interacting protein 3) (OIP-3) (Pyruvate kinase 2/3) (Pyruvate kinase muscle isozyme) (Thyroid hormone-binding protein 1) (THBP1) (Tumor M2-PK) (p58)	PKM
P14618	P14618_S37	-1.51753	NA	P14618	KPYM_HUMAN	Pyruvate kinase isozymes M1/M2 (EC 2.7.1.40) (Cytosolic thyroid hormone-binding protein) (CTHBP) (Opa-interacting protein 3) (OIP-3) (Pyruvate kinase 2/3) (Pyruvate kinase muscle isozyme) (Thyroid hormone-binding protein 1) (THBP1) (Tumor M2-PK) (p58)	PKM
P14625	P14625_S306	-0.654389	0.279581	P14625	ENPL_HUMAN	Endoplasmin (94 kDa glucose-regulated protein) (GRP-94) (Heat shock protein 90 kDa beta member 1) (Tumor rejection antigen 1) (gp96 homolog)	HSP90B1
P14625	P14625_S42	1.80591	0.180809	P14625	ENPL_HUMAN	Endoplasmin (94 kDa glucose-regulated protein) (GRP-94) (Heat shock protein 90 kDa beta member 1) (Tumor rejection antigen 1) (gp96 homolog)	HSP90B1
P14625	P14625_T44	0.942415	NA	P14625	ENPL_HUMAN	Endoplasmin (94 kDa glucose-regulated protein) (GRP-94) (Heat shock protein 90 kDa beta member 1) (Tumor rejection antigen 1) (gp96 homolog)	HSP90B1
P15056	P15056_S151	0.751884	0.348734	P15056	BRAF_HUMAN	Serine/threonine-protein kinase B-raf (EC 2.7.11.1) (Proto-oncogene B-Raf) (p94) (v-Raf murine sarcoma viral oncogene homolog B1)	BRAF
P15056	P15056_S363	-0.28658	0.743805	P15056	BRAF_HUMAN	Serine/threonine-protein kinase B-raf (EC 2.7.11.1) (Proto-oncogene B-Raf) (p94) (v-Raf murine sarcoma viral oncogene homolog B1)	BRAF
P15056	P15056_S365	-1.77997	NA	P15056	BRAF_HUMAN	Serine/threonine-protein kinase B-raf (EC 2.7.11.1) (Proto-oncogene B-Raf) (p94) (v-Raf murine sarcoma viral oncogene homolog B1)	BRAF
P15056	P15056_S419	3.13854	NA	P15056	BRAF_HUMAN	Serine/threonine-protein kinase B-raf (EC 2.7.11.1) (Proto-oncogene B-Raf) (p94) (v-Raf murine sarcoma viral oncogene homolog B1)	BRAF
P15056	P15056_S729	0.0775376	0.921132	P15056	BRAF_HUMAN	Serine/threonine-protein kinase B-raf (EC 2.7.11.1) (Proto-oncogene B-Raf) (p94) (v-Raf murine sarcoma viral oncogene homolog B1)	BRAF
P15056	P15056_S750	NA	NA	P15056	BRAF_HUMAN	Serine/threonine-protein kinase B-raf (EC 2.7.11.1) (Proto-oncogene B-Raf) (p94) (v-Raf murine sarcoma viral oncogene homolog B1)	BRAF
P15151	P15151_S406	1.85301	0.382653	P15151	PVR_HUMAN	Poliovirus receptor (Nectin-like protein 5) (NECL-5) (CD antigen CD155)	PVR
P15336	P15336_S112	-0.413479	0.86865	P15336	ATF2_HUMAN	Cyclic AMP-dependent transcription factor ATF-2 (cAMP-dependent transcription factor ATF-2) (Activating transcription factor 2) (Cyclic AMP-responsive element-binding protein 2) (CREB-2) (cAMP-responsive element-binding protein 2) (HB16) (cAMP response element-binding protein CRE-BP1)	ATF2
P15336	P15336_S307,P15336_S328	1.27617	NA	P15336	ATF2_HUMAN	Cyclic AMP-dependent transcription factor ATF-2 (cAMP-dependent transcription factor ATF-2) (Activating transcription factor 2) (Cyclic AMP-responsive element-binding protein 2) (CREB-2) (cAMP-responsive element-binding protein 2) (HB16) (cAMP response element-binding protein CRE-BP1)	ATF2
P15336	P15336_S307,P15336_T325	-0.701878	NA	P15336	ATF2_HUMAN	Cyclic AMP-dependent transcription factor ATF-2 (cAMP-dependent transcription factor ATF-2) (Activating transcription factor 2) (Cyclic AMP-responsive element-binding protein 2) (CREB-2) (cAMP-responsive element-binding protein 2) (HB16) (cAMP response element-binding protein CRE-BP1)	ATF2
P15336	P15336_S310	-0.735744	NA	P15336	ATF2_HUMAN	Cyclic AMP-dependent transcription factor ATF-2 (cAMP-dependent transcription factor ATF-2) (Activating transcription factor 2) (Cyclic AMP-responsive element-binding protein 2) (CREB-2) (cAMP-responsive element-binding protein 2) (HB16) (cAMP response element-binding protein CRE-BP1)	ATF2
P15336	P15336_S314	NA	NA	P15336	ATF2_HUMAN	Cyclic AMP-dependent transcription factor ATF-2 (cAMP-dependent transcription factor ATF-2) (Activating transcription factor 2) (Cyclic AMP-responsive element-binding protein 2) (CREB-2) (cAMP-responsive element-binding protein 2) (HB16) (cAMP response element-binding protein CRE-BP1)	ATF2
P15336	P15336_S328	1.72451	NA	P15336	ATF2_HUMAN	Cyclic AMP-dependent transcription factor ATF-2 (cAMP-dependent transcription factor ATF-2) (Activating transcription factor 2) (Cyclic AMP-responsive element-binding protein 2) (CREB-2) (cAMP-responsive element-binding protein 2) (HB16) (cAMP response element-binding protein CRE-BP1)	ATF2
P15336	P15336_T305	NA	NA	P15336	ATF2_HUMAN	Cyclic AMP-dependent transcription factor ATF-2 (cAMP-dependent transcription factor ATF-2) (Activating transcription factor 2) (Cyclic AMP-responsive element-binding protein 2) (CREB-2) (cAMP-responsive element-binding protein 2) (HB16) (cAMP response element-binding protein CRE-BP1)	ATF2
P15336	P15336_T325	-1.2993	NA	P15336	ATF2_HUMAN	Cyclic AMP-dependent transcription factor ATF-2 (cAMP-dependent transcription factor ATF-2) (Activating transcription factor 2) (Cyclic AMP-responsive element-binding protein 2) (CREB-2) (cAMP-responsive element-binding protein 2) (HB16) (cAMP response element-binding protein CRE-BP1)	ATF2
P15407	P15407_S101	-0.0791779	NA	P15407	FOSL1_HUMAN	Fos-related antigen 1 (FRA-1)	FOSL1
P15408	P15408_S120	1.31211	0.447389	P15408	FOSL2_HUMAN	Fos-related antigen 2 (FRA-2)	FOSL2
P15408	P15408_S16	2.6396	NA	P15408	FOSL2_HUMAN	Fos-related antigen 2 (FRA-2)	FOSL2
P15408	P15408_S19	2.2788	NA	P15408	FOSL2_HUMAN	Fos-related antigen 2 (FRA-2)	FOSL2
P15408	P15408_S200	0.903262	0.643843	P15408	FOSL2_HUMAN	Fos-related antigen 2 (FRA-2)	FOSL2
P15408	P15408_S230	0.22089	NA	P15408	FOSL2_HUMAN	Fos-related antigen 2 (FRA-2)	FOSL2
P15822	P15822_S1147	NA	NA	P15822	ZEP1_HUMAN	Zinc finger protein 40 (Cirhin interaction protein) (CIRIP) (Gate keeper of apoptosis-activating protein) (GAAP) (Human immunodeficiency virus type I enhancer-binding protein 1) (HIV-EP1) (Major histocompatibility complex-binding protein 1) (MBP-1) (Positive regulatory domain II-binding factor 1) (PRDII-BF1)	HIVEP1
P15822	P15822_S698	2.1322	NA	P15822	ZEP1_HUMAN	Zinc finger protein 40 (Cirhin interaction protein) (CIRIP) (Gate keeper of apoptosis-activating protein) (GAAP) (Human immunodeficiency virus type I enhancer-binding protein 1) (HIV-EP1) (Major histocompatibility complex-binding protein 1) (MBP-1) (Positive regulatory domain II-binding factor 1) (PRDII-BF1)	HIVEP1
P15880	P15880_S281	2.62332	0.200123	P15880	RS2_HUMAN	40S ribosomal protein S2 (40S ribosomal protein S4) (Protein LLRep3)	RPS2
P15884	P15884_S371	NA	NA	P15884	ITF2_HUMAN	Transcription factor 4 (TCF-4) (Class B basic helix-loop-helix protein 19) (bHLHb19) (Immunoglobulin transcription factor 2) (ITF-2) (SL3-3 enhancer factor 2) (SEF-2)	TCF4
P15923	P15923_S352,P15923_S359	0.234523	NA	P15923	TFE2_HUMAN	Transcription factor E2-alpha (Class B basic helix-loop-helix protein 21) (bHLHb21) (Immunoglobulin enhancer-binding factor E12/E47) (Immunoglobulin transcription factor 1) (Kappa-E2-binding factor) (Transcription factor 3) (TCF-3) (Transcription factor ITF-1)	TCF3
P15923	P15923_S379	-3.65799	0.0782699	P15923	TFE2_HUMAN	Transcription factor E2-alpha (Class B basic helix-loop-helix protein 21) (bHLHb21) (Immunoglobulin enhancer-binding factor E12/E47) (Immunoglobulin transcription factor 1) (Kappa-E2-binding factor) (Transcription factor 3) (TCF-3) (Transcription factor ITF-1)	TCF3
P16070	P16070_S697	1.04322	0.335249	P16070	CD44_HUMAN	CD44 antigen (CDw44) (Epican) (Extracellular matrix receptor III) (ECMR-III) (GP90 lymphocyte homing/adhesion receptor) (HUTCH-I) (Heparan sulfate proteoglycan) (Hermes antigen) (Hyaluronate receptor) (Phagocytic glycoprotein 1) (PGP-1) (Phagocytic glycoprotein I) (PGP-I) (CD antigen CD44)	CD44
P16070	P16070_S706	0.200701	0.748014	P16070	CD44_HUMAN	CD44 antigen (CDw44) (Epican) (Extracellular matrix receptor III) (ECMR-III) (GP90 lymphocyte homing/adhesion receptor) (HUTCH-I) (Heparan sulfate proteoglycan) (Hermes antigen) (Hyaluronate receptor) (Phagocytic glycoprotein 1) (PGP-1) (Phagocytic glycoprotein I) (PGP-I) (CD antigen CD44)	CD44
P16333	P16333_S66	-0.497513	NA	P16333	NCK1_HUMAN	Cytoplasmic protein NCK1 (NCK adaptor protein 1) (Nck-1) (SH2/SH3 adaptor protein NCK-alpha)	NCK1
P16333	P16333_S85	-0.560496	NA	P16333	NCK1_HUMAN	Cytoplasmic protein NCK1 (NCK adaptor protein 1) (Nck-1) (SH2/SH3 adaptor protein NCK-alpha)	NCK1
P16383	P16383_S16	0.133601	0.886006	P16383	GCFC2_HUMAN	GC-rich sequence DNA-binding factor 2 (GC-rich sequence DNA-binding factor) (Transcription factor 9) (TCF-9)	GCFC2
P16383	P16383_S17	NA	NA	P16383	GCFC2_HUMAN	GC-rich sequence DNA-binding factor 2 (GC-rich sequence DNA-binding factor) (Transcription factor 9) (TCF-9)	GCFC2
P16383	P16383_S19	-0.285192	NA	P16383	GCFC2_HUMAN	GC-rich sequence DNA-binding factor 2 (GC-rich sequence DNA-binding factor) (Transcription factor 9) (TCF-9)	GCFC2
P16383	P16383_S96	NA	NA	P16383	GCFC2_HUMAN	GC-rich sequence DNA-binding factor 2 (GC-rich sequence DNA-binding factor) (Transcription factor 9) (TCF-9)	GCFC2
P16383	P16383_S96,P16383_T97	-1.76764	0.373726	P16383	GCFC2_HUMAN	GC-rich sequence DNA-binding factor 2 (GC-rich sequence DNA-binding factor) (Transcription factor 9) (TCF-9)	GCFC2
P16401	P16401_S18	0.399053	0.737179	P16401	H15_HUMAN	Histone H1.5 (Histone H1a) (Histone H1b) (Histone H1s-3)	HIST1H1B
P16401	P16401_S2	-0.572893	0.590125	P16401	H15_HUMAN	Histone H1.5 (Histone H1a) (Histone H1b) (Histone H1s-3)	HIST1H1B
P16401	P16401_S2,P16401_S18	-0.62734	NA	P16401	H15_HUMAN	Histone H1.5 (Histone H1a) (Histone H1b) (Histone H1s-3)	HIST1H1B
P16401	P16401_T4,P16401_S18	-1.18272	NA	P16401	H15_HUMAN	Histone H1.5 (Histone H1a) (Histone H1b) (Histone H1s-3)	HIST1H1B
P16402	P16402_S2	-0.571536	0.719917	P16402	H13_HUMAN	Histone H1.3 (Histone H1c) (Histone H1s-2)	HIST1H1D
P16402	P16402_T18	-1.78663	0.525773	P16402	H13_HUMAN	Histone H1.3 (Histone H1c) (Histone H1s-2)	HIST1H1D
P16403	P16403_S2	-0.807335	0.364293	P16403	H12_HUMAN	Histone H1.2 (Histone H1c) (Histone H1d) (Histone H1s-1)	HIST1H1C
P16949	P16949_S16	-0.458728	0.733326	P16949	STMN1_HUMAN	Stathmin (Leukemia-associated phosphoprotein p18) (Metablastin) (Oncoprotein 18) (Op18) (Phosphoprotein p19) (pp19) (Prosolin) (Protein Pr22) (pp17)	STMN1
P16949	P16949_S16,P16949_S25	-0.278906	0.945892	P16949	STMN1_HUMAN	Stathmin (Leukemia-associated phosphoprotein p18) (Metablastin) (Oncoprotein 18) (Op18) (Phosphoprotein p19) (pp19) (Prosolin) (Protein Pr22) (pp17)	STMN1
P16949	P16949_S25	-1.3142	0.464666	P16949	STMN1_HUMAN	Stathmin (Leukemia-associated phosphoprotein p18) (Metablastin) (Oncoprotein 18) (Op18) (Phosphoprotein p19) (pp19) (Prosolin) (Protein Pr22) (pp17)	STMN1
P16949	P16949_S38	-1.23965	0.284893	P16949	STMN1_HUMAN	Stathmin (Leukemia-associated phosphoprotein p18) (Metablastin) (Oncoprotein 18) (Op18) (Phosphoprotein p19) (pp19) (Prosolin) (Protein Pr22) (pp17)	STMN1
P16949	P16949_S63	2.46519	0.0579312	P16949	STMN1_HUMAN	Stathmin (Leukemia-associated phosphoprotein p18) (Metablastin) (Oncoprotein 18) (Op18) (Phosphoprotein p19) (pp19) (Prosolin) (Protein Pr22) (pp17)	STMN1
P16949;Q93045	P16949_S46,Q93045_S80	1.04742	0.483288	P16949;Q93045	STMN1_HUMAN;STMN2_HUMAN	Stathmin (Leukemia-associated phosphoprotein p18) (Metablastin) (Oncoprotein 18) (Op18) (Phosphoprotein p19) (pp19) (Prosolin) (Protein Pr22) (pp17);Stathmin-2 (Superior cervical ganglion-10 protein) (Protein SCG10)	STMN1;STMN2
P16989	P16989_S34	NA	NA	P16989	DBPA_HUMAN	DNA-binding protein A (Cold shock domain-containing protein A) (Single-strand DNA-binding protein NF-GMB)	CSDA
P16989	P16989_S38	NA	NA	P16989	DBPA_HUMAN	DNA-binding protein A (Cold shock domain-containing protein A) (Single-strand DNA-binding protein NF-GMB)	CSDA
P17026	P17026_S49	0.469492	NA	P17026	ZNF22_HUMAN	Zinc finger protein 22 (Zinc finger protein KOX15) (Zinc finger protein Krox-26)	ZNF22
P17029	P17029_S13	-0.529666	NA	P17029	ZKSC1_HUMAN	Zinc finger protein with KRAB and SCAN domains 1 (Zinc finger protein 139) (Zinc finger protein 36) (Zinc finger protein KOX18)	ZKSCAN1
P17029	P17029_T10	NA	NA	P17029	ZKSC1_HUMAN	Zinc finger protein with KRAB and SCAN domains 1 (Zinc finger protein 139) (Zinc finger protein 36) (Zinc finger protein KOX18)	ZKSCAN1
P17096	P17096_S102	-0.815348	NA	P17096	HMGA1_HUMAN	High mobility group protein HMG-I/HMG-Y (HMG-I(Y)) (High mobility group AT-hook protein 1) (High mobility group protein A1) (High mobility group protein R)	HMGA1
P17096	P17096_S36	0.809119	NA	P17096	HMGA1_HUMAN	High mobility group protein HMG-I/HMG-Y (HMG-I(Y)) (High mobility group AT-hook protein 1) (High mobility group protein A1) (High mobility group protein R)	HMGA1
P17096	P17096_S4	0.385696	NA	P17096	HMGA1_HUMAN	High mobility group protein HMG-I/HMG-Y (HMG-I(Y)) (High mobility group AT-hook protein 1) (High mobility group protein A1) (High mobility group protein R)	HMGA1
P17096	P17096_T39	-1.75042	0.446218	P17096	HMGA1_HUMAN	High mobility group protein HMG-I/HMG-Y (HMG-I(Y)) (High mobility group AT-hook protein 1) (High mobility group protein A1) (High mobility group protein R)	HMGA1
P17275	P17275_S251	0.554446	NA	P17275	JUNB_HUMAN	Transcription factor jun-B	JUNB
P17275	P17275_S251,P17275_T255,P17275_S259	3.20339	NA	P17275	JUNB_HUMAN	Transcription factor jun-B	JUNB
P17275	P17275_T255,P17275_S259	0.316469	0.62408	P17275	JUNB_HUMAN	Transcription factor jun-B	JUNB
P17480	P17480_S484	1.18186	0.32417	P17480	UBF1_HUMAN	Nucleolar transcription factor 1 (Autoantigen NOR-90) (Upstream-binding factor 1) (UBF-1)	UBTF
P17483	P17483_S114	NA	NA	P17483	HXB4_HUMAN	Homeobox protein Hox-B4 (Homeobox protein Hox-2.6) (Homeobox protein Hox-2F)	HOXB4
P17509	P17509_S214	-0.899432	NA	P17509	HXB6_HUMAN	Homeobox protein Hox-B6 (Homeobox protein Hox-2.2) (Homeobox protein Hox-2B) (Homeobox protein Hu-2)	HOXB6
P17544	P17544_S434	-0.186727	NA	P17544	ATF7_HUMAN	Cyclic AMP-dependent transcription factor ATF-7 (cAMP-dependent transcription factor ATF-7) (Activating transcription factor 7) (Transcription factor ATF-A)	ATF7
P17600	P17600_S427	-0.171562	NA	P17600	SYN1_HUMAN	Synapsin-1 (Brain protein 4.1) (Synapsin I)	SYN1
P17612	P17612_S339	-1.62257	NA	P17612	KAPCA_HUMAN	cAMP-dependent protein kinase catalytic subunit alpha (PKA C-alpha) (EC 2.7.11.11)	PRKACA
P17612;P22694;P22612	P17612_T198,P22694_T198,P22612_T198	-2.44895	0.154513	P17612;P22612;P22694	KAPCA_HUMAN;KAPCG_HUMAN;KAPCB_HUMAN	cAMP-dependent protein kinase catalytic subunit alpha (PKA C-alpha) (EC 2.7.11.11);cAMP-dependent protein kinase catalytic subunit gamma (PKA C-gamma) (EC 2.7.11.11);cAMP-dependent protein kinase catalytic subunit beta (PKA C-beta) (EC 2.7.11.11)	PRKACA;PRKACG;PRKACB
P17812	P17812_S562	1.54105	0.323039	P17812	PYRG1_HUMAN	CTP synthase 1 (EC 6.3.4.2) (CTP synthetase 1) (UTP--ammonia ligase 1)	CTPS1
P17812	P17812_S571,P17812_S573	-0.638642	NA	P17812	PYRG1_HUMAN	CTP synthase 1 (EC 6.3.4.2) (CTP synthetase 1) (UTP--ammonia ligase 1)	CTPS1
P17812	P17812_S573,P17812_S574	-0.906961	NA	P17812	PYRG1_HUMAN	CTP synthase 1 (EC 6.3.4.2) (CTP synthetase 1) (UTP--ammonia ligase 1)	CTPS1
P17812	P17812_S574	NA	NA	P17812	PYRG1_HUMAN	CTP synthase 1 (EC 6.3.4.2) (CTP synthetase 1) (UTP--ammonia ligase 1)	CTPS1
P17812	P17812_S574,P17812_S575	-1.2317	NA	P17812	PYRG1_HUMAN	CTP synthase 1 (EC 6.3.4.2) (CTP synthetase 1) (UTP--ammonia ligase 1)	CTPS1
P17844	P17844_S2	2.07936	NA	P17844	DDX5_HUMAN	Probable ATP-dependent RNA helicase DDX5 (EC 3.6.4.13) (DEAD box protein 5) (RNA helicase p68)	DDX5
P17844	P17844_S6	1.67571	0.15839	P17844	DDX5_HUMAN	Probable ATP-dependent RNA helicase DDX5 (EC 3.6.4.13) (DEAD box protein 5) (RNA helicase p68)	DDX5
P17980	P17980_S9	-1.53425	NA	P17980	PRS6A_HUMAN	26S protease regulatory subunit 6A (26S proteasome AAA-ATPase subunit RPT5) (Proteasome 26S subunit ATPase 3) (Proteasome subunit P50) (Tat-binding protein 1) (TBP-1)	PSMC3
P18206	P18206_S290	-0.211147	NA	P18206	VINC_HUMAN	Vinculin (Metavinculin)	VCL
P18206	P18206_S345	1.40345	NA	P18206	VINC_HUMAN	Vinculin (Metavinculin)	VCL
P18206	P18206_S721	-1.94044	0.0257345	P18206	VINC_HUMAN	Vinculin (Metavinculin)	VCL
P18433	P18433_S213	-0.380405	NA	P18433	PTPRA_HUMAN	Receptor-type tyrosine-protein phosphatase alpha (Protein-tyrosine phosphatase alpha) (R-PTP-alpha) (EC 3.1.3.48)	PTPRA
P18583	P18583_S1697	-2.36495	NA	P18583	SON_HUMAN	Protein SON (Bax antagonist selected in saccharomyces 1) (BASS1) (Negative regulatory element-binding protein) (NRE-binding protein) (Protein DBP-5) (SON3)	SON
P18583	P18583_S1769	0.445389	0.821811	P18583	SON_HUMAN	Protein SON (Bax antagonist selected in saccharomyces 1) (BASS1) (Negative regulatory element-binding protein) (NRE-binding protein) (Protein DBP-5) (SON3)	SON
P18583	P18583_S1780	-1.85419	0.281946	P18583	SON_HUMAN	Protein SON (Bax antagonist selected in saccharomyces 1) (BASS1) (Negative regulatory element-binding protein) (NRE-binding protein) (Protein DBP-5) (SON3)	SON
P18583	P18583_S1780,P18583_S1782	-2.0109	NA	P18583	SON_HUMAN	Protein SON (Bax antagonist selected in saccharomyces 1) (BASS1) (Negative regulatory element-binding protein) (NRE-binding protein) (Protein DBP-5) (SON3)	SON
P18583	P18583_S1782,P18583_S1783	NA	NA	P18583	SON_HUMAN	Protein SON (Bax antagonist selected in saccharomyces 1) (BASS1) (Negative regulatory element-binding protein) (NRE-binding protein) (Protein DBP-5) (SON3)	SON
P18583	P18583_S1954	NA	NA	P18583	SON_HUMAN	Protein SON (Bax antagonist selected in saccharomyces 1) (BASS1) (Negative regulatory element-binding protein) (NRE-binding protein) (Protein DBP-5) (SON3)	SON
P18583	P18583_S2009,P18583_S2013	0.227992	0.871079	P18583	SON_HUMAN	Protein SON (Bax antagonist selected in saccharomyces 1) (BASS1) (Negative regulatory element-binding protein) (NRE-binding protein) (Protein DBP-5) (SON3)	SON
P18583	P18583_S2031	0.252955	NA	P18583	SON_HUMAN	Protein SON (Bax antagonist selected in saccharomyces 1) (BASS1) (Negative regulatory element-binding protein) (NRE-binding protein) (Protein DBP-5) (SON3)	SON
P18583	P18583_S283	1.82254	NA	P18583	SON_HUMAN	Protein SON (Bax antagonist selected in saccharomyces 1) (BASS1) (Negative regulatory element-binding protein) (NRE-binding protein) (Protein DBP-5) (SON3)	SON
P18583	P18583_T1549	0.081837	NA	P18583	SON_HUMAN	Protein SON (Bax antagonist selected in saccharomyces 1) (BASS1) (Negative regulatory element-binding protein) (NRE-binding protein) (Protein DBP-5) (SON3)	SON
P18583	P18583_T1555	-0.907299	0.370433	P18583	SON_HUMAN	Protein SON (Bax antagonist selected in saccharomyces 1) (BASS1) (Negative regulatory element-binding protein) (NRE-binding protein) (Protein DBP-5) (SON3)	SON
P18615	P18615_S115	-0.560007	0.0987256	P18615	NELFE_HUMAN	Negative elongation factor E (NELF-E) (RNA-binding protein RD)	RDBP
P18615	P18615_S165	1.4202	NA	P18615	NELFE_HUMAN	Negative elongation factor E (NELF-E) (RNA-binding protein RD)	RDBP
P18615	P18615_S179	1.58448	NA	P18615	NELFE_HUMAN	Negative elongation factor E (NELF-E) (RNA-binding protein RD)	RDBP
P18615	P18615_S181	-0.348711	0.657609	P18615	NELFE_HUMAN	Negative elongation factor E (NELF-E) (RNA-binding protein RD)	RDBP
P18615	P18615_S251	0.723202	0.599752	P18615	NELFE_HUMAN	Negative elongation factor E (NELF-E) (RNA-binding protein RD)	RDBP
P18615	P18615_S51	-2.41347	0.299473	P18615	NELFE_HUMAN	Negative elongation factor E (NELF-E) (RNA-binding protein RD)	RDBP
P18669;Q8N0Y7	P18669_S118,Q8N0Y7_S118	NA	NA	P18669;Q8N0Y7	PGAM1_HUMAN;PGAM4_HUMAN	Phosphoglycerate mutase 1 (EC 3.1.3.13) (EC 5.4.2.1) (EC 5.4.2.4) (BPG-dependent PGAM 1) (Phosphoglycerate mutase isozyme B) (PGAM-B);Probable phosphoglycerate mutase 4 (EC 3.1.3.13) (EC 5.4.2.1) (EC 5.4.2.4)	PGAM1;PGAM4
P18754	P18754_S11	0.0455504	0.929061	P18754	RCC1_HUMAN	Regulator of chromosome condensation (Cell cycle regulatory protein) (Chromosome condensation protein 1)	RCC1
P18858	P18858_S141	-0.0199992	0.977735	P18858	DNLI1_HUMAN	DNA ligase 1 (EC 6.5.1.1) (DNA ligase I) (Polydeoxyribonucleotide synthase [ATP] 1)	LIG1
P18858	P18858_S49	-1.14027	NA	P18858	DNLI1_HUMAN	DNA ligase 1 (EC 6.5.1.1) (DNA ligase I) (Polydeoxyribonucleotide synthase [ATP] 1)	LIG1
P18858	P18858_S66	-1.10213	0.11528	P18858	DNLI1_HUMAN	DNA ligase 1 (EC 6.5.1.1) (DNA ligase I) (Polydeoxyribonucleotide synthase [ATP] 1)	LIG1
P18858	P18858_S66,P18858_S76	-0.975807	NA	P18858	DNLI1_HUMAN	DNA ligase 1 (EC 6.5.1.1) (DNA ligase I) (Polydeoxyribonucleotide synthase [ATP] 1)	LIG1
P18858	P18858_S76	-0.744778	0.331396	P18858	DNLI1_HUMAN	DNA ligase 1 (EC 6.5.1.1) (DNA ligase I) (Polydeoxyribonucleotide synthase [ATP] 1)	LIG1
P18858	P18858_T182	-0.276549	0.143623	P18858	DNLI1_HUMAN	DNA ligase 1 (EC 6.5.1.1) (DNA ligase I) (Polydeoxyribonucleotide synthase [ATP] 1)	LIG1
P18858	P18858_T183	-1.36219	0.208411	P18858	DNLI1_HUMAN	DNA ligase 1 (EC 6.5.1.1) (DNA ligase I) (Polydeoxyribonucleotide synthase [ATP] 1)	LIG1
P18858	P18858_T195	-0.582613	0.326508	P18858	DNLI1_HUMAN	DNA ligase 1 (EC 6.5.1.1) (DNA ligase I) (Polydeoxyribonucleotide synthase [ATP] 1)	LIG1
P18858	P18858_T195,P18858_S201	-0.687362	0.166515	P18858	DNLI1_HUMAN	DNA ligase 1 (EC 6.5.1.1) (DNA ligase I) (Polydeoxyribonucleotide synthase [ATP] 1)	LIG1
P18887	P18887_S241	1.48939	0.233498	P18887	XRCC1_HUMAN	DNA repair protein XRCC1 (X-ray repair cross-complementing protein 1)	XRCC1
P18887	P18887_S446,P18887_T453	-0.300901	NA	P18887	XRCC1_HUMAN	DNA repair protein XRCC1 (X-ray repair cross-complementing protein 1)	XRCC1
P18887	P18887_S447	0.0379626	NA	P18887	XRCC1_HUMAN	DNA repair protein XRCC1 (X-ray repair cross-complementing protein 1)	XRCC1
P18887	P18887_S447,P18887_T453	-0.433471	0.620749	P18887	XRCC1_HUMAN	DNA repair protein XRCC1 (X-ray repair cross-complementing protein 1)	XRCC1
P18887	P18887_T198	-4.17049	NA	P18887	XRCC1_HUMAN	DNA repair protein XRCC1 (X-ray repair cross-complementing protein 1)	XRCC1
P19174	P19174_S1233	-0.0964144	NA	P19174	PLCG1_HUMAN	1-phosphatidylinositol 4,5-bisphosphate phosphodiesterase gamma-1 (EC 3.1.4.11) (PLC-148) (Phosphoinositide phospholipase C-gamma-1) (Phospholipase C-II) (PLC-II) (Phospholipase C-gamma-1) (PLC-gamma-1)	PLCG1
P19174	P19174_S1248	0.336381	0.374218	P19174	PLCG1_HUMAN	1-phosphatidylinositol 4,5-bisphosphate phosphodiesterase gamma-1 (EC 3.1.4.11) (PLC-148) (Phosphoinositide phospholipase C-gamma-1) (Phospholipase C-II) (PLC-II) (Phospholipase C-gamma-1) (PLC-gamma-1)	PLCG1
P19174	P19174_S1263	-2.38424	0.13534	P19174	PLCG1_HUMAN	1-phosphatidylinositol 4,5-bisphosphate phosphodiesterase gamma-1 (EC 3.1.4.11) (PLC-148) (Phosphoinositide phospholipase C-gamma-1) (Phospholipase C-II) (PLC-II) (Phospholipase C-gamma-1) (PLC-gamma-1)	PLCG1
P19338	P19338_S563	-0.256902	0.697458	P19338	NUCL_HUMAN	Nucleolin (Protein C23)	NCL
P19338	P19338_S580	-0.50834	NA	P19338	NUCL_HUMAN	Nucleolin (Protein C23)	NCL
P19338	P19338_S67	0.854221	0.298036	P19338	NUCL_HUMAN	Nucleolin (Protein C23)	NCL
P19338	P19338_T106	3.25226	0.144787	P19338	NUCL_HUMAN	Nucleolin (Protein C23)	NCL
P19338	P19338_T121	1.97233	NA	P19338	NUCL_HUMAN	Nucleolin (Protein C23)	NCL
P19338	P19338_T99	0.630548	0.574402	P19338	NUCL_HUMAN	Nucleolin (Protein C23)	NCL
P19338	P19338_T99,P19338_T106	1.20432	0.0238941	P19338	NUCL_HUMAN	Nucleolin (Protein C23)	NCL
P19419	P19419_S324	-1.07546	NA	P19419	ELK1_HUMAN	ETS domain-containing protein Elk-1	ELK1
P19484	P19484_S466	-0.0343401	0.976329	P19484	TFEB_HUMAN	Transcription factor EB (Class E basic helix-loop-helix protein 35) (bHLHe35)	TFEB
P19525	P19525_S83	-1.25125	NA	P19525	E2AK2_HUMAN	Interferon-induced, double-stranded RNA-activated protein kinase (EC 2.7.11.1) (Eukaryotic translation initiation factor 2-alpha kinase 2) (eIF-2A protein kinase 2) (Interferon-inducible RNA-dependent protein kinase) (P1/eIF-2A protein kinase) (Protein kinase RNA-activated) (PKR) (Tyrosine-protein kinase EIF2AK2) (EC 2.7.10.2) (p68 kinase)	EIF2AK2
P19532	P19532_S556	-1.77	0.0988332	P19532	TFE3_HUMAN	Transcription factor E3 (Class E basic helix-loop-helix protein 33) (bHLHe33)	TFE3
P19532	P19532_S567	0.056803	NA	P19532	TFE3_HUMAN	Transcription factor E3 (Class E basic helix-loop-helix protein 33) (bHLHe33)	TFE3
P19532	P19532_S568	NA	NA	P19532	TFE3_HUMAN	Transcription factor E3 (Class E basic helix-loop-helix protein 33) (bHLHe33)	TFE3
P19634	P19634_S693	-1.58138	0.498442	P19634	SL9A1_HUMAN	Sodium/hydrogen exchanger 1 (APNH) (Na(+)/H(+) antiporter, amiloride-sensitive) (Na(+)/H(+) exchanger 1) (NHE-1) (Solute carrier family 9 member 1)	SLC9A1
P19634	P19634_S703	-0.943299	NA	P19634	SL9A1_HUMAN	Sodium/hydrogen exchanger 1 (APNH) (Na(+)/H(+) antiporter, amiloride-sensitive) (Na(+)/H(+) exchanger 1) (NHE-1) (Solute carrier family 9 member 1)	SLC9A1
P19634	P19634_S785	1.93328	0.340601	P19634	SL9A1_HUMAN	Sodium/hydrogen exchanger 1 (APNH) (Na(+)/H(+) antiporter, amiloride-sensitive) (Na(+)/H(+) exchanger 1) (NHE-1) (Solute carrier family 9 member 1)	SLC9A1
P19634	P19634_S796	-2.76089	NA	P19634	SL9A1_HUMAN	Sodium/hydrogen exchanger 1 (APNH) (Na(+)/H(+) antiporter, amiloride-sensitive) (Na(+)/H(+) exchanger 1) (NHE-1) (Solute carrier family 9 member 1)	SLC9A1
P19838	P19838_S937	-3.97796	NA	P19838	NFKB1_HUMAN	Nuclear factor NF-kappa-B p105 subunit (DNA-binding factor KBF1) (EBP-1) (Nuclear factor of kappa light polypeptide gene enhancer in B-cells 1) [Cleaved into: Nuclear factor NF-kappa-B p50 subunit]	NFKB1
P20020	P20020_S1215,P20020_S1216	-0.943703	0.64155	P20020	AT2B1_HUMAN	Plasma membrane calcium-transporting ATPase 1 (PMCA1) (EC 3.6.3.8) (Plasma membrane calcium ATPase isoform 1) (Plasma membrane calcium pump isoform 1)	ATP2B1
P20020	P20020_S1215,P20020_S1220	-0.512783	NA	P20020	AT2B1_HUMAN	Plasma membrane calcium-transporting ATPase 1 (PMCA1) (EC 3.6.3.8) (Plasma membrane calcium ATPase isoform 1) (Plasma membrane calcium pump isoform 1)	ATP2B1
P20042	P20042_S2	0.899156	0.799945	P20042	IF2B_HUMAN	Eukaryotic translation initiation factor 2 subunit 2 (Eukaryotic translation initiation factor 2 subunit beta) (eIF-2-beta)	EIF2S2
P20645	P20645_S267	-0.324041	0.635545	P20645	MPRD_HUMAN	Cation-dependent mannose-6-phosphate receptor (CD Man-6-P receptor) (CD-MPR) (46 kDa mannose 6-phosphate receptor) (MPR 46)	M6PR
P20700	P20700_S23	-0.471515	0.368765	P20700	LMNB1_HUMAN	Lamin-B1	LMNB1
P20700	P20700_T575	NA	NA	P20700	LMNB1_HUMAN	Lamin-B1	LMNB1
P20700;Q03252	P20700_S391,P20700_S393,Q03252_S385,Q03252_S387	0.187221	0.674419	P20700;Q03252	LMNB1_HUMAN;LMNB2_HUMAN	Lamin-B1;Lamin-B2	LMNB1;LMNB2
P20700;Q03252	P20700_S391,Q03252_S385	-1.38608	0.184236	P20700;Q03252	LMNB1_HUMAN;LMNB2_HUMAN	Lamin-B1;Lamin-B2	LMNB1;LMNB2
P20700;Q03252	P20700_S393,Q03252_S387	-2.58843	0.387139	P20700;Q03252	LMNB1_HUMAN;LMNB2_HUMAN	Lamin-B1;Lamin-B2	LMNB1;LMNB2
P20810	P20810_S133	1.41042	0.108478	P20810	ICAL_HUMAN	Calpastatin (Calpain inhibitor) (Sperm BS-17 component)	CAST
P20810	P20810_S243	-3.38392	NA	P20810	ICAL_HUMAN	Calpastatin (Calpain inhibitor) (Sperm BS-17 component)	CAST
P20810	P20810_S366	-1.5667	0.590474	P20810	ICAL_HUMAN	Calpastatin (Calpain inhibitor) (Sperm BS-17 component)	CAST
P20810	P20810_S373	-1.21035	NA	P20810	ICAL_HUMAN	Calpastatin (Calpain inhibitor) (Sperm BS-17 component)	CAST
P20810	P20810_S71	2.41496	0.230699	P20810	ICAL_HUMAN	Calpastatin (Calpain inhibitor) (Sperm BS-17 component)	CAST
P20810	P20810_T135	1.44961	NA	P20810	ICAL_HUMAN	Calpastatin (Calpain inhibitor) (Sperm BS-17 component)	CAST
P20962	P20962_S13	-1.18486	0.104002	P20962	PTMS_HUMAN	Parathymosin	PTMS
P20962	P20962_S2	-0.322601	0.831609	P20962	PTMS_HUMAN	Parathymosin	PTMS
P20962	P20962_S5	0.812606	NA	P20962	PTMS_HUMAN	Parathymosin	PTMS
P21127	P21127_S65	-1.05405	0.177097	P21127	CD11B_HUMAN	Cyclin-dependent kinase 11B (EC 2.7.11.22) (Cell division cycle 2-like protein kinase 1) (CLK-1) (Cell division protein kinase 11B) (Galactosyltransferase-associated protein kinase p58/GTA) (PITSLRE serine/threonine-protein kinase CDC2L1) (p58 CLK-1)	CDK11B
P21127	P21127_T61	-3.02731	NA	P21127	CD11B_HUMAN	Cyclin-dependent kinase 11B (EC 2.7.11.22) (Cell division cycle 2-like protein kinase 1) (CLK-1) (Cell division protein kinase 11B) (Galactosyltransferase-associated protein kinase p58/GTA) (PITSLRE serine/threonine-protein kinase CDC2L1) (p58 CLK-1)	CDK11B
P21127;Q9UQ88	P21127_S229,Q9UQ88_S217	1.35208	NA	P21127;Q9UQ88	CD11B_HUMAN;CD11A_HUMAN	Cyclin-dependent kinase 11B (EC 2.7.11.22) (Cell division cycle 2-like protein kinase 1) (CLK-1) (Cell division protein kinase 11B) (Galactosyltransferase-associated protein kinase p58/GTA) (PITSLRE serine/threonine-protein kinase CDC2L1) (p58 CLK-1);Cyclin-dependent kinase 11A (EC 2.7.11.22) (Cell division cycle 2-like protein kinase 2) (Cell division protein kinase 11A) (Galactosyltransferase-a…	CDK11B;CDK11A
P21127;Q9UQ88	P21127_S232,Q9UQ88_S220	1.12106	0.285812	P21127;Q9UQ88	CD11B_HUMAN;CD11A_HUMAN	Cyclin-dependent kinase 11B (EC 2.7.11.22) (Cell division cycle 2-like protein kinase 1) (CLK-1) (Cell division protein kinase 11B) (Galactosyltransferase-associated protein kinase p58/GTA) (PITSLRE serine/threonine-protein kinase CDC2L1) (p58 CLK-1);Cyclin-dependent kinase 11A (EC 2.7.11.22) (Cell division cycle 2-like protein kinase 2) (Cell division protein kinase 11A) (Galactosyltransferase-a…	CDK11B;CDK11A
P21127;Q9UQ88	P21127_S234,Q9UQ88_S222	-2.10468	0.486682	P21127;Q9UQ88	CD11B_HUMAN;CD11A_HUMAN	Cyclin-dependent kinase 11B (EC 2.7.11.22) (Cell division cycle 2-like protein kinase 1) (CLK-1) (Cell division protein kinase 11B) (Galactosyltransferase-associated protein kinase p58/GTA) (PITSLRE serine/threonine-protein kinase CDC2L1) (p58 CLK-1);Cyclin-dependent kinase 11A (EC 2.7.11.22) (Cell division cycle 2-like protein kinase 2) (Cell division protein kinase 11A) (Galactosyltransferase-a…	CDK11B;CDK11A
P21127;Q9UQ88	P21127_S47,Q9UQ88_S47	-0.161675	0.390431	P21127;Q9UQ88	CD11B_HUMAN;CD11A_HUMAN	Cyclin-dependent kinase 11B (EC 2.7.11.22) (Cell division cycle 2-like protein kinase 1) (CLK-1) (Cell division protein kinase 11B) (Galactosyltransferase-associated protein kinase p58/GTA) (PITSLRE serine/threonine-protein kinase CDC2L1) (p58 CLK-1);Cyclin-dependent kinase 11A (EC 2.7.11.22) (Cell division cycle 2-like protein kinase 2) (Cell division protein kinase 11A) (Galactosyltransferase-a…	CDK11B;CDK11A
P21127;Q9UQ88	P21127_S752,Q9UQ88_S740	-0.594428	0.128091	P21127;Q9UQ88	CD11B_HUMAN;CD11A_HUMAN	Cyclin-dependent kinase 11B (EC 2.7.11.22) (Cell division cycle 2-like protein kinase 1) (CLK-1) (Cell division protein kinase 11B) (Galactosyltransferase-associated protein kinase p58/GTA) (PITSLRE serine/threonine-protein kinase CDC2L1) (p58 CLK-1);Cyclin-dependent kinase 11A (EC 2.7.11.22) (Cell division cycle 2-like protein kinase 2) (Cell division protein kinase 11A) (Galactosyltransferase-a…	CDK11B;CDK11A
P21127;Q9UQ88;Q9UKB5	P21127_S234,Q9UQ88_S222,Q9UKB5_S56	1.37192	0.288239	P21127;Q9UKB5;Q9UQ88	CD11B_HUMAN;AJAP1_HUMAN;CD11A_HUMAN	Cyclin-dependent kinase 11B (EC 2.7.11.22) (Cell division cycle 2-like protein kinase 1) (CLK-1) (Cell division protein kinase 11B) (Galactosyltransferase-associated protein kinase p58/GTA) (PITSLRE serine/threonine-protein kinase CDC2L1) (p58 CLK-1);Adherens junction-associated protein 1 (Membrane protein shrew-1);Cyclin-dependent kinase 11A (EC 2.7.11.22) (Cell division cycle 2-like protein kin…	CDK11B;AJAP1;CDK11A
P21291	P21291_S192	0.474319	0.753154	P21291	CSRP1_HUMAN	Cysteine and glycine-rich protein 1 (Cysteine-rich protein 1) (CRP) (CRP1)	CSRP1
P21333	P21333_S1084	-1.2842	0.0822583	P21333	FLNA_HUMAN	Filamin-A (FLN-A) (Actin-binding protein 280) (ABP-280) (Alpha-filamin) (Endothelial actin-binding protein) (Filamin-1) (Non-muscle filamin)	FLNA
P21333	P21333_S1459	-0.30038	0.786763	P21333	FLNA_HUMAN	Filamin-A (FLN-A) (Actin-binding protein 280) (ABP-280) (Alpha-filamin) (Endothelial actin-binding protein) (Filamin-1) (Non-muscle filamin)	FLNA
P21333	P21333_S2152	-1.27428	0.376068	P21333	FLNA_HUMAN	Filamin-A (FLN-A) (Actin-binding protein 280) (ABP-280) (Alpha-filamin) (Endothelial actin-binding protein) (Filamin-1) (Non-muscle filamin)	FLNA
P21333	P21333_S2284	0.240095	NA	P21333	FLNA_HUMAN	Filamin-A (FLN-A) (Actin-binding protein 280) (ABP-280) (Alpha-filamin) (Endothelial actin-binding protein) (Filamin-1) (Non-muscle filamin)	FLNA
P21333	P21333_S2327	-5.09021	NA	P21333	FLNA_HUMAN	Filamin-A (FLN-A) (Actin-binding protein 280) (ABP-280) (Alpha-filamin) (Endothelial actin-binding protein) (Filamin-1) (Non-muscle filamin)	FLNA
P21333	P21333_S2523	-0.468184	0.479564	P21333	FLNA_HUMAN	Filamin-A (FLN-A) (Actin-binding protein 280) (ABP-280) (Alpha-filamin) (Endothelial actin-binding protein) (Filamin-1) (Non-muscle filamin)	FLNA
P21333	P21333_T2336	-0.69862	0.67365	P21333	FLNA_HUMAN	Filamin-A (FLN-A) (Actin-binding protein 280) (ABP-280) (Alpha-filamin) (Endothelial actin-binding protein) (Filamin-1) (Non-muscle filamin)	FLNA
P21359	P21359_S2543	-0.976537	0.174296	P21359	NF1_HUMAN	Neurofibromin (Neurofibromatosis-related protein NF-1) [Cleaved into: Neurofibromin truncated]	NF1
P21359	P21359_S2802	-0.59031	NA	P21359	NF1_HUMAN	Neurofibromin (Neurofibromatosis-related protein NF-1) [Cleaved into: Neurofibromin truncated]	NF1
P21359	P21359_S2829	2.27074	NA	P21359	NF1_HUMAN	Neurofibromin (Neurofibromatosis-related protein NF-1) [Cleaved into: Neurofibromin truncated]	NF1
P21359	P21359_T2514	-1.69915	0.275249	P21359	NF1_HUMAN	Neurofibromin (Neurofibromatosis-related protein NF-1) [Cleaved into: Neurofibromin truncated]	NF1
P21796	P21796_S104	-1.86578	0.0933091	P21796	VDAC1_HUMAN	Voltage-dependent anion-selective channel protein 1 (VDAC-1) (hVDAC1) (Outer mitochondrial membrane protein porin 1) (Plasmalemmal porin) (Porin 31HL) (Porin 31HM)	VDAC1
P21796	P21796_Y62,P21796_T70	-0.0753356	NA	P21796	VDAC1_HUMAN	Voltage-dependent anion-selective channel protein 1 (VDAC-1) (hVDAC1) (Outer mitochondrial membrane protein porin 1) (Plasmalemmal porin) (Porin 31HL) (Porin 31HM)	VDAC1
P22059	P22059_S190	-0.700884	NA	P22059	OSBP1_HUMAN	Oxysterol-binding protein 1	OSBP
P22059	P22059_S190,P22059_S193	0.31958	NA	P22059	OSBP1_HUMAN	Oxysterol-binding protein 1	OSBP
P22059	P22059_S240	-0.817745	0.540884	P22059	OSBP1_HUMAN	Oxysterol-binding protein 1	OSBP
P22059	P22059_S379	-0.831653	NA	P22059	OSBP1_HUMAN	Oxysterol-binding protein 1	OSBP
P22059	P22059_S379,P22059_S382	1.15061	0.564907	P22059	OSBP1_HUMAN	Oxysterol-binding protein 1	OSBP
P22059	P22059_S379,P22059_S382,P22059_S385	1.28032	0.668759	P22059	OSBP1_HUMAN	Oxysterol-binding protein 1	OSBP
P22059	P22059_S382,P22059_S385	NA	NA	P22059	OSBP1_HUMAN	Oxysterol-binding protein 1	OSBP
P22059	P22059_T377	0.14778	0.838865	P22059	OSBP1_HUMAN	Oxysterol-binding protein 1	OSBP
P22059	P22059_T377,P22059_S379	NA	NA	P22059	OSBP1_HUMAN	Oxysterol-binding protein 1	OSBP
P22087	P22087_S124	-0.775555	0.26904	P22087	FBRL_HUMAN	rRNA 2'-O-methyltransferase fibrillarin (EC 2.1.1.-) (34 kDa nucleolar scleroderma antigen)	FBL
P22234	P22234_S27	-0.374639	0.857846	P22234	PUR6_HUMAN	Multifunctional protein ADE2 [Includes: Phosphoribosylaminoimidazole-succinocarboxamide synthase (EC 6.3.2.6) (SAICAR synthetase); Phosphoribosylaminoimidazole carboxylase (EC 4.1.1.21) (AIR carboxylase) (AIRC)]	PAICS
P22314	P22314_S13	-3.39028	0.0198197	P22314	UBA1_HUMAN	Ubiquitin-like modifier-activating enzyme 1 (Protein A1S9) (Ubiquitin-activating enzyme E1)	UBA1
P22314	P22314_S13,P22314_S21	0.0815786	NA	P22314	UBA1_HUMAN	Ubiquitin-like modifier-activating enzyme 1 (Protein A1S9) (Ubiquitin-activating enzyme E1)	UBA1
P22314	P22314_S13,P22314_S24	NA	NA	P22314	UBA1_HUMAN	Ubiquitin-like modifier-activating enzyme 1 (Protein A1S9) (Ubiquitin-activating enzyme E1)	UBA1
P22314	P22314_S4	1.10009	0.409654	P22314	UBA1_HUMAN	Ubiquitin-like modifier-activating enzyme 1 (Protein A1S9) (Ubiquitin-activating enzyme E1)	UBA1
P22314	P22314_S46	-0.60391	0.219265	P22314	UBA1_HUMAN	Ubiquitin-like modifier-activating enzyme 1 (Protein A1S9) (Ubiquitin-activating enzyme E1)	UBA1
P22314	P22314_S810	NA	NA	P22314	UBA1_HUMAN	Ubiquitin-like modifier-activating enzyme 1 (Protein A1S9) (Ubiquitin-activating enzyme E1)	UBA1
P22626	P22626_S259	0.271754	NA	P22626	ROA2_HUMAN	Heterogeneous nuclear ribonucleoproteins A2/B1 (hnRNP A2/B1)	HNRNPA2B1
P22670	P22670_S117	NA	NA	P22670	RFX1_HUMAN	MHC class II regulatory factor RFX1 (Enhancer factor C) (EF-C) (Regulatory factor X 1) (RFX) (Transcription factor RFX1)	RFX1
P22670	P22670_S204	-0.674171	0.246343	P22670	RFX1_HUMAN	MHC class II regulatory factor RFX1 (Enhancer factor C) (EF-C) (Regulatory factor X 1) (RFX) (Transcription factor RFX1)	RFX1
P22674	P22674_S81	0.522834	NA	P22674	CCNO_HUMAN	Cyclin-O	CCNO
P22681	P22681_S452	-1.54292	NA	P22681	CBL_HUMAN	E3 ubiquitin-protein ligase CBL (EC 6.3.2.-) (Casitas B-lineage lymphoma proto-oncogene) (Proto-oncogene c-Cbl) (RING finger protein 55) (Signal transduction protein CBL)	CBL
P22681	P22681_S483	-1.36032	0.402836	P22681	CBL_HUMAN	E3 ubiquitin-protein ligase CBL (EC 6.3.2.-) (Casitas B-lineage lymphoma proto-oncogene) (Proto-oncogene c-Cbl) (RING finger protein 55) (Signal transduction protein CBL)	CBL
P22681	P22681_S619	-0.794418	0.752953	P22681	CBL_HUMAN	E3 ubiquitin-protein ligase CBL (EC 6.3.2.-) (Casitas B-lineage lymphoma proto-oncogene) (Proto-oncogene c-Cbl) (RING finger protein 55) (Signal transduction protein CBL)	CBL
P22681	P22681_S669	NA	NA	P22681	CBL_HUMAN	E3 ubiquitin-protein ligase CBL (EC 6.3.2.-) (Casitas B-lineage lymphoma proto-oncogene) (Proto-oncogene c-Cbl) (RING finger protein 55) (Signal transduction protein CBL)	CBL
P22681	P22681_T789	NA	NA	P22681	CBL_HUMAN	E3 ubiquitin-protein ligase CBL (EC 6.3.2.-) (Casitas B-lineage lymphoma proto-oncogene) (Proto-oncogene c-Cbl) (RING finger protein 55) (Signal transduction protein CBL)	CBL
P23193	P23193_S100	0.688833	0.488771	P23193	TCEA1_HUMAN	Transcription elongation factor A protein 1 (Transcription elongation factor S-II protein 1) (Transcription elongation factor TFIIS.o)	TCEA1
P23193	P23193_S57	-0.0331479	0.944479	P23193	TCEA1_HUMAN	Transcription elongation factor A protein 1 (Transcription elongation factor S-II protein 1) (Transcription elongation factor TFIIS.o)	TCEA1
P23381	P23381_S4	2.41202	NA	P23381	SYWC_HUMAN	Tryptophan--tRNA ligase, cytoplasmic (EC 6.1.1.2) (Interferon-induced protein 53) (IFP53) (Tryptophanyl-tRNA synthetase) (TrpRS) (hWRS) [Cleaved into: T1-TrpRS; T2-TrpRS]	WARS
P23381	P23381_S467	4.05575	0.138322	P23381	SYWC_HUMAN	Tryptophan--tRNA ligase, cytoplasmic (EC 6.1.1.2) (Interferon-induced protein 53) (IFP53) (Tryptophanyl-tRNA synthetase) (TrpRS) (hWRS) [Cleaved into: T1-TrpRS; T2-TrpRS]	WARS
P23396	P23396_T221	-0.81855	NA	P23396	RS3_HUMAN	40S ribosomal protein S3	RPS3
P23443	P23443_S441	-0.293661	NA	P23443	KS6B1_HUMAN	Ribosomal protein S6 kinase beta-1 (S6K-beta-1) (S6K1) (EC 2.7.11.1) (70 kDa ribosomal protein S6 kinase 1) (P70S6K1) (p70-S6K 1) (Ribosomal protein S6 kinase I) (Serine/threonine-protein kinase 14A) (p70 ribosomal S6 kinase alpha) (p70 S6 kinase alpha) (p70 S6K-alpha) (p70 S6KA)	RPS6KB1
P23443	P23443_S447	0.191662	NA	P23443	KS6B1_HUMAN	Ribosomal protein S6 kinase beta-1 (S6K-beta-1) (S6K1) (EC 2.7.11.1) (70 kDa ribosomal protein S6 kinase 1) (P70S6K1) (p70-S6K 1) (Ribosomal protein S6 kinase I) (Serine/threonine-protein kinase 14A) (p70 ribosomal S6 kinase alpha) (p70 S6 kinase alpha) (p70 S6K-alpha) (p70 S6KA)	RPS6KB1
P23443	P23443_T444	-1.13557	NA	P23443	KS6B1_HUMAN	Ribosomal protein S6 kinase beta-1 (S6K-beta-1) (S6K1) (EC 2.7.11.1) (70 kDa ribosomal protein S6 kinase 1) (P70S6K1) (p70-S6K 1) (Ribosomal protein S6 kinase I) (Serine/threonine-protein kinase 14A) (p70 ribosomal S6 kinase alpha) (p70 S6 kinase alpha) (p70 S6K-alpha) (p70 S6KA)	RPS6KB1
P23497	P23497_S171	0.727933	NA	P23497	SP100_HUMAN	Nuclear autoantigen Sp-100 (Lysp100b) (Nuclear dot-associated Sp100 protein) (Speckled 100 kDa)	SP100
P23497	P23497_S362	-0.559751	NA	P23497	SP100_HUMAN	Nuclear autoantigen Sp-100 (Lysp100b) (Nuclear dot-associated Sp100 protein) (Speckled 100 kDa)	SP100
P23497	P23497_S409,P23497_S410	0.47859	NA	P23497	SP100_HUMAN	Nuclear autoantigen Sp-100 (Lysp100b) (Nuclear dot-associated Sp100 protein) (Speckled 100 kDa)	SP100
P23497	P23497_S451	NA	NA	P23497	SP100_HUMAN	Nuclear autoantigen Sp-100 (Lysp100b) (Nuclear dot-associated Sp100 protein) (Speckled 100 kDa)	SP100
P23528	P23528_S156	-0.879746	0.624754	P23528	COF1_HUMAN	Cofilin-1 (18 kDa phosphoprotein) (p18) (Cofilin, non-muscle isoform)	CFL1
P23528	P23528_S24	4.97844	NA	P23528	COF1_HUMAN	Cofilin-1 (18 kDa phosphoprotein) (p18) (Cofilin, non-muscle isoform)	CFL1
P23528	P23528_S3	-1.05074	0.60337	P23528	COF1_HUMAN	Cofilin-1 (18 kDa phosphoprotein) (p18) (Cofilin, non-muscle isoform)	CFL1
P23588	P23588_S406	1.02233	0.490407	P23588	IF4B_HUMAN	Eukaryotic translation initiation factor 4B (eIF-4B)	EIF4B
P23588	P23588_S406,P23588_S409	NA	NA	P23588	IF4B_HUMAN	Eukaryotic translation initiation factor 4B (eIF-4B)	EIF4B
P23588	P23588_S418	5.72816	NA	P23588	IF4B_HUMAN	Eukaryotic translation initiation factor 4B (eIF-4B)	EIF4B
P23588	P23588_S418,P23588_S422	NA	NA	P23588	IF4B_HUMAN	Eukaryotic translation initiation factor 4B (eIF-4B)	EIF4B
P23588	P23588_S418,P23588_S424	-0.0837212	NA	P23588	IF4B_HUMAN	Eukaryotic translation initiation factor 4B (eIF-4B)	EIF4B
P23588	P23588_S418,P23588_T420	3.45138	NA	P23588	IF4B_HUMAN	Eukaryotic translation initiation factor 4B (eIF-4B)	EIF4B
P23588	P23588_S418,P23588_T420,P23588_S422	1.12759	NA	P23588	IF4B_HUMAN	Eukaryotic translation initiation factor 4B (eIF-4B)	EIF4B
P23588	P23588_S422	1.58289	0.421169	P23588	IF4B_HUMAN	Eukaryotic translation initiation factor 4B (eIF-4B)	EIF4B
P23588	P23588_S422,P23588_S425	0.26441	0.860865	P23588	IF4B_HUMAN	Eukaryotic translation initiation factor 4B (eIF-4B)	EIF4B
P23588	P23588_S424	-0.986454	NA	P23588	IF4B_HUMAN	Eukaryotic translation initiation factor 4B (eIF-4B)	EIF4B
P23588	P23588_S425	0.113179	NA	P23588	IF4B_HUMAN	Eukaryotic translation initiation factor 4B (eIF-4B)	EIF4B
P23588	P23588_S442,P23588_S445	-0.534608	0.172609	P23588	IF4B_HUMAN	Eukaryotic translation initiation factor 4B (eIF-4B)	EIF4B
P23588	P23588_S442,P23588_T450	-0.0549171	NA	P23588	IF4B_HUMAN	Eukaryotic translation initiation factor 4B (eIF-4B)	EIF4B
P23588	P23588_S445	0.239705	0.51824	P23588	IF4B_HUMAN	Eukaryotic translation initiation factor 4B (eIF-4B)	EIF4B
P23588	P23588_S459	0.289131	NA	P23588	IF4B_HUMAN	Eukaryotic translation initiation factor 4B (eIF-4B)	EIF4B
P23588	P23588_S495	NA	NA	P23588	IF4B_HUMAN	Eukaryotic translation initiation factor 4B (eIF-4B)	EIF4B
P23588	P23588_S495,P23588_S497	0.265408	NA	P23588	IF4B_HUMAN	Eukaryotic translation initiation factor 4B (eIF-4B)	EIF4B
P23588	P23588_S497	1.37139	0.00337117	P23588	IF4B_HUMAN	Eukaryotic translation initiation factor 4B (eIF-4B)	EIF4B
P23588	P23588_S497,P23588_S498	-0.0632507	0.966206	P23588	IF4B_HUMAN	Eukaryotic translation initiation factor 4B (eIF-4B)	EIF4B
P23588	P23588_S498	0.869894	0.591234	P23588	IF4B_HUMAN	Eukaryotic translation initiation factor 4B (eIF-4B)	EIF4B
P23588	P23588_S498,P23588_S504	1.54034	0.405595	P23588	IF4B_HUMAN	Eukaryotic translation initiation factor 4B (eIF-4B)	EIF4B
P23588	P23588_S504	-0.711405	0.764909	P23588	IF4B_HUMAN	Eukaryotic translation initiation factor 4B (eIF-4B)	EIF4B
P23588	P23588_S597	-0.465158	NA	P23588	IF4B_HUMAN	Eukaryotic translation initiation factor 4B (eIF-4B)	EIF4B
P23588	P23588_S93	-0.460746	NA	P23588	IF4B_HUMAN	Eukaryotic translation initiation factor 4B (eIF-4B)	EIF4B
P23588	P23588_T420	-0.377454	0.573718	P23588	IF4B_HUMAN	Eukaryotic translation initiation factor 4B (eIF-4B)	EIF4B
P23588	P23588_T420,P23588_S422	4.48201	0.0512135	P23588	IF4B_HUMAN	Eukaryotic translation initiation factor 4B (eIF-4B)	EIF4B
P23588	P23588_T420,P23588_S424	5.34234	0.11483	P23588	IF4B_HUMAN	Eukaryotic translation initiation factor 4B (eIF-4B)	EIF4B
P23588	P23588_T500	NA	NA	P23588	IF4B_HUMAN	Eukaryotic translation initiation factor 4B (eIF-4B)	EIF4B
P23588	P23588_T500,P23588_S504	-1.20629	NA	P23588	IF4B_HUMAN	Eukaryotic translation initiation factor 4B (eIF-4B)	EIF4B
P24534	P24534_S90	NA	NA	P24534	EF1B_HUMAN	Elongation factor 1-beta (EF-1-beta)	EEF1B2
P24534	P24534_S95	0.42269	NA	P24534	EF1B_HUMAN	Elongation factor 1-beta (EF-1-beta)	EEF1B2
P24588	P24588_S178	-0.616535	NA	P24588	AKAP5_HUMAN	A-kinase anchor protein 5 (AKAP-5) (A-kinase anchor protein 79 kDa) (AKAP 79) (H21) (cAMP-dependent protein kinase regulatory subunit II high affinity-binding protein)	AKAP5
P24588	P24588_S81	0.969571	NA	P24588	AKAP5_HUMAN	A-kinase anchor protein 5 (AKAP-5) (A-kinase anchor protein 79 kDa) (AKAP 79) (H21) (cAMP-dependent protein kinase regulatory subunit II high affinity-binding protein)	AKAP5
P24928	P24928_S1850	-0.600029	0.674748	P24928	RPB1_HUMAN	DNA-directed RNA polymerase II subunit RPB1 (RNA polymerase II subunit B1) (EC 2.7.7.6) (DNA-directed RNA polymerase II subunit A) (DNA-directed RNA polymerase III largest subunit) (RNA-directed RNA polymerase II subunit RPB1) (EC 2.7.7.48)	POLR2A
P24928	P24928_S1864	0.0680664	NA	P24928	RPB1_HUMAN	DNA-directed RNA polymerase II subunit RPB1 (RNA polymerase II subunit B1) (EC 2.7.7.6) (DNA-directed RNA polymerase II subunit A) (DNA-directed RNA polymerase III largest subunit) (RNA-directed RNA polymerase II subunit RPB1) (EC 2.7.7.48)	POLR2A
P24928	P24928_S1878	-1.32539	NA	P24928	RPB1_HUMAN	DNA-directed RNA polymerase II subunit RPB1 (RNA polymerase II subunit B1) (EC 2.7.7.6) (DNA-directed RNA polymerase II subunit A) (DNA-directed RNA polymerase III largest subunit) (RNA-directed RNA polymerase II subunit RPB1) (EC 2.7.7.48)	POLR2A
P24928	P24928_S1892	-3.11495	NA	P24928	RPB1_HUMAN	DNA-directed RNA polymerase II subunit RPB1 (RNA polymerase II subunit B1) (EC 2.7.7.6) (DNA-directed RNA polymerase II subunit A) (DNA-directed RNA polymerase III largest subunit) (RNA-directed RNA polymerase II subunit RPB1) (EC 2.7.7.48)	POLR2A
P24928	P24928_S1892,P24928_S1906	-1.61377	0.371486	P24928	RPB1_HUMAN	DNA-directed RNA polymerase II subunit RPB1 (RNA polymerase II subunit B1) (EC 2.7.7.6) (DNA-directed RNA polymerase II subunit A) (DNA-directed RNA polymerase III largest subunit) (RNA-directed RNA polymerase II subunit RPB1) (EC 2.7.7.48)	POLR2A
P24928	P24928_S1906	-1.51665	NA	P24928	RPB1_HUMAN	DNA-directed RNA polymerase II subunit RPB1 (RNA polymerase II subunit B1) (EC 2.7.7.6) (DNA-directed RNA polymerase II subunit A) (DNA-directed RNA polymerase III largest subunit) (RNA-directed RNA polymerase II subunit RPB1) (EC 2.7.7.48)	POLR2A
P24928	P24928_S1913	5.46728	NA	P24928	RPB1_HUMAN	DNA-directed RNA polymerase II subunit RPB1 (RNA polymerase II subunit B1) (EC 2.7.7.6) (DNA-directed RNA polymerase II subunit A) (DNA-directed RNA polymerase III largest subunit) (RNA-directed RNA polymerase II subunit RPB1) (EC 2.7.7.48)	POLR2A
P24928	P24928_S1913,P24928_S1920	NA	NA	P24928	RPB1_HUMAN	DNA-directed RNA polymerase II subunit RPB1 (RNA polymerase II subunit B1) (EC 2.7.7.6) (DNA-directed RNA polymerase II subunit A) (DNA-directed RNA polymerase III largest subunit) (RNA-directed RNA polymerase II subunit RPB1) (EC 2.7.7.48)	POLR2A
P25054	P25054_S1042	-0.352155	0.262406	P25054	APC_HUMAN	Adenomatous polyposis coli protein (Protein APC) (Deleted in polyposis 2.5)	APC
P25054	P25054_S1436	0.645564	0.247633	P25054	APC_HUMAN	Adenomatous polyposis coli protein (Protein APC) (Deleted in polyposis 2.5)	APC
P25054	P25054_S1664	NA	NA	P25054	APC_HUMAN	Adenomatous polyposis coli protein (Protein APC) (Deleted in polyposis 2.5)	APC
P25054	P25054_S2129	-1.90791	NA	P25054	APC_HUMAN	Adenomatous polyposis coli protein (Protein APC) (Deleted in polyposis 2.5)	APC
P25054	P25054_S2283	-1.45525	0.0158007	P25054	APC_HUMAN	Adenomatous polyposis coli protein (Protein APC) (Deleted in polyposis 2.5)	APC
P25054	P25054_S2337	-4.99775	NA	P25054	APC_HUMAN	Adenomatous polyposis coli protein (Protein APC) (Deleted in polyposis 2.5)	APC
P25054	P25054_S2449	-0.497591	NA	P25054	APC_HUMAN	Adenomatous polyposis coli protein (Protein APC) (Deleted in polyposis 2.5)	APC
P25054	P25054_S2533,P25054_S2535	0.59262	NA	P25054	APC_HUMAN	Adenomatous polyposis coli protein (Protein APC) (Deleted in polyposis 2.5)	APC
P25054	P25054_S2535	-3.14529	NA	P25054	APC_HUMAN	Adenomatous polyposis coli protein (Protein APC) (Deleted in polyposis 2.5)	APC
P25054	P25054_S2586	0.966042	0.329849	P25054	APC_HUMAN	Adenomatous polyposis coli protein (Protein APC) (Deleted in polyposis 2.5)	APC
P25054	P25054_S2771	0.89628	NA	P25054	APC_HUMAN	Adenomatous polyposis coli protein (Protein APC) (Deleted in polyposis 2.5)	APC
P25054	P25054_S2794	-1.26087	NA	P25054	APC_HUMAN	Adenomatous polyposis coli protein (Protein APC) (Deleted in polyposis 2.5)	APC
P25054	P25054_S2835	NA	NA	P25054	APC_HUMAN	Adenomatous polyposis coli protein (Protein APC) (Deleted in polyposis 2.5)	APC
P25054	P25054_S780	-0.808254	NA	P25054	APC_HUMAN	Adenomatous polyposis coli protein (Protein APC) (Deleted in polyposis 2.5)	APC
P25054	P25054_T1438	0.865613	0.473869	P25054	APC_HUMAN	Adenomatous polyposis coli protein (Protein APC) (Deleted in polyposis 2.5)	APC
P25098	P25098_S670	NA	NA	P25098	ARBK1_HUMAN	Beta-adrenergic receptor kinase 1 (Beta-ARK-1) (EC 2.7.11.15) (G-protein coupled receptor kinase 2)	ADRBK1
P25205	P25205_S160	-2.05592	0.453385	P25205	MCM3_HUMAN	DNA replication licensing factor MCM3 (EC 3.6.4.12) (DNA polymerase alpha holoenzyme-associated protein P1) (P1-MCM3) (RLF subunit beta) (p102)	MCM3
P25440	P25440_S298	NA	NA	P25440	BRD2_HUMAN	Bromodomain-containing protein 2 (O27.1.1) (Really interesting new gene 3 protein)	BRD2
P25440	P25440_S298,P25440_S301	-1.23527	NA	P25440	BRD2_HUMAN	Bromodomain-containing protein 2 (O27.1.1) (Really interesting new gene 3 protein)	BRD2
P25440	P25440_S301	-2.44018	0.354803	P25440	BRD2_HUMAN	Bromodomain-containing protein 2 (O27.1.1) (Really interesting new gene 3 protein)	BRD2
P25440	P25440_S633	NA	NA	P25440	BRD2_HUMAN	Bromodomain-containing protein 2 (O27.1.1) (Really interesting new gene 3 protein)	BRD2
P25490	P25490_S118	-0.971017	0.349606	P25490	TYY1_HUMAN	Transcriptional repressor protein YY1 (Delta transcription factor) (INO80 complex subunit S) (NF-E1) (Yin and yang 1) (YY-1)	YY1
P25490	P25490_S247	-2.37065	NA	P25490	TYY1_HUMAN	Transcriptional repressor protein YY1 (Delta transcription factor) (INO80 complex subunit S) (NF-E1) (Yin and yang 1) (YY-1)	YY1
P25788	P25788_S250	NA	NA	P25788	PSA3_HUMAN	Proteasome subunit alpha type-3 (EC 3.4.25.1) (Macropain subunit C8) (Multicatalytic endopeptidase complex subunit C8) (Proteasome component C8)	PSMA3
P26038	P26038_S407	-1.93186	NA	P26038	MOES_HUMAN	Moesin (Membrane-organizing extension spike protein)	MSN
P26358	P26358_S127	0.0780396	NA	P26358	DNMT1_HUMAN	DNA (cytosine-5)-methyltransferase 1 (Dnmt1) (EC 2.1.1.37) (CXXC-type zinc finger protein 9) (DNA methyltransferase HsaI) (DNA MTase HsaI) (M.HsaI) (MCMT)	DNMT1
P26358	P26358_S141,P26358_S143	0.773398	0.587652	P26358	DNMT1_HUMAN	DNA (cytosine-5)-methyltransferase 1 (Dnmt1) (EC 2.1.1.37) (CXXC-type zinc finger protein 9) (DNA methyltransferase HsaI) (DNA MTase HsaI) (M.HsaI) (MCMT)	DNMT1
P26358	P26358_S143	0.837874	0.357485	P26358	DNMT1_HUMAN	DNA (cytosine-5)-methyltransferase 1 (Dnmt1) (EC 2.1.1.37) (CXXC-type zinc finger protein 9) (DNA methyltransferase HsaI) (DNA MTase HsaI) (M.HsaI) (MCMT)	DNMT1
P26358	P26358_S714	-2.53646	NA	P26358	DNMT1_HUMAN	DNA (cytosine-5)-methyltransferase 1 (Dnmt1) (EC 2.1.1.37) (CXXC-type zinc finger protein 9) (DNA methyltransferase HsaI) (DNA MTase HsaI) (M.HsaI) (MCMT)	DNMT1
P26358	P26358_S954	-0.0645161	0.95144	P26358	DNMT1_HUMAN	DNA (cytosine-5)-methyltransferase 1 (Dnmt1) (EC 2.1.1.37) (CXXC-type zinc finger protein 9) (DNA methyltransferase HsaI) (DNA MTase HsaI) (M.HsaI) (MCMT)	DNMT1
P26368	P26368_S2	1.33626	0.630042	P26368	U2AF2_HUMAN	Splicing factor U2AF 65 kDa subunit (U2 auxiliary factor 65 kDa subunit) (hU2AF(65)) (hU2AF65) (U2 snRNP auxiliary factor large subunit)	U2AF2
P26368	P26368_S79	0.585461	0.498904	P26368	U2AF2_HUMAN	Splicing factor U2AF 65 kDa subunit (U2 auxiliary factor 65 kDa subunit) (hU2AF(65)) (hU2AF65) (U2 snRNP auxiliary factor large subunit)	U2AF2
P26599	P26599_S140	2.51543	NA	P26599	PTBP1_HUMAN	Polypyrimidine tract-binding protein 1 (PTB) (57 kDa RNA-binding protein PPTB-1) (Heterogeneous nuclear ribonucleoprotein I) (hnRNP I)	PTBP1
P26599	P26599_S141	-0.759942	NA	P26599	PTBP1_HUMAN	Polypyrimidine tract-binding protein 1 (PTB) (57 kDa RNA-binding protein PPTB-1) (Heterogeneous nuclear ribonucleoprotein I) (hnRNP I)	PTBP1
P26599	P26599_T138	2.75757	NA	P26599	PTBP1_HUMAN	Polypyrimidine tract-binding protein 1 (PTB) (57 kDa RNA-binding protein PPTB-1) (Heterogeneous nuclear ribonucleoprotein I) (hnRNP I)	PTBP1
P26639	P26639_S8	0.830687	0.0285632	P26639	SYTC_HUMAN	Threonine--tRNA ligase, cytoplasmic (EC 6.1.1.3) (Threonyl-tRNA synthetase) (ThrRS)	TARS
P26641	P26641_T230	1.57648	NA	P26641	EF1G_HUMAN	Elongation factor 1-gamma (EF-1-gamma) (eEF-1B gamma)	EEF1G
P27448	P27448_S400	-0.331678	0.8634	P27448	MARK3_HUMAN	MAP/microtubule affinity-regulating kinase 3 (EC 2.7.11.1) (C-TAK1) (cTAK1) (Cdc25C-associated protein kinase 1) (ELKL motif kinase 2) (EMK-2) (Protein kinase STK10) (Ser/Thr protein kinase PAR-1) (Par-1a) (Serine/threonine-protein kinase p78)	MARK3
P27448	P27448_S419	-0.580482	0.628085	P27448	MARK3_HUMAN	MAP/microtubule affinity-regulating kinase 3 (EC 2.7.11.1) (C-TAK1) (cTAK1) (Cdc25C-associated protein kinase 1) (ELKL motif kinase 2) (EMK-2) (Protein kinase STK10) (Ser/Thr protein kinase PAR-1) (Par-1a) (Serine/threonine-protein kinase p78)	MARK3
P27540	P27540_S77	2.21727	0.175655	P27540	ARNT_HUMAN	Aryl hydrocarbon receptor nuclear translocator (ARNT protein) (Class E basic helix-loop-helix protein 2) (bHLHe2) (Dioxin receptor, nuclear translocator) (Hypoxia-inducible factor 1-beta) (HIF-1-beta) (HIF1-beta)	ARNT
P27707	P27707_S11	-0.279724	0.545314	P27707	DCK_HUMAN	Deoxycytidine kinase (dCK) (EC 2.7.1.74)	DCK
P27707	P27707_T3	0.0247267	NA	P27707	DCK_HUMAN	Deoxycytidine kinase (dCK) (EC 2.7.1.74)	DCK
P27708	P27708_S1406	-0.170866	NA	P27708	PYR1_HUMAN	CAD protein [Includes: Glutamine-dependent carbamoyl-phosphate synthase (EC 6.3.5.5); Aspartate carbamoyltransferase (EC 2.1.3.2); Dihydroorotase (EC 3.5.2.3)]	CAD
P27708	P27708_S1859	-0.703169	0.37565	P27708	PYR1_HUMAN	CAD protein [Includes: Glutamine-dependent carbamoyl-phosphate synthase (EC 6.3.5.5); Aspartate carbamoyltransferase (EC 2.1.3.2); Dihydroorotase (EC 3.5.2.3)]	CAD
P27708	P27708_T1833	NA	NA	P27708	PYR1_HUMAN	CAD protein [Includes: Glutamine-dependent carbamoyl-phosphate synthase (EC 6.3.5.5); Aspartate carbamoyltransferase (EC 2.1.3.2); Dihydroorotase (EC 3.5.2.3)]	CAD
P27816	P27816_S1000	1.57155	0.186274	P27816	MAP4_HUMAN	Microtubule-associated protein 4 (MAP-4)	MAP4
P27816	P27816_S1073	-1.10077	0.340729	P27816	MAP4_HUMAN	Microtubule-associated protein 4 (MAP-4)	MAP4
P27816	P27816_S14	-2.59549	NA	P27816	MAP4_HUMAN	Microtubule-associated protein 4 (MAP-4)	MAP4
P27816	P27816_S280	-1.14413	0.599453	P27816	MAP4_HUMAN	Microtubule-associated protein 4 (MAP-4)	MAP4
P27816	P27816_S358	-1.88724	0.193822	P27816	MAP4_HUMAN	Microtubule-associated protein 4 (MAP-4)	MAP4
P27816	P27816_S440	-1.42637	0.255308	P27816	MAP4_HUMAN	Microtubule-associated protein 4 (MAP-4)	MAP4
P27816	P27816_S507	1.60758	NA	P27816	MAP4_HUMAN	Microtubule-associated protein 4 (MAP-4)	MAP4
P27816	P27816_S624	-1.91749	0.24042	P27816	MAP4_HUMAN	Microtubule-associated protein 4 (MAP-4)	MAP4
P27816	P27816_S636	0.604776	0.612735	P27816	MAP4_HUMAN	Microtubule-associated protein 4 (MAP-4)	MAP4
P27816	P27816_S696	0.0798751	0.944196	P27816	MAP4_HUMAN	Microtubule-associated protein 4 (MAP-4)	MAP4
P27816	P27816_S713	1.83177	0.151274	P27816	MAP4_HUMAN	Microtubule-associated protein 4 (MAP-4)	MAP4
P27816	P27816_S787	1.38508	0.190184	P27816	MAP4_HUMAN	Microtubule-associated protein 4 (MAP-4)	MAP4
P27816	P27816_S789	NA	NA	P27816	MAP4_HUMAN	Microtubule-associated protein 4 (MAP-4)	MAP4
P27816	P27816_S827	-5.02281	NA	P27816	MAP4_HUMAN	Microtubule-associated protein 4 (MAP-4)	MAP4
P27816	P27816_S941	1.0425	0.40986	P27816	MAP4_HUMAN	Microtubule-associated protein 4 (MAP-4)	MAP4
P27816	P27816_T354	-1.40567	NA	P27816	MAP4_HUMAN	Microtubule-associated protein 4 (MAP-4)	MAP4
P27816	P27816_T521	-3.49427	0.288006	P27816	MAP4_HUMAN	Microtubule-associated protein 4 (MAP-4)	MAP4
P27816	P27816_T571	-0.744794	0.568959	P27816	MAP4_HUMAN	Microtubule-associated protein 4 (MAP-4)	MAP4
P27816	P27816_T927	-1.70093	NA	P27816	MAP4_HUMAN	Microtubule-associated protein 4 (MAP-4)	MAP4
P27824	P27824_S554	0.981433	0.523237	P27824	CALX_HUMAN	Calnexin (IP90) (Major histocompatibility complex class I antigen-binding protein p88) (p90)	CANX
P27824	P27824_S554,P27824_S564	1.21684	0.207272	P27824	CALX_HUMAN	Calnexin (IP90) (Major histocompatibility complex class I antigen-binding protein p88) (p90)	CANX
P27824	P27824_S564	-0.0419031	0.920175	P27824	CALX_HUMAN	Calnexin (IP90) (Major histocompatibility complex class I antigen-binding protein p88) (p90)	CANX
P27824	P27824_S583	-0.739572	0.0757145	P27824	CALX_HUMAN	Calnexin (IP90) (Major histocompatibility complex class I antigen-binding protein p88) (p90)	CANX
P27824	P27824_T562	NA	NA	P27824	CALX_HUMAN	Calnexin (IP90) (Major histocompatibility complex class I antigen-binding protein p88) (p90)	CANX
P28290	P28290_S591	-0.201287	0.662506	P28290	SSFA2_HUMAN	Sperm-specific antigen 2 (Cleavage signal-1 protein) (CS-1) (Ki-ras-induced actin-interacting protein)	SSFA2
P28290	P28290_S668	-0.587177	0.441273	P28290	SSFA2_HUMAN	Sperm-specific antigen 2 (Cleavage signal-1 protein) (CS-1) (Ki-ras-induced actin-interacting protein)	SSFA2
P28290	P28290_S737	-0.966845	0.316895	P28290	SSFA2_HUMAN	Sperm-specific antigen 2 (Cleavage signal-1 protein) (CS-1) (Ki-ras-induced actin-interacting protein)	SSFA2
P28290	P28290_S739	0.211442	0.880557	P28290	SSFA2_HUMAN	Sperm-specific antigen 2 (Cleavage signal-1 protein) (CS-1) (Ki-ras-induced actin-interacting protein)	SSFA2
P28290	P28290_S759	2.25665	NA	P28290	SSFA2_HUMAN	Sperm-specific antigen 2 (Cleavage signal-1 protein) (CS-1) (Ki-ras-induced actin-interacting protein)	SSFA2
P28290	P28290_S92	-0.836526	0.598489	P28290	SSFA2_HUMAN	Sperm-specific antigen 2 (Cleavage signal-1 protein) (CS-1) (Ki-ras-induced actin-interacting protein)	SSFA2
P28715	P28715_S341	-0.784257	0.520293	P28715	ERCC5_HUMAN	DNA repair protein complementing XP-G cells (EC 3.1.-.-) (DNA excision repair protein ERCC-5) (Xeroderma pigmentosum group G-complementing protein)	ERCC5
P28715	P28715_S382	0.358867	NA	P28715	ERCC5_HUMAN	DNA repair protein complementing XP-G cells (EC 3.1.-.-) (DNA excision repair protein ERCC-5) (Xeroderma pigmentosum group G-complementing protein)	ERCC5
P28715	P28715_S384	0.0586129	0.928569	P28715	ERCC5_HUMAN	DNA repair protein complementing XP-G cells (EC 3.1.-.-) (DNA excision repair protein ERCC-5) (Xeroderma pigmentosum group G-complementing protein)	ERCC5
P28715	P28715_S526	-1.16066	0.359015	P28715	ERCC5_HUMAN	DNA repair protein complementing XP-G cells (EC 3.1.-.-) (DNA excision repair protein ERCC-5) (Xeroderma pigmentosum group G-complementing protein)	ERCC5
P28715	P28715_S562,P28715_S563	-1.32978	NA	P28715	ERCC5_HUMAN	DNA repair protein complementing XP-G cells (EC 3.1.-.-) (DNA excision repair protein ERCC-5) (Xeroderma pigmentosum group G-complementing protein)	ERCC5
P28715	P28715_S563	-0.96328	0.307421	P28715	ERCC5_HUMAN	DNA repair protein complementing XP-G cells (EC 3.1.-.-) (DNA excision repair protein ERCC-5) (Xeroderma pigmentosum group G-complementing protein)	ERCC5
P28749	P28749_S749	-1.64696	0.168782	P28749	RBL1_HUMAN	Retinoblastoma-like protein 1 (107 kDa retinoblastoma-associated protein) (p107) (pRb1)	RBL1
P28749	P28749_S749,P28749_S762	NA	NA	P28749	RBL1_HUMAN	Retinoblastoma-like protein 1 (107 kDa retinoblastoma-associated protein) (p107) (pRb1)	RBL1
P28799	P28799_S435	NA	NA	P28799	GRN_HUMAN	Granulins (Proepithelin) (PEPI) [Cleaved into: Acrogranin; Paragranulin; Granulin-1 (Granulin G); Granulin-2 (Granulin F); Granulin-3 (Granulin B); Granulin-4 (Granulin A); Granulin-5 (Granulin C); Granulin-6 (Granulin D); Granulin-7 (Granulin E)]	GRN
P29350	P29350_T555	1.44493	NA	P29350	PTN6_HUMAN	Tyrosine-protein phosphatase non-receptor type 6 (EC 3.1.3.48) (Hematopoietic cell protein-tyrosine phosphatase) (Protein-tyrosine phosphatase 1C) (PTP-1C) (Protein-tyrosine phosphatase SHP-1) (SH-PTP1)	PTPN6
P29374	P29374_S146	2.35212	0.175921	P29374	ARI4A_HUMAN	AT-rich interactive domain-containing protein 4A (ARID domain-containing protein 4A) (Retinoblastoma-binding protein 1) (RBBP-1)	ARID4A
P29374	P29374_S147	0.0602794	NA	P29374	ARI4A_HUMAN	AT-rich interactive domain-containing protein 4A (ARID domain-containing protein 4A) (Retinoblastoma-binding protein 1) (RBBP-1)	ARID4A
P29374	P29374_S864	0.942438	NA	P29374	ARI4A_HUMAN	AT-rich interactive domain-containing protein 4A (ARID domain-containing protein 4A) (Retinoblastoma-binding protein 1) (RBBP-1)	ARID4A
P29375	P29375_S1329	2.06606	NA	P29375	KDM5A_HUMAN	Lysine-specific demethylase 5A (EC 1.14.11.-) (Histone demethylase JARID1A) (Jumonji/ARID domain-containing protein 1A) (Retinoblastoma-binding protein 2) (RBBP-2)	KDM5A
P29536	P29536_S119	NA	NA	P29536	LMOD1_HUMAN	Leiomodin-1 (64 kDa autoantigen 1D) (64 kDa autoantigen 1D3) (64 kDa autoantigen D1) (Leiomodin, muscle form) (Smooth muscle leiomodin) (SM-Lmod) (Thyroid-associated ophthalmopathy autoantigen)	LMOD1
P29590	P29590_S403	0.227992	0.919077	P29590	PML_HUMAN	Protein PML (Promyelocytic leukemia protein) (RING finger protein 71) (Tripartite motif-containing protein 19)	PML
P29590	P29590_S480	-2.71265	NA	P29590	PML_HUMAN	Protein PML (Promyelocytic leukemia protein) (RING finger protein 71) (Tripartite motif-containing protein 19)	PML
P29590	P29590_S504	1.94251	NA	P29590	PML_HUMAN	Protein PML (Promyelocytic leukemia protein) (RING finger protein 71) (Tripartite motif-containing protein 19)	PML
P29590	P29590_S505	0.473471	0.214459	P29590	PML_HUMAN	Protein PML (Promyelocytic leukemia protein) (RING finger protein 71) (Tripartite motif-containing protein 19)	PML
P29590	P29590_S518	NA	NA	P29590	PML_HUMAN	Protein PML (Promyelocytic leukemia protein) (RING finger protein 71) (Tripartite motif-containing protein 19)	PML
P29590	P29590_S518,P29590_S527	-0.366618	0.685997	P29590	PML_HUMAN	Protein PML (Promyelocytic leukemia protein) (RING finger protein 71) (Tripartite motif-containing protein 19)	PML
P29590	P29590_S518,P29590_S527,P29590_S530	-2.07972	NA	P29590	PML_HUMAN	Protein PML (Promyelocytic leukemia protein) (RING finger protein 71) (Tripartite motif-containing protein 19)	PML
P29590	P29590_S527	-1.71119	0.0441397	P29590	PML_HUMAN	Protein PML (Promyelocytic leukemia protein) (RING finger protein 71) (Tripartite motif-containing protein 19)	PML
P29590	P29590_S530	NA	NA	P29590	PML_HUMAN	Protein PML (Promyelocytic leukemia protein) (RING finger protein 71) (Tripartite motif-containing protein 19)	PML
P29590	P29590_S8	-1.20831	NA	P29590	PML_HUMAN	Protein PML (Promyelocytic leukemia protein) (RING finger protein 71) (Tripartite motif-containing protein 19)	PML
P29692	P29692_S118	NA	NA	P29692	EF1D_HUMAN	Elongation factor 1-delta (EF-1-delta) (Antigen NY-CO-4)	EEF1D
P29692	P29692_S119,P29692_S133	0.549054	0.572356	P29692	EF1D_HUMAN	Elongation factor 1-delta (EF-1-delta) (Antigen NY-CO-4)	EEF1D
P29692	P29692_S133	-0.584637	0.633525	P29692	EF1D_HUMAN	Elongation factor 1-delta (EF-1-delta) (Antigen NY-CO-4)	EEF1D
P29692	P29692_S162	-2.10159	NA	P29692	EF1D_HUMAN	Elongation factor 1-delta (EF-1-delta) (Antigen NY-CO-4)	EEF1D
P29692	P29692_S60	0.0240846	NA	P29692	EF1D_HUMAN	Elongation factor 1-delta (EF-1-delta) (Antigen NY-CO-4)	EEF1D
P29966	P29966_S101	NA	NA	P29966	MARCS_HUMAN	Myristoylated alanine-rich C-kinase substrate (MARCKS) (Protein kinase C substrate, 80 kDa protein, light chain) (80K-L protein) (PKCSL)	MARCKS
P29966	P29966_S118	-1.6464	NA	P29966	MARCS_HUMAN	Myristoylated alanine-rich C-kinase substrate (MARCKS) (Protein kinase C substrate, 80 kDa protein, light chain) (80K-L protein) (PKCSL)	MARCKS
P29966	P29966_S131	-1.21547	0.433369	P29966	MARCS_HUMAN	Myristoylated alanine-rich C-kinase substrate (MARCKS) (Protein kinase C substrate, 80 kDa protein, light chain) (80K-L protein) (PKCSL)	MARCKS
P29966	P29966_S131,P29966_S132	-1.69354	NA	P29966	MARCS_HUMAN	Myristoylated alanine-rich C-kinase substrate (MARCKS) (Protein kinase C substrate, 80 kDa protein, light chain) (80K-L protein) (PKCSL)	MARCKS
P29966	P29966_S135	-0.955321	NA	P29966	MARCS_HUMAN	Myristoylated alanine-rich C-kinase substrate (MARCKS) (Protein kinase C substrate, 80 kDa protein, light chain) (80K-L protein) (PKCSL)	MARCKS
P29966	P29966_S145	-0.857223	0.357601	P29966	MARCS_HUMAN	Myristoylated alanine-rich C-kinase substrate (MARCKS) (Protein kinase C substrate, 80 kDa protein, light chain) (80K-L protein) (PKCSL)	MARCKS
P29966	P29966_S145,P29966_S147	NA	NA	P29966	MARCS_HUMAN	Myristoylated alanine-rich C-kinase substrate (MARCKS) (Protein kinase C substrate, 80 kDa protein, light chain) (80K-L protein) (PKCSL)	MARCKS
P29966	P29966_S147	NA	NA	P29966	MARCS_HUMAN	Myristoylated alanine-rich C-kinase substrate (MARCKS) (Protein kinase C substrate, 80 kDa protein, light chain) (80K-L protein) (PKCSL)	MARCKS
P29966	P29966_S170	-1.35965	0.298585	P29966	MARCS_HUMAN	Myristoylated alanine-rich C-kinase substrate (MARCKS) (Protein kinase C substrate, 80 kDa protein, light chain) (80K-L protein) (PKCSL)	MARCKS
P29966	P29966_S26	-0.332676	NA	P29966	MARCS_HUMAN	Myristoylated alanine-rich C-kinase substrate (MARCKS) (Protein kinase C substrate, 80 kDa protein, light chain) (80K-L protein) (PKCSL)	MARCKS
P29966	P29966_S27	-1.33071	NA	P29966	MARCS_HUMAN	Myristoylated alanine-rich C-kinase substrate (MARCKS) (Protein kinase C substrate, 80 kDa protein, light chain) (80K-L protein) (PKCSL)	MARCKS
P29966	P29966_S46	0.520954	0.485746	P29966	MARCS_HUMAN	Myristoylated alanine-rich C-kinase substrate (MARCKS) (Protein kinase C substrate, 80 kDa protein, light chain) (80K-L protein) (PKCSL)	MARCKS
P29966	P29966_S81	0.574612	0.187848	P29966	MARCS_HUMAN	Myristoylated alanine-rich C-kinase substrate (MARCKS) (Protein kinase C substrate, 80 kDa protein, light chain) (80K-L protein) (PKCSL)	MARCKS
P29966	P29966_T120,P29966_S135	NA	NA	P29966	MARCS_HUMAN	Myristoylated alanine-rich C-kinase substrate (MARCKS) (Protein kinase C substrate, 80 kDa protein, light chain) (80K-L protein) (PKCSL)	MARCKS
P29966	P29966_T133	0.517821	NA	P29966	MARCS_HUMAN	Myristoylated alanine-rich C-kinase substrate (MARCKS) (Protein kinase C substrate, 80 kDa protein, light chain) (80K-L protein) (PKCSL)	MARCKS
P29966	P29966_T150	NA	NA	P29966	MARCS_HUMAN	Myristoylated alanine-rich C-kinase substrate (MARCKS) (Protein kinase C substrate, 80 kDa protein, light chain) (80K-L protein) (PKCSL)	MARCKS
P30041	P30041_T44	NA	NA	P30041	PRDX6_HUMAN	Peroxiredoxin-6 (EC 1.11.1.15) (1-Cys peroxiredoxin) (1-Cys PRX) (24 kDa protein) (Acidic calcium-independent phospholipase A2) (aiPLA2) (EC 3.1.1.-) (Antioxidant protein 2) (Liver 2D page spot 40) (Non-selenium glutathione peroxidase) (NSGPx) (EC 1.11.1.9) (Red blood cells page spot 12)	PRDX6
P30086	P30086_S153	-0.658666	0.338349	P30086	PEBP1_HUMAN	Phosphatidylethanolamine-binding protein 1 (PEBP-1) (HCNPpp) (Neuropolypeptide h3) (Prostatic-binding protein) (Raf kinase inhibitor protein) (RKIP) [Cleaved into: Hippocampal cholinergic neurostimulating peptide (HCNP)]	PEBP1
P30260	P30260_S364	-1.66462	NA	P30260	CDC27_HUMAN	Cell division cycle protein 27 homolog (Anaphase-promoting complex subunit 3) (APC3) (CDC27 homolog) (CDC27Hs) (H-NUC)	CDC27
P30291	P30291_S165	0.0330303	NA	P30291	WEE1_HUMAN	Wee1-like protein kinase (WEE1hu) (EC 2.7.10.2) (Wee1A kinase)	WEE1
P30291	P30291_S165,P30291_T173	NA	NA	P30291	WEE1_HUMAN	Wee1-like protein kinase (WEE1hu) (EC 2.7.10.2) (Wee1A kinase)	WEE1
P30305	P30305_S353	-0.654773	0.201748	P30305	MPIP2_HUMAN	M-phase inducer phosphatase 2 (EC 3.1.3.48) (Dual specificity phosphatase Cdc25B)	CDC25B
P30307	P30307_S216	-0.853652	NA	P30307	MPIP3_HUMAN	M-phase inducer phosphatase 3 (EC 3.1.3.48) (Dual specificity phosphatase Cdc25C)	CDC25C
P30414	P30414_S1146	-1.29712	NA	P30414	NKTR_HUMAN	NK-tumor recognition protein (NK-TR protein) (Natural-killer cells cyclophilin-related protein) [Includes: Putative peptidyl-prolyl cis-trans isomerase (PPIase) (EC 5.2.1.8) (Rotamase)]	NKTR
P30414	P30414_S379	0.630141	NA	P30414	NKTR_HUMAN	NK-tumor recognition protein (NK-TR protein) (Natural-killer cells cyclophilin-related protein) [Includes: Putative peptidyl-prolyl cis-trans isomerase (PPIase) (EC 5.2.1.8) (Rotamase)]	NKTR
P30414	P30414_S463	0.640046	NA	P30414	NKTR_HUMAN	NK-tumor recognition protein (NK-TR protein) (Natural-killer cells cyclophilin-related protein) [Includes: Putative peptidyl-prolyl cis-trans isomerase (PPIase) (EC 5.2.1.8) (Rotamase)]	NKTR
P30419	P30419_S47	0.386829	0.711972	P30419	NMT1_HUMAN	Glycylpeptide N-tetradecanoyltransferase 1 (EC 2.3.1.97) (Myristoyl-CoA:protein N-myristoyltransferase 1) (NMT 1) (Type I N-myristoyltransferase) (Peptide N-myristoyltransferase 1)	NMT1
P30455;P30443;P16188;P13746;P04439	P30455_S343,P30443_S343,P16188_S343,P13746_S343,P04439_S343	0.228152	NA	P04439;P13746;P16188;P30443;P30455	1A03_HUMAN;1A11_HUMAN;1A30_HUMAN;1A01_HUMAN;1A36_HUMAN	HLA class I histocompatibility antigen, A-3 alpha chain (MHC class I antigen A*3);"HLA class I histocompatibility antigen, A-11 alpha chain (MHC class I antigen A*11)";"HLA class I histocompatibility antigen, A-30 alpha chain (MHC class I antigen A*30)";"HLA class I histocompatibility antigen, A-1 alpha chain (MHC class I antigen A*1)";"HLA class I histocompatibility antigen, A-36 alpha chain (Aw…	HLA-A;HLA-A;HLA-A;HLA-A;HLA-A
P30455;P30443;P16188;P13746;P04439	P30455_S352,P30443_S352,P16188_S352,P13746_S352,P04439_S352	-0.282224	NA	P04439;P13746;P16188;P30443;P30455	1A03_HUMAN;1A11_HUMAN;1A30_HUMAN;1A01_HUMAN;1A36_HUMAN	HLA class I histocompatibility antigen, A-3 alpha chain (MHC class I antigen A*3);"HLA class I histocompatibility antigen, A-11 alpha chain (MHC class I antigen A*11)";"HLA class I histocompatibility antigen, A-30 alpha chain (MHC class I antigen A*30)";"HLA class I histocompatibility antigen, A-1 alpha chain (MHC class I antigen A*1)";"HLA class I histocompatibility antigen, A-36 alpha chain (Aw…	HLA-A;HLA-A;HLA-A;HLA-A;HLA-A
P30455;P30443;P16188;P13746;P04439	P30455_S352,P30455_S356,P30443_S352,P30443_S356,P16188_S352,P16188_S356,P13746_S352,P13746_S356,P04439_S352,P04439_S356	0.351877	0.418435	P04439;P13746;P16188;P30443;P30455	1A03_HUMAN;1A11_HUMAN;1A30_HUMAN;1A01_HUMAN;1A36_HUMAN	HLA class I histocompatibility antigen, A-3 alpha chain (MHC class I antigen A*3);"HLA class I histocompatibility antigen, A-11 alpha chain (MHC class I antigen A*11)";"HLA class I histocompatibility antigen, A-30 alpha chain (MHC class I antigen A*30)";"HLA class I histocompatibility antigen, A-1 alpha chain (MHC class I antigen A*1)";"HLA class I histocompatibility antigen, A-36 alpha chain (Aw…	HLA-A;HLA-A;HLA-A;HLA-A;HLA-A
P30455;P30443;P16188;P13746;P04439	P30455_S356,P30443_S356,P16188_S356,P13746_S356,P04439_S356	-0.0577573	NA	P04439;P13746;P16188;P30443;P30455	1A03_HUMAN;1A11_HUMAN;1A30_HUMAN;1A01_HUMAN;1A36_HUMAN	HLA class I histocompatibility antigen, A-3 alpha chain (MHC class I antigen A*3);"HLA class I histocompatibility antigen, A-11 alpha chain (MHC class I antigen A*11)";"HLA class I histocompatibility antigen, A-30 alpha chain (MHC class I antigen A*30)";"HLA class I histocompatibility antigen, A-1 alpha chain (MHC class I antigen A*1)";"HLA class I histocompatibility antigen, A-36 alpha chain (Aw…	HLA-A;HLA-A;HLA-A;HLA-A;HLA-A
P30519	P30519_S2	-0.873039	0.299663	P30519	HMOX2_HUMAN	Heme oxygenase 2 (HO-2) (EC 1.14.99.3)	HMOX2
P30566	P30566_S9	-1.52221	0.0921289	P30566	PUR8_HUMAN	Adenylosuccinate lyase (ASL) (EC 4.3.2.2) (Adenylosuccinase) (ASase)	ADSL
P30622	P30622_S1009	NA	NA	P30622	CLIP1_HUMAN	CAP-Gly domain-containing linker protein 1 (Cytoplasmic linker protein 1) (Cytoplasmic linker protein 170 alpha-2) (CLIP-170) (Reed-Sternberg intermediate filament-associated protein) (Restin)	CLIP1
P30622	P30622_S143	1.16163	NA	P30622	CLIP1_HUMAN	CAP-Gly domain-containing linker protein 1 (Cytoplasmic linker protein 1) (Cytoplasmic linker protein 170 alpha-2) (CLIP-170) (Reed-Sternberg intermediate filament-associated protein) (Restin)	CLIP1
P30622	P30622_S195,P30622_S204	-2.82954	NA	P30622	CLIP1_HUMAN	CAP-Gly domain-containing linker protein 1 (Cytoplasmic linker protein 1) (Cytoplasmic linker protein 170 alpha-2) (CLIP-170) (Reed-Sternberg intermediate filament-associated protein) (Restin)	CLIP1
P30622	P30622_S200,P30622_S204	-2.05436	NA	P30622	CLIP1_HUMAN	CAP-Gly domain-containing linker protein 1 (Cytoplasmic linker protein 1) (Cytoplasmic linker protein 170 alpha-2) (CLIP-170) (Reed-Sternberg intermediate filament-associated protein) (Restin)	CLIP1
P30622	P30622_S204	-0.221885	0.680395	P30622	CLIP1_HUMAN	CAP-Gly domain-containing linker protein 1 (Cytoplasmic linker protein 1) (Cytoplasmic linker protein 170 alpha-2) (CLIP-170) (Reed-Sternberg intermediate filament-associated protein) (Restin)	CLIP1
P30622	P30622_S310	-3.43686	NA	P30622	CLIP1_HUMAN	CAP-Gly domain-containing linker protein 1 (Cytoplasmic linker protein 1) (Cytoplasmic linker protein 170 alpha-2) (CLIP-170) (Reed-Sternberg intermediate filament-associated protein) (Restin)	CLIP1
P30622	P30622_S312	1.26777	NA	P30622	CLIP1_HUMAN	CAP-Gly domain-containing linker protein 1 (Cytoplasmic linker protein 1) (Cytoplasmic linker protein 170 alpha-2) (CLIP-170) (Reed-Sternberg intermediate filament-associated protein) (Restin)	CLIP1
P31274	P31274_S159	-0.484007	NA	P31274	HXC9_HUMAN	Homeobox protein Hox-C9 (Homeobox protein Hox-3B)	HOXC9
P31321	P31321_S3	-2.45353	NA	P31321	KAP1_HUMAN	cAMP-dependent protein kinase type I-beta regulatory subunit	PRKAR1B
P31323	P31323_S114	0.31649	NA	P31323	KAP3_HUMAN	cAMP-dependent protein kinase type II-beta regulatory subunit	PRKAR2B
P31350	P31350_S20	-1.88158	0.440849	P31350	RIR2_HUMAN	Ribonucleoside-diphosphate reductase subunit M2 (EC 1.17.4.1) (Ribonucleotide reductase small chain) (Ribonucleotide reductase small subunit)	RRM2
P31350	P31350_T33	-1.12887	0.232763	P31350	RIR2_HUMAN	Ribonucleoside-diphosphate reductase subunit M2 (EC 1.17.4.1) (Ribonucleotide reductase small chain) (Ribonucleotide reductase small subunit)	RRM2
P31629	P31629_S169	2.73926	NA	P31629	ZEP2_HUMAN	Transcription factor HIVEP2 (Human immunodeficiency virus type I enhancer-binding protein 2) (HIV-EP2) (MHC-binding protein 2) (MBP-2)	HIVEP2
P31629	P31629_S2118	0.74023	NA	P31629	ZEP2_HUMAN	Transcription factor HIVEP2 (Human immunodeficiency virus type I enhancer-binding protein 2) (HIV-EP2) (MHC-binding protein 2) (MBP-2)	HIVEP2
P31629	P31629_S2429	1.74226	NA	P31629	ZEP2_HUMAN	Transcription factor HIVEP2 (Human immunodeficiency virus type I enhancer-binding protein 2) (HIV-EP2) (MHC-binding protein 2) (MBP-2)	HIVEP2
P31629	P31629_S819	0.203028	0.57537	P31629	ZEP2_HUMAN	Transcription factor HIVEP2 (Human immunodeficiency virus type I enhancer-binding protein 2) (HIV-EP2) (MHC-binding protein 2) (MBP-2)	HIVEP2
P31749	P31749_S122,P31749_S124	-4.10354	NA	P31749	AKT1_HUMAN	RAC-alpha serine/threonine-protein kinase (EC 2.7.11.1) (Protein kinase B) (PKB) (Protein kinase B alpha) (PKB alpha) (Proto-oncogene c-Akt) (RAC-PK-alpha)	AKT1
P31948	P31948_S16	0.387584	NA	P31948	STIP1_HUMAN	Stress-induced-phosphoprotein 1 (STI1) (Hsc70/Hsp90-organizing protein) (Hop) (Renal carcinoma antigen NY-REN-11) (Transformation-sensitive protein IEF SSP 3521)	STIP1
P31948	P31948_S481	0.970567	0.453206	P31948	STIP1_HUMAN	Stress-induced-phosphoprotein 1 (STI1) (Hsc70/Hsp90-organizing protein) (Hop) (Renal carcinoma antigen NY-REN-11) (Transformation-sensitive protein IEF SSP 3521)	STIP1
P32519	P32519_S163,P32519_S168	-0.0403336	NA	P32519	ELF1_HUMAN	ETS-related transcription factor Elf-1 (E74-like factor 1)	ELF1
P32519	P32519_S167	1.08868	NA	P32519	ELF1_HUMAN	ETS-related transcription factor Elf-1 (E74-like factor 1)	ELF1
P32519	P32519_S187	-1.76916	NA	P32519	ELF1_HUMAN	ETS-related transcription factor Elf-1 (E74-like factor 1)	ELF1
P33316	P33316_S99	NA	NA	P33316	DUT_HUMAN	Deoxyuridine 5'-triphosphate nucleotidohydrolase, mitochondrial (dUTPase) (EC 3.6.1.23) (dUTP pyrophosphatase)	DUT
P33527	P33527_S915,P33527_S919	-0.670383	0.517484	P33527	MRP1_HUMAN	Multidrug resistance-associated protein 1 (ATP-binding cassette sub-family C member 1) (Leukotriene C(4) transporter) (LTC4 transporter)	ABCC1
P33527	P33527_S917	-0.749718	0.147307	P33527	MRP1_HUMAN	Multidrug resistance-associated protein 1 (ATP-binding cassette sub-family C member 1) (Leukotriene C(4) transporter) (LTC4 transporter)	ABCC1
P33981	P33981_S281	-3.84068	NA	P33981	TTK_HUMAN	Dual specificity protein kinase TTK (EC 2.7.12.1) (Phosphotyrosine picked threonine-protein kinase) (PYT)	TTK
P33981	P33981_S436	-3.35636	NA	P33981	TTK_HUMAN	Dual specificity protein kinase TTK (EC 2.7.12.1) (Phosphotyrosine picked threonine-protein kinase) (PYT)	TTK
P33981	P33981_S821	-1.57096	NA	P33981	TTK_HUMAN	Dual specificity protein kinase TTK (EC 2.7.12.1) (Phosphotyrosine picked threonine-protein kinase) (PYT)	TTK
P33991	P33991_S120	2.40622	NA	P33991	MCM4_HUMAN	DNA replication licensing factor MCM4 (EC 3.6.4.12) (CDC21 homolog) (P1-CDC21)	MCM4
P33991	P33991_S13	NA	NA	P33991	MCM4_HUMAN	DNA replication licensing factor MCM4 (EC 3.6.4.12) (CDC21 homolog) (P1-CDC21)	MCM4
P33991	P33991_S2	1.75515	0.179461	P33991	MCM4_HUMAN	DNA replication licensing factor MCM4 (EC 3.6.4.12) (CDC21 homolog) (P1-CDC21)	MCM4
P33991	P33991_S3	1.00752	NA	P33991	MCM4_HUMAN	DNA replication licensing factor MCM4 (EC 3.6.4.12) (CDC21 homolog) (P1-CDC21)	MCM4
P33991	P33991_S31	NA	NA	P33991	MCM4_HUMAN	DNA replication licensing factor MCM4 (EC 3.6.4.12) (CDC21 homolog) (P1-CDC21)	MCM4
P33991	P33991_T110	1.71423	NA	P33991	MCM4_HUMAN	DNA replication licensing factor MCM4 (EC 3.6.4.12) (CDC21 homolog) (P1-CDC21)	MCM4
P34932	P34932_S76	3.88504	NA	P34932	HSP74_HUMAN	Heat shock 70 kDa protein 4 (HSP70RY) (Heat shock 70-related protein APG-2)	HSPA4
P35221	P35221_S641	-0.15802	0.960063	P35221	CTNA1_HUMAN	Catenin alpha-1 (Alpha E-catenin) (Cadherin-associated protein) (Renal carcinoma antigen NY-REN-13)	CTNNA1
P35221;P26232	P35221_T654,P26232_T653	0.351473	0.748908	P26232;P35221	CTNA2_HUMAN;CTNA1_HUMAN	Catenin alpha-2 (Alpha N-catenin) (Alpha-catenin-related protein);Catenin alpha-1 (Alpha E-catenin) (Cadherin-associated protein) (Renal carcinoma antigen NY-REN-13)	CTNNA2;CTNNA1
P35221;P26232	P35221_T654,P35221_S655,P26232_T653,P26232_S654	-2.09386	0.41052	P26232;P35221	CTNA2_HUMAN;CTNA1_HUMAN	Catenin alpha-2 (Alpha N-catenin) (Alpha-catenin-related protein);Catenin alpha-1 (Alpha E-catenin) (Cadherin-associated protein) (Renal carcinoma antigen NY-REN-13)	CTNNA2;CTNNA1
P35222	P35222_S191	-1.45009	0.571783	P35222	CTNB1_HUMAN	Catenin beta-1 (Beta-catenin)	CTNNB1
P35222	P35222_S552	-0.603016	NA	P35222	CTNB1_HUMAN	Catenin beta-1 (Beta-catenin)	CTNNB1
P35222	P35222_S675	-4.93067	NA	P35222	CTNB1_HUMAN	Catenin beta-1 (Beta-catenin)	CTNNB1
P35222	P35222_T551	-0.99091	0.63792	P35222	CTNB1_HUMAN	Catenin beta-1 (Beta-catenin)	CTNNB1
P35226	P35226_S316	4.70117	NA	P35226	BMI1_HUMAN	Polycomb complex protein BMI-1 (Polycomb group RING finger protein 4) (RING finger protein 51)	BMI1
P35226	P35226_S320	2.69101	NA	P35226	BMI1_HUMAN	Polycomb complex protein BMI-1 (Polycomb group RING finger protein 4) (RING finger protein 51)	BMI1
P35251	P35251_S156	-1.77328	0.517509	P35251	RFC1_HUMAN	Replication factor C subunit 1 (Activator 1 140 kDa subunit) (A1 140 kDa subunit) (Activator 1 large subunit) (Activator 1 subunit 1) (DNA-binding protein PO-GA) (Replication factor C 140 kDa subunit) (RF-C 140 kDa subunit) (RFC140) (Replication factor C large subunit)	RFC1
P35251	P35251_S156,P35251_T161	1.65424	NA	P35251	RFC1_HUMAN	Replication factor C subunit 1 (Activator 1 140 kDa subunit) (A1 140 kDa subunit) (Activator 1 large subunit) (Activator 1 subunit 1) (DNA-binding protein PO-GA) (Replication factor C 140 kDa subunit) (RF-C 140 kDa subunit) (RFC140) (Replication factor C large subunit)	RFC1
P35251	P35251_S312	NA	NA	P35251	RFC1_HUMAN	Replication factor C subunit 1 (Activator 1 140 kDa subunit) (A1 140 kDa subunit) (Activator 1 large subunit) (Activator 1 subunit 1) (DNA-binding protein PO-GA) (Replication factor C 140 kDa subunit) (RF-C 140 kDa subunit) (RFC140) (Replication factor C large subunit)	RFC1
P35251	P35251_S366	1.90318	NA	P35251	RFC1_HUMAN	Replication factor C subunit 1 (Activator 1 140 kDa subunit) (A1 140 kDa subunit) (Activator 1 large subunit) (Activator 1 subunit 1) (DNA-binding protein PO-GA) (Replication factor C 140 kDa subunit) (RF-C 140 kDa subunit) (RFC140) (Replication factor C large subunit)	RFC1
P35251	P35251_S69	-1.61477	NA	P35251	RFC1_HUMAN	Replication factor C subunit 1 (Activator 1 140 kDa subunit) (A1 140 kDa subunit) (Activator 1 large subunit) (Activator 1 subunit 1) (DNA-binding protein PO-GA) (Replication factor C 140 kDa subunit) (RF-C 140 kDa subunit) (RFC140) (Replication factor C large subunit)	RFC1
P35251	P35251_S69,P35251_S71	NA	NA	P35251	RFC1_HUMAN	Replication factor C subunit 1 (Activator 1 140 kDa subunit) (A1 140 kDa subunit) (Activator 1 large subunit) (Activator 1 subunit 1) (DNA-binding protein PO-GA) (Replication factor C 140 kDa subunit) (RF-C 140 kDa subunit) (RFC140) (Replication factor C large subunit)	RFC1
P35251	P35251_S71	1.65851	NA	P35251	RFC1_HUMAN	Replication factor C subunit 1 (Activator 1 140 kDa subunit) (A1 140 kDa subunit) (Activator 1 large subunit) (Activator 1 subunit 1) (DNA-binding protein PO-GA) (Replication factor C 140 kDa subunit) (RF-C 140 kDa subunit) (RFC140) (Replication factor C large subunit)	RFC1
P35251	P35251_S73	-0.990262	0.150985	P35251	RFC1_HUMAN	Replication factor C subunit 1 (Activator 1 140 kDa subunit) (A1 140 kDa subunit) (Activator 1 large subunit) (Activator 1 subunit 1) (DNA-binding protein PO-GA) (Replication factor C 140 kDa subunit) (RF-C 140 kDa subunit) (RFC140) (Replication factor C large subunit)	RFC1
P35251	P35251_T506	1.42717	0.244829	P35251	RFC1_HUMAN	Replication factor C subunit 1 (Activator 1 140 kDa subunit) (A1 140 kDa subunit) (Activator 1 large subunit) (Activator 1 subunit 1) (DNA-binding protein PO-GA) (Replication factor C 140 kDa subunit) (RF-C 140 kDa subunit) (RFC140) (Replication factor C large subunit)	RFC1
P35269	P35269_S224	-0.66501	NA	P35269	T2FA_HUMAN	General transcription factor IIF subunit 1 (General transcription factor IIF 74 kDa subunit) (Transcription initiation factor IIF subunit alpha) (TFIIF-alpha) (Transcription initiation factor RAP74)	GTF2F1
P35269	P35269_S385	-0.566962	0.195277	P35269	T2FA_HUMAN	General transcription factor IIF subunit 1 (General transcription factor IIF 74 kDa subunit) (Transcription initiation factor IIF subunit alpha) (TFIIF-alpha) (Transcription initiation factor RAP74)	GTF2F1
P35269	P35269_S385,P35269_T389	-0.426611	0.595601	P35269	T2FA_HUMAN	General transcription factor IIF subunit 1 (General transcription factor IIF 74 kDa subunit) (Transcription initiation factor IIF subunit alpha) (TFIIF-alpha) (Transcription initiation factor RAP74)	GTF2F1
P35269	P35269_S442	0.832313	NA	P35269	T2FA_HUMAN	General transcription factor IIF subunit 1 (General transcription factor IIF 74 kDa subunit) (Transcription initiation factor IIF subunit alpha) (TFIIF-alpha) (Transcription initiation factor RAP74)	GTF2F1
P35269	P35269_T389	-1.29829	NA	P35269	T2FA_HUMAN	General transcription factor IIF subunit 1 (General transcription factor IIF 74 kDa subunit) (Transcription initiation factor IIF subunit alpha) (TFIIF-alpha) (Transcription initiation factor RAP74)	GTF2F1
P35269	P35269_T445	-0.767077	0.246034	P35269	T2FA_HUMAN	General transcription factor IIF subunit 1 (General transcription factor IIF 74 kDa subunit) (Transcription initiation factor IIF subunit alpha) (TFIIF-alpha) (Transcription initiation factor RAP74)	GTF2F1
P35318	P35318_S153	-0.167735	0.635652	P35318	ADML_HUMAN	ADM [Cleaved into: Adrenomedullin (AM); Proadrenomedullin N-20 terminal peptide (ProAM N-terminal 20 peptide) (PAMP) (ProAM-N20)]	ADM
P35367	P35367_S378	NA	NA	P35367	HRH1_HUMAN	Histamine H1 receptor (H1R) (HH1R)	HRH1
P35568	P35568_S1078	0.338792	0.656062	P35568	IRS1_HUMAN	Insulin receptor substrate 1 (IRS-1)	IRS1
P35568	P35568_S1100	0.330129	0.785614	P35568	IRS1_HUMAN	Insulin receptor substrate 1 (IRS-1)	IRS1
P35568	P35568_S1100,P35568_S1101	0.0141644	NA	P35568	IRS1_HUMAN	Insulin receptor substrate 1 (IRS-1)	IRS1
P35568	P35568_S1101	0.617941	NA	P35568	IRS1_HUMAN	Insulin receptor substrate 1 (IRS-1)	IRS1
P35568	P35568_S1134	-2.52793	NA	P35568	IRS1_HUMAN	Insulin receptor substrate 1 (IRS-1)	IRS1
P35568	P35568_S1142	-2.96372	NA	P35568	IRS1_HUMAN	Insulin receptor substrate 1 (IRS-1)	IRS1
P35568	P35568_S270	-0.766666	NA	P35568	IRS1_HUMAN	Insulin receptor substrate 1 (IRS-1)	IRS1
P35568	P35568_S3	NA	NA	P35568	IRS1_HUMAN	Insulin receptor substrate 1 (IRS-1)	IRS1
P35568	P35568_S892	NA	NA	P35568	IRS1_HUMAN	Insulin receptor substrate 1 (IRS-1)	IRS1
P35568	P35568_T446	-1.61678	NA	P35568	IRS1_HUMAN	Insulin receptor substrate 1 (IRS-1)	IRS1
P35579	P35579_S1943	0.497226	0.408958	P35579	MYH9_HUMAN	Myosin-9 (Cellular myosin heavy chain, type A) (Myosin heavy chain 9) (Myosin heavy chain, non-muscle IIa) (Non-muscle myosin heavy chain A) (NMMHC-A) (Non-muscle myosin heavy chain IIa) (NMMHC II-a) (NMMHC-IIA)	MYH9
P35580	P35580_S1952,P35580_S1956	NA	NA	P35580	MYH10_HUMAN	Myosin-10 (Cellular myosin heavy chain, type B) (Myosin heavy chain 10) (Myosin heavy chain, non-muscle IIb) (Non-muscle myosin heavy chain B) (NMMHC-B) (Non-muscle myosin heavy chain IIb) (NMMHC II-b) (NMMHC-IIB)	MYH10
P35580	P35580_S1956	-0.49578	0.728733	P35580	MYH10_HUMAN	Myosin-10 (Cellular myosin heavy chain, type B) (Myosin heavy chain 10) (Myosin heavy chain, non-muscle IIb) (Non-muscle myosin heavy chain B) (NMMHC-B) (Non-muscle myosin heavy chain IIb) (NMMHC II-b) (NMMHC-IIB)	MYH10
P35580	P35580_S1975	0.524656	NA	P35580	MYH10_HUMAN	Myosin-10 (Cellular myosin heavy chain, type B) (Myosin heavy chain 10) (Myosin heavy chain, non-muscle IIb) (Non-muscle myosin heavy chain B) (NMMHC-B) (Non-muscle myosin heavy chain IIb) (NMMHC II-b) (NMMHC-IIB)	MYH10
P35606	P35606_S847	-0.133034	NA	P35606	COPB2_HUMAN	Coatomer subunit beta' (Beta'-coat protein) (Beta'-COP) (p102)	COPB2
P35606	P35606_S859	-2.57182	0.275041	P35606	COPB2_HUMAN	Coatomer subunit beta' (Beta'-coat protein) (Beta'-COP) (p102)	COPB2
P35606	P35606_T861	-1.93804	0.141186	P35606	COPB2_HUMAN	Coatomer subunit beta' (Beta'-coat protein) (Beta'-COP) (p102)	COPB2
P35611	P35611_S12	-0.392479	0.645204	P35611	ADDA_HUMAN	Alpha-adducin (Erythrocyte adducin subunit alpha)	ADD1
P35611	P35611_S358	-1.17723	NA	P35611	ADDA_HUMAN	Alpha-adducin (Erythrocyte adducin subunit alpha)	ADD1
P35611	P35611_S431	-3.01956	NA	P35611	ADDA_HUMAN	Alpha-adducin (Erythrocyte adducin subunit alpha)	ADD1
P35611	P35611_S436	-0.884508	NA	P35611	ADDA_HUMAN	Alpha-adducin (Erythrocyte adducin subunit alpha)	ADD1
P35611	P35611_S464	-1.27178	NA	P35611	ADDA_HUMAN	Alpha-adducin (Erythrocyte adducin subunit alpha)	ADD1
P35611	P35611_S465	-1.27309	0.52728	P35611	ADDA_HUMAN	Alpha-adducin (Erythrocyte adducin subunit alpha)	ADD1
P35611	P35611_S586	1.12522	0.408428	P35611	ADDA_HUMAN	Alpha-adducin (Erythrocyte adducin subunit alpha)	ADD1
P35611	P35611_S600	-0.226993	0.457243	P35611	ADDA_HUMAN	Alpha-adducin (Erythrocyte adducin subunit alpha)	ADD1
P35611	P35611_T11	-0.470715	NA	P35611	ADDA_HUMAN	Alpha-adducin (Erythrocyte adducin subunit alpha)	ADD1
P35611;P35612;Q9UEY8	P35611_S726,P35612_S713,Q9UEY8_S693	-0.87272	0.237998	P35611;P35612;Q9UEY8	ADDA_HUMAN;ADDB_HUMAN;ADDG_HUMAN	Alpha-adducin (Erythrocyte adducin subunit alpha);Beta-adducin (Erythrocyte adducin subunit beta);Gamma-adducin (Adducin-like protein 70)	ADD1;ADD2;ADD3
P35612	P35612_S11	-1.41628	0.405713	P35612	ADDB_HUMAN	Beta-adducin (Erythrocyte adducin subunit beta)	ADD2
P35612	P35612_S530	0.226338	NA	P35612	ADDB_HUMAN	Beta-adducin (Erythrocyte adducin subunit beta)	ADD2
P35612	P35612_S592	0.29754	0.742967	P35612	ADDB_HUMAN	Beta-adducin (Erythrocyte adducin subunit beta)	ADD2
P35612	P35612_S596,P35612_S600	-0.238498	0.692834	P35612	ADDB_HUMAN	Beta-adducin (Erythrocyte adducin subunit beta)	ADD2
P35612	P35612_S600	0.029531	0.976844	P35612	ADDB_HUMAN	Beta-adducin (Erythrocyte adducin subunit beta)	ADD2
P35612	P35612_S613	0.300281	NA	P35612	ADDB_HUMAN	Beta-adducin (Erythrocyte adducin subunit beta)	ADD2
P35612	P35612_S621	-1.45535	0.222055	P35612	ADDB_HUMAN	Beta-adducin (Erythrocyte adducin subunit beta)	ADD2
P35612	P35612_S699	0.366399	NA	P35612	ADDB_HUMAN	Beta-adducin (Erythrocyte adducin subunit beta)	ADD2
P35612	P35612_S701	0.51721	NA	P35612	ADDB_HUMAN	Beta-adducin (Erythrocyte adducin subunit beta)	ADD2
P35612	P35612_T533	0.853544	NA	P35612	ADDB_HUMAN	Beta-adducin (Erythrocyte adducin subunit beta)	ADD2
P35612	P35612_T611	-3.01176	NA	P35612	ADDB_HUMAN	Beta-adducin (Erythrocyte adducin subunit beta)	ADD2
P35612	P35612_T611,P35612_S617	-0.0122492	0.982965	P35612	ADDB_HUMAN	Beta-adducin (Erythrocyte adducin subunit beta)	ADD2
P35658	P35658_S1023	-3.34669	0.160422	P35658	NU214_HUMAN	Nuclear pore complex protein Nup214 (214 kDa nucleoporin) (Nucleoporin Nup214) (Protein CAN)	NUP214
P35658	P35658_S1081	-2.47348	NA	P35658	NU214_HUMAN	Nuclear pore complex protein Nup214 (214 kDa nucleoporin) (Nucleoporin Nup214) (Protein CAN)	NUP214
P35658	P35658_S433,P35658_T437	-0.949005	NA	P35658	NU214_HUMAN	Nuclear pore complex protein Nup214 (214 kDa nucleoporin) (Nucleoporin Nup214) (Protein CAN)	NUP214
P35658	P35658_S678	-0.736195	0.0612963	P35658	NU214_HUMAN	Nuclear pore complex protein Nup214 (214 kDa nucleoporin) (Nucleoporin Nup214) (Protein CAN)	NUP214
P35658	P35658_S940	-2.13651	NA	P35658	NU214_HUMAN	Nuclear pore complex protein Nup214 (214 kDa nucleoporin) (Nucleoporin Nup214) (Protein CAN)	NUP214
P35658	P35658_T670	NA	NA	P35658	NU214_HUMAN	Nuclear pore complex protein Nup214 (214 kDa nucleoporin) (Nucleoporin Nup214) (Protein CAN)	NUP214
P35658	P35658_T670,P35658_S678	-0.0141233	0.933984	P35658	NU214_HUMAN	Nuclear pore complex protein Nup214 (214 kDa nucleoporin) (Nucleoporin Nup214) (Protein CAN)	NUP214
P35659	P35659_S2	NA	NA	P35659	DEK_HUMAN	Protein DEK	DEK
P35659	P35659_S2,P35659_S4	-1.07996	0.523149	P35659	DEK_HUMAN	Protein DEK	DEK
P35659	P35659_S232	-0.568559	0.645517	P35659	DEK_HUMAN	Protein DEK	DEK
P35659	P35659_S301,P35659_S306,P35659_S307	-1.55629	0.495613	P35659	DEK_HUMAN	Protein DEK	DEK
P35659	P35659_S303,P35659_S306,P35659_S307	-1.78617	0.443759	P35659	DEK_HUMAN	Protein DEK	DEK
P35659	P35659_S303,P35659_S307	-0.482412	NA	P35659	DEK_HUMAN	Protein DEK	DEK
P35659	P35659_S306,P35659_S307	-0.255784	NA	P35659	DEK_HUMAN	Protein DEK	DEK
P35659	P35659_S51	-0.420066	0.0525571	P35659	DEK_HUMAN	Protein DEK	DEK
P35659	P35659_T13	-1.82444	NA	P35659	DEK_HUMAN	Protein DEK	DEK
P36021	P36021_S8	-1.05901	0.369446	P36021	MOT8_HUMAN	Monocarboxylate transporter 8 (MCT 8) (Monocarboxylate transporter 7) (MCT 7) (Solute carrier family 16 member 2) (X-linked PEST-containing transporter)	SLC16A2
P36507	P36507_S23	-1.08392	0.272022	P36507	MP2K2_HUMAN	Dual specificity mitogen-activated protein kinase kinase 2 (MAP kinase kinase 2) (MAPKK 2) (EC 2.7.12.2) (ERK activator kinase 2) (MAPK/ERK kinase 2) (MEK 2)	MAP2K2
P36507	P36507_T394	-0.109998	0.883021	P36507	MP2K2_HUMAN	Dual specificity mitogen-activated protein kinase kinase 2 (MAP kinase kinase 2) (MAPKK 2) (EC 2.7.12.2) (ERK activator kinase 2) (MAPK/ERK kinase 2) (MEK 2)	MAP2K2
P36578	P36578_S295	-0.211262	NA	P36578	RL4_HUMAN	60S ribosomal protein L4 (60S ribosomal protein L1)	RPL4
P36871	P36871_S117	-0.33796	NA	P36871	PGM1_HUMAN	Phosphoglucomutase-1 (PGM 1) (EC 5.4.2.2) (Glucose phosphomutase 1)	PGM1
P36915	P36915_S51	0.27592	0.784856	P36915	GNL1_HUMAN	Guanine nucleotide-binding protein-like 1 (GTP-binding protein HSR1)	GNL1
P36915	P36915_T48	0.327294	0.407851	P36915	GNL1_HUMAN	Guanine nucleotide-binding protein-like 1 (GTP-binding protein HSR1)	GNL1
P36915	P36915_T48,P36915_S51	-2.14992	0.404801	P36915	GNL1_HUMAN	Guanine nucleotide-binding protein-like 1 (GTP-binding protein HSR1)	GNL1
P36915	P36915_T48,P36915_T50	0.413748	0.046811	P36915	GNL1_HUMAN	Guanine nucleotide-binding protein-like 1 (GTP-binding protein HSR1)	GNL1
P36915	P36915_T48,P36915_T50,P36915_S51	NA	NA	P36915	GNL1_HUMAN	Guanine nucleotide-binding protein-like 1 (GTP-binding protein HSR1)	GNL1
P36915	P36915_T50	-0.319628	0.404935	P36915	GNL1_HUMAN	Guanine nucleotide-binding protein-like 1 (GTP-binding protein HSR1)	GNL1
P36915	P36915_T50,P36915_S51	0.184638	0.562588	P36915	GNL1_HUMAN	Guanine nucleotide-binding protein-like 1 (GTP-binding protein HSR1)	GNL1
P37275	P37275_S322	-1.04751	0.393298	P37275	ZEB1_HUMAN	Zinc finger E-box-binding homeobox 1 (NIL-2-A zinc finger protein) (Negative regulator of IL2) (Transcription factor 8) (TCF-8)	ZEB1
P37837	P37837_S4	0.537044	0.141882	P37837	TALDO_HUMAN	Transaldolase (EC 2.2.1.2)	TALDO1
P38159	P38159_T85	1.24779	NA	P38159	RBMX_HUMAN	RNA-binding motif protein, X chromosome (Glycoprotein p43) (Heterogeneous nuclear ribonucleoprotein G) (hnRNP G) [Cleaved into: RNA-binding motif protein, X chromosome, N-terminally processed]	RBMX
P38159;Q96E39	P38159_S208,Q96E39_S208	-0.917978	NA	P38159;Q96E39	RBMX_HUMAN;RMXL1_HUMAN	RNA-binding motif protein, X chromosome (Glycoprotein p43) (Heterogeneous nuclear ribonucleoprotein G) (hnRNP G) [Cleaved into: RNA-binding motif protein, X chromosome, N-terminally processed];"RNA binding motif protein, X-linked-like-1 (Heterogeneous nuclear ribonucleoprotein G-like 1)"	RBMX;RBMXL1
P38398	P38398_S1191	-1.12566	0.570459	P38398	BRCA1_HUMAN	Breast cancer type 1 susceptibility protein (EC 6.3.2.-) (RING finger protein 53)	BRCA1
P38398	P38398_S1342	-0.200948	0.683245	P38398	BRCA1_HUMAN	Breast cancer type 1 susceptibility protein (EC 6.3.2.-) (RING finger protein 53)	BRCA1
P38398	P38398_S1496	-0.318971	NA	P38398	BRCA1_HUMAN	Breast cancer type 1 susceptibility protein (EC 6.3.2.-) (RING finger protein 53)	BRCA1
P38432	P38432_S271	-0.362236	0.00469057	P38432	COIL_HUMAN	Coilin (p80)	COIL
P38646	P38646_S627	NA	NA	P38646	GRP75_HUMAN	Stress-70 protein, mitochondrial (75 kDa glucose-regulated protein) (GRP-75) (Heat shock 70 kDa protein 9) (Mortalin) (MOT) (Peptide-binding protein 74) (PBP74)	HSPA9
P38919	P38919_S10	NA	NA	P38919	IF4A3_HUMAN	Eukaryotic initiation factor 4A-III (eIF-4A-III) (eIF4A-III) (EC 3.6.4.13) (ATP-dependent RNA helicase DDX48) (ATP-dependent RNA helicase eIF4A-3) (DEAD box protein 48) (Eukaryotic initiation factor 4A-like NUK-34) (Eukaryotic translation initiation factor 4A isoform 3) (Nuclear matrix protein 265) (NMP 265) (hNMP 265)	EIF4A3
P39023;Q92901	P39023_S2,Q92901_S2	-1.54566	NA	P39023;Q92901	RL3_HUMAN;RL3L_HUMAN	60S ribosomal protein L3 (HIV-1 TAR RNA-binding protein B) (TARBP-B);60S ribosomal protein L3-like	RPL3;RPL3L
P39023;Q92901	P39023_S7,Q92901_S7	NA	NA	P39023;Q92901	RL3_HUMAN;RL3L_HUMAN	60S ribosomal protein L3 (HIV-1 TAR RNA-binding protein B) (TARBP-B);60S ribosomal protein L3-like	RPL3;RPL3L
P39880	P39880_S1215,P39880_S1216	-0.56155	NA	P39880	CUX1_HUMAN	Homeobox protein cut-like 1 (CCAAT displacement protein) (CDP) (Homeobox protein cux-1)	CUX1
P39880	P39880_S1270	-0.453639	0.529294	P39880	CUX1_HUMAN	Homeobox protein cut-like 1 (CCAAT displacement protein) (CDP) (Homeobox protein cux-1)	CUX1
P39880	P39880_S1454	-1.18624	0.522991	P39880	CUX1_HUMAN	Homeobox protein cut-like 1 (CCAAT displacement protein) (CDP) (Homeobox protein cux-1)	CUX1
P39880	P39880_S652	1.09062	0.246543	P39880	CUX1_HUMAN	Homeobox protein cut-like 1 (CCAAT displacement protein) (CDP) (Homeobox protein cux-1)	CUX1
P40123	P40123_S312	0.835379	0.518136	P40123	CAP2_HUMAN	Adenylyl cyclase-associated protein 2 (CAP 2)	CAP2
P40123	P40123_T311	NA	NA	P40123	CAP2_HUMAN	Adenylyl cyclase-associated protein 2 (CAP 2)	CAP2
P40222	P40222_S18	-2.59569	NA	P40222	TXLNA_HUMAN	Alpha-taxilin	TXLNA
P40222	P40222_S514	-0.974609	0.483217	P40222	TXLNA_HUMAN	Alpha-taxilin	TXLNA
P40222	P40222_S515	1.179	NA	P40222	TXLNA_HUMAN	Alpha-taxilin	TXLNA
P40306	P40306_S229	NA	NA	P40306	PSB10_HUMAN	Proteasome subunit beta type-10 (EC 3.4.25.1) (Low molecular mass protein 10) (Macropain subunit MECl-1) (Multicatalytic endopeptidase complex subunit MECl-1) (Proteasome MECl-1) (Proteasome subunit beta-2i)	PSMB10
P40425	P40425_S151	-0.0896576	NA	P40425	PBX2_HUMAN	Pre-B-cell leukemia transcription factor 2 (Homeobox protein PBX2) (Protein G17)	PBX2
P40425	P40425_S330	0.303093	0.838646	P40425	PBX2_HUMAN	Pre-B-cell leukemia transcription factor 2 (Homeobox protein PBX2) (Protein G17)	PBX2
P40763	P40763_S727	-1.81021	0.496638	P40763	STAT3_HUMAN	Signal transducer and activator of transcription 3 (Acute-phase response factor)	STAT3
P40763	P40763_Y705	NA	NA	P40763	STAT3_HUMAN	Signal transducer and activator of transcription 3 (Acute-phase response factor)	STAT3
P40818	P40818_S716	-0.412192	NA	P40818	UBP8_HUMAN	Ubiquitin carboxyl-terminal hydrolase 8 (EC 3.4.19.12) (Deubiquitinating enzyme 8) (Ubiquitin isopeptidase Y) (hUBPy) (Ubiquitin thioesterase 8) (Ubiquitin-specific-processing protease 8)	USP8
P40818	P40818_S718	-0.9964	0.625397	P40818	UBP8_HUMAN	Ubiquitin carboxyl-terminal hydrolase 8 (EC 3.4.19.12) (Deubiquitinating enzyme 8) (Ubiquitin isopeptidase Y) (hUBPy) (Ubiquitin thioesterase 8) (Ubiquitin-specific-processing protease 8)	USP8
P40818	P40818_T577	-0.226432	NA	P40818	UBP8_HUMAN	Ubiquitin carboxyl-terminal hydrolase 8 (EC 3.4.19.12) (Deubiquitinating enzyme 8) (Ubiquitin isopeptidase Y) (hUBPy) (Ubiquitin thioesterase 8) (Ubiquitin-specific-processing protease 8)	USP8
P40855	P40855_S146	-0.114324	NA	P40855	PEX19_HUMAN	Peroxisomal biogenesis factor 19 (33 kDa housekeeping protein) (Peroxin-19) (Peroxisomal farnesylated protein)	PEX19
P40855	P40855_S147	-0.539714	0.0768203	P40855	PEX19_HUMAN	Peroxisomal biogenesis factor 19 (33 kDa housekeeping protein) (Peroxin-19) (Peroxisomal farnesylated protein)	PEX19
P40855	P40855_S35	-0.607133	NA	P40855	PEX19_HUMAN	Peroxisomal biogenesis factor 19 (33 kDa housekeeping protein) (Peroxin-19) (Peroxisomal farnesylated protein)	PEX19
P40925	P40925_S241	4.06383	NA	P40925	MDHC_HUMAN	Malate dehydrogenase, cytoplasmic (EC 1.1.1.37) (Cytosolic malate dehydrogenase) (Diiodophenylpyruvate reductase) (EC 1.1.1.96)	MDH1
P41162	P41162_S159	NA	NA	P41162	ETV3_HUMAN	ETS translocation variant 3 (ETS domain transcriptional repressor PE1) (PE-1) (Mitogenic Ets transcriptional suppressor)	ETV3
P41212	P41212_S16	NA	NA	P41212	ETV6_HUMAN	Transcription factor ETV6 (ETS translocation variant 6) (ETS-related protein Tel1) (Tel)	ETV6
P41212	P41212_S16,P41212_S22	NA	NA	P41212	ETV6_HUMAN	Transcription factor ETV6 (ETS translocation variant 6) (ETS-related protein Tel1) (Tel)	ETV6
P41212	P41212_S213	1.36715	0.438757	P41212	ETV6_HUMAN	Transcription factor ETV6 (ETS translocation variant 6) (ETS-related protein Tel1) (Tel)	ETV6
P41212	P41212_T18,P41212_S22	-2.13703	NA	P41212	ETV6_HUMAN	Transcription factor ETV6 (ETS translocation variant 6) (ETS-related protein Tel1) (Tel)	ETV6
P41227	P41227_S186	1.81667	0.259492	P41227	NAA10_HUMAN	N-alpha-acetyltransferase 10 (EC 2.3.1.-) (EC 2.3.1.88) (N-terminal acetyltransferase complex ARD1 subunit homolog A) (NatA catalytic subunit)	NAA10
P41229	P41229_S1359	NA	NA	P41229	KDM5C_HUMAN	Lysine-specific demethylase 5C (EC 1.14.11.-) (Histone demethylase JARID1C) (Jumonji/ARID domain-containing protein 1C) (Protein SmcX) (Protein Xe169)	KDM5C
P41229	P41229_S301	-0.297361	0.704805	P41229	KDM5C_HUMAN	Lysine-specific demethylase 5C (EC 1.14.11.-) (Histone demethylase JARID1C) (Jumonji/ARID domain-containing protein 1C) (Protein SmcX) (Protein Xe169)	KDM5C
P41229	P41229_S317	-1.29377	0.0593457	P41229	KDM5C_HUMAN	Lysine-specific demethylase 5C (EC 1.14.11.-) (Histone demethylase JARID1C) (Jumonji/ARID domain-containing protein 1C) (Protein SmcX) (Protein Xe169)	KDM5C
P41229	P41229_S893	-1.30422	NA	P41229	KDM5C_HUMAN	Lysine-specific demethylase 5C (EC 1.14.11.-) (Histone demethylase JARID1C) (Jumonji/ARID domain-containing protein 1C) (Protein SmcX) (Protein Xe169)	KDM5C
P41229	P41229_S897	-3.00549	NA	P41229	KDM5C_HUMAN	Lysine-specific demethylase 5C (EC 1.14.11.-) (Histone demethylase JARID1C) (Jumonji/ARID domain-containing protein 1C) (Protein SmcX) (Protein Xe169)	KDM5C
P42166	P42166_S184	2.2219	NA	P42166	LAP2A_HUMAN	Lamina-associated polypeptide 2, isoform alpha (Thymopoietin isoform alpha) (TP alpha) (Thymopoietin-related peptide isoform alpha) (TPRP isoform alpha) [Cleaved into: Thymopoietin (TP) (Splenin); Thymopentin (TP5)]	TMPO
P42166	P42166_S180	-0.112838	NA	P42166	LAP2A_HUMAN	Lamina-associated polypeptide 2, isoform alpha (Thymopoietin isoform alpha) (TP alpha) (Thymopoietin-related peptide isoform alpha) (TPRP isoform alpha) [Cleaved into: Thymopoietin (TP) (Splenin); Thymopentin (TP5)]	TMPO
P42166	P42166_S436	0.245359	0.480304	P42166	LAP2A_HUMAN	Lamina-associated polypeptide 2, isoform alpha (Thymopoietin isoform alpha) (TP alpha) (Thymopoietin-related peptide isoform alpha) (TPRP isoform alpha) [Cleaved into: Thymopoietin (TP) (Splenin); Thymopentin (TP5)]	TMPO
P42166	P42166_S310	-0.615037	0.836313	P42166	LAP2A_HUMAN	Lamina-associated polypeptide 2, isoform alpha (Thymopoietin isoform alpha) (TP alpha) (Thymopoietin-related peptide isoform alpha) (TPRP isoform alpha) [Cleaved into: Thymopoietin (TP) (Splenin); Thymopentin (TP5)]	TMPO
P42166	P42166_S351	NA	NA	P42166	LAP2A_HUMAN	Lamina-associated polypeptide 2, isoform alpha (Thymopoietin isoform alpha) (TP alpha) (Thymopoietin-related peptide isoform alpha) (TPRP isoform alpha) [Cleaved into: Thymopoietin (TP) (Splenin); Thymopentin (TP5)]	TMPO
P42166	P42166_S424	-1.5548	0.1773	P42166	LAP2A_HUMAN	Lamina-associated polypeptide 2, isoform alpha (Thymopoietin isoform alpha) (TP alpha) (Thymopoietin-related peptide isoform alpha) (TPRP isoform alpha) [Cleaved into: Thymopoietin (TP) (Splenin); Thymopentin (TP5)]	TMPO
P42166;P42167	P42166_S158,P42166_S159,P42167_S158,P42167_S159	-1.0328	0.399139	P42166;P42167	LAP2A_HUMAN;LAP2B_HUMAN	Lamina-associated polypeptide 2, isoform alpha (Thymopoietin isoform alpha) (TP alpha) (Thymopoietin-related peptide isoform alpha) (TPRP isoform alpha) [Cleaved into: Thymopoietin (TP) (Splenin); Thymopentin (TP5)];"Lamina-associated polypeptide 2, isoforms beta/gamma (Thymopoietin, isoforms beta/gamma) (TP beta/gamma) (Thymopoietin-related peptide isoforms beta/gamma) (TPRP isoforms beta/gamma)…	TMPO;TMPO
P42166;P42167	P42166_S158,P42167_S158	-0.869366	NA	P42166;P42167	LAP2A_HUMAN;LAP2B_HUMAN	Lamina-associated polypeptide 2, isoform alpha (Thymopoietin isoform alpha) (TP alpha) (Thymopoietin-related peptide isoform alpha) (TPRP isoform alpha) [Cleaved into: Thymopoietin (TP) (Splenin); Thymopentin (TP5)];"Lamina-associated polypeptide 2, isoforms beta/gamma (Thymopoietin, isoforms beta/gamma) (TP beta/gamma) (Thymopoietin-related peptide isoforms beta/gamma) (TPRP isoforms beta/gamma)…	TMPO;TMPO
P42166;P42167	P42166_S168,P42167_S168	NA	NA	P42166;P42167	LAP2A_HUMAN;LAP2B_HUMAN	Lamina-associated polypeptide 2, isoform alpha (Thymopoietin isoform alpha) (TP alpha) (Thymopoietin-related peptide isoform alpha) (TPRP isoform alpha) [Cleaved into: Thymopoietin (TP) (Splenin); Thymopentin (TP5)];"Lamina-associated polypeptide 2, isoforms beta/gamma (Thymopoietin, isoforms beta/gamma) (TP beta/gamma) (Thymopoietin-related peptide isoforms beta/gamma) (TPRP isoforms beta/gamma)…	TMPO;TMPO
P42166;P42167	P42166_S66,P42167_S66	1.03907	0.602248	P42166;P42167	LAP2A_HUMAN;LAP2B_HUMAN	Lamina-associated polypeptide 2, isoform alpha (Thymopoietin isoform alpha) (TP alpha) (Thymopoietin-related peptide isoform alpha) (TPRP isoform alpha) [Cleaved into: Thymopoietin (TP) (Splenin); Thymopentin (TP5)];"Lamina-associated polypeptide 2, isoforms beta/gamma (Thymopoietin, isoforms beta/gamma) (TP beta/gamma) (Thymopoietin-related peptide isoforms beta/gamma) (TPRP isoforms beta/gamma)…	TMPO;TMPO
P42166;P42167	P42166_S67,P42167_S67	-1.35387	0.181161	P42166;P42167	LAP2A_HUMAN;LAP2B_HUMAN	Lamina-associated polypeptide 2, isoform alpha (Thymopoietin isoform alpha) (TP alpha) (Thymopoietin-related peptide isoform alpha) (TPRP isoform alpha) [Cleaved into: Thymopoietin (TP) (Splenin); Thymopentin (TP5)];"Lamina-associated polypeptide 2, isoforms beta/gamma (Thymopoietin, isoforms beta/gamma) (TP beta/gamma) (Thymopoietin-related peptide isoforms beta/gamma) (TPRP isoforms beta/gamma)…	TMPO;TMPO
P42166;P42167	P42166_S66,P42166_S67,P42166_T74,P42167_S66,P42167_S67,P42167_T74	-3.7069	NA	P42166;P42167	LAP2A_HUMAN;LAP2B_HUMAN	Lamina-associated polypeptide 2, isoform alpha (Thymopoietin isoform alpha) (TP alpha) (Thymopoietin-related peptide isoform alpha) (TPRP isoform alpha) [Cleaved into: Thymopoietin (TP) (Splenin); Thymopentin (TP5)];"Lamina-associated polypeptide 2, isoforms beta/gamma (Thymopoietin, isoforms beta/gamma) (TP beta/gamma) (Thymopoietin-related peptide isoforms beta/gamma) (TPRP isoforms beta/gamma)…	TMPO;TMPO
P42166;P42167	P42166_S66,P42166_S67,P42167_S66,P42167_S67	0.0122124	0.99191	P42166;P42167	LAP2A_HUMAN;LAP2B_HUMAN	Lamina-associated polypeptide 2, isoform alpha (Thymopoietin isoform alpha) (TP alpha) (Thymopoietin-related peptide isoform alpha) (TPRP isoform alpha) [Cleaved into: Thymopoietin (TP) (Splenin); Thymopentin (TP5)];"Lamina-associated polypeptide 2, isoforms beta/gamma (Thymopoietin, isoforms beta/gamma) (TP beta/gamma) (Thymopoietin-related peptide isoforms beta/gamma) (TPRP isoforms beta/gamma)…	TMPO;TMPO
P42166;P42167	P42166_T74,P42167_T74	-0.93676	0.187737	P42166;P42167	LAP2A_HUMAN;LAP2B_HUMAN	Lamina-associated polypeptide 2, isoform alpha (Thymopoietin isoform alpha) (TP alpha) (Thymopoietin-related peptide isoform alpha) (TPRP isoform alpha) [Cleaved into: Thymopoietin (TP) (Splenin); Thymopentin (TP5)];"Lamina-associated polypeptide 2, isoforms beta/gamma (Thymopoietin, isoforms beta/gamma) (TP beta/gamma) (Thymopoietin-related peptide isoforms beta/gamma) (TPRP isoforms beta/gamma)…	TMPO;TMPO
P42166;P42167	P42166_S79,P42167_S79	0.122677	0.858116	P42166;P42167	LAP2A_HUMAN;LAP2B_HUMAN	Lamina-associated polypeptide 2, isoform alpha (Thymopoietin isoform alpha) (TP alpha) (Thymopoietin-related peptide isoform alpha) (TPRP isoform alpha) [Cleaved into: Thymopoietin (TP) (Splenin); Thymopentin (TP5)];"Lamina-associated polypeptide 2, isoforms beta/gamma (Thymopoietin, isoforms beta/gamma) (TP beta/gamma) (Thymopoietin-related peptide isoforms beta/gamma) (TPRP isoforms beta/gamma)…	TMPO;TMPO
P42166;P42167	P42166_T160,P42167_T160	NA	NA	P42166;P42167	LAP2A_HUMAN;LAP2B_HUMAN	Lamina-associated polypeptide 2, isoform alpha (Thymopoietin isoform alpha) (TP alpha) (Thymopoietin-related peptide isoform alpha) (TPRP isoform alpha) [Cleaved into: Thymopoietin (TP) (Splenin); Thymopentin (TP5)];"Lamina-associated polypeptide 2, isoforms beta/gamma (Thymopoietin, isoforms beta/gamma) (TP beta/gamma) (Thymopoietin-related peptide isoforms beta/gamma) (TPRP isoforms beta/gamma)…	TMPO;TMPO
P42167	P42167_S180	1.62421	NA	P42167	LAP2B_HUMAN	Lamina-associated polypeptide 2, isoforms beta/gamma (Thymopoietin, isoforms beta/gamma) (TP beta/gamma) (Thymopoietin-related peptide isoforms beta/gamma) (TPRP isoforms beta/gamma) [Cleaved into: Thymopoietin (TP) (Splenin); Thymopentin (TP5)]	TMPO
P42167	P42167_S180,P42167_S184	0.633101	NA	P42167	LAP2B_HUMAN	Lamina-associated polypeptide 2, isoforms beta/gamma (Thymopoietin, isoforms beta/gamma) (TP beta/gamma) (Thymopoietin-related peptide isoforms beta/gamma) (TPRP isoforms beta/gamma) [Cleaved into: Thymopoietin (TP) (Splenin); Thymopentin (TP5)]	TMPO
P42167	P42167_S184	0.755008	0.745984	P42167	LAP2B_HUMAN	Lamina-associated polypeptide 2, isoforms beta/gamma (Thymopoietin, isoforms beta/gamma) (TP beta/gamma) (Thymopoietin-related peptide isoforms beta/gamma) (TPRP isoforms beta/gamma) [Cleaved into: Thymopoietin (TP) (Splenin); Thymopentin (TP5)]	TMPO
P42167	P42167_S306	-0.854427	0.562851	P42167	LAP2B_HUMAN	Lamina-associated polypeptide 2, isoforms beta/gamma (Thymopoietin, isoforms beta/gamma) (TP beta/gamma) (Thymopoietin-related peptide isoforms beta/gamma) (TPRP isoforms beta/gamma) [Cleaved into: Thymopoietin (TP) (Splenin); Thymopentin (TP5)]	TMPO
P42167	P42167_T208	2.41263	NA	P42167	LAP2B_HUMAN	Lamina-associated polypeptide 2, isoforms beta/gamma (Thymopoietin, isoforms beta/gamma) (TP beta/gamma) (Thymopoietin-related peptide isoforms beta/gamma) (TPRP isoforms beta/gamma) [Cleaved into: Thymopoietin (TP) (Splenin); Thymopentin (TP5)]	TMPO
P42345	P42345_T1162	-5.8622	NA	P42345	MTOR_HUMAN	Serine/threonine-protein kinase mTOR (EC 2.7.11.1) (FK506-binding protein 12-rapamycin complex-associated protein 1) (FKBP12-rapamycin complex-associated protein) (Mammalian target of rapamycin) (mTOR) (Mechanistic target of rapamycin) (Rapamycin and FKBP12 target 1) (Rapamycin target protein 1)	MTOR
P42356	P42356_S172	NA	NA	P42356	PI4KA_HUMAN	Phosphatidylinositol 4-kinase alpha (PI4-kinase alpha) (PI4K-alpha) (PtdIns-4-kinase alpha) (EC 2.7.1.67)	PI4KA
P42566	P42566_S562	-2.6107	NA	P42566	EPS15_HUMAN	Epidermal growth factor receptor substrate 15 (Protein Eps15) (Protein AF-1p)	EPS15
P42566	P42566_S814	NA	NA	P42566	EPS15_HUMAN	Epidermal growth factor receptor substrate 15 (Protein Eps15) (Protein AF-1p)	EPS15
P42566	P42566_T777	-0.877403	0.446985	P42566	EPS15_HUMAN	Epidermal growth factor receptor substrate 15 (Protein Eps15) (Protein AF-1p)	EPS15
P42568	P42568_S483	-0.547527	0.301859	P42568	AF9_HUMAN	Protein AF-9 (ALL1-fused gene from chromosome 9 protein) (Myeloid/lymphoid or mixed-lineage leukemia translocated to chromosome 3 protein) (YEATS domain-containing protein 3)	MLLT3
P42677	P42677_S11	-1.35632	0.22507	P42677	RS27_HUMAN	40S ribosomal protein S27 (Metallopan-stimulin 1) (MPS-1)	RPS27
P42677;Q71UM5	P42677_S78,Q71UM5_S78	-1.05147	0.152564	P42677;Q71UM5	RS27_HUMAN;RS27L_HUMAN	40S ribosomal protein S27 (Metallopan-stimulin 1) (MPS-1);40S ribosomal protein S27-like	RPS27;RPS27L
P42684	P42684_S631	-0.992772	0.215442	P42684	ABL2_HUMAN	Abelson tyrosine-protein kinase 2 (EC 2.7.10.2) (Abelson murine leukemia viral oncogene homolog 2) (Abelson-related gene protein) (Tyrosine-protein kinase ARG)	ABL2
P42684	P42684_S817,P42684_S820	NA	NA	P42684	ABL2_HUMAN	Abelson tyrosine-protein kinase 2 (EC 2.7.10.2) (Abelson murine leukemia viral oncogene homolog 2) (Abelson-related gene protein) (Tyrosine-protein kinase ARG)	ABL2
P42694	P42694_S1320	NA	NA	P42694	HELZ_HUMAN	Probable helicase with zinc finger domain (EC 3.6.4.-) (Down-regulated in human cancers protein)	HELZ
P42694	P42694_S1614	-0.834105	NA	P42694	HELZ_HUMAN	Probable helicase with zinc finger domain (EC 3.6.4.-) (Down-regulated in human cancers protein)	HELZ
P42694	P42694_S1763	1.2788	NA	P42694	HELZ_HUMAN	Probable helicase with zinc finger domain (EC 3.6.4.-) (Down-regulated in human cancers protein)	HELZ
P42695	P42695_S1328	-0.381917	0.423585	P42695	CNDD3_HUMAN	Condensin-2 complex subunit D3 (Non-SMC condensin II complex subunit D3) (hCAP-D3)	NCAPD3
P42695	P42695_S1372	-1.34644	NA	P42695	CNDD3_HUMAN	Condensin-2 complex subunit D3 (Non-SMC condensin II complex subunit D3) (hCAP-D3)	NCAPD3
P42695	P42695_S1384	NA	NA	P42695	CNDD3_HUMAN	Condensin-2 complex subunit D3 (Non-SMC condensin II complex subunit D3) (hCAP-D3)	NCAPD3
P42695	P42695_T1379	-0.538485	0.538542	P42695	CNDD3_HUMAN	Condensin-2 complex subunit D3 (Non-SMC condensin II complex subunit D3) (hCAP-D3)	NCAPD3
P42696	P42696_S14	0.226713	0.742412	P42696	RBM34_HUMAN	RNA-binding protein 34 (RNA-binding motif protein 34)	RBM34
P42696	P42696_S14,P42696_S28	-0.372894	NA	P42696	RBM34_HUMAN	RNA-binding protein 34 (RNA-binding motif protein 34)	RBM34
P42858	P42858_S1199	-0.492885	0.400869	P42858	HD_HUMAN	Huntingtin (Huntington disease protein) (HD protein)	HTT
P42858	P42858_S417	-1.32155	NA	P42858	HD_HUMAN	Huntingtin (Huntington disease protein) (HD protein)	HTT
P42858	P42858_S419,P42858_S430	-6.59882	NA	P42858	HD_HUMAN	Huntingtin (Huntington disease protein) (HD protein)	HTT
P42858	P42858_S419,P42858_S432	-0.765283	0.810194	P42858	HD_HUMAN	Huntingtin (Huntington disease protein) (HD protein)	HTT
P42858	P42858_S640	-2.27745	NA	P42858	HD_HUMAN	Huntingtin (Huntington disease protein) (HD protein)	HTT
P42892	P42892_T25	-5.13949	NA	P42892	ECE1_HUMAN	Endothelin-converting enzyme 1 (ECE-1) (EC 3.4.24.71)	ECE1
P43243	P43243_S164	NA	NA	P43243	MATR3_HUMAN	Matrin-3	MATR3
P43243	P43243_S188	0.521354	0.58445	P43243	MATR3_HUMAN	Matrin-3	MATR3
P43243	P43243_S195	-2.25478	NA	P43243	MATR3_HUMAN	Matrin-3	MATR3
P43243	P43243_S208	0.614545	NA	P43243	MATR3_HUMAN	Matrin-3	MATR3
P43243	P43243_S4,P43243_S8,P43243_S11	2.48769	NA	P43243	MATR3_HUMAN	Matrin-3	MATR3
P43243	P43243_S596	0.00214136	NA	P43243	MATR3_HUMAN	Matrin-3	MATR3
P43243	P43243_S596,P43243_S598	3.17101	0.144754	P43243	MATR3_HUMAN	Matrin-3	MATR3
P43243	P43243_S596,P43243_S598,P43243_S604	2.66056	NA	P43243	MATR3_HUMAN	Matrin-3	MATR3
P43243	P43243_S596,P43243_Y597	NA	NA	P43243	MATR3_HUMAN	Matrin-3	MATR3
P43243	P43243_S598	0.738971	0.549992	P43243	MATR3_HUMAN	Matrin-3	MATR3
P43243	P43243_S598,P43243_S604	0.0705519	0.912744	P43243	MATR3_HUMAN	Matrin-3	MATR3
P43243	P43243_S604	0.692917	0.653853	P43243	MATR3_HUMAN	Matrin-3	MATR3
P43243	P43243_S8	-0.284215	NA	P43243	MATR3_HUMAN	Matrin-3	MATR3
P43243	P43243_S9	-0.704852	NA	P43243	MATR3_HUMAN	Matrin-3	MATR3
P43243	P43243_T150	-0.132615	0.566387	P43243	MATR3_HUMAN	Matrin-3	MATR3
P43307	P43307_S268	-1.11998	0.640112	P43307	SSRA_HUMAN	Translocon-associated protein subunit alpha (TRAP-alpha) (Signal sequence receptor subunit alpha) (SSR-alpha)	SSR1
P43487	P43487_S14	-3.08462	NA	P43487	RANG_HUMAN	Ran-specific GTPase-activating protein (Ran-binding protein 1) (RanBP1)	RANBP1
P43487	P43487_S60	-0.232122	NA	P43487	RANG_HUMAN	Ran-specific GTPase-activating protein (Ran-binding protein 1) (RanBP1)	RANBP1
P43487	P43487_T13	0.701194	NA	P43487	RANG_HUMAN	Ran-specific GTPase-activating protein (Ran-binding protein 1) (RanBP1)	RANBP1
P43487;Q9C010	P43487_S188,Q9C010_S53	NA	NA	P43487;Q9C010	RANG_HUMAN;IPKB_HUMAN	Ran-specific GTPase-activating protein (Ran-binding protein 1) (RanBP1);cAMP-dependent protein kinase inhibitor beta (PKI-beta)	RANBP1;PKIB
P43490	P43490_S472	-1.08272	0.282697	P43490	NAMPT_HUMAN	Nicotinamide phosphoribosyltransferase (NAmPRTase) (Nampt) (EC 2.4.2.12) (Pre-B-cell colony-enhancing factor 1) (Pre-B cell-enhancing factor) (Visfatin)	NAMPT
P45985	P45985_S80	0.00770498	0.982117	P45985	MP2K4_HUMAN	Dual specificity mitogen-activated protein kinase kinase 4 (MAP kinase kinase 4) (MAPKK 4) (EC 2.7.12.2) (JNK-activating kinase 1) (MAPK/ERK kinase 4) (MEK 4) (SAPK/ERK kinase 1) (SEK1) (Stress-activated protein kinase kinase 1) (SAPK kinase 1) (SAPKK-1) (SAPKK1) (c-Jun N-terminal kinase kinase 1) (JNKK)	MAP2K4
P46013	P46013_S1071	NA	NA	P46013	KI67_HUMAN	Antigen KI-67	MKI67
P46013	P46013_S1131	-0.302919	0.812651	P46013	KI67_HUMAN	Antigen KI-67	MKI67
P46013	P46013_S1375	-0.263265	NA	P46013	KI67_HUMAN	Antigen KI-67	MKI67
P46013	P46013_S1861	-0.133754	0.875462	P46013	KI67_HUMAN	Antigen KI-67	MKI67
P46013	P46013_S2105	-1.63051	NA	P46013	KI67_HUMAN	Antigen KI-67	MKI67
P46013	P46013_S2223	NA	NA	P46013	KI67_HUMAN	Antigen KI-67	MKI67
P46013	P46013_S2344	1.43441	NA	P46013	KI67_HUMAN	Antigen KI-67	MKI67
P46013	P46013_S2528	-0.230548	0.600787	P46013	KI67_HUMAN	Antigen KI-67	MKI67
P46013	P46013_S2638	3.46259	NA	P46013	KI67_HUMAN	Antigen KI-67	MKI67
P46013	P46013_S308	-0.576454	0.543245	P46013	KI67_HUMAN	Antigen KI-67	MKI67
P46013	P46013_S357	-1.29087	NA	P46013	KI67_HUMAN	Antigen KI-67	MKI67
P46013	P46013_S579	-1.60898	0.0714609	P46013	KI67_HUMAN	Antigen KI-67	MKI67
P46013	P46013_S827	-0.510625	0.402522	P46013	KI67_HUMAN	Antigen KI-67	MKI67
P46013	P46013_T2504	1.44077	0.335285	P46013	KI67_HUMAN	Antigen KI-67	MKI67
P46013	P46013_T858	0.499458	0.595152	P46013	KI67_HUMAN	Antigen KI-67	MKI67
P46019	P46019_S1015	NA	NA	P46019	KPB2_HUMAN	Phosphorylase b kinase regulatory subunit alpha, liver isoform (Phosphorylase kinase alpha L subunit)	PHKA2
P46019	P46019_S1039	-1.38564	NA	P46019	KPB2_HUMAN	Phosphorylase b kinase regulatory subunit alpha, liver isoform (Phosphorylase kinase alpha L subunit)	PHKA2
P46019	P46019_S1044	-0.201188	0.900143	P46019	KPB2_HUMAN	Phosphorylase b kinase regulatory subunit alpha, liver isoform (Phosphorylase kinase alpha L subunit)	PHKA2
P46019	P46019_T1041,P46019_S1044	0.133546	NA	P46019	KPB2_HUMAN	Phosphorylase b kinase regulatory subunit alpha, liver isoform (Phosphorylase kinase alpha L subunit)	PHKA2
P46019;P46020	P46019_S7,P46020_S7	-1.40412	0.18972	P46019;P46020	KPB2_HUMAN;KPB1_HUMAN	Phosphorylase b kinase regulatory subunit alpha, liver isoform (Phosphorylase kinase alpha L subunit);"Phosphorylase b kinase regulatory subunit alpha, skeletal muscle isoform (Phosphorylase kinase alpha M subunit)"	PHKA2;PHKA1
P46060	P46060_S427	-3.40997	NA	P46060	RAGP1_HUMAN	Ran GTPase-activating protein 1 (RanGAP1)	RANGAP1
P46060	P46060_S428,P46060_S442	-0.0130074	NA	P46060	RAGP1_HUMAN	Ran GTPase-activating protein 1 (RanGAP1)	RANGAP1
P46060	P46060_S442	-1.59652	NA	P46060	RAGP1_HUMAN	Ran GTPase-activating protein 1 (RanGAP1)	RANGAP1
P46087	P46087_S181	-1.30316	NA	P46087	NOP2_HUMAN	Putative ribosomal RNA methyltransferase NOP2 (EC 2.1.1.-) (Nucleolar protein 1) (Nucleolar protein 2 homolog) (Proliferating-cell nucleolar antigen p120) (Proliferation-associated nucleolar protein p120)	NOP2
P46087	P46087_S58	-0.810147	0.273003	P46087	NOP2_HUMAN	Putative ribosomal RNA methyltransferase NOP2 (EC 2.1.1.-) (Nucleolar protein 1) (Nucleolar protein 2 homolog) (Proliferating-cell nucleolar antigen p120) (Proliferation-associated nucleolar protein p120)	NOP2
P46087	P46087_S67	1.82822	0.122961	P46087	NOP2_HUMAN	Putative ribosomal RNA methyltransferase NOP2 (EC 2.1.1.-) (Nucleolar protein 1) (Nucleolar protein 2 homolog) (Proliferating-cell nucleolar antigen p120) (Proliferation-associated nucleolar protein p120)	NOP2
P46087	P46087_S786	0.0977756	0.614027	P46087	NOP2_HUMAN	Putative ribosomal RNA methyltransferase NOP2 (EC 2.1.1.-) (Nucleolar protein 1) (Nucleolar protein 2 homolog) (Proliferating-cell nucleolar antigen p120) (Proliferation-associated nucleolar protein p120)	NOP2
P46087	P46087_S801	NA	NA	P46087	NOP2_HUMAN	Putative ribosomal RNA methyltransferase NOP2 (EC 2.1.1.-) (Nucleolar protein 1) (Nucleolar protein 2 homolog) (Proliferating-cell nucleolar antigen p120) (Proliferation-associated nucleolar protein p120)	NOP2
P46087	P46087_T195	0.631788	0.625005	P46087	NOP2_HUMAN	Putative ribosomal RNA methyltransferase NOP2 (EC 2.1.1.-) (Nucleolar protein 1) (Nucleolar protein 2 homolog) (Proliferating-cell nucleolar antigen p120) (Proliferation-associated nucleolar protein p120)	NOP2
P46100	P46100_S1061	-0.0948803	0.837194	P46100	ATRX_HUMAN	Transcriptional regulator ATRX (EC 3.6.4.12) (ATP-dependent helicase ATRX) (X-linked helicase II) (X-linked nuclear protein) (XNP) (Znf-HX)	ATRX
P46100	P46100_S1348,P46100_S1352	1.08682	NA	P46100	ATRX_HUMAN	Transcriptional regulator ATRX (EC 3.6.4.12) (ATP-dependent helicase ATRX) (X-linked helicase II) (X-linked nuclear protein) (XNP) (Znf-HX)	ATRX
P46100	P46100_S1527	-1.8362	0.222236	P46100	ATRX_HUMAN	Transcriptional regulator ATRX (EC 3.6.4.12) (ATP-dependent helicase ATRX) (X-linked helicase II) (X-linked nuclear protein) (XNP) (Znf-HX)	ATRX
P46100	P46100_S313	NA	NA	P46100	ATRX_HUMAN	Transcriptional regulator ATRX (EC 3.6.4.12) (ATP-dependent helicase ATRX) (X-linked helicase II) (X-linked nuclear protein) (XNP) (Znf-HX)	ATRX
P46100	P46100_S316	-0.164832	NA	P46100	ATRX_HUMAN	Transcriptional regulator ATRX (EC 3.6.4.12) (ATP-dependent helicase ATRX) (X-linked helicase II) (X-linked nuclear protein) (XNP) (Znf-HX)	ATRX
P46100	P46100_S34	-0.317626	NA	P46100	ATRX_HUMAN	Transcriptional regulator ATRX (EC 3.6.4.12) (ATP-dependent helicase ATRX) (X-linked helicase II) (X-linked nuclear protein) (XNP) (Znf-HX)	ATRX
P46100	P46100_S598	-2.56436	NA	P46100	ATRX_HUMAN	Transcriptional regulator ATRX (EC 3.6.4.12) (ATP-dependent helicase ATRX) (X-linked helicase II) (X-linked nuclear protein) (XNP) (Znf-HX)	ATRX
P46100	P46100_S677	-0.601396	0.54063	P46100	ATRX_HUMAN	Transcriptional regulator ATRX (EC 3.6.4.12) (ATP-dependent helicase ATRX) (X-linked helicase II) (X-linked nuclear protein) (XNP) (Znf-HX)	ATRX
P46100	P46100_S703	-0.72514	NA	P46100	ATRX_HUMAN	Transcriptional regulator ATRX (EC 3.6.4.12) (ATP-dependent helicase ATRX) (X-linked helicase II) (X-linked nuclear protein) (XNP) (Znf-HX)	ATRX
P46100	P46100_S704	NA	NA	P46100	ATRX_HUMAN	Transcriptional regulator ATRX (EC 3.6.4.12) (ATP-dependent helicase ATRX) (X-linked helicase II) (X-linked nuclear protein) (XNP) (Znf-HX)	ATRX
P46100	P46100_S706	-0.675538	NA	P46100	ATRX_HUMAN	Transcriptional regulator ATRX (EC 3.6.4.12) (ATP-dependent helicase ATRX) (X-linked helicase II) (X-linked nuclear protein) (XNP) (Znf-HX)	ATRX
P46100	P46100_S819	-0.471561	0.648678	P46100	ATRX_HUMAN	Transcriptional regulator ATRX (EC 3.6.4.12) (ATP-dependent helicase ATRX) (X-linked helicase II) (X-linked nuclear protein) (XNP) (Znf-HX)	ATRX
P46100	P46100_S84	-0.486736	NA	P46100	ATRX_HUMAN	Transcriptional regulator ATRX (EC 3.6.4.12) (ATP-dependent helicase ATRX) (X-linked helicase II) (X-linked nuclear protein) (XNP) (Znf-HX)	ATRX
P46100	P46100_S889	-0.0845336	NA	P46100	ATRX_HUMAN	Transcriptional regulator ATRX (EC 3.6.4.12) (ATP-dependent helicase ATRX) (X-linked helicase II) (X-linked nuclear protein) (XNP) (Znf-HX)	ATRX
P46100	P46100_S890	-5.33614	NA	P46100	ATRX_HUMAN	Transcriptional regulator ATRX (EC 3.6.4.12) (ATP-dependent helicase ATRX) (X-linked helicase II) (X-linked nuclear protein) (XNP) (Znf-HX)	ATRX
P46100	P46100_S92	2.52356	NA	P46100	ATRX_HUMAN	Transcriptional regulator ATRX (EC 3.6.4.12) (ATP-dependent helicase ATRX) (X-linked helicase II) (X-linked nuclear protein) (XNP) (Znf-HX)	ATRX
P46100	P46100_S925	0.143131	0.839858	P46100	ATRX_HUMAN	Transcriptional regulator ATRX (EC 3.6.4.12) (ATP-dependent helicase ATRX) (X-linked helicase II) (X-linked nuclear protein) (XNP) (Znf-HX)	ATRX
P46100	P46100_T1346,P46100_S1352	0.549846	0.311952	P46100	ATRX_HUMAN	Transcriptional regulator ATRX (EC 3.6.4.12) (ATP-dependent helicase ATRX) (X-linked helicase II) (X-linked nuclear protein) (XNP) (Znf-HX)	ATRX
P46100	P46100_T887	-0.932398	0.476679	P46100	ATRX_HUMAN	Transcriptional regulator ATRX (EC 3.6.4.12) (ATP-dependent helicase ATRX) (X-linked helicase II) (X-linked nuclear protein) (XNP) (Znf-HX)	ATRX
P46379	P46379_S1081	0.0147597	NA	P46379	BAG6_HUMAN	Large proline-rich protein BAG6 (BAG family molecular chaperone regulator 6) (BCL2-associated athanogene 6) (BAG-6) (BAG6) (HLA-B-associated transcript 3) (Protein G3) (Protein Scythe)	BAG6
P46379	P46379_S1117	-0.601048	0.346368	P46379	BAG6_HUMAN	Large proline-rich protein BAG6 (BAG family molecular chaperone regulator 6) (BCL2-associated athanogene 6) (BAG-6) (BAG6) (HLA-B-associated transcript 3) (Protein G3) (Protein Scythe)	BAG6
P46379	P46379_S113	-2.54459	0.0691346	P46379	BAG6_HUMAN	Large proline-rich protein BAG6 (BAG family molecular chaperone regulator 6) (BCL2-associated athanogene 6) (BAG-6) (BAG6) (HLA-B-associated transcript 3) (Protein G3) (Protein Scythe)	BAG6
P46379	P46379_S964	-0.595396	0.806822	P46379	BAG6_HUMAN	Large proline-rich protein BAG6 (BAG family molecular chaperone regulator 6) (BCL2-associated athanogene 6) (BAG-6) (BAG6) (HLA-B-associated transcript 3) (Protein G3) (Protein Scythe)	BAG6
P46379	P46379_S964,P46379_S973	NA	NA	P46379	BAG6_HUMAN	Large proline-rich protein BAG6 (BAG family molecular chaperone regulator 6) (BCL2-associated athanogene 6) (BAG-6) (BAG6) (HLA-B-associated transcript 3) (Protein G3) (Protein Scythe)	BAG6
P46379	P46379_S973	0.0423646	0.930409	P46379	BAG6_HUMAN	Large proline-rich protein BAG6 (BAG family molecular chaperone regulator 6) (BCL2-associated athanogene 6) (BAG-6) (BAG6) (HLA-B-associated transcript 3) (Protein G3) (Protein Scythe)	BAG6
P46379	P46379_T1080	-0.226698	NA	P46379	BAG6_HUMAN	Large proline-rich protein BAG6 (BAG family molecular chaperone regulator 6) (BCL2-associated athanogene 6) (BAG-6) (BAG6) (HLA-B-associated transcript 3) (Protein G3) (Protein Scythe)	BAG6
P46527	P46527_S10	-0.287359	0.770545	P46527	CDN1B_HUMAN	Cyclin-dependent kinase inhibitor 1B (Cyclin-dependent kinase inhibitor p27) (p27Kip1)	CDKN1B
P46527	P46527_S178	NA	NA	P46527	CDN1B_HUMAN	Cyclin-dependent kinase inhibitor 1B (Cyclin-dependent kinase inhibitor p27) (p27Kip1)	CDKN1B
P46777	P46777_S286	4.79421	NA	P46777	RL5_HUMAN	60S ribosomal protein L5	RPL5
P46779	P46779_S115	2.16911	NA	P46779	RL28_HUMAN	60S ribosomal protein L28	RPL28
P46783;Q9NQ39	P46783_S146,Q9NQ39_S157	-0.514496	0.498709	P46783;Q9NQ39	RS10_HUMAN;RS10L_HUMAN	40S ribosomal protein S10;Putative 40S ribosomal protein S10-like	RPS10;RPS10P5
P46821	P46821_S1101	-0.149557	0.785402	P46821	MAP1B_HUMAN	Microtubule-associated protein 1B (MAP-1B) [Cleaved into: MAP1B heavy chain; MAP1 light chain LC1]	MAP1B
P46821	P46821_S1244,P46821_S1256,P46821_S1265	-1.23011	NA	P46821	MAP1B_HUMAN	Microtubule-associated protein 1B (MAP-1B) [Cleaved into: MAP1B heavy chain; MAP1 light chain LC1]	MAP1B
P46821	P46821_S1252,P46821_S1265	1.00294	NA	P46821	MAP1B_HUMAN	Microtubule-associated protein 1B (MAP-1B) [Cleaved into: MAP1B heavy chain; MAP1 light chain LC1]	MAP1B
P46821	P46821_S1254,P46821_S1256	NA	NA	P46821	MAP1B_HUMAN	Microtubule-associated protein 1B (MAP-1B) [Cleaved into: MAP1B heavy chain; MAP1 light chain LC1]	MAP1B
P46821	P46821_S1258,P46821_S1260,P46821_S1265	2.02964	NA	P46821	MAP1B_HUMAN	Microtubule-associated protein 1B (MAP-1B) [Cleaved into: MAP1B heavy chain; MAP1 light chain LC1]	MAP1B
P46821	P46821_S1258,P46821_S1262	-3.34379	NA	P46821	MAP1B_HUMAN	Microtubule-associated protein 1B (MAP-1B) [Cleaved into: MAP1B heavy chain; MAP1 light chain LC1]	MAP1B
P46821	P46821_S1265	-0.31866	0.70473	P46821	MAP1B_HUMAN	Microtubule-associated protein 1B (MAP-1B) [Cleaved into: MAP1B heavy chain; MAP1 light chain LC1]	MAP1B
P46821	P46821_S1298	1.40304	0.680139	P46821	MAP1B_HUMAN	Microtubule-associated protein 1B (MAP-1B) [Cleaved into: MAP1B heavy chain; MAP1 light chain LC1]	MAP1B
P46821	P46821_S1298,P46821_S1312	-0.121207	NA	P46821	MAP1B_HUMAN	Microtubule-associated protein 1B (MAP-1B) [Cleaved into: MAP1B heavy chain; MAP1 light chain LC1]	MAP1B
P46821	P46821_S1312	-6.2053	NA	P46821	MAP1B_HUMAN	Microtubule-associated protein 1B (MAP-1B) [Cleaved into: MAP1B heavy chain; MAP1 light chain LC1]	MAP1B
P46821	P46821_S1322	-0.457895	NA	P46821	MAP1B_HUMAN	Microtubule-associated protein 1B (MAP-1B) [Cleaved into: MAP1B heavy chain; MAP1 light chain LC1]	MAP1B
P46821	P46821_S1376	1.26496	NA	P46821	MAP1B_HUMAN	Microtubule-associated protein 1B (MAP-1B) [Cleaved into: MAP1B heavy chain; MAP1 light chain LC1]	MAP1B
P46821	P46821_S1389	0.269881	NA	P46821	MAP1B_HUMAN	Microtubule-associated protein 1B (MAP-1B) [Cleaved into: MAP1B heavy chain; MAP1 light chain LC1]	MAP1B
P46821	P46821_S1396	-1.39217	0.00827958	P46821	MAP1B_HUMAN	Microtubule-associated protein 1B (MAP-1B) [Cleaved into: MAP1B heavy chain; MAP1 light chain LC1]	MAP1B
P46821	P46821_S1396,P46821_S1400	0.576221	0.748606	P46821	MAP1B_HUMAN	Microtubule-associated protein 1B (MAP-1B) [Cleaved into: MAP1B heavy chain; MAP1 light chain LC1]	MAP1B
P46821	P46821_S1400	-1.23233	0.584964	P46821	MAP1B_HUMAN	Microtubule-associated protein 1B (MAP-1B) [Cleaved into: MAP1B heavy chain; MAP1 light chain LC1]	MAP1B
P46821	P46821_S1400,P46821_S1408	1.95345	NA	P46821	MAP1B_HUMAN	Microtubule-associated protein 1B (MAP-1B) [Cleaved into: MAP1B heavy chain; MAP1 light chain LC1]	MAP1B
P46821	P46821_S1438	-0.428213	0.849556	P46821	MAP1B_HUMAN	Microtubule-associated protein 1B (MAP-1B) [Cleaved into: MAP1B heavy chain; MAP1 light chain LC1]	MAP1B
P46821	P46821_S1438,P46821_S1443	-3.47668	NA	P46821	MAP1B_HUMAN	Microtubule-associated protein 1B (MAP-1B) [Cleaved into: MAP1B heavy chain; MAP1 light chain LC1]	MAP1B
P46821	P46821_S1443	-1.54327	NA	P46821	MAP1B_HUMAN	Microtubule-associated protein 1B (MAP-1B) [Cleaved into: MAP1B heavy chain; MAP1 light chain LC1]	MAP1B
P46821	P46821_S1501	-1.17597	0.536694	P46821	MAP1B_HUMAN	Microtubule-associated protein 1B (MAP-1B) [Cleaved into: MAP1B heavy chain; MAP1 light chain LC1]	MAP1B
P46821	P46821_S1618	-1.8767	NA	P46821	MAP1B_HUMAN	Microtubule-associated protein 1B (MAP-1B) [Cleaved into: MAP1B heavy chain; MAP1 light chain LC1]	MAP1B
P46821	P46821_S1625	-1.42532	0.569199	P46821	MAP1B_HUMAN	Microtubule-associated protein 1B (MAP-1B) [Cleaved into: MAP1B heavy chain; MAP1 light chain LC1]	MAP1B
P46821	P46821_S1653	-5.50593	NA	P46821	MAP1B_HUMAN	Microtubule-associated protein 1B (MAP-1B) [Cleaved into: MAP1B heavy chain; MAP1 light chain LC1]	MAP1B
P46821	P46821_S1779	-1.08688	0.040772	P46821	MAP1B_HUMAN	Microtubule-associated protein 1B (MAP-1B) [Cleaved into: MAP1B heavy chain; MAP1 light chain LC1]	MAP1B
P46821	P46821_S1782	-1.03427	NA	P46821	MAP1B_HUMAN	Microtubule-associated protein 1B (MAP-1B) [Cleaved into: MAP1B heavy chain; MAP1 light chain LC1]	MAP1B
P46821	P46821_S1782,P46821_S1785	0.187179	NA	P46821	MAP1B_HUMAN	Microtubule-associated protein 1B (MAP-1B) [Cleaved into: MAP1B heavy chain; MAP1 light chain LC1]	MAP1B
P46821	P46821_S1782,P46821_T1788	1.00243	NA	P46821	MAP1B_HUMAN	Microtubule-associated protein 1B (MAP-1B) [Cleaved into: MAP1B heavy chain; MAP1 light chain LC1]	MAP1B
P46821	P46821_S1785	NA	NA	P46821	MAP1B_HUMAN	Microtubule-associated protein 1B (MAP-1B) [Cleaved into: MAP1B heavy chain; MAP1 light chain LC1]	MAP1B
P46821	P46821_S1792	-1.31389	0.449073	P46821	MAP1B_HUMAN	Microtubule-associated protein 1B (MAP-1B) [Cleaved into: MAP1B heavy chain; MAP1 light chain LC1]	MAP1B
P46821	P46821_S1792,P46821_S1793	-1.98256	NA	P46821	MAP1B_HUMAN	Microtubule-associated protein 1B (MAP-1B) [Cleaved into: MAP1B heavy chain; MAP1 light chain LC1]	MAP1B
P46821	P46821_S1792,P46821_S1797	1.55981	0.512371	P46821	MAP1B_HUMAN	Microtubule-associated protein 1B (MAP-1B) [Cleaved into: MAP1B heavy chain; MAP1 light chain LC1]	MAP1B
P46821	P46821_S1797	NA	NA	P46821	MAP1B_HUMAN	Microtubule-associated protein 1B (MAP-1B) [Cleaved into: MAP1B heavy chain; MAP1 light chain LC1]	MAP1B
P46821	P46821_S1818	-0.392868	NA	P46821	MAP1B_HUMAN	Microtubule-associated protein 1B (MAP-1B) [Cleaved into: MAP1B heavy chain; MAP1 light chain LC1]	MAP1B
P46821	P46821_S1852	-1.09053	NA	P46821	MAP1B_HUMAN	Microtubule-associated protein 1B (MAP-1B) [Cleaved into: MAP1B heavy chain; MAP1 light chain LC1]	MAP1B
P46821	P46821_S1915	-0.504233	0.11876	P46821	MAP1B_HUMAN	Microtubule-associated protein 1B (MAP-1B) [Cleaved into: MAP1B heavy chain; MAP1 light chain LC1]	MAP1B
P46821	P46821_S1965	-0.259988	0.615563	P46821	MAP1B_HUMAN	Microtubule-associated protein 1B (MAP-1B) [Cleaved into: MAP1B heavy chain; MAP1 light chain LC1]	MAP1B
P46821	P46821_S2072	NA	NA	P46821	MAP1B_HUMAN	Microtubule-associated protein 1B (MAP-1B) [Cleaved into: MAP1B heavy chain; MAP1 light chain LC1]	MAP1B
P46821	P46821_S2100	-1.23869	0.527524	P46821	MAP1B_HUMAN	Microtubule-associated protein 1B (MAP-1B) [Cleaved into: MAP1B heavy chain; MAP1 light chain LC1]	MAP1B
P46821	P46821_S2271	-1.42411	NA	P46821	MAP1B_HUMAN	Microtubule-associated protein 1B (MAP-1B) [Cleaved into: MAP1B heavy chain; MAP1 light chain LC1]	MAP1B
P46821	P46821_S561	1.48067	0.133693	P46821	MAP1B_HUMAN	Microtubule-associated protein 1B (MAP-1B) [Cleaved into: MAP1B heavy chain; MAP1 light chain LC1]	MAP1B
P46821	P46821_S614	-0.227294	0.754485	P46821	MAP1B_HUMAN	Microtubule-associated protein 1B (MAP-1B) [Cleaved into: MAP1B heavy chain; MAP1 light chain LC1]	MAP1B
P46821	P46821_S831	-0.956424	NA	P46821	MAP1B_HUMAN	Microtubule-associated protein 1B (MAP-1B) [Cleaved into: MAP1B heavy chain; MAP1 light chain LC1]	MAP1B
P46821	P46821_S831,P46821_S832	0.219596	0.945255	P46821	MAP1B_HUMAN	Microtubule-associated protein 1B (MAP-1B) [Cleaved into: MAP1B heavy chain; MAP1 light chain LC1]	MAP1B
P46821	P46821_S832	-0.801163	0.515776	P46821	MAP1B_HUMAN	Microtubule-associated protein 1B (MAP-1B) [Cleaved into: MAP1B heavy chain; MAP1 light chain LC1]	MAP1B
P46821	P46821_T1067	-1.22138	NA	P46821	MAP1B_HUMAN	Microtubule-associated protein 1B (MAP-1B) [Cleaved into: MAP1B heavy chain; MAP1 light chain LC1]	MAP1B
P46821	P46821_T1282	0.164502	0.824341	P46821	MAP1B_HUMAN	Microtubule-associated protein 1B (MAP-1B) [Cleaved into: MAP1B heavy chain; MAP1 light chain LC1]	MAP1B
P46821	P46821_T1633	0.740713	0.746924	P46821	MAP1B_HUMAN	Microtubule-associated protein 1B (MAP-1B) [Cleaved into: MAP1B heavy chain; MAP1 light chain LC1]	MAP1B
P46821	P46821_T1788	-0.840802	0.106578	P46821	MAP1B_HUMAN	Microtubule-associated protein 1B (MAP-1B) [Cleaved into: MAP1B heavy chain; MAP1 light chain LC1]	MAP1B
P46821	P46821_T1895	0.240137	NA	P46821	MAP1B_HUMAN	Microtubule-associated protein 1B (MAP-1B) [Cleaved into: MAP1B heavy chain; MAP1 light chain LC1]	MAP1B
P46821	P46821_T1898	0.377224	0.185671	P46821	MAP1B_HUMAN	Microtubule-associated protein 1B (MAP-1B) [Cleaved into: MAP1B heavy chain; MAP1 light chain LC1]	MAP1B
P46821	P46821_T1912	-0.355486	NA	P46821	MAP1B_HUMAN	Microtubule-associated protein 1B (MAP-1B) [Cleaved into: MAP1B heavy chain; MAP1 light chain LC1]	MAP1B
P46821	P46821_T1932	-0.0713823	NA	P46821	MAP1B_HUMAN	Microtubule-associated protein 1B (MAP-1B) [Cleaved into: MAP1B heavy chain; MAP1 light chain LC1]	MAP1B
P46821	P46821_T1946	0.0622924	NA	P46821	MAP1B_HUMAN	Microtubule-associated protein 1B (MAP-1B) [Cleaved into: MAP1B heavy chain; MAP1 light chain LC1]	MAP1B
P46821	P46821_T1949	-0.47379	0.115781	P46821	MAP1B_HUMAN	Microtubule-associated protein 1B (MAP-1B) [Cleaved into: MAP1B heavy chain; MAP1 light chain LC1]	MAP1B
P46821	P46821_T2031	-1.15713	NA	P46821	MAP1B_HUMAN	Microtubule-associated protein 1B (MAP-1B) [Cleaved into: MAP1B heavy chain; MAP1 light chain LC1]	MAP1B
P46821	P46821_T2034	-0.102628	NA	P46821	MAP1B_HUMAN	Microtubule-associated protein 1B (MAP-1B) [Cleaved into: MAP1B heavy chain; MAP1 light chain LC1]	MAP1B
P46821	P46821_T2067	-0.729557	NA	P46821	MAP1B_HUMAN	Microtubule-associated protein 1B (MAP-1B) [Cleaved into: MAP1B heavy chain; MAP1 light chain LC1]	MAP1B
P46821	P46821_T704	1.93469	0.338014	P46821	MAP1B_HUMAN	Microtubule-associated protein 1B (MAP-1B) [Cleaved into: MAP1B heavy chain; MAP1 light chain LC1]	MAP1B
P46821	P46821_T948	0.279356	0.411296	P46821	MAP1B_HUMAN	Microtubule-associated protein 1B (MAP-1B) [Cleaved into: MAP1B heavy chain; MAP1 light chain LC1]	MAP1B
P46934	P46934_S747	-2.68201	NA	P46934	NEDD4_HUMAN	E3 ubiquitin-protein ligase NEDD4 (EC 6.3.2.-) (Cell proliferation-inducing gene 53 protein) (Neural precursor cell expressed developmentally down-regulated protein 4) (NEDD-4)	NEDD4
P46937	P46937_S109	-0.622814	0.280276	P46937	YAP1_HUMAN	Yorkie homolog (65 kDa Yes-associated protein) (YAP65)	YAP1
P46937	P46937_S127	NA	NA	P46937	YAP1_HUMAN	Yorkie homolog (65 kDa Yes-associated protein) (YAP65)	YAP1
P46937	P46937_S127,P46937_T143	-0.662902	0.732593	P46937	YAP1_HUMAN	Yorkie homolog (65 kDa Yes-associated protein) (YAP65)	YAP1
P46937	P46937_S138	-2.57269	NA	P46937	YAP1_HUMAN	Yorkie homolog (65 kDa Yes-associated protein) (YAP65)	YAP1
P46937	P46937_S138,P46937_T141	-2.81023	NA	P46937	YAP1_HUMAN	Yorkie homolog (65 kDa Yes-associated protein) (YAP65)	YAP1
P46937	P46937_S163	-3.30088	NA	P46937	YAP1_HUMAN	Yorkie homolog (65 kDa Yes-associated protein) (YAP65)	YAP1
P46937	P46937_S61	-1.98613	0.479747	P46937	YAP1_HUMAN	Yorkie homolog (65 kDa Yes-associated protein) (YAP65)	YAP1
P46937	P46937_T110	4.0186	NA	P46937	YAP1_HUMAN	Yorkie homolog (65 kDa Yes-associated protein) (YAP65)	YAP1
P46937	P46937_T378	-0.307105	NA	P46937	YAP1_HUMAN	Yorkie homolog (65 kDa Yes-associated protein) (YAP65)	YAP1
P46939	P46939_S295	-0.266894	NA	P46939	UTRO_HUMAN	Utrophin (Dystrophin-related protein 1) (DRP-1)	UTRN
P47712	P47712_S437	1.39908	NA	P47712	PA24A_HUMAN	Cytosolic phospholipase A2 (cPLA2) (Phospholipase A2 group IVA) [Includes: Phospholipase A2 (EC 3.1.1.4) (Phosphatidylcholine 2-acylhydrolase); Lysophospholipase (EC 3.1.1.5)]	PLA2G4A
P47914	P47914_S158	0.864459	NA	P47914	RL29_HUMAN	60S ribosomal protein L29 (Cell surface heparin-binding protein HIP)	RPL29
P47974	P47974_S125	NA	NA	P47974	TISD_HUMAN	Zinc finger protein 36, C3H1 type-like 2 (ZFP36-like 2) (Butyrate response factor 2) (EGF-response factor 2) (ERF-2) (Protein TIS11D)	ZFP36L2
P47974	P47974_S438	-1.01719	0.737593	P47974	TISD_HUMAN	Zinc finger protein 36, C3H1 type-like 2 (ZFP36-like 2) (Butyrate response factor 2) (EGF-response factor 2) (ERF-2) (Protein TIS11D)	ZFP36L2
P47974	P47974_S57	-0.288998	NA	P47974	TISD_HUMAN	Zinc finger protein 36, C3H1 type-like 2 (ZFP36-like 2) (Butyrate response factor 2) (EGF-response factor 2) (ERF-2) (Protein TIS11D)	ZFP36L2
P47974	P47974_S59	0.697067	NA	P47974	TISD_HUMAN	Zinc finger protein 36, C3H1 type-like 2 (ZFP36-like 2) (Butyrate response factor 2) (EGF-response factor 2) (ERF-2) (Protein TIS11D)	ZFP36L2
P48382	P48382_S10	1.02778	NA	P48382	RFX5_HUMAN	DNA-binding protein RFX5 (Regulatory factor X 5)	RFX5
P48382	P48382_S308	-1.00779	0.236688	P48382	RFX5_HUMAN	DNA-binding protein RFX5 (Regulatory factor X 5)	RFX5
P48382	P48382_S347	-1.03126	0.327113	P48382	RFX5_HUMAN	DNA-binding protein RFX5 (Regulatory factor X 5)	RFX5
P48634	P48634_S1004	-0.654237	0.476427	P48634	PRC2A_HUMAN	Protein PRRC2A (HLA-B-associated transcript 2) (Large proline-rich protein BAT2) (Proline-rich and coiled-coil-containing protein 2A) (Protein G2)	PRRC2A
P48634	P48634_S1089	-0.12775	0.730602	P48634	PRC2A_HUMAN	Protein PRRC2A (HLA-B-associated transcript 2) (Large proline-rich protein BAT2) (Proline-rich and coiled-coil-containing protein 2A) (Protein G2)	PRRC2A
P48634	P48634_S1089,P48634_S1092	-0.0870757	NA	P48634	PRC2A_HUMAN	Protein PRRC2A (HLA-B-associated transcript 2) (Large proline-rich protein BAT2) (Proline-rich and coiled-coil-containing protein 2A) (Protein G2)	PRRC2A
P48634	P48634_S1092	NA	NA	P48634	PRC2A_HUMAN	Protein PRRC2A (HLA-B-associated transcript 2) (Large proline-rich protein BAT2) (Proline-rich and coiled-coil-containing protein 2A) (Protein G2)	PRRC2A
P48634	P48634_S1106	-0.31626	NA	P48634	PRC2A_HUMAN	Protein PRRC2A (HLA-B-associated transcript 2) (Large proline-rich protein BAT2) (Proline-rich and coiled-coil-containing protein 2A) (Protein G2)	PRRC2A
P48634	P48634_S1106,P48634_S1110	-1.33631	NA	P48634	PRC2A_HUMAN	Protein PRRC2A (HLA-B-associated transcript 2) (Large proline-rich protein BAT2) (Proline-rich and coiled-coil-containing protein 2A) (Protein G2)	PRRC2A
P48634	P48634_S1106,P48634_T1108	0.992203	NA	P48634	PRC2A_HUMAN	Protein PRRC2A (HLA-B-associated transcript 2) (Large proline-rich protein BAT2) (Proline-rich and coiled-coil-containing protein 2A) (Protein G2)	PRRC2A
P48634	P48634_S1110	-1.13512	0.145067	P48634	PRC2A_HUMAN	Protein PRRC2A (HLA-B-associated transcript 2) (Large proline-rich protein BAT2) (Proline-rich and coiled-coil-containing protein 2A) (Protein G2)	PRRC2A
P48634	P48634_S1120	NA	NA	P48634	PRC2A_HUMAN	Protein PRRC2A (HLA-B-associated transcript 2) (Large proline-rich protein BAT2) (Proline-rich and coiled-coil-containing protein 2A) (Protein G2)	PRRC2A
P48634	P48634_S1219	-1.6237	0.251794	P48634	PRC2A_HUMAN	Protein PRRC2A (HLA-B-associated transcript 2) (Large proline-rich protein BAT2) (Proline-rich and coiled-coil-containing protein 2A) (Protein G2)	PRRC2A
P48634	P48634_S1306	0.604877	0.288636	P48634	PRC2A_HUMAN	Protein PRRC2A (HLA-B-associated transcript 2) (Large proline-rich protein BAT2) (Proline-rich and coiled-coil-containing protein 2A) (Protein G2)	PRRC2A
P48634	P48634_S1310	-0.812734	NA	P48634	PRC2A_HUMAN	Protein PRRC2A (HLA-B-associated transcript 2) (Large proline-rich protein BAT2) (Proline-rich and coiled-coil-containing protein 2A) (Protein G2)	PRRC2A
P48634	P48634_S342	0.247935	0.664543	P48634	PRC2A_HUMAN	Protein PRRC2A (HLA-B-associated transcript 2) (Large proline-rich protein BAT2) (Proline-rich and coiled-coil-containing protein 2A) (Protein G2)	PRRC2A
P48634	P48634_S380	1.36331	0.2914	P48634	PRC2A_HUMAN	Protein PRRC2A (HLA-B-associated transcript 2) (Large proline-rich protein BAT2) (Proline-rich and coiled-coil-containing protein 2A) (Protein G2)	PRRC2A
P48634	P48634_S456	-2.43962	0.224172	P48634	PRC2A_HUMAN	Protein PRRC2A (HLA-B-associated transcript 2) (Large proline-rich protein BAT2) (Proline-rich and coiled-coil-containing protein 2A) (Protein G2)	PRRC2A
P48634	P48634_S761	0.31863	0.668434	P48634	PRC2A_HUMAN	Protein PRRC2A (HLA-B-associated transcript 2) (Large proline-rich protein BAT2) (Proline-rich and coiled-coil-containing protein 2A) (Protein G2)	PRRC2A
P48634	P48634_S764	-0.113329	NA	P48634	PRC2A_HUMAN	Protein PRRC2A (HLA-B-associated transcript 2) (Large proline-rich protein BAT2) (Proline-rich and coiled-coil-containing protein 2A) (Protein G2)	PRRC2A
P48634	P48634_S808	NA	NA	P48634	PRC2A_HUMAN	Protein PRRC2A (HLA-B-associated transcript 2) (Large proline-rich protein BAT2) (Proline-rich and coiled-coil-containing protein 2A) (Protein G2)	PRRC2A
P48634	P48634_S823	NA	NA	P48634	PRC2A_HUMAN	Protein PRRC2A (HLA-B-associated transcript 2) (Large proline-rich protein BAT2) (Proline-rich and coiled-coil-containing protein 2A) (Protein G2)	PRRC2A
P48634	P48634_S932	-0.0519184	0.95512	P48634	PRC2A_HUMAN	Protein PRRC2A (HLA-B-associated transcript 2) (Large proline-rich protein BAT2) (Proline-rich and coiled-coil-containing protein 2A) (Protein G2)	PRRC2A
P48634	P48634_T1108	-0.696289	0.205128	P48634	PRC2A_HUMAN	Protein PRRC2A (HLA-B-associated transcript 2) (Large proline-rich protein BAT2) (Proline-rich and coiled-coil-containing protein 2A) (Protein G2)	PRRC2A
P48634	P48634_T1133	-1.01969	NA	P48634	PRC2A_HUMAN	Protein PRRC2A (HLA-B-associated transcript 2) (Large proline-rich protein BAT2) (Proline-rich and coiled-coil-containing protein 2A) (Protein G2)	PRRC2A
P48634	P48634_T1347	-1.87608	NA	P48634	PRC2A_HUMAN	Protein PRRC2A (HLA-B-associated transcript 2) (Large proline-rich protein BAT2) (Proline-rich and coiled-coil-containing protein 2A) (Protein G2)	PRRC2A
P48634	P48634_T610	-0.779976	NA	P48634	PRC2A_HUMAN	Protein PRRC2A (HLA-B-associated transcript 2) (Large proline-rich protein BAT2) (Proline-rich and coiled-coil-containing protein 2A) (Protein G2)	PRRC2A
P48634	P48634_T782	0.236171	0.839926	P48634	PRC2A_HUMAN	Protein PRRC2A (HLA-B-associated transcript 2) (Large proline-rich protein BAT2) (Proline-rich and coiled-coil-containing protein 2A) (Protein G2)	PRRC2A
P48634	P48634_T807	-3.47587	NA	P48634	PRC2A_HUMAN	Protein PRRC2A (HLA-B-associated transcript 2) (Large proline-rich protein BAT2) (Proline-rich and coiled-coil-containing protein 2A) (Protein G2)	PRRC2A
P48637	P48637_S415	-1.43169	NA	P48637	GSHB_HUMAN	Glutathione synthetase (GSH synthetase) (GSH-S) (EC 6.3.2.3) (Glutathione synthase)	GSS
P48651	P48651_S442	1.18917	0.445054	P48651	PTSS1_HUMAN	Phosphatidylserine synthase 1 (PSS-1) (PtdSer synthase 1) (EC 2.7.8.29) (Serine-exchange enzyme I)	PTDSS1
P48730	P48730_T352	-1.2444	0.505751	P48730	KC1D_HUMAN	Casein kinase I isoform delta (CKI-delta) (CKId) (EC 2.7.11.1) (Tau-protein kinase CSNK1D) (EC 2.7.11.26)	CSNK1D
P48960	P48960_S831	-0.536312	0.131633	P48960	CD97_HUMAN	CD97 antigen (Leukocyte antigen CD97) (CD antigen CD97) [Cleaved into: CD97 antigen subunit alpha; CD97 antigen subunit beta]	CD97
P49006	P49006_S104	-1.15924	0.126146	P49006	MRP_HUMAN	MARCKS-related protein (MARCKS-like protein 1) (Macrophage myristoylated alanine-rich C kinase substrate) (Mac-MARCKS) (MacMARCKS)	MARCKSL1
P49006	P49006_S151	1.82224	0.203442	P49006	MRP_HUMAN	MARCKS-related protein (MARCKS-like protein 1) (Macrophage myristoylated alanine-rich C kinase substrate) (Mac-MARCKS) (MacMARCKS)	MARCKSL1
P49006	P49006_S162	NA	NA	P49006	MRP_HUMAN	MARCKS-related protein (MARCKS-like protein 1) (Macrophage myristoylated alanine-rich C kinase substrate) (Mac-MARCKS) (MacMARCKS)	MARCKSL1
P49006	P49006_S22	-0.598644	0.582561	P49006	MRP_HUMAN	MARCKS-related protein (MARCKS-like protein 1) (Macrophage myristoylated alanine-rich C kinase substrate) (Mac-MARCKS) (MacMARCKS)	MARCKSL1
P49006	P49006_S36	0.488285	0.77256	P49006	MRP_HUMAN	MARCKS-related protein (MARCKS-like protein 1) (Macrophage myristoylated alanine-rich C kinase substrate) (Mac-MARCKS) (MacMARCKS)	MARCKSL1
P49006	P49006_S41	3.12885	NA	P49006	MRP_HUMAN	MARCKS-related protein (MARCKS-like protein 1) (Macrophage myristoylated alanine-rich C kinase substrate) (Mac-MARCKS) (MacMARCKS)	MARCKSL1
P49006	P49006_S48	NA	NA	P49006	MRP_HUMAN	MARCKS-related protein (MARCKS-like protein 1) (Macrophage myristoylated alanine-rich C kinase substrate) (Mac-MARCKS) (MacMARCKS)	MARCKSL1
P49006	P49006_S93	0.24338	0.708541	P49006	MRP_HUMAN	MARCKS-related protein (MARCKS-like protein 1) (Macrophage myristoylated alanine-rich C kinase substrate) (Mac-MARCKS) (MacMARCKS)	MARCKSL1
P49006	P49006_T14	NA	NA	P49006	MRP_HUMAN	MARCKS-related protein (MARCKS-like protein 1) (Macrophage myristoylated alanine-rich C kinase substrate) (Mac-MARCKS) (MacMARCKS)	MARCKSL1
P49006	P49006_T148	1.54087	0.318774	P49006	MRP_HUMAN	MARCKS-related protein (MARCKS-like protein 1) (Macrophage myristoylated alanine-rich C kinase substrate) (Mac-MARCKS) (MacMARCKS)	MARCKSL1
P49006	P49006_T85	1.70436	0.0774215	P49006	MRP_HUMAN	MARCKS-related protein (MARCKS-like protein 1) (Macrophage myristoylated alanine-rich C kinase substrate) (Mac-MARCKS) (MacMARCKS)	MARCKSL1
P49023	P49023_S106	-0.561521	0.0602428	P49023	PAXI_HUMAN	Paxillin	PXN
P49023	P49023_S533	1.76428	0.0793973	P49023	PAXI_HUMAN	Paxillin	PXN
P49023	P49023_S84	-1.46329	NA	P49023	PAXI_HUMAN	Paxillin	PXN
P49023	P49023_S85	-1.81265	NA	P49023	PAXI_HUMAN	Paxillin	PXN
P49023	P49023_T318	-0.366133	0.503747	P49023	PAXI_HUMAN	Paxillin	PXN
P49069	P49069_S148	NA	NA	P49069	CAMLG_HUMAN	Calcium signal-modulating cyclophilin ligand (CAML)	CAMLG
P49116	P49116_S19	-1.47411	NA	P49116	NR2C2_HUMAN	Nuclear receptor subfamily 2 group C member 2 (Orphan nuclear receptor TAK1) (Orphan nuclear receptor TR4) (Testicular receptor 4)	NR2C2
P49207	P49207_S12	-1.00945	0.293698	P49207	RL34_HUMAN	60S ribosomal protein L34	RPL34
P49321	P49321_S246	1.33676	0.41969	P49321	NASP_HUMAN	Nuclear autoantigenic sperm protein (NASP)	NASP
P49321	P49321_S451	0.581239	0.71408	P49321	NASP_HUMAN	Nuclear autoantigenic sperm protein (NASP)	NASP
P49321	P49321_S726	2.24019	NA	P49321	NASP_HUMAN	Nuclear autoantigenic sperm protein (NASP)	NASP
P49321	P49321_T448	-0.136312	NA	P49321	NASP_HUMAN	Nuclear autoantigenic sperm protein (NASP)	NASP
P49354	P49354_S373	2.24457	NA	P49354	FNTA_HUMAN	Protein farnesyltransferase/geranylgeranyltransferase type-1 subunit alpha (EC 2.5.1.58) (EC 2.5.1.59) (CAAX farnesyltransferase subunit alpha) (FTase-alpha) (Ras proteins prenyltransferase subunit alpha) (Type I protein geranyl-geranyltransferase subunit alpha) (GGTase-I-alpha)	FNTA
P49356	P49356_S6	-0.1719	0.434851	P49356	FNTB_HUMAN	Protein farnesyltransferase subunit beta (FTase-beta) (EC 2.5.1.58) (CAAX farnesyltransferase subunit beta) (Ras proteins prenyltransferase subunit beta)	FNTB
P49407	P49407_S412	-1.1346	NA	P49407	ARRB1_HUMAN	Beta-arrestin-1 (Arrestin beta-1)	ARRB1
P49450	P49450_S17,P49450_S19	NA	NA	P49450	CENPA_HUMAN	Histone H3-like centromeric protein A (Centromere autoantigen A) (Centromere protein A) (CENP-A)	CENPA
P49450	P49450_S17,P49450_T21	NA	NA	P49450	CENPA_HUMAN	Histone H3-like centromeric protein A (Centromere autoantigen A) (Centromere protein A) (CENP-A)	CENPA
P49454	P49454_S3119	-1.99483	0.127229	P49454	CENPF_HUMAN	Centromere protein F (CENP-F) (AH antigen) (Kinetochore protein CENPF) (Mitosin)	CENPF
P49454	P49454_S3150	-0.762355	0.0626768	P49454	CENPF_HUMAN	Centromere protein F (CENP-F) (AH antigen) (Kinetochore protein CENPF) (Mitosin)	CENPF
P49454	P49454_S3175	0.762335	NA	P49454	CENPF_HUMAN	Centromere protein F (CENP-F) (AH antigen) (Kinetochore protein CENPF) (Mitosin)	CENPF
P49585	P49585_S319	-0.809464	NA	P49585	PCY1A_HUMAN	Choline-phosphate cytidylyltransferase A (EC 2.7.7.15) (CCT-alpha) (CTP:phosphocholine cytidylyltransferase A) (CCT A) (CT A) (Phosphorylcholine transferase A)	PCYT1A
P49585	P49585_S319,P49585_S323	2.88362	NA	P49585	PCY1A_HUMAN	Choline-phosphate cytidylyltransferase A (EC 2.7.7.15) (CCT-alpha) (CTP:phosphocholine cytidylyltransferase A) (CCT A) (CT A) (Phosphorylcholine transferase A)	PCYT1A
P49585	P49585_S329	-0.147783	0.680575	P49585	PCY1A_HUMAN	Choline-phosphate cytidylyltransferase A (EC 2.7.7.15) (CCT-alpha) (CTP:phosphocholine cytidylyltransferase A) (CCT A) (CT A) (Phosphorylcholine transferase A)	PCYT1A
P49585	P49585_S329,P49585_S331	-0.878674	0.392035	P49585	PCY1A_HUMAN	Choline-phosphate cytidylyltransferase A (EC 2.7.7.15) (CCT-alpha) (CTP:phosphocholine cytidylyltransferase A) (CCT A) (CT A) (Phosphorylcholine transferase A)	PCYT1A
P49585	P49585_S329,P49585_S331,P49585_S339	4.67986	NA	P49585	PCY1A_HUMAN	Choline-phosphate cytidylyltransferase A (EC 2.7.7.15) (CCT-alpha) (CTP:phosphocholine cytidylyltransferase A) (CCT A) (CT A) (Phosphorylcholine transferase A)	PCYT1A
P49585	P49585_S331	-0.672971	0.445632	P49585	PCY1A_HUMAN	Choline-phosphate cytidylyltransferase A (EC 2.7.7.15) (CCT-alpha) (CTP:phosphocholine cytidylyltransferase A) (CCT A) (CT A) (Phosphorylcholine transferase A)	PCYT1A
P49585	P49585_S339	NA	NA	P49585	PCY1A_HUMAN	Choline-phosphate cytidylyltransferase A (EC 2.7.7.15) (CCT-alpha) (CTP:phosphocholine cytidylyltransferase A) (CCT A) (CT A) (Phosphorylcholine transferase A)	PCYT1A
P49585	P49585_S339,P49585_S347	NA	NA	P49585	PCY1A_HUMAN	Choline-phosphate cytidylyltransferase A (EC 2.7.7.15) (CCT-alpha) (CTP:phosphocholine cytidylyltransferase A) (CCT A) (CT A) (Phosphorylcholine transferase A)	PCYT1A
P49585	P49585_S343	8.37932	NA	P49585	PCY1A_HUMAN	Choline-phosphate cytidylyltransferase A (EC 2.7.7.15) (CCT-alpha) (CTP:phosphocholine cytidylyltransferase A) (CCT A) (CT A) (Phosphorylcholine transferase A)	PCYT1A
P49585	P49585_S362	0.0676337	0.951482	P49585	PCY1A_HUMAN	Choline-phosphate cytidylyltransferase A (EC 2.7.7.15) (CCT-alpha) (CTP:phosphocholine cytidylyltransferase A) (CCT A) (CT A) (Phosphorylcholine transferase A)	PCYT1A
P49585	P49585_T342	-0.446183	0.470358	P49585	PCY1A_HUMAN	Choline-phosphate cytidylyltransferase A (EC 2.7.7.15) (CCT-alpha) (CTP:phosphocholine cytidylyltransferase A) (CCT A) (CT A) (Phosphorylcholine transferase A)	PCYT1A
P49585	P49585_T342,P49585_S343	0.536524	NA	P49585	PCY1A_HUMAN	Choline-phosphate cytidylyltransferase A (EC 2.7.7.15) (CCT-alpha) (CTP:phosphocholine cytidylyltransferase A) (CCT A) (CT A) (Phosphorylcholine transferase A)	PCYT1A
P49585	P49585_T342,P49585_S347	1.01684	NA	P49585	PCY1A_HUMAN	Choline-phosphate cytidylyltransferase A (EC 2.7.7.15) (CCT-alpha) (CTP:phosphocholine cytidylyltransferase A) (CCT A) (CT A) (Phosphorylcholine transferase A)	PCYT1A
P49589	P49589_S19	NA	NA	P49589	SYCC_HUMAN	Cysteine--tRNA ligase, cytoplasmic (EC 6.1.1.16) (Cysteinyl-tRNA synthetase) (CysRS)	CARS
P49674	P49674_S363	NA	NA	P49674	KC1E_HUMAN	Casein kinase I isoform epsilon (CKI-epsilon) (CKIe) (EC 2.7.11.1)	CSNK1E
P49674	P49674_T362	0.295304	NA	P49674	KC1E_HUMAN	Casein kinase I isoform epsilon (CKI-epsilon) (CKIe) (EC 2.7.11.1)	CSNK1E
P49716	P49716_S191	1.5066	0.292676	P49716	CEBPD_HUMAN	CCAAT/enhancer-binding protein delta (C/EBP delta) (Nuclear factor NF-IL6-beta) (NF-IL6-beta)	CEBPD
P49736	P49736_S108	1.67676	NA	P49736	MCM2_HUMAN	DNA replication licensing factor MCM2 (EC 3.6.4.12) (Minichromosome maintenance protein 2 homolog) (Nuclear protein BM28)	MCM2
P49736	P49736_S12	-3.7983	NA	P49736	MCM2_HUMAN	DNA replication licensing factor MCM2 (EC 3.6.4.12) (Minichromosome maintenance protein 2 homolog) (Nuclear protein BM28)	MCM2
P49736	P49736_S13	0.0622002	0.9834	P49736	MCM2_HUMAN	DNA replication licensing factor MCM2 (EC 3.6.4.12) (Minichromosome maintenance protein 2 homolog) (Nuclear protein BM28)	MCM2
P49736	P49736_S139	-0.536007	0.361302	P49736	MCM2_HUMAN	DNA replication licensing factor MCM2 (EC 3.6.4.12) (Minichromosome maintenance protein 2 homolog) (Nuclear protein BM28)	MCM2
P49736	P49736_S26	0.684381	0.370219	P49736	MCM2_HUMAN	DNA replication licensing factor MCM2 (EC 3.6.4.12) (Minichromosome maintenance protein 2 homolog) (Nuclear protein BM28)	MCM2
P49736	P49736_S27	0.176879	0.519314	P49736	MCM2_HUMAN	DNA replication licensing factor MCM2 (EC 3.6.4.12) (Minichromosome maintenance protein 2 homolog) (Nuclear protein BM28)	MCM2
P49736	P49736_S381	-0.380538	0.190593	P49736	MCM2_HUMAN	DNA replication licensing factor MCM2 (EC 3.6.4.12) (Minichromosome maintenance protein 2 homolog) (Nuclear protein BM28)	MCM2
P49736	P49736_S40	0.618976	0.413445	P49736	MCM2_HUMAN	DNA replication licensing factor MCM2 (EC 3.6.4.12) (Minichromosome maintenance protein 2 homolog) (Nuclear protein BM28)	MCM2
P49736	P49736_S40,P49736_S41	0.280058	0.486952	P49736	MCM2_HUMAN	DNA replication licensing factor MCM2 (EC 3.6.4.12) (Minichromosome maintenance protein 2 homolog) (Nuclear protein BM28)	MCM2
P49736	P49736_S41	0.134156	0.865587	P49736	MCM2_HUMAN	DNA replication licensing factor MCM2 (EC 3.6.4.12) (Minichromosome maintenance protein 2 homolog) (Nuclear protein BM28)	MCM2
P49736	P49736_S5,P49736_S13	NA	NA	P49736	MCM2_HUMAN	DNA replication licensing factor MCM2 (EC 3.6.4.12) (Minichromosome maintenance protein 2 homolog) (Nuclear protein BM28)	MCM2
P49736	P49736_T25	NA	NA	P49736	MCM2_HUMAN	DNA replication licensing factor MCM2 (EC 3.6.4.12) (Minichromosome maintenance protein 2 homolog) (Nuclear protein BM28)	MCM2
P49736	P49736_T9	-1.31776	NA	P49736	MCM2_HUMAN	DNA replication licensing factor MCM2 (EC 3.6.4.12) (Minichromosome maintenance protein 2 homolog) (Nuclear protein BM28)	MCM2
P49750	P49750_S924	NA	NA	P49750	YLPM1_HUMAN	YLP motif-containing protein 1 (Nuclear protein ZAP3) (ZAP113)	YLPM1
P49756	P49756_S583	1.25484	NA	P49756	RBM25_HUMAN	RNA-binding protein 25 (Arg/Glu/Asp-rich protein of 120 kDa) (RED120) (Protein S164) (RNA-binding motif protein 25) (RNA-binding region-containing protein 7)	RBM25
P49756	P49756_S677	0.0521912	0.951514	P49756	RBM25_HUMAN	RNA-binding protein 25 (Arg/Glu/Asp-rich protein of 120 kDa) (RED120) (Protein S164) (RNA-binding motif protein 25) (RNA-binding region-containing protein 7)	RBM25
P49756	P49756_S703	-1.0248	0.216875	P49756	RBM25_HUMAN	RNA-binding protein 25 (Arg/Glu/Asp-rich protein of 120 kDa) (RED120) (Protein S164) (RNA-binding motif protein 25) (RNA-binding region-containing protein 7)	RBM25
P49757	P49757_S194	0.291035	0.481401	P49757	NUMB_HUMAN	Protein numb homolog (h-Numb) (Protein S171)	NUMB
P49757	P49757_S634	-1.12039	NA	P49757	NUMB_HUMAN	Protein numb homolog (h-Numb) (Protein S171)	NUMB
P49761	P49761_S157	-1.7862	0.136987	P49761	CLK3_HUMAN	Dual specificity protein kinase CLK3 (EC 2.7.12.1) (CDC-like kinase 3)	CLK3
P49761	P49761_S197,P49761_S199	1.74342	NA	P49761	CLK3_HUMAN	Dual specificity protein kinase CLK3 (EC 2.7.12.1) (CDC-like kinase 3)	CLK3
P49761	P49761_S199	-0.649	0.498976	P49761	CLK3_HUMAN	Dual specificity protein kinase CLK3 (EC 2.7.12.1) (CDC-like kinase 3)	CLK3
P49761	P49761_S224	0.554191	NA	P49761	CLK3_HUMAN	Dual specificity protein kinase CLK3 (EC 2.7.12.1) (CDC-like kinase 3)	CLK3
P49761	P49761_S224,P49761_S226	0.850925	0.551813	P49761	CLK3_HUMAN	Dual specificity protein kinase CLK3 (EC 2.7.12.1) (CDC-like kinase 3)	CLK3
P49761	P49761_S283	-0.0190605	NA	P49761	CLK3_HUMAN	Dual specificity protein kinase CLK3 (EC 2.7.12.1) (CDC-like kinase 3)	CLK3
P49761	P49761_S637	2.0639	0.337005	P49761	CLK3_HUMAN	Dual specificity protein kinase CLK3 (EC 2.7.12.1) (CDC-like kinase 3)	CLK3
P49768	P49768_S353	NA	NA	P49768	PSN1_HUMAN	Presenilin-1 (PS-1) (EC 3.4.23.-) (Protein S182) [Cleaved into: Presenilin-1 NTF subunit; Presenilin-1 CTF subunit; Presenilin-1 CTF12 (PS1-CTF12)]	PSEN1
P49768	P49768_S43	-1.09758	0.0604549	P49768	PSN1_HUMAN	Presenilin-1 (PS-1) (EC 3.4.23.-) (Protein S182) [Cleaved into: Presenilin-1 NTF subunit; Presenilin-1 CTF subunit; Presenilin-1 CTF12 (PS1-CTF12)]	PSEN1
P49768	P49768_T327	-1.83191	NA	P49768	PSN1_HUMAN	Presenilin-1 (PS-1) (EC 3.4.23.-) (Protein S182) [Cleaved into: Presenilin-1 NTF subunit; Presenilin-1 CTF subunit; Presenilin-1 CTF12 (PS1-CTF12)]	PSEN1
P49768	P49768_T354	-1.5107	NA	P49768	PSN1_HUMAN	Presenilin-1 (PS-1) (EC 3.4.23.-) (Protein S182) [Cleaved into: Presenilin-1 NTF subunit; Presenilin-1 CTF subunit; Presenilin-1 CTF12 (PS1-CTF12)]	PSEN1
P49790	P49790_S192	0.522688	0.645015	P49790	NU153_HUMAN	Nuclear pore complex protein Nup153 (153 kDa nucleoporin) (Nucleoporin Nup153)	NUP153
P49790	P49790_S203	-2.19564	NA	P49790	NU153_HUMAN	Nuclear pore complex protein Nup153 (153 kDa nucleoporin) (Nucleoporin Nup153)	NUP153
P49790	P49790_S209	0.0711421	NA	P49790	NU153_HUMAN	Nuclear pore complex protein Nup153 (153 kDa nucleoporin) (Nucleoporin Nup153)	NUP153
P49790	P49790_S333	NA	NA	P49790	NU153_HUMAN	Nuclear pore complex protein Nup153 (153 kDa nucleoporin) (Nucleoporin Nup153)	NUP153
P49790	P49790_S334	NA	NA	P49790	NU153_HUMAN	Nuclear pore complex protein Nup153 (153 kDa nucleoporin) (Nucleoporin Nup153)	NUP153
P49790	P49790_S334,P49790_S338	NA	NA	P49790	NU153_HUMAN	Nuclear pore complex protein Nup153 (153 kDa nucleoporin) (Nucleoporin Nup153)	NUP153
P49790	P49790_S338	-1.01366	0.446017	P49790	NU153_HUMAN	Nuclear pore complex protein Nup153 (153 kDa nucleoporin) (Nucleoporin Nup153)	NUP153
P49790	P49790_S614	-1.18783	0.396597	P49790	NU153_HUMAN	Nuclear pore complex protein Nup153 (153 kDa nucleoporin) (Nucleoporin Nup153)	NUP153
P49790	P49790_S619	-0.641889	NA	P49790	NU153_HUMAN	Nuclear pore complex protein Nup153 (153 kDa nucleoporin) (Nucleoporin Nup153)	NUP153
P49790	P49790_S687	-1.03793	0.369167	P49790	NU153_HUMAN	Nuclear pore complex protein Nup153 (153 kDa nucleoporin) (Nucleoporin Nup153)	NUP153
P49790	P49790_T102	-0.945559	0.13231	P49790	NU153_HUMAN	Nuclear pore complex protein Nup153 (153 kDa nucleoporin) (Nucleoporin Nup153)	NUP153
P49790	P49790_T588	-0.815533	0.598016	P49790	NU153_HUMAN	Nuclear pore complex protein Nup153 (153 kDa nucleoporin) (Nucleoporin Nup153)	NUP153
P49790	P49790_T632	-0.407054	0.00948391	P49790	NU153_HUMAN	Nuclear pore complex protein Nup153 (153 kDa nucleoporin) (Nucleoporin Nup153)	NUP153
P49792	P49792_S1160	-2.0107	NA	P49792	RBP2_HUMAN	E3 SUMO-protein ligase RanBP2 (EC 6.3.2.-) (358 kDa nucleoporin) (Nuclear pore complex protein Nup358) (Nucleoporin Nup358) (Ran-binding protein 2) (RanBP2) (p270) [Includes: Putative peptidyl-prolyl cis-trans isomerase (PPIase) (EC 5.2.1.8) (Rotamase)]	RANBP2
P49792	P49792_S1400	1.60321	NA	P49792	RBP2_HUMAN	E3 SUMO-protein ligase RanBP2 (EC 6.3.2.-) (358 kDa nucleoporin) (Nuclear pore complex protein Nup358) (Nucleoporin Nup358) (Ran-binding protein 2) (RanBP2) (p270) [Includes: Putative peptidyl-prolyl cis-trans isomerase (PPIase) (EC 5.2.1.8) (Rotamase)]	RANBP2
P49792	P49792_S1443	-1.11721	NA	P49792	RBP2_HUMAN	E3 SUMO-protein ligase RanBP2 (EC 6.3.2.-) (358 kDa nucleoporin) (Nuclear pore complex protein Nup358) (Nucleoporin Nup358) (Ran-binding protein 2) (RanBP2) (p270) [Includes: Putative peptidyl-prolyl cis-trans isomerase (PPIase) (EC 5.2.1.8) (Rotamase)]	RANBP2
P49792	P49792_S1509	-1.80249	0.191972	P49792	RBP2_HUMAN	E3 SUMO-protein ligase RanBP2 (EC 6.3.2.-) (358 kDa nucleoporin) (Nuclear pore complex protein Nup358) (Nucleoporin Nup358) (Ran-binding protein 2) (RanBP2) (p270) [Includes: Putative peptidyl-prolyl cis-trans isomerase (PPIase) (EC 5.2.1.8) (Rotamase)]	RANBP2
P49792	P49792_S1613	-0.351288	0.68813	P49792	RBP2_HUMAN	E3 SUMO-protein ligase RanBP2 (EC 6.3.2.-) (358 kDa nucleoporin) (Nuclear pore complex protein Nup358) (Nucleoporin Nup358) (Ran-binding protein 2) (RanBP2) (p270) [Includes: Putative peptidyl-prolyl cis-trans isomerase (PPIase) (EC 5.2.1.8) (Rotamase)]	RANBP2
P49792	P49792_T1412	-0.674335	NA	P49792	RBP2_HUMAN	E3 SUMO-protein ligase RanBP2 (EC 6.3.2.-) (358 kDa nucleoporin) (Nuclear pore complex protein Nup358) (Nucleoporin Nup358) (Ran-binding protein 2) (RanBP2) (p270) [Includes: Putative peptidyl-prolyl cis-trans isomerase (PPIase) (EC 5.2.1.8) (Rotamase)]	RANBP2
P49792	P49792_S955	NA	NA	P49792	RBP2_HUMAN	E3 SUMO-protein ligase RanBP2 (EC 6.3.2.-) (358 kDa nucleoporin) (Nuclear pore complex protein Nup358) (Nucleoporin Nup358) (Ran-binding protein 2) (RanBP2) (p270) [Includes: Putative peptidyl-prolyl cis-trans isomerase (PPIase) (EC 5.2.1.8) (Rotamase)]	RANBP2
P49792	P49792_T1156	-1.16117	NA	P49792	RBP2_HUMAN	E3 SUMO-protein ligase RanBP2 (EC 6.3.2.-) (358 kDa nucleoporin) (Nuclear pore complex protein Nup358) (Nucleoporin Nup358) (Ran-binding protein 2) (RanBP2) (p270) [Includes: Putative peptidyl-prolyl cis-trans isomerase (PPIase) (EC 5.2.1.8) (Rotamase)]	RANBP2
P49792	P49792_T1399	-0.878068	NA	P49792	RBP2_HUMAN	E3 SUMO-protein ligase RanBP2 (EC 6.3.2.-) (358 kDa nucleoporin) (Nuclear pore complex protein Nup358) (Nucleoporin Nup358) (Ran-binding protein 2) (RanBP2) (p270) [Includes: Putative peptidyl-prolyl cis-trans isomerase (PPIase) (EC 5.2.1.8) (Rotamase)]	RANBP2
P49792	P49792_S2741	NA	NA	P49792	RBP2_HUMAN	E3 SUMO-protein ligase RanBP2 (EC 6.3.2.-) (358 kDa nucleoporin) (Nuclear pore complex protein Nup358) (Nucleoporin Nup358) (Ran-binding protein 2) (RanBP2) (p270) [Includes: Putative peptidyl-prolyl cis-trans isomerase (PPIase) (EC 5.2.1.8) (Rotamase)]	RANBP2
P49792	P49792_S2900	-2.80079	NA	P49792	RBP2_HUMAN	E3 SUMO-protein ligase RanBP2 (EC 6.3.2.-) (358 kDa nucleoporin) (Nuclear pore complex protein Nup358) (Nucleoporin Nup358) (Ran-binding protein 2) (RanBP2) (p270) [Includes: Putative peptidyl-prolyl cis-trans isomerase (PPIase) (EC 5.2.1.8) (Rotamase)]	RANBP2
P49792	P49792_T2503	-1.68784	NA	P49792	RBP2_HUMAN	E3 SUMO-protein ligase RanBP2 (EC 6.3.2.-) (358 kDa nucleoporin) (Nuclear pore complex protein Nup358) (Nucleoporin Nup358) (Ran-binding protein 2) (RanBP2) (p270) [Includes: Putative peptidyl-prolyl cis-trans isomerase (PPIase) (EC 5.2.1.8) (Rotamase)]	RANBP2
P49792	P49792_S2668	-0.282144	0.0359213	P49792	RBP2_HUMAN	E3 SUMO-protein ligase RanBP2 (EC 6.3.2.-) (358 kDa nucleoporin) (Nuclear pore complex protein Nup358) (Nucleoporin Nup358) (Ran-binding protein 2) (RanBP2) (p270) [Includes: Putative peptidyl-prolyl cis-trans isomerase (PPIase) (EC 5.2.1.8) (Rotamase)]	RANBP2
P49792	P49792_T2613	-0.525014	0.598449	P49792	RBP2_HUMAN	E3 SUMO-protein ligase RanBP2 (EC 6.3.2.-) (358 kDa nucleoporin) (Nuclear pore complex protein Nup358) (Nucleoporin Nup358) (Ran-binding protein 2) (RanBP2) (p270) [Includes: Putative peptidyl-prolyl cis-trans isomerase (PPIase) (EC 5.2.1.8) (Rotamase)]	RANBP2
P49792	P49792_S781	-1.445	0.36826	P49792	RBP2_HUMAN	E3 SUMO-protein ligase RanBP2 (EC 6.3.2.-) (358 kDa nucleoporin) (Nuclear pore complex protein Nup358) (Nucleoporin Nup358) (Ran-binding protein 2) (RanBP2) (p270) [Includes: Putative peptidyl-prolyl cis-trans isomerase (PPIase) (EC 5.2.1.8) (Rotamase)]	RANBP2
P49792	P49792_S781,P49792_S788	0.0401625	NA	P49792	RBP2_HUMAN	E3 SUMO-protein ligase RanBP2 (EC 6.3.2.-) (358 kDa nucleoporin) (Nuclear pore complex protein Nup358) (Nucleoporin Nup358) (Ran-binding protein 2) (RanBP2) (p270) [Includes: Putative peptidyl-prolyl cis-trans isomerase (PPIase) (EC 5.2.1.8) (Rotamase)]	RANBP2
P49792;Q7Z3J3	P49792_S2276,Q7Z3J3_S1301	NA	NA	P49792;Q7Z3J3	RBP2_HUMAN;RGPD4_HUMAN	E3 SUMO-protein ligase RanBP2 (EC 6.3.2.-) (358 kDa nucleoporin) (Nuclear pore complex protein Nup358) (Nucleoporin Nup358) (Ran-binding protein 2) (RanBP2) (p270) [Includes: Putative peptidyl-prolyl cis-trans isomerase (PPIase) (EC 5.2.1.8) (Rotamase)];RanBP2-like and GRIP domain-containing protein 4	RANBP2;RGPD4
P49792;Q7Z3J3	P49792_S2278,Q7Z3J3_S1303	-2.22412	0.23834	P49792;Q7Z3J3	RBP2_HUMAN;RGPD4_HUMAN	E3 SUMO-protein ligase RanBP2 (EC 6.3.2.-) (358 kDa nucleoporin) (Nuclear pore complex protein Nup358) (Nucleoporin Nup358) (Ran-binding protein 2) (RanBP2) (p270) [Includes: Putative peptidyl-prolyl cis-trans isomerase (PPIase) (EC 5.2.1.8) (Rotamase)];RanBP2-like and GRIP domain-containing protein 4	RANBP2;RGPD4
P49792;Q7Z3J3;A6NKT7	P49792_T799,Q7Z3J3_T800,A6NKT7_T800	-1.76727	0.221184	A6NKT7;P49792;Q7Z3J3	RGPD3_HUMAN;RBP2_HUMAN;RGPD4_HUMAN	RanBP2-like and GRIP domain-containing protein 3;E3 SUMO-protein ligase RanBP2 (EC 6.3.2.-) (358 kDa nucleoporin) (Nuclear pore complex protein Nup358) (Nucleoporin Nup358) (Ran-binding protein 2) (RanBP2) (p270) [Includes: Putative peptidyl-prolyl cis-trans isomerase (PPIase) (EC 5.2.1.8) (Rotamase)];RanBP2-like and GRIP domain-containing protein 4	RGPD3;RANBP2;RGPD4
P49792;Q7Z3J3;A6NKT7;P0DJD0;P0DJD1	P49792_S796,Q7Z3J3_S797,A6NKT7_S797,P0DJD0_S787,P0DJD1_S795	0.618668	NA	A6NKT7;P0DJD0;P0DJD1;P49792;Q7Z3J3	RGPD3_HUMAN;RGPD1_HUMAN;RGPD2_HUMAN;RBP2_HUMAN;RGPD4_HUMAN	RanBP2-like and GRIP domain-containing protein 3;RANBP2-like and GRIP domain-containing protein 1 (Ran-binding protein 2-like 6) (RanBP2-like 6) (RanBP2L6);RANBP2-like and GRIP domain-containing protein 2 (Ran-binding protein 2-like 2) (RanBP2-like 2) (RanBP2L2);E3 SUMO-protein ligase RanBP2 (EC 6.3.2.-) (358 kDa nucleoporin) (Nuclear pore complex protein Nup358) (Nucleoporin Nup358) (Ran-binding…	RGPD3;RGPD1;RGPD2;RANBP2;RGPD4
P49792;Q7Z3J3;A6NKT7;P0DJD0;P0DJD1	P49792_S2287,Q7Z3J3_S1312,A6NKT7_S1312,P0DJD0_S1296,P0DJD1_S1304	-1.3897	0.231328	A6NKT7;P0DJD0;P0DJD1;P49792;Q7Z3J3	RGPD3_HUMAN;RGPD1_HUMAN;RGPD2_HUMAN;RBP2_HUMAN;RGPD4_HUMAN	RanBP2-like and GRIP domain-containing protein 3;RANBP2-like and GRIP domain-containing protein 1 (Ran-binding protein 2-like 6) (RanBP2-like 6) (RanBP2L6);RANBP2-like and GRIP domain-containing protein 2 (Ran-binding protein 2-like 2) (RanBP2-like 2) (RanBP2L2);E3 SUMO-protein ligase RanBP2 (EC 6.3.2.-) (358 kDa nucleoporin) (Nuclear pore complex protein Nup358) (Nucleoporin Nup358) (Ran-binding…	RGPD3;RGPD1;RGPD2;RANBP2;RGPD4
P49792;Q7Z3J3;A6NKT7;P0DJD0;P0DJD1	P49792_S2510,Q7Z3J3_S1535,A6NKT7_S1535,P0DJD0_S1519,P0DJD1_S1527	-1.23568	0.399336	A6NKT7;P0DJD0;P0DJD1;P49792;Q7Z3J3	RGPD3_HUMAN;RGPD1_HUMAN;RGPD2_HUMAN;RBP2_HUMAN;RGPD4_HUMAN	RanBP2-like and GRIP domain-containing protein 3;RANBP2-like and GRIP domain-containing protein 1 (Ran-binding protein 2-like 6) (RanBP2-like 6) (RanBP2L6);RANBP2-like and GRIP domain-containing protein 2 (Ran-binding protein 2-like 2) (RanBP2-like 2) (RanBP2L2);E3 SUMO-protein ligase RanBP2 (EC 6.3.2.-) (358 kDa nucleoporin) (Nuclear pore complex protein Nup358) (Nucleoporin Nup358) (Ran-binding…	RGPD3;RGPD1;RGPD2;RANBP2;RGPD4
P49792;Q7Z3J3;A6NKT7;P0DJD0;P0DJD1;Q99666;O14715	P49792_S2454,Q7Z3J3_S1479,A6NKT7_S1479,P0DJD0_S1463,P0DJD1_S1471,Q99666_S1478,O14715_S1478	-0.848947	NA	A6NKT7;O14715;P0DJD0;P0DJD1;P49792;Q7Z3J3;Q99666	RGPD3_HUMAN;RGPD8_HUMAN;RGPD1_HUMAN;RGPD2_HUMAN;RBP2_HUMAN;RGPD4_HUMAN;RGPD5_HUMAN	RanBP2-like and GRIP domain-containing protein 3;RANBP2-like and GRIP domain-containing protein 8 (Ran-binding protein 2-like 3) (RanBP2-like 3) (RanBP2L3);RANBP2-like and GRIP domain-containing protein 1 (Ran-binding protein 2-like 6) (RanBP2-like 6) (RanBP2L6);RANBP2-like and GRIP domain-containing protein 2 (Ran-binding protein 2-like 2) (RanBP2-like 2) (RanBP2L2);E3 SUMO-protein ligase RanBP2…	RGPD3;RGPD8;RGPD1;RGPD2;RANBP2;RGPD4;RGPD5
P49792;Q7Z3J3;A6NKT7;P0DJD0;P0DJD1;Q99666;O14715	P49792_T2450,Q7Z3J3_T1475,A6NKT7_T1475,P0DJD0_T1459,P0DJD1_T1467,Q99666_T1474,O14715_T1474	-1.0792	NA	A6NKT7;O14715;P0DJD0;P0DJD1;P49792;Q7Z3J3;Q99666	RGPD3_HUMAN;RGPD8_HUMAN;RGPD1_HUMAN;RGPD2_HUMAN;RBP2_HUMAN;RGPD4_HUMAN;RGPD5_HUMAN	RanBP2-like and GRIP domain-containing protein 3;RANBP2-like and GRIP domain-containing protein 8 (Ran-binding protein 2-like 3) (RanBP2-like 3) (RanBP2L3);RANBP2-like and GRIP domain-containing protein 1 (Ran-binding protein 2-like 6) (RanBP2-like 6) (RanBP2L6);RANBP2-like and GRIP domain-containing protein 2 (Ran-binding protein 2-like 2) (RanBP2-like 2) (RanBP2L2);E3 SUMO-protein ligase RanBP2…	RGPD3;RGPD8;RGPD1;RGPD2;RANBP2;RGPD4;RGPD5
P49792;Q7Z3J3;A6NKT7;P0DJD0;P0DJD1;Q99666;O14715	P49792_S788,Q7Z3J3_S789,A6NKT7_S789,P0DJD0_S779,P0DJD1_S787,Q99666_S788,O14715_S788	-0.0730931	0.710287	A6NKT7;O14715;P0DJD0;P0DJD1;P49792;Q7Z3J3;Q99666	RGPD3_HUMAN;RGPD8_HUMAN;RGPD1_HUMAN;RGPD2_HUMAN;RBP2_HUMAN;RGPD4_HUMAN;RGPD5_HUMAN	RanBP2-like and GRIP domain-containing protein 3;RANBP2-like and GRIP domain-containing protein 8 (Ran-binding protein 2-like 3) (RanBP2-like 3) (RanBP2L3);RANBP2-like and GRIP domain-containing protein 1 (Ran-binding protein 2-like 6) (RanBP2-like 6) (RanBP2L6);RANBP2-like and GRIP domain-containing protein 2 (Ran-binding protein 2-like 2) (RanBP2-like 2) (RanBP2L2);E3 SUMO-protein ligase RanBP2…	RGPD3;RGPD8;RGPD1;RGPD2;RANBP2;RGPD4;RGPD5
P49792;Q7Z3J3;A6NKT7;Q99666;O14715	P49792_S2250,Q7Z3J3_S1275,A6NKT7_S1275,Q99666_S1274,O14715_S1274	-1.4757	0.118602	A6NKT7;O14715;P49792;Q7Z3J3;Q99666	RGPD3_HUMAN;RGPD8_HUMAN;RBP2_HUMAN;RGPD4_HUMAN;RGPD5_HUMAN	RanBP2-like and GRIP domain-containing protein 3;RANBP2-like and GRIP domain-containing protein 8 (Ran-binding protein 2-like 3) (RanBP2-like 3) (RanBP2L3);E3 SUMO-protein ligase RanBP2 (EC 6.3.2.-) (358 kDa nucleoporin) (Nuclear pore complex protein Nup358) (Nucleoporin Nup358) (Ran-binding protein 2) (RanBP2) (p270) [Includes: Putative peptidyl-prolyl cis-trans isomerase (PPIase) (EC 5.2.1.8) (…	RGPD3;RGPD8;RANBP2;RGPD4;RGPD5
P49792;Q7Z3J3;A6NKT7;Q99666;O14715	P49792_S2251,Q7Z3J3_S1276,A6NKT7_S1276,Q99666_S1275,O14715_S1275	-0.134849	NA	A6NKT7;O14715;P49792;Q7Z3J3;Q99666	RGPD3_HUMAN;RGPD8_HUMAN;RBP2_HUMAN;RGPD4_HUMAN;RGPD5_HUMAN	RanBP2-like and GRIP domain-containing protein 3;RANBP2-like and GRIP domain-containing protein 8 (Ran-binding protein 2-like 3) (RanBP2-like 3) (RanBP2L3);E3 SUMO-protein ligase RanBP2 (EC 6.3.2.-) (358 kDa nucleoporin) (Nuclear pore complex protein Nup358) (Nucleoporin Nup358) (Ran-binding protein 2) (RanBP2) (p270) [Includes: Putative peptidyl-prolyl cis-trans isomerase (PPIase) (EC 5.2.1.8) (…	RGPD3;RGPD8;RANBP2;RGPD4;RGPD5
[truncated: 6,573 more rows]

## Sheet: 639VPRKAR1A-phospho
Protein	mod_sites	DMSO.DOX_log2FC	DMSO.DOX_pvalue	uniprot_ac	Protein_name	Protein_desc	Gene.names
A0AVK6	A0AVK6_S71	0.502712	0.149384	A0AVK6	E2F8_HUMAN	Transcription factor E2F8 (E2F-8)	E2F8
A0AVK6	A0AVK6_S351	-0.550097	NA	A0AVK6	E2F8_HUMAN	Transcription factor E2F8 (E2F-8)	E2F8
A0AVK6	A0AVK6_S357	-0.830007	NA	A0AVK6	E2F8_HUMAN	Transcription factor E2F8 (E2F-8)	E2F8
A0AVK6	A0AVK6_S413,A0AVK6_S416	-0.209355	NA	A0AVK6	E2F8_HUMAN	Transcription factor E2F8 (E2F-8)	E2F8
A0AVK6	A0AVK6_T354	-0.0877658	NA	A0AVK6	E2F8_HUMAN	Transcription factor E2F8 (E2F-8)	E2F8
A0AVT1	A0AVT1_S36	-0.185746	0.912178	A0AVT1	UBA6_HUMAN	Ubiquitin-like modifier-activating enzyme 6 (Ubiquitin-activating enzyme 6) (Monocyte protein 4) (MOP-4) (Ubiquitin-activating enzyme E1-like protein 2) (E1-L2)	UBA6
A0FGR8	A0FGR8_S739	-0.168569	0.00781745	A0FGR8	ESYT2_HUMAN	Extended synaptotagmin-2 (E-Syt2) (Chr2Syt)	ESYT2
A0FGR8	A0FGR8_T753,A0FGR8_S758	2.10525	0.0209159	A0FGR8	ESYT2_HUMAN	Extended synaptotagmin-2 (E-Syt2) (Chr2Syt)	ESYT2
A0FGR8	A0FGR8_S693	0.678905	0.0301562	A0FGR8	ESYT2_HUMAN	Extended synaptotagmin-2 (E-Syt2) (Chr2Syt)	ESYT2
A0FGR8	A0FGR8_S691	-0.267005	0.415219	A0FGR8	ESYT2_HUMAN	Extended synaptotagmin-2 (E-Syt2) (Chr2Syt)	ESYT2
A0FGR8	A0FGR8_S691,A0FGR8_S693	0.156852	0.672872	A0FGR8	ESYT2_HUMAN	Extended synaptotagmin-2 (E-Syt2) (Chr2Syt)	ESYT2
A0FGR8	A0FGR8_S743	-0.0398542	0.819711	A0FGR8	ESYT2_HUMAN	Extended synaptotagmin-2 (E-Syt2) (Chr2Syt)	ESYT2
A0FGR8	A0FGR8_S738	-0.0235077	0.936505	A0FGR8	ESYT2_HUMAN	Extended synaptotagmin-2 (E-Syt2) (Chr2Syt)	ESYT2
A0FGR8	A0FGR8_T753	0.0550072	0.959999	A0FGR8	ESYT2_HUMAN	Extended synaptotagmin-2 (E-Syt2) (Chr2Syt)	ESYT2
A0FGR8	A0FGR8_S755	0.223045	NA	A0FGR8	ESYT2_HUMAN	Extended synaptotagmin-2 (E-Syt2) (Chr2Syt)	ESYT2
A0FGR8	A0FGR8_S755,A0FGR8_S761	1.88032	NA	A0FGR8	ESYT2_HUMAN	Extended synaptotagmin-2 (E-Syt2) (Chr2Syt)	ESYT2
A0FGR8	A0FGR8_S758	-0.0830764	NA	A0FGR8	ESYT2_HUMAN	Extended synaptotagmin-2 (E-Syt2) (Chr2Syt)	ESYT2
A0FGR8	A0FGR8_S761	NA	NA	A0FGR8	ESYT2_HUMAN	Extended synaptotagmin-2 (E-Syt2) (Chr2Syt)	ESYT2
A0FGR8	A0FGR8_T753,A0FGR8_S761	1.06831	NA	A0FGR8	ESYT2_HUMAN	Extended synaptotagmin-2 (E-Syt2) (Chr2Syt)	ESYT2
A0JLT2	A0JLT2_S226	-0.780803	0.29411	A0JLT2	MED19_HUMAN	Mediator of RNA polymerase II transcription subunit 19 (Lung cancer metastasis-related protein 1) (Mediator complex subunit 19)	MED19
A0JNW5	A0JNW5_S935	-1.39458	0.121487	A0JNW5	UH1BL_HUMAN	UHRF1-binding protein 1-like	UHRF1BP1L
A0JNW5	A0JNW5_S414,A0JNW5_T420	0.625232	0.391333	A0JNW5	UH1BL_HUMAN	UHRF1-binding protein 1-like	UHRF1BP1L
A0JNW5	A0JNW5_S774	-0.038452	0.62001	A0JNW5	UH1BL_HUMAN	UHRF1-binding protein 1-like	UHRF1BP1L
A0JNW5	A0JNW5_S418	-0.0477663	NA	A0JNW5	UH1BL_HUMAN	UHRF1-binding protein 1-like	UHRF1BP1L
A0JNW5	A0JNW5_T1401	-0.363862	NA	A0JNW5	UH1BL_HUMAN	UHRF1-binding protein 1-like	UHRF1BP1L
A0MZ66	A0MZ66_S506	0.319541	0.24668	A0MZ66	SHOT1_HUMAN	Shootin-1	KIAA1598
A0MZ66	A0MZ66_S494	-0.0685762	0.889548	A0MZ66	SHOT1_HUMAN	Shootin-1	KIAA1598
A1A4S6	A1A4S6_S591	-0.357971	0.129071	A1A4S6	RHG10_HUMAN	Rho GTPase-activating protein 10 (GTPase regulator associated with focal adhesion kinase 2) (Graf-related protein 2) (Rho-type GTPase-activating protein 10)	ARHGAP10
A1L0T0	A1L0T0_S167	0.504749	0.239251	A1L0T0	ILVBL_HUMAN	Acetolactate synthase-like protein (EC 2.2.1.-) (IlvB-like protein)	ILVBL
A1L170	A1L170_S223	1.29988	0.140882	A1L170	CA226_HUMAN	Uncharacterized protein C1orf226	C1orf226
A1L390	A1L390_S76	1.07107	0.0521138	A1L390	PKHG3_HUMAN	Pleckstrin homology domain-containing family G member 3 (PH domain-containing family G member 3)	PLEKHG3
A1L390	A1L390_S1081	0.356749	0.155921	A1L390	PKHG3_HUMAN	Pleckstrin homology domain-containing family G member 3 (PH domain-containing family G member 3)	PLEKHG3
A1L390	A1L390_S759	0.790882	0.21965	A1L390	PKHG3_HUMAN	Pleckstrin homology domain-containing family G member 3 (PH domain-containing family G member 3)	PLEKHG3
A1L390	A1L390_S1040	-0.859905	0.299611	A1L390	PKHG3_HUMAN	Pleckstrin homology domain-containing family G member 3 (PH domain-containing family G member 3)	PLEKHG3
A1L390	A1L390_S741	-0.516782	0.309605	A1L390	PKHG3_HUMAN	Pleckstrin homology domain-containing family G member 3 (PH domain-containing family G member 3)	PLEKHG3
A1L390	A1L390_S1028	-1.61653	0.449935	A1L390	PKHG3_HUMAN	Pleckstrin homology domain-containing family G member 3 (PH domain-containing family G member 3)	PLEKHG3
A1L390	A1L390_S643	0.288283	0.600098	A1L390	PKHG3_HUMAN	Pleckstrin homology domain-containing family G member 3 (PH domain-containing family G member 3)	PLEKHG3
A1L390	A1L390_S1037,A1L390_S1040	0.513587	0.600508	A1L390	PKHG3_HUMAN	Pleckstrin homology domain-containing family G member 3 (PH domain-containing family G member 3)	PLEKHG3
A1L390	A1L390_S1168	-0.565605	0.727577	A1L390	PKHG3_HUMAN	Pleckstrin homology domain-containing family G member 3 (PH domain-containing family G member 3)	PLEKHG3
A1L390	A1L390_S1037	0.234519	0.745055	A1L390	PKHG3_HUMAN	Pleckstrin homology domain-containing family G member 3 (PH domain-containing family G member 3)	PLEKHG3
A1L390	A1L390_S1079	#NAME?	NA	A1L390	PKHG3_HUMAN	Pleckstrin homology domain-containing family G member 3 (PH domain-containing family G member 3)	PLEKHG3
A1L390	A1L390_S1154	#NAME?	NA	A1L390	PKHG3_HUMAN	Pleckstrin homology domain-containing family G member 3 (PH domain-containing family G member 3)	PLEKHG3
A1L390	A1L390_S1162,A1L390_S1168	0.806324	NA	A1L390	PKHG3_HUMAN	Pleckstrin homology domain-containing family G member 3 (PH domain-containing family G member 3)	PLEKHG3
A1L390	A1L390_S433	-0.225578	NA	A1L390	PKHG3_HUMAN	Pleckstrin homology domain-containing family G member 3 (PH domain-containing family G member 3)	PLEKHG3
A1L390	A1L390_T1026	Inf	NA	A1L390	PKHG3_HUMAN	Pleckstrin homology domain-containing family G member 3 (PH domain-containing family G member 3)	PLEKHG3
A1L390	A1L390_T964	-0.0587932	NA	A1L390	PKHG3_HUMAN	Pleckstrin homology domain-containing family G member 3 (PH domain-containing family G member 3)	PLEKHG3
A1L4H1	A1L4H1_T43	-0.593911	NA	A1L4H1	SRCRL_HUMAN	Soluble scavenger receptor cysteine-rich domain-containing protein SSC5D (Soluble scavenger protein with 5 SRCR domains) (SSc5D)	SSC5D
A1X283	A1X283_S528	-0.74005	0.229605	A1X283	SPD2B_HUMAN	SH3 and PX domain-containing protein 2B (Adapter protein HOFI) (Factor for adipocyte differentiation 49) (Tyrosine kinase substrate with four SH3 domains)	SH3PXD2B
A1X283	A1X283_S291	0.113474	0.458499	A1X283	SPD2B_HUMAN	SH3 and PX domain-containing protein 2B (Adapter protein HOFI) (Factor for adipocyte differentiation 49) (Tyrosine kinase substrate with four SH3 domains)	SH3PXD2B
A1X283	A1X283_S770	-0.101681	0.785741	A1X283	SPD2B_HUMAN	SH3 and PX domain-containing protein 2B (Adapter protein HOFI) (Factor for adipocyte differentiation 49) (Tyrosine kinase substrate with four SH3 domains)	SH3PXD2B
A1X283	A1X283_S675	-0.599723	NA	A1X283	SPD2B_HUMAN	SH3 and PX domain-containing protein 2B (Adapter protein HOFI) (Factor for adipocyte differentiation 49) (Tyrosine kinase substrate with four SH3 domains)	SH3PXD2B
A1X283	A1X283_S679	NA	NA	A1X283	SPD2B_HUMAN	SH3 and PX domain-containing protein 2B (Adapter protein HOFI) (Factor for adipocyte differentiation 49) (Tyrosine kinase substrate with four SH3 domains)	SH3PXD2B
A2A3K4	A2A3K4_S392	-0.284004	0.548234	A2A3K4	PTPC1_HUMAN	Protein tyrosine phosphatase domain-containing protein 1 (EC 3.1.3.-)	PTPDC1
A2AJT9	A2AJT9_S15,A2AJT9_S17	0.947492	0.0133953	A2AJT9	CX023_HUMAN	Uncharacterized protein CXorf23	CXorf23
A2AJT9	A2AJT9_S402	0.429929	0.106996	A2AJT9	CX023_HUMAN	Uncharacterized protein CXorf23	CXorf23
A2AJT9	A2AJT9_S17	0.500964	0.109704	A2AJT9	CX023_HUMAN	Uncharacterized protein CXorf23	CXorf23
A2AJT9	A2AJT9_S100	-4.09702	NA	A2AJT9	CX023_HUMAN	Uncharacterized protein CXorf23	CXorf23
A2AJT9	A2AJT9_S78,A2AJT9_S80	0.122436	NA	A2AJT9	CX023_HUMAN	Uncharacterized protein CXorf23	CXorf23
A2AJT9	A2AJT9_Y71,A2AJT9_S78	Inf	NA	A2AJT9	CX023_HUMAN	Uncharacterized protein CXorf23	CXorf23
A2AJT9	A2AJT9_Y74,A2AJT9_S80	1.0082	NA	A2AJT9	CX023_HUMAN	Uncharacterized protein CXorf23	CXorf23
A2RU67	A2RU67_S62	0.75189	0.402967	A2RU67	K1467_HUMAN	Uncharacterized protein KIAA1467	KIAA1467
A2VCL2	A2VCL2_S767	-0.321308	0.557486	A2VCL2	CC162_HUMAN	Coiled-coil domain-containing protein 162 (Coiled-coil domain-containing protein 162 pseudogene)	CCDC162P
A2VDJ0	A2VDJ0_S1093	0.301652	0.0965358	A2VDJ0	T131L_HUMAN	Transmembrane protein 131-like	KIAA0922
A3KN83	A3KN83_S815	-1.10504	0.00429012	A3KN83	SBNO1_HUMAN	Protein strawberry notch homolog 1 (Monocyte protein 3) (MOP-3)	SBNO1
A3KN83	A3KN83_S794	-2.99388	0.0201591	A3KN83	SBNO1_HUMAN	Protein strawberry notch homolog 1 (Monocyte protein 3) (MOP-3)	SBNO1
A3KN83	A3KN83_S214	0.705775	0.201897	A3KN83	SBNO1_HUMAN	Protein strawberry notch homolog 1 (Monocyte protein 3) (MOP-3)	SBNO1
A5PL33	A5PL33_S253	0.10062	0.787057	A5PL33	KRBA1_HUMAN	Protein KRBA1	KRBA1
A5PL33	A5PL33_S182	#NAME?	NA	A5PL33	KRBA1_HUMAN	Protein KRBA1	KRBA1
A5YKK6	A5YKK6_T1058	-0.356342	0.562861	A5YKK6	CNOT1_HUMAN	CCR4-NOT transcription complex subunit 1 (CCR4-associated factor 1) (Negative regulator of transcription subunit 1 homolog) (NOT1H) (hNOT1)	CNOT1
A5YKK6	A5YKK6_S1061	0.325027	0.653232	A5YKK6	CNOT1_HUMAN	CCR4-NOT transcription complex subunit 1 (CCR4-associated factor 1) (Negative regulator of transcription subunit 1 homolog) (NOT1H) (hNOT1)	CNOT1
A5YM69	A5YM69_S184	0.261539	0.0174899	A5YM69	ARG35_HUMAN	Rho guanine nucleotide exchange factor 35 (Rho guanine nucleotide exchange factor 5-like protein)	ARHGEF35
A5YM69	A5YM69_S445	NA	NA	A5YM69	ARG35_HUMAN	Rho guanine nucleotide exchange factor 35 (Rho guanine nucleotide exchange factor 5-like protein)	ARHGEF35
A6ND36	A6ND36_S650	-0.505628	0.108958	A6ND36	FA83G_HUMAN	Protein FAM83G	FAM83G
A6ND36	A6ND36_S634	0.173626	0.56707	A6ND36	FA83G_HUMAN	Protein FAM83G	FAM83G
A6ND36	A6ND36_S127	Inf	NA	A6ND36	FA83G_HUMAN	Protein FAM83G	FAM83G
A6ND36	A6ND36_S356	-0.438919	NA	A6ND36	FA83G_HUMAN	Protein FAM83G	FAM83G
A6NDB9	A6NDB9_T301	NA	NA	A6NDB9	PALM3_HUMAN	Paralemmin-3	PALM3
A6NE52	A6NE52_S756	0.314246	NA	A6NE52	K1875_HUMAN	WD repeat-containing protein KIAA1875	KIAA1875
A6NFI3	A6NFI3_S10	0.299059	0.0507683	A6NFI3	ZN316_HUMAN	Zinc finger protein 316	ZNF316
A6NHR9	A6NHR9_S1974	3.0886	0.439339	A6NHR9	SMHD1_HUMAN	Structural maintenance of chromosomes flexible hinge domain-containing protein 1 (SMC hinge domain-containing protein 1)	SMCHD1
A6NHT5	A6NHT5_T149	-0.978619	NA	A6NHT5	HMX3_HUMAN	Homeobox protein HMX3 (Homeobox protein H6 family member 3) (Homeobox protein Nkx-5.1)	HMX3
A6NJL1;Q9BUG6	A6NJL1_S295,Q9BUG6_S296	0.0918032	NA	A6NJL1;Q9BUG6	ZSA5B_HUMAN;ZSA5A_HUMAN	Zinc finger and SCAN domain-containing protein 5B;Zinc finger and SCAN domain-containing protein 5A (Zinc finger protein 495)	ZSCAN5B;ZSCAN5A
A6NKD9	A6NKD9_S246	0.12076	0.299297	A6NKD9	CC85C_HUMAN	Coiled-coil domain-containing protein 85C	CCDC85C
A6NKD9	A6NKD9_S258	0.31582	0.533527	A6NKD9	CC85C_HUMAN	Coiled-coil domain-containing protein 85C	CCDC85C
A6NKD9	A6NKD9_S178	-0.201704	0.538066	A6NKD9	CC85C_HUMAN	Coiled-coil domain-containing protein 85C	CCDC85C
A6NKF1	A6NKF1_S402	0.384865	0.110732	A6NKF1	SAC31_HUMAN	SAC3 domain-containing protein 1 (SAC3 homology domain-containing protein 1)	SAC3D1
A6NKT7;P0DJD0;P0DJD1;Q99666;O14715	A6NKT7_S1305,P0DJD0_S1289,P0DJD1_S1297,Q99666_S1304,O14715_S1304	0.600545	0.158978	A6NKT7;O14715;P0DJD0;P0DJD1;Q99666	RGPD3_HUMAN;RGPD8_HUMAN;RGPD1_HUMAN;RGPD2_HUMAN;RGPD5_HUMAN	RanBP2-like and GRIP domain-containing protein 3;RANBP2-like and GRIP domain-containing protein 8 (Ran-binding protein 2-like 3) (RanBP2-like 3) (RanBP2L3);RANBP2-like and GRIP domain-containing protein 1 (Ran-binding protein 2-like 6) (RanBP2-like 6) (RanBP2L6);RANBP2-like and GRIP domain-containing protein 2 (Ran-binding protein 2-like 2) (RanBP2-like 2) (RanBP2L2);RANBP2-like and GRIP domain-c…	RGPD3;RGPD8;RGPD1;RGPD2;RGPD5
A6NM28	A6NM28_T399	-0.119419	NA	A6NM28	ZFP92_HUMAN	Zinc finger protein 92 homolog (Zfp-92)	ZFP92
A7E2V4	A7E2V4_S1156	0.7281	0.168245	A7E2V4	ZSWM8_HUMAN	Zinc finger SWIM domain-containing protein 8	ZSWIM8
A7E2V4	A7E2V4_S1092	0.227482	0.430671	A7E2V4	ZSWM8_HUMAN	Zinc finger SWIM domain-containing protein 8	ZSWIM8
A7E2V4	A7E2V4_S1130	-0.0487367	0.844891	A7E2V4	ZSWM8_HUMAN	Zinc finger SWIM domain-containing protein 8	ZSWIM8
A7E2V4	A7E2V4_S1088	-0.852349	NA	A7E2V4	ZSWM8_HUMAN	Zinc finger SWIM domain-containing protein 8	ZSWIM8
A7E2V4	A7E2V4_S1267	Inf	NA	A7E2V4	ZSWM8_HUMAN	Zinc finger SWIM domain-containing protein 8	ZSWIM8
A7E2V4	A7E2V4_S48	#NAME?	NA	A7E2V4	ZSWM8_HUMAN	Zinc finger SWIM domain-containing protein 8	ZSWIM8
A7KAX9	A7KAX9_S706	0.25663	0.264128	A7KAX9	RHG32_HUMAN	Rho GTPase-activating protein 32 (Brain-specific Rho GTPase-activating protein) (GAB-associated Cdc42/Rac GTPase-activating protein) (GC-GAP) (GTPase regulator interacting with TrkA) (Rho-type GTPase-activating protein 32) (Rho/Cdc42/Rac GTPase-activating protein RICS) (RhoGAP involved in the beta-catenin-N-cadherin and NMDA receptor signaling) (p200RhoGAP) (p250GAP)	ARHGAP32
A7KAX9	A7KAX9_S892	0.790195	0.335779	A7KAX9	RHG32_HUMAN	Rho GTPase-activating protein 32 (Brain-specific Rho GTPase-activating protein) (GAB-associated Cdc42/Rac GTPase-activating protein) (GC-GAP) (GTPase regulator interacting with TrkA) (Rho-type GTPase-activating protein 32) (Rho/Cdc42/Rac GTPase-activating protein RICS) (RhoGAP involved in the beta-catenin-N-cadherin and NMDA receptor signaling) (p200RhoGAP) (p250GAP)	ARHGAP32
A7KAX9	A7KAX9_S1203	2.19921	0.38594	A7KAX9	RHG32_HUMAN	Rho GTPase-activating protein 32 (Brain-specific Rho GTPase-activating protein) (GAB-associated Cdc42/Rac GTPase-activating protein) (GC-GAP) (GTPase regulator interacting with TrkA) (Rho-type GTPase-activating protein 32) (Rho/Cdc42/Rac GTPase-activating protein RICS) (RhoGAP involved in the beta-catenin-N-cadherin and NMDA receptor signaling) (p200RhoGAP) (p250GAP)	ARHGAP32
A7KAX9	A7KAX9_S856	0.627981	0.73209	A7KAX9	RHG32_HUMAN	Rho GTPase-activating protein 32 (Brain-specific Rho GTPase-activating protein) (GAB-associated Cdc42/Rac GTPase-activating protein) (GC-GAP) (GTPase regulator interacting with TrkA) (Rho-type GTPase-activating protein 32) (Rho/Cdc42/Rac GTPase-activating protein RICS) (RhoGAP involved in the beta-catenin-N-cadherin and NMDA receptor signaling) (p200RhoGAP) (p250GAP)	ARHGAP32
A7KAX9	A7KAX9_S952	-0.065531	NA	A7KAX9	RHG32_HUMAN	Rho GTPase-activating protein 32 (Brain-specific Rho GTPase-activating protein) (GAB-associated Cdc42/Rac GTPase-activating protein) (GC-GAP) (GTPase regulator interacting with TrkA) (Rho-type GTPase-activating protein 32) (Rho/Cdc42/Rac GTPase-activating protein RICS) (RhoGAP involved in the beta-catenin-N-cadherin and NMDA receptor signaling) (p200RhoGAP) (p250GAP)	ARHGAP32
A7KAX9	A7KAX9_T949	NA	NA	A7KAX9	RHG32_HUMAN	Rho GTPase-activating protein 32 (Brain-specific Rho GTPase-activating protein) (GAB-associated Cdc42/Rac GTPase-activating protein) (GC-GAP) (GTPase regulator interacting with TrkA) (Rho-type GTPase-activating protein 32) (Rho/Cdc42/Rac GTPase-activating protein RICS) (RhoGAP involved in the beta-catenin-N-cadherin and NMDA receptor signaling) (p200RhoGAP) (p250GAP)	ARHGAP32
A7XYQ1	A7XYQ1_S594	-0.290679	0.0173156	A7XYQ1	SOBP_HUMAN	Sine oculis-binding protein homolog (Jackson circler protein 1)	SOBP
A7XYQ1	A7XYQ1_S313	0.247933	0.391078	A7XYQ1	SOBP_HUMAN	Sine oculis-binding protein homolog (Jackson circler protein 1)	SOBP
A8CG34	A8CG34_S370	-0.768758	0.00821239	A8CG34	P121C_HUMAN	Nuclear envelope pore membrane protein POM 121C (Nuclear pore membrane protein 121-2) (POM121-2) (Pore membrane protein of 121 kDa C)	POM121C
A8CG34	A8CG34_S322,A8CG34_S323	0.0022893	0.994475	A8CG34	P121C_HUMAN	Nuclear envelope pore membrane protein POM 121C (Nuclear pore membrane protein 121-2) (POM121-2) (Pore membrane protein of 121 kDa C)	POM121C
A8CG34	A8CG34_S370,A8CG34_S373	0.306447	NA	A8CG34	P121C_HUMAN	Nuclear envelope pore membrane protein POM 121C (Nuclear pore membrane protein 121-2) (POM121-2) (Pore membrane protein of 121 kDa C)	POM121C
A8CG34;A6NF01;Q96HA1	A8CG34_S412,A6NF01_S19,Q96HA1_S435	0.0172582	0.843228	A6NF01;A8CG34;Q96HA1	P121B_HUMAN;P121C_HUMAN;P121A_HUMAN	Putative nuclear envelope pore membrane protein POM 121B;Nuclear envelope pore membrane protein POM 121C (Nuclear pore membrane protein 121-2) (POM121-2) (Pore membrane protein of 121 kDa C);Nuclear envelope pore membrane protein POM 121 (Nuclear envelope pore membrane protein POM 121A) (Nucleoporin Nup121) (Pore membrane protein of 121 kDa)	POM121B;POM121C;POM121
A8CG34;Q96HA1	A8CG34_S674,Q96HA1_S697	0.378403	0.236313	A8CG34;Q96HA1	P121C_HUMAN;P121A_HUMAN	Nuclear envelope pore membrane protein POM 121C (Nuclear pore membrane protein 121-2) (POM121-2) (Pore membrane protein of 121 kDa C);Nuclear envelope pore membrane protein POM 121 (Nuclear envelope pore membrane protein POM 121A) (Nucleoporin Nup121) (Pore membrane protein of 121 kDa)	POM121C;POM121
A8CG34;Q96HA1	A8CG34_S358,Q96HA1_S381	0.533219	0.51323	A8CG34;Q96HA1	P121C_HUMAN;P121A_HUMAN	Nuclear envelope pore membrane protein POM 121C (Nuclear pore membrane protein 121-2) (POM121-2) (Pore membrane protein of 121 kDa C);Nuclear envelope pore membrane protein POM 121 (Nuclear envelope pore membrane protein POM 121A) (Nucleoporin Nup121) (Pore membrane protein of 121 kDa)	POM121C;POM121
A8CG34;Q96HA1	A8CG34_S19,Q96HA1_S19	-0.0451182	NA	A8CG34;Q96HA1	P121C_HUMAN;P121A_HUMAN	Nuclear envelope pore membrane protein POM 121C (Nuclear pore membrane protein 121-2) (POM121-2) (Pore membrane protein of 121 kDa C);Nuclear envelope pore membrane protein POM 121 (Nuclear envelope pore membrane protein POM 121A) (Nucleoporin Nup121) (Pore membrane protein of 121 kDa)	POM121C;POM121
A8CG34;Q96HA1	A8CG34_S246,Q96HA1_S269	0.16454	NA	A8CG34;Q96HA1	P121C_HUMAN;P121A_HUMAN	Nuclear envelope pore membrane protein POM 121C (Nuclear pore membrane protein 121-2) (POM121-2) (Pore membrane protein of 121 kDa C);Nuclear envelope pore membrane protein POM 121 (Nuclear envelope pore membrane protein POM 121A) (Nucleoporin Nup121) (Pore membrane protein of 121 kDa)	POM121C;POM121
A8MT19;Q8IUC4	A8MT19_S551,Q8IUC4_S654	0.241943	0.582173	A8MT19;Q8IUC4	RHN2P_HUMAN;RHPN2_HUMAN	Putative rhophilin-2-like protein RHPN2P1 (Rhophilin-2 pseudogene 1);Rhophilin-2 (76 kDa RhoB effector protein) (GTP-Rho-binding protein 2) (p76RBE)	RHPN2P1;RHPN2
A8MT19;Q8IUC4	A8MT19_S549,Q8IUC4_S652	#NAME?	NA	A8MT19;Q8IUC4	RHN2P_HUMAN;RHPN2_HUMAN	Putative rhophilin-2-like protein RHPN2P1 (Rhophilin-2 pseudogene 1);Rhophilin-2 (76 kDa RhoB effector protein) (GTP-Rho-binding protein 2) (p76RBE)	RHPN2P1;RHPN2
A8MVW0	A8MVW0_S789	-0.242448	0.754772	A8MVW0	F1712_HUMAN	Protein FAM171A2	FAM171A2
A8MVW0	A8MVW0_S446	0.253794	NA	A8MVW0	F1712_HUMAN	Protein FAM171A2	FAM171A2
B2RTY4	B2RTY4_S1733	0.39349	0.490689	B2RTY4	MYO9A_HUMAN	Unconventional myosin-IXa (Unconventional myosin-9a)	MYO9A
B2RTY4	B2RTY4_S1219	0.189971	0.769651	B2RTY4	MYO9A_HUMAN	Unconventional myosin-IXa (Unconventional myosin-9a)	MYO9A
B2RTY4	B2RTY4_S1215	0.224956	0.83255	B2RTY4	MYO9A_HUMAN	Unconventional myosin-IXa (Unconventional myosin-9a)	MYO9A
C4AMC7;Q6VEQ5;A8K0Z3;A8MWX3	C4AMC7_S343,Q6VEQ5_S345,A8K0Z3_S345,A8MWX3_S358	0.753245	NA	A8K0Z3;A8MWX3;C4AMC7;Q6VEQ5	WASH1_HUMAN;WASH4_HUMAN;WASH3_HUMAN;WASH2_HUMAN	WAS protein family homolog 1 (CXYorf1-like protein on chromosome 9) (Protein FAM39E);Putative WAS protein family homolog 4 (Protein FAM39CP);Putative WAS protein family homolog 3 (Protein FAM39DP);WAS protein family homolog 2 (CXYorf1-like protein on chromosome 2) (Protein FAM39B)	WASH1;WASH4P;WASH3P;WASH2P
C9J069	C9J069_S109	-0.266251	0.591854	C9J069	CI172_HUMAN	Uncharacterized protein C9orf172	C9orf172
C9JLW8	C9JLW8_S21	0.835137	0.123073	C9JLW8	F195B_HUMAN	Protein FAM195B	FAM195B
C9JLW8	C9JLW8_S18	-1.2275	NA	C9JLW8	F195B_HUMAN	Protein FAM195B	FAM195B
C9JLW8	C9JLW8_S18,C9JLW8_S21	NA	NA	C9JLW8	F195B_HUMAN	Protein FAM195B	FAM195B
M0R1G4	M0R1G4_S36	1.80672	0.0982767	NA	NA	NA	NA
M0R1G4	M0R1G4_S49	0.0906724	NA	NA	NA	NA	NA
O00116	O00116_S65	-0.852954	0.0356548	O00116	ADAS_HUMAN	Alkyldihydroxyacetonephosphate synthase, peroxisomal (Alkyl-DHAP synthase) (EC 2.5.1.26) (Aging-associated gene 5 protein) (Alkylglycerone-phosphate synthase)	AGPS
O00139	O00139_S100	-0.240131	0.634327	O00139	KIF2A_HUMAN	Kinesin-like protein KIF2A (Kinesin-2) (hK2)	KIF2A
O00139	O00139_S140	0.00138802	0.997078	O00139	KIF2A_HUMAN	Kinesin-like protein KIF2A (Kinesin-2) (hK2)	KIF2A
O00139	O00139_S586	NA	NA	O00139	KIF2A_HUMAN	Kinesin-like protein KIF2A (Kinesin-2) (hK2)	KIF2A
O00139	O00139_T78	-0.999746	NA	O00139	KIF2A_HUMAN	Kinesin-like protein KIF2A (Kinesin-2) (hK2)	KIF2A
O00148	O00148_S183	NA	NA	O00148	DX39A_HUMAN	ATP-dependent RNA helicase DDX39A (EC 3.6.4.13) (DEAD box protein 39) (Nuclear RNA helicase URH49)	DDX39A
O00159	O00159_S29	1.09752	0.231661	O00159	MYO1C_HUMAN	Unconventional myosin-Ic (Myosin I beta) (MMI-beta) (MMIb)	MYO1C
O00159	O00159_S408	0.119212	0.78701	O00159	MYO1C_HUMAN	Unconventional myosin-Ic (Myosin I beta) (MMI-beta) (MMIb)	MYO1C
O00159	O00159_S864	0.0262519	0.86522	O00159	MYO1C_HUMAN	Unconventional myosin-Ic (Myosin I beta) (MMI-beta) (MMIb)	MYO1C
O00159	O00159_S343	0.18291	NA	O00159	MYO1C_HUMAN	Unconventional myosin-Ic (Myosin I beta) (MMI-beta) (MMIb)	MYO1C
O00161	O00161_S5	0.497167	0.00939949	O00161	SNP23_HUMAN	Synaptosomal-associated protein 23 (SNAP-23) (Vesicle-membrane fusion protein SNAP-23)	SNAP23
O00161	O00161_S110	0.242286	0.255867	O00161	SNP23_HUMAN	Synaptosomal-associated protein 23 (SNAP-23) (Vesicle-membrane fusion protein SNAP-23)	SNAP23
O00161	O00161_S20	0.650914	NA	O00161	SNP23_HUMAN	Synaptosomal-associated protein 23 (SNAP-23) (Vesicle-membrane fusion protein SNAP-23)	SNAP23
O00178	O00178_S24	-1.1033	0.090806	O00178	GTPB1_HUMAN	GTP-binding protein 1 (G-protein 1) (GP-1) (GP1)	GTPBP1
O00178	O00178_S12,O00178_S25	1.20266	0.351315	O00178	GTPB1_HUMAN	GTP-binding protein 1 (G-protein 1) (GP-1) (GP1)	GTPBP1
O00178	O00178_S580	0.207307	0.615832	O00178	GTPB1_HUMAN	GTP-binding protein 1 (G-protein 1) (GP-1) (GP1)	GTPBP1
O00178	O00178_S25	-0.275949	0.804139	O00178	GTPB1_HUMAN	GTP-binding protein 1 (G-protein 1) (GP-1) (GP1)	GTPBP1
O00178	O00178_S12,O00178_S24	0.31326	NA	O00178	GTPB1_HUMAN	GTP-binding protein 1 (G-protein 1) (GP-1) (GP1)	GTPBP1
O00178	O00178_S44	-0.38584	NA	O00178	GTPB1_HUMAN	GTP-binding protein 1 (G-protein 1) (GP-1) (GP1)	GTPBP1
O00178	O00178_S47	Inf	NA	O00178	GTPB1_HUMAN	GTP-binding protein 1 (G-protein 1) (GP-1) (GP1)	GTPBP1
O00192	O00192_T642	0.42445	0.179134	O00192	ARVC_HUMAN	Armadillo repeat protein deleted in velo-cardio-facial syndrome	ARVCF
O00192	O00192_S267	-0.194062	NA	O00192	ARVC_HUMAN	Armadillo repeat protein deleted in velo-cardio-facial syndrome	ARVCF
O00192	O00192_S343	NA	NA	O00192	ARVC_HUMAN	Armadillo repeat protein deleted in velo-cardio-facial syndrome	ARVCF
O00192	O00192_S915	#NAME?	NA	O00192	ARVC_HUMAN	Armadillo repeat protein deleted in velo-cardio-facial syndrome	ARVCF
O00193	O00193_S15	-0.488753	0.153359	O00193	SMAP_HUMAN	Small acidic protein	SMAP
O00193	O00193_S17	0.139733	0.455378	O00193	SMAP_HUMAN	Small acidic protein	SMAP
O00203	O00203_S276	0.125647	0.735953	O00203	AP3B1_HUMAN	AP-3 complex subunit beta-1 (Adapter-related protein complex 3 subunit beta-1) (Adaptor protein complex AP-3 subunit beta-1) (Beta-3A-adaptin) (Clathrin assembly protein complex 3 beta-1 large chain)	AP3B1
O00203	O00203_S609	-1.20782	NA	O00203	AP3B1_HUMAN	AP-3 complex subunit beta-1 (Adapter-related protein complex 3 subunit beta-1) (Adaptor protein complex AP-3 subunit beta-1) (Beta-3A-adaptin) (Clathrin assembly protein complex 3 beta-1 large chain)	AP3B1
O00213	O00213_S205	NA	NA	O00213	APBB1_HUMAN	Amyloid beta A4 precursor protein-binding family B member 1 (Protein Fe65)	APBB1
O00221	O00221_S183	0.399843	NA	O00221	IKBE_HUMAN	NF-kappa-B inhibitor epsilon (NF-kappa-BIE) (I-kappa-B-epsilon) (IkB-E) (IkB-epsilon) (IkappaBepsilon)	NFKBIE
O00231	O00231_S14	-0.577144	0.212156	O00231	PSD11_HUMAN	26S proteasome non-ATPase regulatory subunit 11 (26S proteasome regulatory subunit RPN6) (26S proteasome regulatory subunit S9) (26S proteasome regulatory subunit p44.5)	PSMD11
O00255	O00255_S492	-2.02237	0.419672	O00255	MEN1_HUMAN	Menin	MEN1
O00257	O00257_S291	0.716176	NA	O00257	CBX4_HUMAN	E3 SUMO-protein ligase CBX4 (EC 6.3.2.-) (Chromobox protein homolog 4) (Polycomb 2 homolog) (Pc2) (hPc2)	CBX4
O00257	O00257_S415	-0.919897	NA	O00257	CBX4_HUMAN	E3 SUMO-protein ligase CBX4 (EC 6.3.2.-) (Chromobox protein homolog 4) (Polycomb 2 homolog) (Pc2) (hPc2)	CBX4
O00264	O00264_S57	0.52806	0.349994	O00264	PGRC1_HUMAN	Membrane-associated progesterone receptor component 1 (mPR)	PGRMC1
O00264	O00264_S181	-0.140714	0.816177	O00264	PGRC1_HUMAN	Membrane-associated progesterone receptor component 1 (mPR)	PGRMC1
O00264	O00264_S54	#NAME?	NA	O00264	PGRC1_HUMAN	Membrane-associated progesterone receptor component 1 (mPR)	PGRMC1
O00267	O00267_S666	-1.15514	0.402827	O00267	SPT5H_HUMAN	Transcription elongation factor SPT5 (hSPT5) (DRB sensitivity-inducing factor 160 kDa subunit) (DSIF p160) (DRB sensitivity-inducing factor large subunit) (DSIF large subunit) (Tat-cotransactivator 1 protein) (Tat-CT1 protein)	SUPT5H
O00267	O00267_T1034	-0.0124332	0.966328	O00267	SPT5H_HUMAN	Transcription elongation factor SPT5 (hSPT5) (DRB sensitivity-inducing factor 160 kDa subunit) (DSIF p160) (DRB sensitivity-inducing factor large subunit) (DSIF large subunit) (Tat-cotransactivator 1 protein) (Tat-CT1 protein)	SUPT5H
O00267	O00267_S671	0.585556	NA	O00267	SPT5H_HUMAN	Transcription elongation factor SPT5 (hSPT5) (DRB sensitivity-inducing factor 160 kDa subunit) (DSIF p160) (DRB sensitivity-inducing factor large subunit) (DSIF large subunit) (Tat-cotransactivator 1 protein) (Tat-CT1 protein)	SUPT5H
O00267	O00267_T806	-1.10043	NA	O00267	SPT5H_HUMAN	Transcription elongation factor SPT5 (hSPT5) (DRB sensitivity-inducing factor 160 kDa subunit) (DSIF p160) (DRB sensitivity-inducing factor large subunit) (DSIF large subunit) (Tat-cotransactivator 1 protein) (Tat-CT1 protein)	SUPT5H
O00268	O00268_S543	-1.50703	0.0135378	O00268	TAF4_HUMAN	Transcription initiation factor TFIID subunit 4 (RNA polymerase II TBP-associated factor subunit C) (TBP-associated factor 4) (Transcription initiation factor TFIID 130 kDa subunit) (TAF(II)130) (TAFII-130) (TAFII130) (Transcription initiation factor TFIID 135 kDa subunit) (TAF(II)135) (TAFII-135) (TAFII135)	TAF4
O00268	O00268_S109	NA	NA	O00268	TAF4_HUMAN	Transcription initiation factor TFIID subunit 4 (RNA polymerase II TBP-associated factor subunit C) (TBP-associated factor 4) (Transcription initiation factor TFIID 130 kDa subunit) (TAF(II)130) (TAFII-130) (TAFII130) (Transcription initiation factor TFIID 135 kDa subunit) (TAF(II)135) (TAFII-135) (TAFII135)	TAF4
O00273	O00273_T231	1.3604	0.000657338	O00273	DFFA_HUMAN	DNA fragmentation factor subunit alpha (DNA fragmentation factor 45 kDa subunit) (DFF-45) (Inhibitor of CAD) (ICAD)	DFFA
O00273	O00273_S315	0.0276817	0.865487	O00273	DFFA_HUMAN	DNA fragmentation factor subunit alpha (DNA fragmentation factor 45 kDa subunit) (DFF-45) (Inhibitor of CAD) (ICAD)	DFFA
O00287	O00287_S179	-0.476289	0.510437	O00287	RFXAP_HUMAN	Regulatory factor X-associated protein (RFX-associated protein) (RFX DNA-binding complex 36 kDa subunit)	RFXAP
O00299	O00299_S156	-0.309181	NA	O00299	CLIC1_HUMAN	Chloride intracellular channel protein 1 (Chloride channel ABP) (Nuclear chloride ion channel 27) (NCC27) (Regulatory nuclear chloride ion channel protein) (hRNCC)	CLIC1
O00299	O00299_T155	Inf	NA	O00299	CLIC1_HUMAN	Chloride intracellular channel protein 1 (Chloride channel ABP) (Nuclear chloride ion channel 27) (NCC27) (Regulatory nuclear chloride ion channel protein) (hRNCC)	CLIC1
O00303	O00303_S258	0.061128	0.911068	O00303	EIF3F_HUMAN	Eukaryotic translation initiation factor 3 subunit F (eIF3f) (Deubiquitinating enzyme eIF3f) (EC 3.4.19.12) (Eukaryotic translation initiation factor 3 subunit 5) (eIF-3-epsilon) (eIF3 p47)	EIF3F
O00327	O00327_S42	0.25015	NA	O00327	BMAL1_HUMAN	Aryl hydrocarbon receptor nuclear translocator-like protein 1 (Basic-helix-loop-helix-PAS protein MOP3) (Brain and muscle ARNT-like 1) (Class E basic helix-loop-helix protein 5) (bHLHe5) (Member of PAS protein 3) (PAS domain-containing protein 3) (bHLH-PAS protein JAP3)	ARNTL
O00401	O00401_Y256	0.204315	0.704201	O00401	WASL_HUMAN	Neural Wiskott-Aldrich syndrome protein (N-WASP)	WASL
O00418	O00418_S18	-0.460719	0.340673	O00418	EF2K_HUMAN	Eukaryotic elongation factor 2 kinase (eEF-2 kinase) (eEF-2K) (EC 2.7.11.20) (Calcium/calmodulin-dependent eukaryotic elongation factor 2 kinase)	EEF2K
O00418	O00418_S445	-0.225105	0.718619	O00418	EF2K_HUMAN	Eukaryotic elongation factor 2 kinase (eEF-2 kinase) (eEF-2K) (EC 2.7.11.20) (Calcium/calmodulin-dependent eukaryotic elongation factor 2 kinase)	EEF2K
O00418	O00418_S474	-0.427426	NA	O00418	EF2K_HUMAN	Eukaryotic elongation factor 2 kinase (eEF-2 kinase) (eEF-2K) (EC 2.7.11.20) (Calcium/calmodulin-dependent eukaryotic elongation factor 2 kinase)	EEF2K
O00423	O00423_S113	0.731549	0.00266074	O00423	EMAL1_HUMAN	Echinoderm microtubule-associated protein-like 1 (EMAP-1) (HuEMAP-1)	EML1
O00429	O00429_S616	-0.63638	0.378451	O00429	DNM1L_HUMAN	Dynamin-1-like protein (EC 3.6.5.5) (Dnm1p/Vps1p-like protein) (DVLP) (Dynamin family member proline-rich carboxyl-terminal domain less) (Dymple) (Dynamin-like protein) (Dynamin-like protein 4) (Dynamin-like protein IV) (HdynIV) (Dynamin-related protein 1)	DNM1L
O00429	O00429_S529	-0.232278	0.785774	O00429	DNM1L_HUMAN	Dynamin-1-like protein (EC 3.6.5.5) (Dnm1p/Vps1p-like protein) (DVLP) (Dynamin family member proline-rich carboxyl-terminal domain less) (Dymple) (Dynamin-like protein) (Dynamin-like protein 4) (Dynamin-like protein IV) (HdynIV) (Dynamin-related protein 1)	DNM1L
O00443	O00443_S259	0.267511	0.366163	O00443	P3C2A_HUMAN	Phosphatidylinositol 4-phosphate 3-kinase C2 domain-containing subunit alpha (PI3K-C2-alpha) (PtdIns-3-kinase C2 subunit alpha) (EC 2.7.1.154) (Phosphoinositide 3-kinase-C2-alpha)	PIK3C2A
O00443	O00443_S338	-0.0223529	0.820758	O00443	P3C2A_HUMAN	Phosphatidylinositol 4-phosphate 3-kinase C2 domain-containing subunit alpha (PI3K-C2-alpha) (PtdIns-3-kinase C2 subunit alpha) (EC 2.7.1.154) (Phosphoinositide 3-kinase-C2-alpha)	PIK3C2A
O00459	O00459_S262	0.0464505	0.970488	O00459	P85B_HUMAN	Phosphatidylinositol 3-kinase regulatory subunit beta (PI3-kinase regulatory subunit beta) (PI3K regulatory subunit beta) (PtdIns-3-kinase regulatory subunit beta) (Phosphatidylinositol 3-kinase 85 kDa regulatory subunit beta) (PI3-kinase subunit p85-beta) (PtdIns-3-kinase regulatory subunit p85-beta)	PIK3R2
O00472	O00472_S503	0.240735	NA	O00472	ELL2_HUMAN	RNA polymerase II elongation factor ELL2	ELL2
O00499	O00499_S303	0.195372	0.0972829	O00499	BIN1_HUMAN	Myc box-dependent-interacting protein 1 (Amphiphysin II) (Amphiphysin-like protein) (Box-dependent myc-interacting protein 1) (Bridging integrator 1)	BIN1
O00499	O00499_S298,O00499_S303	0.244453	0.25751	O00499	BIN1_HUMAN	Myc box-dependent-interacting protein 1 (Amphiphysin II) (Amphiphysin-like protein) (Box-dependent myc-interacting protein 1) (Bridging integrator 1)	BIN1
O00499	O00499_S331	0.398835	0.420486	O00499	BIN1_HUMAN	Myc box-dependent-interacting protein 1 (Amphiphysin II) (Amphiphysin-like protein) (Box-dependent myc-interacting protein 1) (Bridging integrator 1)	BIN1
O00499	O00499_S298	0.118421	0.477156	O00499	BIN1_HUMAN	Myc box-dependent-interacting protein 1 (Amphiphysin II) (Amphiphysin-like protein) (Box-dependent myc-interacting protein 1) (Bridging integrator 1)	BIN1
O00499	O00499_S296	-0.130249	0.775857	O00499	BIN1_HUMAN	Myc box-dependent-interacting protein 1 (Amphiphysin II) (Amphiphysin-like protein) (Box-dependent myc-interacting protein 1) (Bridging integrator 1)	BIN1
O00505	O00505_S56,O00505_S60	0.713536	0.00122618	O00505	IMA3_HUMAN	Importin subunit alpha-3 (Importin alpha Q2) (Qip2) (Karyopherin subunit alpha-3) (SRP1-gamma)	KPNA3
O00505	O00505_S60	0.599897	0.102992	O00505	IMA3_HUMAN	Importin subunit alpha-3 (Importin alpha Q2) (Qip2) (Karyopherin subunit alpha-3) (SRP1-gamma)	KPNA3
O00512	O00512_T155	0.665593	0.0383493	O00512	BCL9_HUMAN	B-cell CLL/lymphoma 9 protein (B-cell lymphoma 9 protein) (Bcl-9) (Protein legless homolog)	BCL9
O00512	O00512_S917	0.78176	0.448978	O00512	BCL9_HUMAN	B-cell CLL/lymphoma 9 protein (B-cell lymphoma 9 protein) (Bcl-9) (Protein legless homolog)	BCL9
O00512	O00512_T315	-0.29133	0.572347	O00512	BCL9_HUMAN	B-cell CLL/lymphoma 9 protein (B-cell lymphoma 9 protein) (Bcl-9) (Protein legless homolog)	BCL9
O00512	O00512_S687	-0.0361002	0.876003	O00512	BCL9_HUMAN	B-cell CLL/lymphoma 9 protein (B-cell lymphoma 9 protein) (Bcl-9) (Protein legless homolog)	BCL9
O00512	O00512_S104	-0.461532	NA	O00512	BCL9_HUMAN	B-cell CLL/lymphoma 9 protein (B-cell lymphoma 9 protein) (Bcl-9) (Protein legless homolog)	BCL9
O00526	O00526_S136,O00526_T137	0.50416	0.474352	O00526	UPK2_HUMAN	Uroplakin-2 (UP2) (Uroplakin II) (UPII)	UPK2
O00559	O00559_S36	-0.65188	0.00402533	O00559	RCAS1_HUMAN	Receptor-binding cancer antigen expressed on SiSo cells (Cancer-associated surface antigen RCAS1) (Estrogen receptor-binding fragment-associated gene 9 protein)	EBAG9
O00560	O00560_S6	-0.552218	0.48193	O00560	SDCB1_HUMAN	Syntenin-1 (Melanoma differentiation-associated protein 9) (MDA-9) (Pro-TGF-alpha cytoplasmic domain-interacting protein 18) (TACIP18) (Scaffold protein Pbp1) (Syndecan-binding protein 1)	SDCBP
O00562	O00562_S593	-0.255868	0.565655	O00562	PITM1_HUMAN	Membrane-associated phosphatidylinositol transfer protein 1 (Drosophila retinal degeneration B homolog) (Phosphatidylinositol transfer protein, membrane-associated 1) (PITPnm 1) (Pyk2 N-terminal domain-interacting receptor 2) (NIR-2)	PITPNM1
O00562	O00562_S373	-0.38488	0.727338	O00562	PITM1_HUMAN	Membrane-associated phosphatidylinositol transfer protein 1 (Drosophila retinal degeneration B homolog) (Phosphatidylinositol transfer protein, membrane-associated 1) (PITPnm 1) (Pyk2 N-terminal domain-interacting receptor 2) (NIR-2)	PITPNM1
O00562	O00562_S315	-0.020283	0.967364	O00562	PITM1_HUMAN	Membrane-associated phosphatidylinositol transfer protein 1 (Drosophila retinal degeneration B homolog) (Phosphatidylinositol transfer protein, membrane-associated 1) (PITPnm 1) (Pyk2 N-terminal domain-interacting receptor 2) (NIR-2)	PITPNM1
O00562	O00562_S300	-0.0582285	NA	O00562	PITM1_HUMAN	Membrane-associated phosphatidylinositol transfer protein 1 (Drosophila retinal degeneration B homolog) (Phosphatidylinositol transfer protein, membrane-associated 1) (PITPnm 1) (Pyk2 N-terminal domain-interacting receptor 2) (NIR-2)	PITPNM1
O00562	O00562_T665	#NAME?	NA	O00562	PITM1_HUMAN	Membrane-associated phosphatidylinositol transfer protein 1 (Drosophila retinal degeneration B homolog) (Phosphatidylinositol transfer protein, membrane-associated 1) (PITPnm 1) (Pyk2 N-terminal domain-interacting receptor 2) (NIR-2)	PITPNM1
[truncated: 14,357 more rows]

## Sheet: Colo741PRKACA-phospho
Protein	mod_sites	DMSO.DOX_log2FC	DMSO.DOX_pvalue	uniprot_ac	Protein_name	Protein_desc	Gene.names
[truncated: 12,081 more rows]

[truncated: 12 more sheets: ML1PRKACA-phospho, ML1PRKAR1A-phospho, 639VPRKACAphosfate, 639VPRKAR1Aphosfate, Colo741PRKACAphosfate, ML1PRKACAphosfate, ML1PRKAR1Aphosfate, 639VPRKACAMIBs, 639VPRKAR1AMIBs, Colo741PRKACAMIBs, ML1PRKACAMIBs, ML1PRKAR1AMIBs]
