# Supplementary material for: Oncogenic PKA signaling increases c-MYC protein expression through multiple targetable mechanisms
Source: eLife. 2023 Jan 24;12:e69521. doi: 10.7554/eLife.69521 (PMC9925115; doi:10.7554/eLife.69521)
Supplement: Supplementary file 3. [file elife-69521-supp3.xlsx]

## Sheet: Sheet1
genes	pval	fdr
CSNK2A1	0	0
MAP2K1	0	0
DYRK1B	0	0
DYRK2	0	0
SGK1	0	0
NLK	0	0
EPHA2	0	0
LYN	0	0
MAPK13	0	0
AURKB	0	0
HIPK2	0	0
PRKAA1	0	0
ATR	0	0
PRKACA	0	0
SRC	0	0
CAMK1	0	0
PRKD2	1.42857e-05	0.00917636
AKT2	1.42857e-05	0.00866657
RAF1	1.42857e-05	0.00821043
MKNK1	1.42857e-05	0.00779991
CDK1	1.42857e-05	0.00742849
UHMK1	1.42857e-05	0.00709083
MAPK11	1.42857e-05	0.00678253
PRKG2	1.42857e-05	0.00649992
PAK1	1.42857e-05	0.00623993
CDK16	1.42857e-05	0.00599993
YES1	2.85714e-05	0.0115554
EPHB2	2.85714e-05	0.0111427
PRKDC	2.85714e-05	0.0107585
AKT1	2.85714e-05	0.0103999
MAPK14	2.85714e-05	0.0100644
CDK20	2.85714e-05	0.00974989
MTOR	2.85714e-05	0.00945444
PDK4	2.85714e-05	0.00917636
DYRK1A	4.28571e-05	0.0133713
MAP3K10	4.28571e-05	0.0129998
MAPK9	4.28571e-05	0.0126485
CDC7	4.28571e-05	0.0123156
ATM	4.28571e-05	0.0119999
CSNK1A1	4.28571e-05	0.0116999
AXL	5.71429e-05	0.0152193
PKMYT1	5.71429e-05	0.014857
RPS6KA3	5.71429e-05	0.0145115
CHEK2	5.71429e-05	0.0141817
STK38	5.71429e-05	0.0138665
PRKCA	5.71429e-05	0.0135651
CDK3	5.71429e-05	0.0132764
PLK2	5.71429e-05	0.0129998
CAMK2B	7.14286e-05	0.0159182
SLK	7.14286e-05	0.0155998
PDK1	7.14286e-05	0.0152939
SMG1	8.57143e-05	0.0179998
NEK2	8.57143e-05	0.0176602
PDK3	8.57143e-05	0.0173331
CAMK2G	0.0001	0.0198543
MAPK1	0.0001	0.0194998
TRPM7	0.0001	0.0191577
NEK6	0.0001	0.0188274
CHEK1	0.000114286	0.0211523
MAPKAPK2	0.000114286	0.0207998
MAPK15	0.000114286	0.0204588
EEF2K	0.000128571	0.0226449
STK25	0.000128571	0.0222855
ROCK1	0.000128571	0.0219372
PRKCQ	0.000128571	0.0215997
PRKG1	0.000128571	0.0212725
RPS6KA1	0.000128571	0.020955
PKN2	0.000128571	0.0206468
PLK3	0.000128571	0.0203476
PRKAA2	0.000128571	0.0200569
PDK2	0.000128571	0.0197744
LIMK2	0.000142857	0.0216664
PRKCD	0.000142857	0.0213696
CLK1	0.000142857	0.0210808
EIF2AK2	0.000142857	0.0207998
IRAK1	0.000157143	0.0225787
MARK2	0.000157143	0.0222855
STMN1	0.000171429	0.0239997
PAK2	0.000171429	0.0236959
MAP3K8	0.000185714	0.0253497
BMPR2	0.0002	0.0269626
PRKCE	0.0002	0.0266338
MOS	0.000214286	0.0281924
RPS6KB2	0.000228571	0.0297139
RPS6KB1	0.000228571	0.0293644
MAPK7	0.000228571	0.0290229
LIMK1	0.000228571	0.0286893
INSR	0.000228571	0.0283633
MAP2K4	0.000242857	0.0297974
GSK3A	0.000242857	0.0294663
STK39	0.000271429	0.0325711
CDK9	0.000271429	0.032217
CDK5	0.000271429	0.0318706
PRKD1	0.0003	0.0348507
STK3	0.000328571	0.037768
MAPK10	0.000328571	0.0373746
MAP3K2	0.000371429	0.0418139
NEK9	0.000371429	0.0413873
VRK2	0.000371429	0.0409692
ROCK2	0.000385714	0.0421195
CAMK2D	0.000414286	0.0447916
VRK1	0.000414286	0.0443524
MAK	0.000414286	0.0439218
MAPK3	0.000428571	0.0449995
CLK2	0.000428571	0.0445709
LATS2	0.000428571	0.0441504
CCNYL1	0.000442857	0.0451957
PLK1	0.000457143	0.0462217
LATS1	0.000471429	0.0472288
MET	0.000485714	0.0482176
MAP3K7	0.0005	0.0491886
MYH9	0.000514286	0.0501423
DYRK4	0.000514286	0.0496985
PRKCB	0.000514286	0.0492626
CAMK2A	0.000528571	0.0501907
MAPK8	0.000542857	0.0511029
MKNK2	0.000571429	0.0533327
CSNK2A2	0.000585714	0.0542028
CDK6	0.000585714	0.0537473
MLK4	0.0006	0.0545994
PRKCH	0.000614286	0.0554374
CDK2	0.000642857	0.0575403
EGFR	0.000657143	0.0583408
PBK	0.000685714	0.0603864
CAMK4	0.0007	0.0611513
TTK	0.000714286	0.061904
PRKCZ	0.000714286	0.0614166
MAP2K6	0.000728571	0.0621555
IGF1R	0.000742857	0.062883
CSNK1G3	0.000757143	0.0635993
PPP1R13L	0.000871429	0.0726404
MYLK	0.000885714	0.0732719
CDK5R1	0.000942857	0.0774126
MAP2K2	0.000957143	0.0779991
AATK	0.001	0.0808879
EPHA4	0.001	0.0802932
MAP2K5	0.00104286	0.0831231
LMTK2	0.00118571	0.093825
MAP2K3	0.00122857	0.0965169
NFE2L1	0.00124286	0.0969417
MERTK	0.00132857	0.102892
STK33	0.00134286	0.103266
PRKCI	0.00134286	0.102544
MAPK6	0.00135714	0.102915
RP1	0.00135714	0.102206
MAP4K4	0.00144286	0.107917
RPS6KA4	0.00147143	0.109305
STK38L	0.00157143	0.115945
PAK4	0.0016	0.11726
BAG6	0.00162857	0.118559
EPHB4	0.0017	0.122939
GAS6	0.00172857	0.124183
ULK1	0.00174286	0.124391
CAMKK2	0.00174286	0.123583
PTK2	0.00177143	0.124799
GSK3B	0.0018	0.125999
PDHA2	0.00184286	0.128177
WNK2	0.00188571	0.130328
STRADA	0.00195714	0.134414
CAB39	0.00198571	0.135523
MAP2	0.00208571	0.141464
FER	0.00211429	0.142517
MAP3K12	0.00215714	0.144514
BRSK1	0.00217143	0.144584
BRSK2	0.0022	0.145598
LIN52	0.00228571	0.15036
RET	0.00252857	0.165339
PDPK1	0.00254286	0.165284
AKT3	0.00258571	0.167075
CSNK1D	0.00258571	0.166092
AURKA	0.00265714	0.169682
LIN37	0.00267143	0.169603
CDK7	0.00267143	0.168622
PRKD3	0.00271429	0.170343
LIN54	0.00272857	0.170261
RIPK2	0.0029	0.17993
STK4	0.00291429	0.179795
ARAF	0.00292857	0.179661
LIN9	0.00302857	0.184758
TLK1	0.00331429	0.201064
TWF1	0.00354286	0.213743
ULK3	0.00381429	0.228854
RP1L1	0.00381429	0.227604
FYN	0.00392857	0.233149
TP53INP1	0.00398571	0.235262
WTAP	0.00398571	0.233997
MDM4	0.00445714	0.260275
LRRK2	0.00451429	0.26221
TBK1	0.0047	0.271552
PPP1R2	0.00481429	0.276692
SH3RF1	0.00497143	0.284227
MAPT	0.00498571	0.283559
MAP3K1	0.00508571	0.287748
DAPK3	0.00521429	0.293502
SGK3	0.00521429	0.291997
WNK1	0.00522857	0.291303
MAP3K5	0.00524286	0.290616
MARK3	0.00527143	0.290724
FOXO4	0.00532857	0.292399
CHUK	0.00534286	0.291717
RPS6KA5	0.00534286	0.290265
BUB1	0.00542857	0.293462
ACVR1	0.0055	0.295859
FOXO1	0.00552857	0.295938
MAP3K6	0.00561429	0.29906
STRADB	0.00568571	0.301395
PDHX	0.00572857	0.302199
CDK4	0.00572857	0.300747
DLAT	0.00574286	0.300054
WNK4	0.00624286	0.324625
STK11	0.00641429	0.331958
PDHA1	0.00641429	0.330392
CSNK2B	0.00648571	0.332503
BRAF	0.00685714	0.349902
FOXO3	0.00688571	0.349726
ALK	0.0071	0.35894
TAOK1	0.0071	0.357286
TAB1	0.0072	0.360656
CCNB2	0.00764286	0.381091
MAP3K3	0.00777143	0.385741
WEE1	0.00788571	0.389643
CSNK1G1	0.008	0.393509
ABL2	0.00801429	0.392444
CDK11B	0.00805714	0.392781
ATF4	0.00817143	0.396582
RIOK2	0.0082	0.396208
PDHB	0.00824286	0.396524
EIF4E1B	0.00838571	0.401627
KCNJ1	0.00854286	0.407366
DAPK1	0.00858571	0.40763
MAPK12	0.00868571	0.410593
IQGAP1	0.00878571	0.41353
IKBKB	0.00905714	0.424476
MAP2K7	0.0091	0.424662
BCKDK	0.0095	0.441442
TAB2	0.00974286	0.450808
RIPK3	0.00977143	0.450223
PHKG2	0.00985714	0.452264
DKFZP686N2325	0.00987143	0.451024
SETX	0.00988571	0.449795
CREB5	0.00994286	0.450518
PKM	0.00995714	0.449301
REST	0.00998571	0.448736
CETN3	0.00998571	0.446896
ATF6B	0.0102	0.454623
SHC3	0.0103714	0.460385
SND1	0.0104714	0.462942
CSNK1E	0.0104857	0.461704
PRKAG3	0.0111857	0.490549
CFL2	0.0112286	0.490458
MOB2	0.0112429	0.489126
PAK3	0.0113286	0.490899
PRPF4B	0.0115714	0.499441
RAPTOR	0.0116	0.498703
PRKAG1	0.0118714	0.508371
MOB1A	0.0119429	0.509432
HNF1ALPHA	0.0121	0.514126
CDK19	0.0121143	0.512738
CREB3L4	0.0122714	0.517384
TSC2	0.0123	0.516594
PRKCG	0.0123286	0.51581
GTF2IRD1	0.0123286	0.513841
ERBB2	0.0123429	0.512481
CENPJ	0.0124857	0.516449
PRKAG2	0.0125	0.515088
CREB3L2	0.0125286	0.514325
AIMP1	0.0126571	0.517657
RASSF6	0.0126571	0.515725
TBC1D7	0.0127571	0.517868
PEBP1	0.0127714	0.516527
CREB3L3	0.0128714	0.518651
RASA1	0.0129286	0.519038
THAP12	0.0131	0.523994
MARK1	0.0131286	0.52322
MOB1B	0.0132714	0.52699
GAB1	0.0132857	0.525646
LSP1	0.0133	0.524312
CDK8	0.0133143	0.522987
EPHA1	0.0135	0.528381
ETV1	0.0135143	0.527051
PPP1CA	0.0137143	0.532948
MLKL	0.0138857	0.537696
PKN3	0.0139429	0.538001
PPP1CC	0.0139571	0.536656
PPP2CB	0.0140714	0.539152
CDC25B	0.0141	0.538357
NPM1	0.0141286	0.537569
SAV1	0.0141429	0.536244
PAK5	0.0141429	0.534388
PLA2G4A	0.0143	0.538463
PAK6	0.0143429	0.538221
SCNN1D	0.0144	0.538514
PFKFB1	0.0144143	0.537209
WTIP	0.0144143	0.535382
PTS	0.0144429	0.534624
GRB14	0.0145286	0.53598
TYRO3	0.0145714	0.535751
EPHA3	0.0146143	0.535524
EPHB1	0.0146429	0.534776
EPHA5	0.0146429	0.532994
EPHA7	0.0146429	0.531223
MAPKAP1	0.0147857	0.53463
EFNB3	0.0149143	0.537499
RASSF3	0.0149571	0.53727
CREB3L1	0.0149857	0.536531
GAB3	0.0149857	0.534778
PRR5	0.0150429	0.535069
SCNN1A	0.0150429	0.533331
SCNN1B	0.0151143	0.53413
EFNA5	0.0152571	0.537439
EPHA8	0.0152857	0.536714
EIF4G2	0.0152857	0.534994
CREB3	0.0153429	0.535278
SHC4	0.0153429	0.533573
KSR1	0.0153857	0.533365
EPHA6	0.0154429	0.533652
EPHA10	0.0155429	0.535413
EPHB6	0.0155571	0.53422
AKT1S1	0.0155857	0.533524
KIF13B	0.0156571	0.534294
SCNN1G	0.0156714	0.533115
AATF	0.0157571	0.534366
CD80	0.0157714	0.533195
EFNA2	0.0158714	0.53492
EFNA4	0.0159286	0.535194
EFNA3	0.0160429	0.53738
MLST8	0.0160714	0.536691
SKOR1	0.0162571	0.541238
PIM1	0.0162714	0.540067
EFNB1	0.0164	0.542685
CAMKK1	0.0164	0.541045
EPHB3	0.0164429	0.540825
DUSP3	0.0167	0.547633
HUNK	0.0167571	0.547862
PRKAR1A	0.0169143	0.551349
ARHGEF28	0.0170286	0.553422
DUSP6	0.0171857	0.556872
MAP1S	0.0172857	0.558455
PPARD	0.0173286	0.558188
EFNB2	0.0174286	0.559758
GAB2	0.0176	0.563606
RASAL2	0.0176429	0.563327
MPP1	0.0176571	0.562139
CABLES2	0.0176714	0.560959
SHC2	0.0177429	0.561593
SHC1	0.0177429	0.55997
CDKL5	0.0181571	0.571394
RICTOR	0.0181714	0.5702
SPIC	0.0182143	0.569907
PPP2R5D	0.0182429	0.569171
CAB39L	0.0183571	0.571104
PPP2R1B	0.0183571	0.569482
PPP1R12A	0.0184429	0.57052
PRKAB1	0.0184857	0.570231
DUSP4	0.0185	0.569064
CD28	0.0185571	0.569218
EIF4E2	0.0186143	0.569372
PPP2R1A	0.0186571	0.569088
PRKAB2	0.0186714	0.567938
SLC8A3	0.0186857	0.566793
DUSP10	0.0188	0.56868
CSNK2A3	0.0188714	0.569264
DUSP7	0.0188714	0.567696
AMOTL2	0.0188714	0.566136
RPTOR	0.0190143	0.568859
SLC8A2	0.0190429	0.568157
YWHAG	0.0191286	0.56916
RASSF4	0.0191714	0.568885
DUSP18	0.0192	0.568189
PPP2R2B	0.0192143	0.567074
ATP2B3	0.0193143	0.568489
DUSP8	0.0194429	0.570735
MRVI1	0.0194571	0.569623
SH2D2A	0.0195571	0.57102
MYL12A	0.0195571	0.569497
ATG101	0.0195714	0.568398
AMOTL1	0.0195857	0.567304
PPP1R17	0.0195857	0.565803
PMCA2	0.0196	0.564722
RHEB	0.0196714	0.565288
DUSP12	0.0197143	0.565033
WNK3	0.0197143	0.563554
PIK3CB	0.0197143	0.562082
SPR	0.0197143	0.560618
DUSP14	0.0197429	0.559973
CCNA2	0.0199143	0.563372
PIK3CA	0.0199571	0.563125
MYB	0.0200286	0.563684
RPS6KA2	0.0200286	0.562235
PIK3R2	0.0200571	0.561593
CSNK2B-LY6G5B-562	0.0201	0.561354
DUSP21	0.0201	0.559922
DUSP5	0.0201714	0.560482
DUSP2	0.0203143	0.563019
LAMTOR2	0.0203143	0.561593
NCAPD2	0.0203571	0.561357
JAK1	0.0203714	0.560336
TBX5	0.0204	0.559712
CD86	0.0204714	0.560264
DUSP19	0.0205286	0.560423
NRAS	0.0205714	0.560193
CSNK2B-LY6G5B-1072	0.0206286	0.560352
NGEF	0.0207143	0.561284
PPP1R3A	0.0207571	0.561053
FGF11	0.0207857	0.560438
DUSP16	0.0209	0.562131
NUAK1	0.0209714	0.562667
LIPE	0.0212286	0.56817
FOXM1	0.0212857	0.568306
PPP2R2D	0.0213	0.567301
PDAP1	0.0213286	0.56668
PPP1R3E	0.0213714	0.56644
KRAS	0.0213857	0.565446
FGF14	0.0214714	0.566341
TRPV4	0.0215429	0.566856
MCMBP	0.0215714	0.566243
PPP1R3D	0.0216	0.565634
IRS1	0.0216	0.564281
PFKFB2	0.0217	0.56554
DLD	0.0218143	0.567165
FGF12	0.0218571	0.566929
THEM4	0.0218857	0.566325
MLYCD	0.0219857	0.567568
ATP2B2	0.0220429	0.567701
FRAT1	0.0220571	0.566732
TIAM1	0.0220857	0.566134
PTPN7	0.0220857	0.564808
KIAA1549	0.0220857	0.563489
LAMTOR3	0.0221143	0.562903
MARCKS	0.0221429	0.562319
SLIRP	0.0222	0.562462
KCNMB4	0.0222429	0.562243
FAM131B	0.0223286	0.563107
POGZ	0.0223286	0.561809
KCNU1	0.0223429	0.560876
FLJ23306	0.0223429	0.55959
PPP2R2C	0.0223857	0.55938
GADD45G	0.0223857	0.558103
DUSP9	0.0224429	0.558253
PDE4D	0.0224429	0.556984
SLC2A5	0.0224429	0.555721
CDC25A	0.0224714	0.55517
FRS3	0.0224857	0.554269
PPM1E	0.0225429	0.554426
TSC22D3	0.0225571	0.553531
PTPRR	0.0225571	0.55229
CDC25C	0.0225714	0.551403
DKFZP686G14213	0.0225714	0.550172
ESF1	0.0225857	0.549294
PPP1R3B	0.0225857	0.548074
ACP1	0.0225857	0.546858
PPP2R5A	0.0226286	0.546684
GRAP	0.0226714	0.54651
CSK	0.0227	0.545994
PTPN5	0.0227	0.544794
PPP2R5E	0.0227	0.543599
CDKN3	0.0227143	0.542751
AMBRA1	0.0227286	0.541906
PPP2R5B	0.0227286	0.540726
FRAT2	0.0227714	0.540568
CFL1	0.0228571	0.541425
AGK	0.0228714	0.540591
NCAPH	0.0229286	0.540771
IL17RD	0.023	0.541287
TAOK2	0.023	0.540123
ZNF397	0.0230857	0.540972
ERBB3	0.0231	0.540148
ADCY6	0.0231143	0.539327
GTF2F1	0.0231286	0.53851
FGF13	0.0231571	0.538028
DSCAM	0.0232143	0.53821
KCNMB1	0.0232286	0.537401
FRS2	0.0233286	0.538573
PDE3B	0.0233429	0.537766
EIF2AK1	0.0233429	0.536634
KCNMB3	0.0233571	0.535834
TCL1B	0.0234714	0.537327
ADCY4	0.0234714	0.536203
GUCY1A3	0.0234857	0.535409
ANKRD12	0.0235	0.534619
VAV3	0.0235286	0.534156
SESN3	0.0235571	0.533695
CIB1	0.0235857	0.533236
MTCP1	0.0235857	0.532134
MAP3K4	0.0236	0.531359
MOK	0.0236286	0.530907
SNX27	0.0237	0.531419
G6PC3	0.0237429	0.531289
PPP2R5C	0.0238143	0.531798
ZNF703	0.0238143	0.530712
TCL1A	0.0238286	0.529949
PDE4A	0.0238429	0.529189
PPM1A	0.0238714	0.528748
DKFZP686J04131	0.0238857	0.527994
DEF8	0.0239	0.527242
STAT6	0.0239143	0.526494
GUCY1A2	0.0239571	0.526376
PDE3A	0.0239714	0.525632
FGF21	0.0239857	0.524892
CHRNA7	0.0239857	0.523842
KCNMB2	0.024	0.523108
TSC1	0.0240143	0.522376
PAPSS1	0.0240286	0.521648
IRS4	0.0240429	0.520923
ADCY8	0.0240429	0.519891
PIK3CG	0.0240714	0.51948
AURKC	0.0240714	0.518456
PPP2R2A	0.0241143	0.518356
CABLES1	0.0241429	0.517951
PDE4B	0.0242	0.518159
GTF2I	0.0242286	0.517755
CALML6	0.0242714	0.517658
DAPK2	0.0242857	0.516953
DECR	0.0242857	0.515947
RGS2	0.0243	0.515248
FGF18	0.0243571	0.515459
ADCY2	0.0243714	0.514764
ADIPOR1	0.0243857	0.514071
VEGFA	0.0244	0.513381
ABL1	0.0244	0.512394
LANCL3	0.0244286	0.512009
ENPP1	0.0244286	0.511029
EFNA1	0.0244857	0.511245
CHRM5	0.0245571	0.511757
ADCY1	0.0245571	0.510783
CALML4	0.0245714	0.510108
CALML3	0.0245857	0.509436
ADCY5	0.0246	0.508767
DKFZP586H0919	0.0246143	0.5081
ADCY7	0.0246429	0.50773
CD40	0.0246429	0.506774
CHRM4	0.0246571	0.506114
ADIPOR2	0.0246857	0.50575
ATP2B1	0.0247	0.505095
SESN1	0.0247714	0.505609
RASSF1	0.0248286	0.50583
TRIB2	0.0248571	0.505469
PDE4C	0.0248571	0.504529
CCNB1	0.0248714	0.503883
MYL12B	0.0249429	0.504394
FGF19	0.025	0.504615
PURB	0.0250429	0.504548
HID1	0.0250429	0.503618
NUAK2	0.0250714	0.503266
RNF144A	0.0251286	0.503488
HSPB2	0.0251286	0.502566
PLA2G6	0.0251286	0.501647
ANGPT4	0.0251286	0.500731
RASSF2	0.0251286	0.499819
GIT2	0.0251429	0.499194
DBF4B	0.0251571	0.498571
CDK5R2	0.0251714	0.497951
ZNF516	0.0251714	0.49705
MAST1	0.0251857	0.496435
RAB11FIP2	0.0252143	0.496102
SCN4B	0.0252857	0.496613
ERBB4	0.0253	0.496001
NCAPG	0.0253286	0.495672
FGF16	0.0253429	0.495064
PPP1CB	0.0253429	0.49418
MARCKSL1	0.0253571	0.493577
G6PC	0.0253714	0.492976
AXIN1	0.0253857	0.492378
BUB1B	0.0253857	0.491505
PDGFD	0.0254	0.490911
NASP	0.0255	0.491973
CALML5	0.0255143	0.491381
EIF4EBP1	0.0255714	0.491614
CLEC4M	0.0255857	0.491024
DKFZP313C0640	0.0255857	0.490163
MAF1	0.0256286	0.490124
PCYT1A	0.0256857	0.490358
RHEBL1	0.0257	0.489774
CDKN1B	0.0257143	0.489193
WWC1	0.0257429	0.488885
G6PC2	0.0257571	0.488307
ZNF503	0.0257714	0.487731
MAST3	0.0257714	0.486887
DKFZP686L24211	0.0258286	0.487124
BLK	0.0258571	0.486822
SH3GL1	0.0258714	0.486253
DACT3	0.0259	0.485953
ANKLE2	0.0259143	0.485387
CPEB1	0.0259143	0.484556
PLA2G4C	0.0259286	0.483994
VEGFB	0.0259429	0.483435
GUCY1B3	0.0259714	0.483143
CDKN2D	0.0259714	0.482321
DUSP1	0.026	0.482032
MDM2	0.026	0.481215
VRK3	0.0260429	0.481192
CCM2	0.0260429	0.48038
PFKFB4	0.0260571	0.479833
FOSB	0.0260571	0.479025
IRS2	0.0260714	0.478482
ICK	0.0260714	0.477679
PTPN21	0.0260857	0.47714
SLA	0.0261143	0.476864
PLK4	0.0261143	0.476068
SRPK1	0.0262	0.476834
PPP1R9A	0.0262	0.476041
PPAT	0.0262	0.47525
CCNE2	0.0262857	0.476014
CPEB2	0.0263286	0.476001
MYLK2	0.0263571	0.47573
PAQR3	0.0263714	0.475202
TRPV6	0.0263857	0.474677
PDCD4	0.0263857	0.473896
CD38	0.0264	0.473374
ERC1	0.0264	0.472598
PLA2G4E	0.0264	0.471824
DACT1	0.0264143	0.471308
CHRM1	0.0264429	0.471048
CLEC7A	0.0264429	0.470281
PLA2G16	0.0264571	0.46977
ATG13	0.0264571	0.469008
PEA15	0.0264857	0.468753
PLA1A	0.0265	0.468247
RBBP4	0.0265571	0.468499
EIF2AK4	0.0265714	0.467995
LEPROT	0.0265857	0.467492
SH3GLB2	0.0266571	0.467995
RRAGB	0.0266571	0.467243
PCYT1B	0.0266571	0.466495
GABRR1	0.0266714	0.465998
SYDE2	0.0267143	0.466001
UBFD1	0.0267143	0.465258
DCAF5	0.0267429	0.465014
ALPK3	0.0267429	0.464274
RASGEF1B	0.0267571	0.463785
SRCIN1	0.0267571	0.46305
BTBD10	0.0268	0.463058
CEP152	0.0268143	0.462573
PLA2G4D	0.0268429	0.462335
CARD10	0.0268714	0.462099
EVI5	0.0268714	0.461372
DKFZP686B23205	0.0269	0.461138
SGA56M	0.0269	0.460415
PDGFC	0.0269143	0.459938
SYDE1	0.0269143	0.45922
JAZF1	0.0269143	0.458503
PLA2G4F	0.0269286	0.458032
CLEC4E	0.0269429	0.457562
PPP1R12B	0.0269429	0.456852
CPEB4	0.0269429	0.456144
ZFP36L1	0.0269571	0.455679
PCMT1	0.0269714	0.455216
DAB2IP	0.0269714	0.454513
PON2	0.0269857	0.454053
ROR1	0.0269857	0.453355
TRPA1	0.027	0.452898
KDM8	0.0270429	0.452921
FGFR4	0.0270429	0.452228
AIRE	0.0270571	0.451775
SLC2A1	0.0270714	0.451323
SCRG1	0.0270714	0.450635
CRBN	0.0270714	0.449949
CROCC	0.0270857	0.449502
DCBLD2	0.0271	0.449057
SH3BGRL3	0.0271143	0.448613
TPPP3	0.0271143	0.447934
PTN	0.0271286	0.447493
SOS2	0.0271286	0.446818
EPPK1	0.0271571	0.446615
RGS3	0.0271714	0.446178
TTBK1	0.0271857	0.445743
KANK1	0.0272	0.445308
PPP2CA	0.0272143	0.444875
CBY1	0.0272143	0.44421
PDP1	0.0272286	0.44378
CDC42BPG	0.0272429	0.443351
AKAP6	0.0272429	0.442691
UBR4	0.0272571	0.442265
NRG3	0.0272857	0.442072
ARHGEF7	0.0273571	0.442573
TULP4	0.0273714	0.442149
PDP2	0.0273857	0.441726
STK17A	0.0274	0.441305
HCFC2	0.0274143	0.440884
MYH14	0.0274143	0.440236
MYLK3	0.0274143	0.43959
GPER	0.0274286	0.439174
PTPN14	0.0274286	0.438531
DKFZP686L02273	0.0274429	0.438118
DLGAP5	0.0274429	0.437478
ADCY9	0.0274571	0.437068
DCAF10	0.0274714	0.436659
WEE2	0.0274714	0.436024
IL-18	0.0274857	0.435618
FBXO43	0.0274857	0.434986
CLEC6A	0.0275	0.434583
PDPK2P	0.0275	0.433954
EPN3	0.0275143	0.433553
PPM1G	0.0275143	0.432929
KITLG	0.0275857	0.433428
ITSN2	0.0275857	0.432805
POU2F3	0.0275857	0.432184
SIRT1	0.0276	0.431789
VIL1	0.0276143	0.431394
VAV1	0.0276286	0.431001
VEGFC	0.0276857	0.431276
LAMTOR4	0.0277143	0.431106
PTPN18	0.0277286	0.430715
PIK3C3	0.0277429	0.430325
GSG2	0.0277571	0.429935
TPPP	0.0277571	0.429326
CD24	0.0277714	0.42894
SPHK1	0.0278	0.428775
PLCH1	0.0278286	0.42861
SIK2	0.0278429	0.428226
IGF-I	0.0278571	0.427843
GMNC	0.0278571	0.427242
PLA2G4B	0.0278714	0.426862
BST1	0.0279143	0.426919
CDC42BPB	0.0279143	0.426322
MELK	0.0279286	0.425945
TAOK3	0.0279286	0.425351
SLC6A3	0.028	0.425845
SHB	0.028	0.425252
ASPM	0.0280143	0.424878
SIK3	0.0280429	0.424722
PPP1R9B	0.0280429	0.424134
PHLPP1	0.0280571	0.423763
DOCK8	0.0280714	0.423393
CKS2	0.0281143	0.423454
PGF	0.0281857	0.423945
PPP6C	0.0282	0.423577
DUSP15	0.0282429	0.423638
AGRP	0.0282429	0.423057
MAP3K9	0.0283	0.423332
NFKBIA	0.0283143	0.422966
TNS3	0.0283286	0.422602
CRK	0.0283571	0.422451
RGS22	0.0283714	0.422088
RGS12	0.0284143	0.42215
SPDYE4	0.0284286	0.421789
PTPN2	0.0284429	0.421428
FGFR1OP2	0.0284571	0.421068
KCNMA1	0.0284857	0.420921
MARK4	0.0284857	0.420352
HEL-S-96	0.0285	0.419995
MAPK8IP2	0.0285143	0.419639
LAMTOR1	0.0286	0.420334
GRIN2B	0.0286	0.419769
ANAPC16	0.0286143	0.419415
ATPIF1	0.0286286	0.419062
FAM83D	0.0286286	0.418501
RASSF5	0.0286429	0.41815
MAD1L1	0.0286714	0.418008
KIAA1429	0.0286857	0.417659
PELI3	0.0287	0.417311
SPDYE2	0.0287	0.416756
SPHK2	0.0287143	0.41641
SLC9A3	0.0287571	0.416478
DEK	0.0287714	0.416133
NR3C2	0.0287857	0.415789
PPP1R12C	0.0288143	0.415652
FAM200B	0.0288429	0.415515
KIAA0142	0.0289	0.41579
DOK2	0.0289143	0.415448
IGSF5	0.0289286	0.415107
PHLPP2	0.0289286	0.414562
STOX1	0.0289429	0.414223
GATA4	0.0289714	0.414089
JTB	0.0289714	0.413548
CHRM2	0.0290143	0.413619
SPDYE3	0.0290143	0.41308
MLC1	0.0290286	0.412745
MEF2B	0.0290571	0.412614
NFKBIE	0.0290571	0.412078
SPDYE5	0.0290571	0.411544
MAST2	0.0290714	0.411213
SPDYE16	0.0290714	0.410681
TAB3	0.0291	0.410553
SPDYE6	0.0291143	0.410225
ANAPC15	0.0291429	0.410098
DHCR24	0.0291714	0.409972
DNTT	0.0292286	0.410247
DKFZP781N0293	0.0292714	0.410321
GMFB	0.0293286	0.410595
SLC24A1	0.0293429	0.410269
SDCBP	0.0293857	0.410343
CARD14	0.0293857	0.409819
SPDYE1	0.0293857	0.409296
NES	0.0294286	0.409371
FSBP	0.0295	0.409843
RAP1GDS1	0.0295286	0.409718
PIDD1	0.0295571	0.409594
PDPR	0.0295571	0.409075
SPDYC	0.0296	0.40915
VAV2	0.0296143	0.40883
KIDINS220	0.0296143	0.408313
SPDYE2B	0.0296714	0.408585
LAT	0.0296857	0.408267
ADAM17	0.0296857	0.407754
GRIP1	0.0297286	0.407829
SGK2	0.0297429	0.407513
ARL3	0.0298	0.407785
STK16	0.0298	0.407274
VEGFD	0.0298143	0.40696
PPP1R14A	0.0298143	0.406452
SPDYA	0.0298571	0.406529
ZAK	0.0298571	0.406023
MAP3K14	0.0299286	0.406488
SURF6	0.0299429	0.406177
FGF7	0.0299429	0.405673
EPS8L2	0.0299571	0.405363
KIZ	0.0301286	0.407178
DAXX	0.0301286	0.406675
PLCG2	0.0301571	0.406558
UBR1	0.0302	0.406634
RUSC1	0.0302286	0.406517
NEK8	0.0302429	0.406209
PLA2G12B	0.0302714	0.406094
AJUBA	0.0303286	0.406361
MAP4K3	0.0303286	0.405863
NDC80	0.0303429	0.405557
NOX3	0.0303571	0.405252
TRAT1	0.0304143	0.405519
GJD2	0.0304286	0.405215
ARHGEF15	0.0304286	0.404721
SMC4	0.0305143	0.405368
KDR	0.0305429	0.405254
PDE5A	0.0305857	0.40533
MYLK4	0.0306	0.405028
TRPV1	0.0306143	0.404727
STRN	0.0306857	0.40518
NCK2	0.0308286	0.406575
DKFZP781A0677	0.0308429	0.406273
PLCG1	0.0308571	0.405971
TNK2	0.0309143	0.406234
TREX1	0.0309286	0.405933
CLIP3	0.0309429	0.405633
FXYD2	0.0309571	0.405333
APTX	0.031	0.405408
KIFAP3	0.031	0.404924
CABIN1	0.0310429	0.404999
FGF9	0.0310714	0.404888
PFKFB3	0.0310857	0.404591
NEK11	0.0310857	0.40411
CCNG2	0.0311	0.403815
CDK17	0.0311286	0.403706
WDR6	0.0311429	0.403412
FGF17	0.0311857	0.403488
ACIN1	0.0312143	0.40338
CCND3	0.0312571	0.403456
PCID2	0.0313	0.403533
RNF149	0.0313429	0.403609
RNF41	0.0313429	0.403133
RRAGD	0.0313429	0.402659
CAMLG	0.0313571	0.402369
CSE1L	0.0315	0.403728
FGF20	0.0315143	0.403437
DEPTOR	0.0315286	0.403148
COL4A3BP	0.0315429	0.402858
FBXO38	0.0315857	0.402935
GALT	0.0316	0.402646
APLF	0.0316571	0.402904
PPP1R1B	0.0317571	0.403707
E4F1	0.0318143	0.403963
FGR	0.0318143	0.403494
MAP4K5	0.0318286	0.403206
SOS1	0.0318286	0.402739
FGF5	0.0318571	0.402634
FAS	0.0318571	0.402169
RRAGA	0.0318571	0.401704
NLRC3	0.0318714	0.401421
ADCY3	0.0319	0.401318
CARD11	0.0319571	0.401574
PARD6A	0.0319714	0.401292
ANGPT2	0.0320714	0.402085
ZNF318	0.0321286	0.402339
MAP1B	0.0321714	0.402415
ROS1	0.0322143	0.40249
HMGA1	0.0322286	0.402208
STARD10	0.0322714	0.402283
MAPK8IP1	0.0322857	0.402002
BSX	0.0323143	0.4019
PHF23	0.0323714	0.402152
LCK	0.0324	0.40205
TNIP2	0.0324	0.401594
CCNB3	0.0324286	0.401492
PIK3CD	0.0324857	0.401744
SHOC2	0.0325	0.401466
TTC5	0.0325	0.401012
IL1R1	0.0325286	0.400912
MIB1	0.0325429	0.400636
RANGRF	0.0326143	0.401063
TRPM8	0.0326286	0.400787
WWTR1	0.0326286	0.400337
MYDGF	0.0326429	0.400063
SIK1	0.0327714	0.401188
CARM1	0.0327857	0.400914
NKX2-5	0.0328857	0.401687
GRN	0.0329429	0.401935
PPP1R3F	0.0329714	0.401835
GIT1	0.0331143	0.403126
IL2	0.0332286	0.404067
TIAF1	0.0334	0.405699
TTI1	0.0334571	0.405942
JAM2	0.0335	0.406011
NF1	0.0335286	0.405907
TCF7	0.0335571	0.405803
PPP1R3C	0.0335714	0.405526
DOCK3	0.0335714	0.405078
ZNF670	0.0336714	0.405836
FGF6	0.0336857	0.405561
ADRA1A	0.0336857	0.405114
FGF2	0.0337	0.40484
ANGPT1	0.0337571	0.405081
MARS2	0.0338429	0.405664
NTF3	0.0338429	0.405219
ACTR8	0.0338857	0.405288
DDAH2	0.0340143	0.40638
IL6	0.0340571	0.406448
GDNF	0.0341	0.406515
FLNC	0.0342	0.407262
GPNMB	0.0342143	0.406989
MACF1	0.0342286	0.406716
ADSL	0.0342429	0.406443
EHHADH	0.0342571	0.406171
STK40	0.0342571	0.405731
SLC12A5	0.0342714	0.40546
TRPV5	0.0342857	0.40519
GRIA2	0.0343286	0.405258
TTF2	0.0344143	0.405831
L3MBTL3	0.0344286	0.405562
CDC37	0.0344429	0.405293
POLL	0.0346	0.406704
STK11IP	0.0346	0.406266
FLJ00120	0.0346143	0.405997
RAD17	0.0346143	0.405562
DISP3	0.0346571	0.405629
FAF1	0.0346857	0.405528
ADAM15	0.0346857	0.405095
KLRG1	0.0347286	0.405162
STAC	0.0347429	0.404896
NF2	0.0347429	0.404464
MYL6	0.0349	0.405861
ZNF546	0.0349857	0.406425
WWP1	0.0350429	0.406656
SLC8A1	0.0352429	0.408543
PINX1	0.0352714	0.408441
SMC2	0.0353	0.408338
SNCA	0.0353143	0.408071
PSMB8	0.0353286	0.407805
RIPPLY2	0.0353714	0.407869
HES3	0.0354429	0.408261
ADAP1	0.0354571	0.407995
HCK	0.0354857	0.407894
GADD45B	0.0354857	0.407465
ATG14	0.0355	0.407201
SEPT3	0.0355286	0.407101
ATF2	0.0355429	0.406838
KCNK12	0.0356	0.407065
DBF4	0.0356429	0.407129
PAWR	0.0356857	0.407193
DAPP1	0.0357	0.406931
ZNF746	0.0357857	0.407482
HPCA	0.0358429	0.407708
CARD6	0.0359286	0.408257
STK26	0.0359571	0.408157
CISH	0.0359857	0.408058
CFLAR	0.036	0.407796
NFKBIL1	0.0360714	0.408182
STYK1	0.0362857	0.410182
TBC1D1	0.0362857	0.409757
SOCS4	0.0363	0.409495
APC2	0.0363714	0.409878
FAM3C	0.0363857	0.409616
CBLB	0.0364	0.409355
CAMK1G	0.0364429	0.409415
FGF22	0.0364714	0.409315
CDKN2B	0.0364714	0.408895
STAT4	0.0364857	0.408635
PDGFB	0.0365	0.408376
ADAM12	0.0365286	0.408278
KIF14	0.0365429	0.40802
SNX12	0.0366143	0.4084
CSF1	0.0366429	0.408301
PSMD2	0.0367571	0.409157
LAMTOR5	0.0367571	0.408741
SEMA3A	0.0367857	0.408642
FGF8	0.0368286	0.408703
OCLN	0.0368286	0.408288
ULK2	0.0368571	0.40819
NOX1	0.0369	0.408251
ZFP36	0.0369143	0.407995
CIDEC	0.0369429	0.407898
AMOT	0.0369857	0.407959
TCF7L1	0.0370857	0.408649
NHEJ1	0.0371	0.408394
WDR83	0.0371857	0.408926
SH2B2	0.0371857	0.408514
EGR4	0.0372286	0.408574
GRIA3	0.0372429	0.408321
LZTS2	0.0372429	0.407911
CLSPN	0.0372857	0.407971
DSCC1	0.0373	0.407719
CIDEA	0.0374	0.408403
NCF1	0.0375286	0.409398
TELO2	0.0375857	0.409612
CMTM5	0.0376	0.409359
POLM	0.0376429	0.409418
ATP2A1	0.0377286	0.409942
BAD	0.0377429	0.409689
CAMK1D	0.0377714	0.409592
AP2S1	0.0378286	0.409805
PIN1	0.0379	0.410172
JAK2	0.0379429	0.410229
KIF5C	0.038	0.41044
DNAJC27	0.0381429	0.411576
SLN	0.0382286	0.412094
LOC102724428	0.0384	0.413534
AXIN2	0.0384571	0.413741
DDIT4	0.0385286	0.414101
RMDN3	0.0385714	0.414154
CCND2	0.0385857	0.413901
PPT1	0.0386143	0.413801
BDNF	0.0386286	0.413548
BORA	0.0386857	0.413754
CASP3	0.0387	0.413502
TIPIN	0.0387143	0.41325
TDGF1	0.0388571	0.41437
NEFH	0.0388857	0.41427
GFRA4	0.0389	0.414019
MYO6	0.0389714	0.414375
TACC1	0.0389714	0.413972
TFEB	0.0390429	0.414328
ANAPC7	0.0391429	0.414985
ZNF451	0.0392286	0.415491
MS4A2	0.0392429	0.415239
GFRA2	0.0393286	0.415743
NSUN2	0.0393286	0.415341
FRK	0.0393714	0.415392
TXK	0.0394429	0.415744
MYLPF	0.0394857	0.415795
LEF1	0.0394857	0.415394
GRIN1	0.0395	0.415144
SSH1	0.0396714	0.416545
CDC16	0.0396714	0.416145
MYL9	0.0396857	0.415895
HMGCR	0.0398	0.416693
PIK3R3	0.0398857	0.417191
TLR5	0.0399714	0.417687
CHRM3	0.04	0.417586
GFRA3	0.0400286	0.417485
MAP3K11	0.0401143	0.41798
FCER1A	0.0402857	0.419366
MCM10	0.0403	0.419115
ANAPC5	0.0403429	0.419162
PSPN	0.0403571	0.418911
MYL7	0.0403857	0.41881
KCNQ5	0.0404143	0.418709
PTPRG	0.0404143	0.418312
NUMA1	0.0404286	0.418063
MYL10	0.0404571	0.417963
AQP4	0.0405571	0.4186
CBX7	0.0405714	0.418352
ATP1B4	0.0405714	0.417957
MAPKAPK3	0.0406143	0.418005
NOX4	0.0407143	0.418639
ARTN	0.0407286	0.418392
NRG2	0.0407857	0.418585
GFRA1	0.0409143	0.419511
YWHAZ	0.0409143	0.419117
PIK3R5	0.0409286	0.41887
RALGAPB	0.0409429	0.418624
CDC27	0.0409429	0.418233
RAD9B	0.0409571	0.417988
KALRN	0.0409714	0.417743
TCP10L	0.0409714	0.417353
EGLN2	0.0410143	0.417401
ELAVL3	0.0411286	0.418174
DOK6	0.0411429	0.41793
GPBP1L1	0.0411571	0.417687
FGF4	0.0411714	0.417444
RB1CC1	0.0411714	0.417056
CDKN2C	0.0411857	0.416814
EIF2AK3	0.0412143	0.416717
PGAM5	0.0412286	0.416476
AKAP9	0.0412429	0.416235
NRBP1	0.0412857	0.416283
IL1A	0.0413286	0.416331
WDR92	0.0413429	0.416091
FOXL2	0.0413429	0.415708
AIP	0.0413571	0.415469
NRTN	0.0413571	0.415087
PWP1	0.0413714	0.414849
MYL5	0.0414143	0.414898
CTLA4	0.0416286	0.416662
PROS1	0.0417286	0.417281
ARC	0.0418143	0.417755
AKAP5	0.0418429	0.417659
CACNA1S	0.0418857	0.417705
PPP2R3C	0.0418857	0.417324
FXR1	0.0420429	0.418507
EIF2A	0.0420714	0.41841
FGF10	0.0420857	0.418172
AP2B1	0.0421143	0.418075
SH3BP1	0.0421429	0.417979
E2F5	0.0421857	0.418024
ILK	0.0422	0.417787
CEP76	0.0422286	0.417691
NEFM	0.0422429	0.417454
FGFR1	0.0423	0.417641
TP73	0.0423143	0.417404
AIFM2	0.0423571	0.41745
CCNY	0.0423714	0.417214
EML4	0.0424286	0.417401
RHNO1	0.0424571	0.417306
IGHE	0.0425429	0.417772
CKS1B	0.0426	0.417957
CTNND2	0.0426571	0.418142
FRMD1	0.0426857	0.418047
ATP2B4	0.0427714	0.418511
GRIA4	0.0427857	0.418276
MYH11	0.0428143	0.418181
RRAS	0.0429286	0.418923
ABLIM2	0.0430429	0.419663
FRMD6	0.0431	0.419845
PPP2R3A	0.0431143	0.41961
ELK1	0.0431286	0.419375
BARX1	0.0431429	0.419141
RPS6KA6	0.0431714	0.419046
TRIB3	0.0431857	0.418812
MAP3K13	0.0431857	0.418441
CEP192	0.0432429	0.418623
TESK2	0.0432571	0.41839
CHD7	0.0433	0.418434
PPP1R2P3	0.0433286	0.41834
ADAM10	0.0433429	0.418108
MAL	0.0434429	0.418703
CDC42EP3	0.0434571	0.418471
RUNX1	0.0434714	0.41824
TPX2	0.0434857	0.418009
PPP2R3B	0.0435714	0.418465
ZNF579	0.0435857	0.418234
FGFR3	0.0436143	0.418141
CEP131	0.0436714	0.418321
CACNA1D	0.0438286	0.419459
C1ORF168	0.0438286	0.419091
TBXA2R	0.0438429	0.418861
GDF3	0.0438714	0.418768
ORC2	0.0439286	0.418947
HRAS	0.0439857	0.419126
CSNK1A1L	0.0440429	0.419305
LPCAT1	0.0440429	0.418939
TRAF3IP2	0.0440571	0.418711
SPDL1	0.0441143	0.418889
KLHL13	0.0441714	0.419067
PARD6G	0.0441714	0.418703
KLHL9	0.0442286	0.418882
TBC1D4	0.0443	0.419194
ATP1A4	0.0444286	0.420047
MAPKAPK5	0.0444571	0.419954
CARD9	0.0444857	0.41986
NTN1	0.0445143	0.419767
GCK	0.0445429	0.419674
IL2RA	0.0445571	0.419447
PRKAR2B	0.0446429	0.419892
RALGAPA2	0.0446714	0.419799
SPRY2	0.0446857	0.419572
PCK2	0.0447	0.419346
GDF11	0.0447286	0.419253
CRY1	0.0447571	0.419162
GRB2	0.0447857	0.41907
GUCA1A	0.0448714	0.419512
TBC1D14	0.0449143	0.419554
PPP1R1A	0.0449286	0.419328
RAP1GAP2	0.0449429	0.419104
DPYSL4	0.0449429	0.418746
PKN1	0.0451571	0.420384
DPYSL2	0.0451571	0.420026
GET4	0.0452	0.420067
SCN7A	0.0452143	0.419842
FGF1	0.0452714	0.420016
SMEK1	0.0452714	0.419659
PCK1	0.0453143	0.4197
SPSB3	0.0453286	0.419476
ACVR1B	0.0453714	0.419518
PDCL	0.0454714	0.420086
PSMB5	0.0455286	0.420259
POLE2	0.0455429	0.420036
RAPGEF3	0.0455429	0.419681
ARHGAP35	0.0455571	0.419459
PKM2	0.0456286	0.419763
ATP1A2	0.0456286	0.419409
PPP4R3A	0.0456429	0.419188
ATP1A3	0.0456714	0.419098
SH3GL2	0.0456857	0.418877
SNX17	0.0457286	0.418918
RND3	0.0458429	0.419613
GDF10	0.0458857	0.419653
INS	0.0458857	0.419302
GRIN2D	0.0460286	0.420256
RORC	0.0461286	0.420817
CHRNA9	0.0461571	0.420726
SPSB2	0.0461857	0.420636
NOD1	0.0463714	0.421975
NEK4	0.0465143	0.422923
SPSB4	0.0465143	0.422571
MLF2	0.0465714	0.422738
PPP1R16A	0.0466571	0.423165
BRWD1	0.0467571	0.42372
MTBP	0.0468	0.423756
AKAP8	0.0468143	0.423534
CD95	0.0468286	0.423313
GUCY1B2	0.0468286	0.422963
CCDC8	0.0468571	0.422871
IKBKG	0.0468857	0.42278
PRMT2	0.0470143	0.423589
RASGEF1C	0.0470143	0.42324
UNC5C	0.0470143	0.422891
SDCCAG3	0.0470571	0.422928
CRY2	0.0471571	0.423479
CIDEB	0.0471714	0.423259
NEDD4L	0.0472	0.423167
RRAGC	0.0472	0.42282
PPP1R16B	0.0472429	0.422857
CSNK1G2	0.0472857	0.422894
CBLC	0.0473857	0.423442
HEL-176	0.0474286	0.423478
HNRNPAB	0.0474286	0.423132
FKBP8	0.0475143	0.423551
KSR2	0.0475571	0.423587
UNC5B	0.0475571	0.423242
TNFRSF1A	0.0476571	0.423787
ACACA	0.0477143	0.42395
GRB7	0.0479	0.425254
DOCK4	0.0479857	0.425668
SH3BP5	0.048	0.42545
DOK5	0.0480714	0.425737
PNPLA2	0.0480714	0.425392
ZMYM4	0.0481	0.4253
CACNA2D1	0.0481143	0.425082
CACNG1	0.0481571	0.425117
GUK1	0.0482429	0.42553
AP2M1	0.0482857	0.425564
NCF2	0.0483	0.425347
RAPH1	0.0483429	0.425381
MAD2L2	0.0483571	0.425164
EIF4E	0.0483857	0.425073
CACNA2D3	0.0483857	0.424731
DOK1	0.0484429	0.424891
S1PR1	0.0484429	0.42455
ATRIP	0.0484429	0.42421
CACNG5	0.0485143	0.424495
TRPC5	0.0485286	0.42428
CACNA2D4	0.0485714	0.424315
LIME1	0.0486	0.424225
AP2A2	0.0486143	0.424011
JAM3	0.0486714	0.424171
MAPK4	0.0487286	0.42433
IBTK	0.0487857	0.424489
ANKHD1	0.0487857	0.424151
SRPK3	0.0488571	0.424434
PPP4C	0.0488714	0.424221
GYS1	0.0489	0.424132
CACNG6	0.0489	0.423795
CCNF	0.0489	0.423459
ARL6IP4	0.0490286	0.424236
RAD1	0.0490286	0.4239
RAB29	0.0490286	0.423565
CACNG7	0.0490857	0.423723
CDKL3	0.0491	0.423512
ORC4	0.0491429	0.423547
EMD	0.0491429	0.423213
BRINP1	0.0492	0.423371
FABP5	0.0492143	0.42316
ORC5	0.0493429	0.423932
FBXO45	0.0493857	0.423967
NFKBIB	0.0493857	0.423634
NSRP1	0.0493857	0.423301
MYH10	0.0495857	0.424682
SYT4	0.0495857	0.424349
STAT5B	0.0496429	0.424506
PELI1	0.0497	0.424662
ACVR1C	0.0497143	0.424452
UCHL1	0.0497429	0.424364
CDKN2A	0.0498857	0.42525
ATP2A2	0.0499286	0.425284
MYT1	0.0499429	0.425074
ATF1	0.0500286	0.425472
PELI2	0.0500857	0.425626
STAU1	0.0501	0.425417
FES	0.0501143	0.425207
TRIB1	0.0501286	0.424998
CACNB2	0.0501714	0.425032
BMPR1A	0.0502857	0.425669
XRCC4	0.0503143	0.425581
SGO1	0.0503714	0.425735
NMDAR2C	0.0504429	0.426009
BCL2L11	0.0504429	0.42568
MEF2D	0.0504571	0.425472
PTPN13	0.0504571	0.425143
DPYSL3	0.0504714	0.424936
LRIG1	0.0505429	0.425209
CACNB1	0.0505857	0.425242
ITCH	0.0506857	0.425755
KIF20A	0.0507429	0.425907
ALOX5	0.0508286	0.426299
GUSBP1	0.0508714	0.426331
GDF2	0.0508857	0.426124
TRIP6	0.0509	0.425917
NFE2L2	0.051	0.426427
CDC42EP5	0.0510286	0.426339
BMP15	0.0510286	0.426013
PRKAR1B	0.0512857	0.427833
MKI67	0.0513	0.427626
ROBO2	0.0513857	0.428013
MAPK8IP3	0.0515429	0.428995
STIP1	0.0516429	0.4295
RNF126	0.0517143	0.429767
BMP10	0.0517286	0.429559
CYBB	0.0517286	0.429232
PLIN1	0.0518143	0.429617
PDGFA	0.052	0.43083
DNAJA2	0.0520857	0.431213
RASGEF1A	0.0521143	0.431122
RALB	0.0521286	0.430914
BSN	0.0521429	0.430706
CACNB4	0.0521571	0.430498
TLR3	0.0521857	0.430409
KANK2	0.0522	0.430202
RAP1B	0.0522286	0.430113
CDC42BPA	0.0522429	0.429906
BEX1	0.0522857	0.429935
SARM1	0.0523143	0.429846
KIF5B	0.0525143	0.431165
RSU1	0.0525143	0.430841
PFN1	0.0526857	0.431923
SLC20A1	0.0527714	0.432301
NHLH2	0.0528143	0.432328
CACNB3	0.0528429	0.432238
GNG11	0.0528429	0.431914
SEPP1	0.0528571	0.431708
FUT4	0.0529143	0.431851
GYS2	0.0529429	0.431762
CPEB3	0.053	0.431905
TLR10	0.0530143	0.4317
CARHSP1	0.0530571	0.431727
SRF	0.0531	0.431754
TAX1BP1	0.0531857	0.432129
NOS3	0.0532571	0.432388
WIZ	0.0532714	0.432182
TSC22D4	0.0534286	0.433135
PSMD5	0.0534429	0.43293
GDF15	0.0534857	0.432956
TDRD7	0.0535286	0.432982
IL12A	0.0537429	0.434393
CACNA2D2	0.0538714	0.43511
NEK1	0.0539	0.435019
ABLIM1	0.0539	0.434698
PSMF1	0.0540286	0.435413
VSX1	0.0541143	0.435783
ZDHHC17	0.0541143	0.435461
CDC26	0.0543143	0.436749
EIF2S3L	0.0543857	0.437002
CHKB	0.0544	0.436795
NCOA3	0.0544143	0.436589
FKBP1A	0.0544286	0.436383
RAP1A	0.0544571	0.436291
PTPN1	0.0545857	0.437001
CDK10	0.0547286	0.437823
MICAL1	0.0547429	0.437617
KLHL21	0.0548	0.437754
PSME1	0.0548571	0.43789
MOAP1	0.0548857	0.437798
ATAD3A	0.0549143	0.437706
FGF3	0.0550286	0.438297
LIMD1	0.0550714	0.438319
GGCX	0.0551286	0.438454
KIF26B	0.0551429	0.438248
IL23A	0.0551714	0.438156
DST	0.0551857	0.437951
BRAP	0.0552429	0.438086
SESN2	0.0552714	0.437995
TLK2	0.0553286	0.43813
PPP4R1L	0.0553714	0.438151
ITPR1	0.0553857	0.437947
SAFB	0.0553857	0.43763
CNN3	0.0554143	0.437539
NRK	0.0554286	0.437336
DOK4	0.0554429	0.437133
FLNA	0.0554571	0.43693
IQSEC1	0.0555714	0.437515
NRG4	0.0555857	0.437312
RANBP10	0.0555857	0.436997
SFN	0.0555857	0.436683
PDE2A	0.0556	0.436481
CHKA	0.0558143	0.437848
PSME2	0.0558429	0.437758
PPP2R4	0.0559	0.437892
FGF23	0.0559286	0.437801
ANAPC10	0.0559571	0.437711
TNPO1	0.0559571	0.437398
ZNF282	0.056	0.43742
MTDH	0.056	0.437107
RASGRF1	0.0560571	0.437241
PPARGC1A	0.0560714	0.43704
IL2RB	0.0562143	0.437841
CAPG	0.0562571	0.437862
USP18	0.0563143	0.437995
GADD45A	0.0565286	0.439349
EPB41L1	0.0566143	0.439702
FZD5	0.0566286	0.4395
ABI1	0.0566571	0.43941
PLN	0.0568429	0.440537
EGLN3	0.0568571	0.440335
CD209	0.0569286	0.440576
RIOK1	0.0569286	0.440264
PNKP	0.0571571	0.441719
RCAN2	0.0571714	0.441517
PLEKHO1	0.0572	0.441425
ATP1A1	0.0573429	0.442215
STXBP3	0.0573714	0.442123
H3F3C	0.0573857	0.441922
PSMB4	0.0574571	0.44216
MDFIC	0.0574714	0.441958
PPP1R14C	0.0575571	0.442306
CAPZA3	0.0576286	0.442543
CACNA1C	0.0576286	0.442232
ILKAP	0.0576571	0.442141
CRMP1	0.0576714	0.44194
FAM58A	0.0576714	0.44163
PSMB6	0.0576714	0.441321
TLE1	0.0577143	0.441339
ZNF622	0.0578714	0.442231
CLNK	0.0579143	0.442249
BMX	0.0580286	0.442812
ERRFI1	0.0581429	0.443375
CNTNAP1	0.0581714	0.443283
ZNF420	0.0583143	0.444062
DDR2	0.0584857	0.445057
L1CAM	0.0587	0.446376
BIRC6	0.0587571	0.4465
ITPR2	0.0588	0.446515
TRIL	0.0588571	0.446638
BLM	0.0588714	0.446436
CDC20B	0.0589714	0.446884
FCERI	0.0590286	0.447007
CEP164	0.0591143	0.447346
HHIPL2	0.0591286	0.447144
CACNA1F	0.0593571	0.448562
NDE1	0.0593571	0.448252
ZCCHC9	0.0594286	0.448481
TOP3A	0.0595	0.44871
FYCO1	0.0596286	0.44937
KCNJ8	0.0596714	0.449382
ADIPOQ	0.0598857	0.450685
RGS1	0.0598857	0.450375
LLGL2	0.0599286	0.450387
FAM175A	0.0600143	0.450721
GRIP2	0.0601143	0.451162
CPNE1	0.0601714	0.45128
PSMB11	0.0602714	0.45172
IL12B	0.0604571	0.452801
RAPGEF4	0.0604571	0.452491
STAT5A	0.0605143	0.452608
CEP97	0.0605714	0.452726
CDK14	0.0608286	0.454337
F11R	0.0609714	0.455092
RASIP1	0.0610143	0.455101
TIMELESS	0.0610429	0.455004
KCNQ3	0.0610571	0.4548
MCM8	0.0610857	0.454702
CAST	0.0611571	0.454924
UCP3	0.0611571	0.454614
UBA52	0.0612	0.454623
GDF5	0.0612714	0.454844
PHEX	0.0613	0.454747
BMP8A	0.0613429	0.454756
FZD1	0.0613714	0.45466
SGO2	0.0613857	0.454457
BCAR1	0.0614143	0.454361
UIMC1	0.0614429	0.454264
HOXC6	0.0614571	0.454062
RGL4	0.0615286	0.454283
ZAP70	0.0615571	0.454187
KLB	0.0616	0.454196
TEP1	0.0616	0.453889
C19ORF12	0.0616286	0.453794
NIPBL	0.0616571	0.453698
CDKN1C	0.0616571	0.453393
GAS2L3	0.0617143	0.453508
CYS1	0.0617714	0.453622
CD72	0.0619286	0.454471
PLEKHA1	0.0619714	0.45448
PDLIM1	0.062	0.454384
SPIB	0.0620857	0.454707
RP2	0.0620857	0.454402
IL2RG	0.0621143	0.454307
CDKN1A	0.0621143	0.454003
CDCA5	0.0621286	0.453803
CALM1	0.0621857	0.453917
ODAM	0.0622429	0.454031
GDF6	0.0622857	0.45404
GRIN3B	0.0623286	0.454049
MYO1D	0.0623571	0.453955
GDF9	0.0623857	0.45386
CDC23	0.0624	0.453662
TEX15	0.0624429	0.453671
SCN5A	0.0624429	0.45337
BTN2A1	0.0625143	0.453587
DHRS2	0.0626	0.453907
TUBGCP5	0.0626429	0.453916
SCRIB	0.0626714	0.453822
TUBG2	0.0627571	0.454142
NEFL	0.0627714	0.453944
CDH2	0.0628571	0.454263
RORA	0.0630429	0.455304
IGBP1	0.0630571	0.455106
PLEKHA2	0.0630571	0.454806
CNPPD1	0.0631	0.454815
BCCIP	0.0631143	0.454617
CASP2	0.0631143	0.454318
KNTC1	0.0631286	0.454121
TUBGCP4	0.0632143	0.454438
PPP4R3B	0.0632143	0.454139
FGFR2	0.0635	0.455892
SLC7A5	0.0635429	0.4559
TUBGCP6	0.0635714	0.455806
TRPC6	0.0635857	0.455609
MIS12	0.0637857	0.456742
SPC24	0.0639	0.457261
SKA1	0.0639429	0.457268
FASLG	0.0640429	0.457683
ERCC6L	0.0640857	0.45769
SKA2	0.0643	0.45892
ATP2A3	0.0643571	0.459028
DKFZP451O0517	0.0643857	0.458932
ZWILCH	0.0644143	0.458836
SKAP1	0.0645286	0.459351
MCC	0.0645571	0.459255
NSL1	0.0646	0.45926
NFAM1	0.0647714	0.460179
PSMD6	0.0649429	0.461097
CAPNS2	0.0649714	0.461
DSN1	0.065	0.460904
PDYN	0.0650143	0.460706
TGFBR1	0.0650714	0.460812
ZNF174	0.0651857	0.461322
WHSC1L1	0.0652714	0.461629
ORC6	0.0653	0.461533
KCNK3	0.0653143	0.461335
ANAPC1	0.0654143	0.461743
GLIS2	0.0654143	0.461444
CAPN2	0.0654286	0.461247
LPAR3	0.0654857	0.461352
YWHAE	0.0655143	0.461256
UBR5	0.0656286	0.461763
KIT	0.0656571	0.461666
MCM9	0.0659571	0.463477
PSME4	0.0659571	0.463179
PTPRK	0.0659857	0.463082
DOCK7	0.0660571	0.463286
CDC42SE1	0.0661286	0.463489
BTK	0.0661714	0.463492
NDN	0.0662	0.463395
PTPN11	0.0662	0.463098
NGF	0.0662571	0.463201
CABP4	0.0663	0.463204
NOP2	0.0663	0.462908
GMNN	0.0663571	0.463011
RANBP9	0.0664571	0.463412
SH3BP2	0.0665143	0.463515
ORC3	0.0665571	0.463518
HTATSF1	0.0667143	0.464316
DVL1P1	0.0669	0.465312
PSMB9	0.0669571	0.465413
MUSK	0.0670429	0.465712
POLE3	0.0670571	0.465515
DKFZP779O2152	0.0671714	0.466012
SH3GLB1	0.0672714	0.46641
DMPK	0.0672714	0.466114
BMPR1B	0.0673143	0.466115
IFNAR1	0.0674571	0.466808
PKIA	0.0674571	0.466513
PDE1C	0.0675	0.466514
UGCG	0.0675143	0.466317
YWHAB	0.0676857	0.467206
ZDHHC21	0.0677571	0.467403
NECTIN4	0.0677571	0.467108
DOCK2	0.0679857	0.468388
TNIK	0.0681714	0.469372
SMC3	0.0682714	0.469764
ECE2	0.0684286	0.470549
DFFA	0.0684714	0.470547
MND1	0.0685	0.470447
GPX1	0.0685429	0.470446
LYPLA1	0.0686857	0.47113
CPE	0.0686857	0.470834
CYLD	0.0689	0.472007
AAK1	0.0689	0.471711
SSRP1	0.0689857	0.472002
ASIP	0.0690429	0.472097
FZD2	0.0690429	0.471802
NOSIP	0.0690857	0.471799
CLASP2	0.0691	0.471602
CIT	0.0693429	0.472964
PXN	0.0693857	0.472961
SPC25	0.0695571	0.473834
LAD1	0.0696	0.47383
TBKBP1	0.0696286	0.473729
SCN1B	0.0697286	0.474114
GDF7	0.0697571	0.474013
ANAPC2	0.0698143	0.474106
BANF1	0.0699143	0.47449
PTP4A1	0.0699429	0.47439
PEAK1	0.0699714	0.474289
HIPK1	0.07	0.474188
SEPT2	0.0701	0.474571
MASTL	0.0702	0.474954
IL1B	0.0702286	0.474853
EDIL3	0.0702571	0.474752
RAG1	0.0702714	0.474555
CKAP5	0.0703	0.474454
PSMD11	0.0703	0.474161
PSMA7	0.0703714	0.47435
ANAPC4	0.0703714	0.474057
LPAR1	0.0704857	0.474535
SMAD6	0.0706429	0.475299
NCK1	0.0707	0.475391
SHTN1	0.0707	0.475098
DCHS2	0.0707143	0.474902
DCLRE1C	0.0707286	0.474706
IGHMBP2	0.0707857	0.474798
LIG4	0.0708714	0.475081
ZNF596	0.0709571	0.475364
RALGDS	0.0710429	0.475646
IL6R	0.0713143	0.477171
KL	0.0713429	0.47707
PYGB	0.0715286	0.478019
AIM2	0.0716714	0.478681
HSP90AB1	0.0718143	0.479342
ABHD5	0.0718429	0.479239
GRB10	0.0718571	0.479042
DPYSL5	0.0719429	0.479321
UNC5D	0.0719571	0.479124
CILP	0.0719571	0.478832
ACACB	0.0720286	0.479015
NPHP4	0.0720429	0.478819
TRPV2	0.0720571	0.478622
PTPRU	0.0721	0.478616
SCN2B	0.0721143	0.47842
ELMO1	0.0721714	0.478508
IER3	0.0722286	0.478596
AHCTF1	0.0722429	0.478401
PFN3	0.0722429	0.478111
TICAM2	0.0722857	0.478105
SLC38A9	0.0723143	0.478004
MDH1	0.0723286	0.477809
MATK	0.0723429	0.477615
POP3	0.0724	0.477703
PSMD10	0.0724286	0.477603
ATAD2	0.0725286	0.477974
SOCS2	0.0727286	0.479003
BCKDHB	0.0727286	0.478714
FLNB	0.0727714	0.478708
SOD2	0.0727714	0.478419
PTK2B	0.0727714	0.478132
PSME3	0.0730429	0.479626
HNF1A	0.0730571	0.479432
BCKDHA	0.0730714	0.479238
SQSTM1	0.0733429	0.480729
PFKM	0.0733714	0.480628
EGF	0.0733857	0.480433
FLJ00404	0.0734	0.480239
FASTKD5	0.0734	0.479951
PTPRZ1	0.0734714	0.480131
FARP2	0.0735	0.48003
XPO6	0.0735857	0.480303
RANBP17	0.0736	0.480109
IL18	0.0736714	0.480288
CAV2	0.0737	0.480188
KLHL3	0.0738	0.480553
PDIA6	0.0738143	0.480359
PTPN4	0.0739	0.480631
ATP1B3	0.0739	0.480344
PHKA2	0.0739286	0.480244
GJA1	0.0739286	0.479959
TNFRSF10A	0.0740857	0.480693
JAK3	0.0741714	0.480964
MALT1	0.0742429	0.481141
RCC2	0.0743143	0.481318
PILRA	0.0743286	0.481125
TRADD	0.0745143	0.482042
HUS1	0.0745429	0.481941
CEP57	0.0745857	0.481933
LNPEP	0.0745857	0.481648
SHFM1	0.0746286	0.48164
ORC1	0.0746714	0.481632
CRTC2	0.0746857	0.48144
PITRM1	0.0747	0.481248
RAI1	0.0747	0.480964
CD40LG	0.0748143	0.481416
DUSP22	0.0749286	0.481867
EIF4EBP2	0.0749857	0.481951
ATP1B1	0.0750714	0.482218
TRIM24	0.0750714	0.481934
NFATC1	0.0751143	0.481926
MSH4	0.0751286	0.481735
CAMKMT	0.0751286	0.481452
ZRANB2	0.0752143	0.481719
AKAP10	0.0753286	0.482168
AKAP17A	0.0755	0.482982
PSMD8	0.0758	0.484617
IL18BP	0.0759714	0.485429
GIGYF2	0.076	0.485328
PTPN12	0.0761571	0.486047
PYGM	0.0761857	0.485945
PDLIM7	0.0762143	0.485844
BTRC	0.0762143	0.48556
IQGAP3	0.0764857	0.487005
RFX6	0.0765	0.486813
GRAP2	0.0766429	0.487438
AZI2	0.0766857	0.487426
ZBP1	0.0767	0.487233
ZFYVE28	0.0767143	0.487041
CD5L	0.0767857	0.487211
MDK	0.0768	0.487019
DPYS	0.0768429	0.487008
ARPP19	0.0768571	0.486816
PTPRJ	0.0768714	0.486624
ENSA	0.0769	0.486523
ANP32C	0.0771286	0.487686
LRRK1	0.0771571	0.487585
MSH5	0.0772429	0.487844
MCM2	0.0773857	0.488464
LIPT1	0.0774	0.488272
PRKRA	0.0774714	0.48844
MYL6B	0.0775571	0.488698
PRMT5	0.0776	0.488686
PPP5C	0.0776286	0.488585
AAMDC	0.0776714	0.488573
GRIN2A	0.0776714	0.488291
B9D2	0.0779571	0.489806
MSTN	0.0780571	0.490152
NR2C2AP	0.0782143	0.490856
LEPR	0.0782571	0.490843
TNFR1B	0.0783	0.49083
WDPCP	0.0783	0.490549
SIPA1L2	0.0783857	0.490804
SMARCAL1	0.0784	0.490612
SEPT11	0.0784714	0.490778
PTPRA	0.0784714	0.490497
NR2A2	0.0785571	0.490752
TNFRSF4	0.0786429	0.491006
G6B	0.0786857	0.490993
STK35	0.0787143	0.490891
NPRL3	0.0787286	0.4907
TMEM67	0.0788143	0.490954
BMP5	0.0789286	0.491385
NPRL2	0.0790143	0.491639
PPM1B	0.0790857	0.491803
PIK3R1	0.0791	0.491612
RACK1	0.0791429	0.491598
NR4A1	0.0792	0.491674
CENPF	0.0792714	0.491837
SKAP2	0.0793	0.491735
TCTN1	0.0795	0.492696
CXCL8	0.0795286	0.492593
TNFSF4	0.0795286	0.492314
SOCS3	0.0796286	0.492654
PLCB4	0.0796286	0.492375
TCTN2	0.0796857	0.492449
GSX1	0.0797	0.492259
ITPR3	0.0797571	0.492333
MYBL2	0.0798429	0.492584
SPAG9	0.0799286	0.492834
PTPRF	0.0799571	0.492732
IL1RAP	0.0800143	0.492806
PLCB1	0.0800286	0.492617
AMER1	0.0801143	0.492866
RPA4	0.0801571	0.492852
S100A7	0.0802571	0.49319
CDC14A	0.0804	0.49379
NBN	0.0805857	0.494652
CHRDL1	0.0806571	0.494812
INSM2	0.0806714	0.494622
CDC42EP1	0.0807286	0.494695
TOLLIP	0.0807429	0.494505
PIK3R4	0.0808571	0.494927
PLCB2	0.0808714	0.494737
BCL10	0.0809	0.494635
CEP63	0.0809571	0.494707
MPRIP	0.0809571	0.49443
LRRC4B	0.0810286	0.49459
TCTN3	0.0811	0.49475
SORL1	0.0811286	0.494648
SOCS5	0.0811714	0.494633
GNG10	0.0811857	0.494444
PSMD12	0.0812	0.494255
IRF3	0.0812857	0.494501
CTBP1	0.0813143	0.4944
CAMKV	0.0813286	0.494211
CORO1C	0.0813571	0.49411
GDF1	0.0813714	0.493922
CCP110	0.0814143	0.493908
FADD	0.0814286	0.49372
PRPH	0.0814857	0.493792
CNTRL	0.0816286	0.494384
TUBGCP2	0.0816429	0.494196
SHD	0.0816429	0.493922
PYGL	0.0816571	0.493735
CEP78	0.0816571	0.493462
AP2A1	0.0816571	0.493189
KTN1	0.0817857	0.493692
HSF1	0.0818857	0.494023
PPYR1	0.0818857	0.49375
YWHAH	0.0819429	0.493822
SSNA1	0.082	0.493894
TMOD3	0.082	0.493622
ALMS1	0.0820143	0.493436
RIT1	0.0820857	0.493593
EGLN1	0.0821714	0.493837
PINK1	0.0822	0.493737
VEGFR1	0.0822	0.493465
SCLT1	0.0822571	0.493537
CEP83	0.0822857	0.493437
BMP3	0.0823	0.493252
KIF24	0.0823286	0.493153
PSMC3IP	0.0825143	0.493994
FBF1	0.0825286	0.493809
ODF2	0.0825286	0.493539
SDCCAG8	0.0826429	0.493952
CORO2A	0.0828286	0.494791
HAUS4	0.0828429	0.494606
NEDD9	0.0828571	0.49442
NAV1	0.0828571	0.49415
SFI1	0.0829	0.494136
UBE2V1	0.0829429	0.494122
POLA1	0.083	0.494193
ASB16	0.0830143	0.494008
RIPK1	0.0830286	0.493824
NRP1	0.0830857	0.493895
HAUS2	0.0830857	0.493626
PHIP	0.0831	0.493443
RAG2	0.0831143	0.493259
DBT	0.0832143	0.493585
HMMR	0.0832571	0.493571
RPS27A	0.0833	0.493557
C2CD3	0.0833143	0.493374
TUBGCP3	0.0833571	0.49336
CEP162	0.0834	0.493346
CEP89	0.0835857	0.494177
HAUS7	0.0835857	0.49391
PRPS1	0.0836	0.493727
ASF1A	0.0836429	0.493713
MCM4	0.0836714	0.493615
NDEL1	0.0836714	0.493348
HSD17B2	0.0837571	0.493587
PSMD3	0.0838571	0.49391
S1PR3	0.0839	0.493896
HAUS6	0.0839143	0.493714
CEP41	0.0840286	0.49412
HAUS3	0.0841571	0.49461
CDC20	0.0841857	0.494512
HAUS8	0.0842	0.49433
CHN1	0.0842	0.494064
WNT1	0.0842	0.493799
LEFTY1	0.0842143	0.493617
PTGES3	0.0842714	0.493687
NFE4	0.0843571	0.493925
NINL	0.0843714	0.493743
CEP70	0.0843857	0.493563
BLNK	0.0844714	0.493799
IFI16	0.0845143	0.493786
BUB3	0.0845571	0.493772
POLN	0.0846714	0.494175
CCDC6	0.0847	0.494078
STK24	0.0847714	0.49423
CEP250	0.0847857	0.49405
ZNF2	0.0848286	0.494036
MAD2L1	0.0849857	0.494687
ATP1B2	0.0851714	0.495504
IPCEF1	0.0852571	0.495739
LEFTY2	0.0853429	0.495973
CRADD	0.0853857	0.495958
DDX41	0.0854143	0.49586
WRN	0.0854286	0.49568
CDC42EP2	0.0854429	0.495499
CARD8	0.0854571	0.495319
DVL3	0.0856429	0.496132
PLCB3	0.0856571	0.495952
GPATCH1	0.0857429	0.496185
DEPDC5	0.0859571	0.497162
ICOSLG	0.0859714	0.496981
NBR1	0.0859857	0.496801
PSMB7	0.0860429	0.496868
TFB2M	0.0863143	0.498172
V1-7	0.0863286	0.497991
ENAH	0.0864714	0.498552
RIC8A	0.0864857	0.498371
PSMB10	0.0865	0.49819
V2-17	0.0865429	0.498174
V5-1	0.0865571	0.497994
SSH3	0.0866429	0.498225
V4-1	0.0866714	0.498127
FEZ2	0.0867429	0.498275
HGS	0.0867571	0.498095
NKAP	0.0867571	0.497833
V3-4	0.0868	0.497818
TRPC3	0.0868286	0.49772
V3-3	0.0868429	0.497541
SPARCL1	0.0868429	0.49728
V1-5	0.0868857	0.497265
PTPN3	0.0869143	0.497168
FLJ00308	0.0869429	0.497071
CYP11B2	0.0869571	0.496892
CCNG1	0.0869571	0.496632
V1-13	0.0869571	0.496373
BNIP2	0.087	0.496358
PARD6B	0.087	0.496099
V4-6	0.087	0.49584
V1-11	0.0870286	0.495744
V2-8	0.0870571	0.495648
V5-4	0.0871143	0.495715
V1-20	0.0871429	0.495619
V1-9	0.0871429	0.495361
V2-19	0.0871714	0.495266
APPL1	0.0871714	0.495008
V5-6	0.0872429	0.495156
SSH2	0.0872714	0.495061
PSMD13	0.0873714	0.495371
NEDD1	0.0874286	0.495438
V1-16	0.0875429	0.495828
V2-11	0.0875571	0.495652
V3-2	0.0876143	0.495719
AHI1	0.0876571	0.495704
NTMT1	0.0876571	0.495448
NFATC2	0.0876714	0.495272
PGR	0.0878	0.495742
V4-2	0.0878	0.495486
BNIPL	0.0879143	0.495874
ASF1B	0.0879286	0.495699
CCNC	0.0879857	0.495765
USP8	0.0880286	0.495751
V2-15	0.0881714	0.496299
DTHD1	0.0882143	0.496285
V1-3	0.0882857	0.496431
USP44	0.0885	0.49738
NPAS4	0.0885143	0.497204
TLR8	0.0885429	0.497109
WFS1	0.0887	0.497735
GRIN2C	0.0887571	0.4978
PLXNA4	0.0887714	0.497625
PLXNA3	0.0889143	0.49817
PSMD4	0.0889429	0.498074
SLC9A1	0.0889429	0.497819
PECAM1	0.0890143	0.497963
PTPRN	0.0890429	0.497868
PIK3R6	0.0890571	0.497693
LPXN	0.0891286	0.497838
BASH	0.0891714	0.497822
LY96	0.0893429	0.498525
SNX19	0.0893714	0.498429
ZWINT	0.0893714	0.498175
EPS15L1	0.0895	0.498637
KIAA1149	0.0895286	0.498542
PRDX1	0.0896	0.498685
RRAS2	0.0896286	0.49859
TMEM173	0.0897	0.498734
ARR3	0.0898143	0.499115
BABAM1	0.0898429	0.49902
MRAS	0.0899	0.499083
PPM1K	0.0899286	0.498988
TNFRSF1B	0.0900286	0.499289
HAUS5	0.0901571	0.499749
TNF	0.0902	0.499732
SRPK2	0.0902143	0.499558
PLA2G3	0.0902143	0.499305
PRDX5	0.0902571	0.499289
MITF	0.0903286	0.499431
BRCC3	0.0903286	0.499178
CEP55	0.0903571	0.499084
FGFR1OP	0.0904	0.499068
PRPS1L1	0.0905143	0.499446
CRB1	0.0906143	0.499746
PRIM1	0.0906286	0.499572
OSTF1	0.0906286	0.49932
DONSON	0.0906286	0.499068
NIP7	0.0906571	0.498974
NYAP1	0.0906857	0.49888
S100A12	0.0907286	0.498864
PTPRB	0.0908143	0.499084
NYAP2	0.0908571	0.499069
XPNPEP1	0.0909	0.499053
THAP1	0.0909429	0.499037
MAD2L1BP	0.0909571	0.498865
PLA2G5	0.0910143	0.498928
PLA2G2D	0.0911143	0.499226
PRIM2	0.0911857	0.499366
PLA2G12A	0.0912714	0.499585
PLA2G2F	0.0913429	0.499726
ASS1	0.0913571	0.499554
PRNP	0.0914143	0.499616
NMRAL1	0.0914286	0.499444
[truncated: 10,070 more rows]
