# Supplementary material for: Oncogenic PKA signaling increases c-MYC protein expression through multiple targetable mechanisms
Source: eLife. 2023 Jan 24;12:e69521. doi: 10.7554/eLife.69521 (PMC9925115; doi:10.7554/eLife.69521)
Supplement: Supplementary file 4. [file elife-69521-supp4.xlsx]

## Sheet: Sheet1
	log2FoldChange	padj
PRKACA	-2.41199	209.66
ADH1C	3.45637	190.474
SLC7A5	-2.07122	187.719
DUSP1	-1.94398	180.449
IGFBP1	-2.22399	171.062
ODC1	-1.95923	152.222
CEMIP	-2.42678	148.188
PCSK1	-1.97444	132.946
UNC13A	-2.87318	121.597
C4A	4.23391	118.755
RPS27L	2.05511	116.1
SDCBP2	-2.1937	111.261
FN1	1.85566	110.864
SERPINA6	2.35764	108.045
LCN2	1.37755	106.712
FA2H	-1.61315	106.514
BASP1	-1.59998	103.243
TNFSF14	2.92469	99.3666
MAFK	-1.61441	98.4629
NR4A1	-1.9411	97.8928
FOXL1	-1.57678	96.4012
C3	1.66923	93.1095
CRP	2.19366	92.0577
TFPI2	2.51239	85.2837
IRS2	-2.05656	83.2972
OAT	-1.47403	82.9037
PDZK1IP1	1.43278	82.5129
CHST4	2.06662	82.0966
GPRC5B	1.73831	81.4058
CCNG1	1.65961	81.1935
FST	-1.28553	80.8824
CH507-42P11.8	-1.62321	79.6465
RP11-432M8.8	-2.97606	78.7338
FOS	-1.64678	77.8148
LRG1	2.20718	74.0814
AKAP12	-1.77282	73.4578
FZD10	-2.08742	69.2014
SCARA5	-1.19215	68.9711
VNN1	1.33885	68.3466
PCK1	-2.17528	67.8776
CXCL16	-1.18148	66.9198
ETS2	-1.41541	64.4575
KRT7	-1.04766	64.142
TNFAIP2	1.1243	63.7034
RASD1	-1.55061	62.4625
CD55	-1.09686	60.4892
RHOF	-1.37651	59.5106
FSTL3	-1.24967	58.6971
SOCS3	-1.5744	57.2581
F3	-1.36168	56.7667
SMOC1	-1.31484	56.0164
CPLX2	-1.27074	54.367
CFB	1.81648	53.8126
FAM83A	-1.53348	53.3149
PFKP	-1.04014	52.5425
CYP1B1	1.25127	52.454
CXCL6	2.35996	51.7864
STC1	-1.97384	51.5775
C4B	4.1674	51.3154
CFH	1.38224	50.4665
AREG	-1.5103	50.135
SLC26A9	-1.39607	49.9984
TFF1	-1.21855	49.5614
PLEC	-0.953221	49.2583
NID2	-1.13844	49.2022
GSTA2	2.21269	49.1591
GDF15	-1.51786	49.0677
B4GALT1	-1.06786	48.9988
RND1	-1.58375	48.5095
POLR2C	-1.08756	48.5059
TNFRSF1B	-1.27702	48.3167
C1S	1.5088	48.2236
MBNL1	1.65115	47.9855
TESC	-1.36779	47.4984
DPCR1	-1.62899	47.455
FGG	1.44734	47.2025
KRT80	-1.08765	45.9758
ADAMTS10	1.44232	45.9253
ADGRG1	-1.39426	45.4039
GPRC5A	-1.32509	44.9535
INSL4	-1.70857	44.9515
BMP6	-2.3295	44.9474
CCND1	-1.01764	44.9039
MISP	-0.999916	44.7737
AGT	1.03538	44.0779
RARRES1	2.50023	43.8439
CP	1.10813	43.6813
S100P	-1.01133	43.6195
NRP1	1.14638	43.5013
C4BPA	2.76045	42.7428
SLC25A25-AS1	1.76599	41.7811
ISG20	-1.88479	41.7611
IGFBP3	-0.868819	41.6211
CPS1	-1.03053	41.4448
TNRC6C	-1.57961	40.2674
CFI	4.2636	40.0691
SLC6A14	-1.26756	39.9194
SLC12A7	-0.90873	39.3233
LBP	3.98029	38.6827
SAMD11	-1.19837	38.3858
TM4SF1	-0.96103	38.082
GPR153	-1.08286	37.8002
FER1L6	-1.73679	37.704
SPP1	1.42174	36.1243
CAV1	1.47069	35.9078
PMP22	-1.29555	35.8224
RBFOX3	-1.42885	35.6889
SIK1	-1.75868	35.5196
S100A16	-0.984343	35.3776
SLC7A1	-1.09555	35.3122
KLHDC7A	1.80682	34.7752
RHOB	-0.873775	34.3759
PYGB	-0.803219	34.3648
UGT1A1	-0.865783	34.1117
BDNF	-1.72351	33.9412
APOL6	1.68661	33.8117
RP11-397G17.1	1.6954	33.2982
OSBP2	-1.4641	33.1755
AQP3	-1.3604	33.1021
RAB10	-0.870247	32.711
CASP9	-1.65943	31.9355
ALDH3B1	-0.938279	31.2736
SMOX	-0.926337	31.2736
PLAUR	-1.26145	30.9737
MLKL	-1.1069	30.9434
USH1C	-0.986279	30.7477
ACOT7	-1.15444	30.5214
SOD2	0.998827	30.5019
CEACAM6	-0.7648	30.1765
GC	2.28601	30.1661
SERPINE1	-1.57002	29.9204
ICAM1	1.40951	29.5361
ADCY5	1.93773	29.3387
C1R	1.68506	29.2444
PBXIP1	0.915165	29.1649
BMP2	-0.753804	28.7703
PITX1	-0.989536	28.7126
PLCXD3	4.54942	28.4089
TMEM184A	-1.15489	28.3094
MIDN	-0.83467	27.4935
URB1	-1.06878	27.3346
RDH10	-0.880932	27.003
NFKBIZ	1.07923	26.8681
APOL1	0.925488	26.6787
GCH1	-0.885301	26.6567
TXNIP	2.10378	26.5349
MYLK	1.88849	26.5185
LGALS9	0.988583	26.4369
CREB3L1	-1.07221	26.3528
GSTA1	0.964883	25.8333
FAM46A	-0.955785	25.8032
DACT2	-1.13763	25.3962
MUC13	-0.745609	25.2982
CSF1	1.44281	25.2024
TUBA4A	-0.895876	25.1418
FSTL4	-1.81922	24.6253
AGR2	-0.685953	24.5507
APCS	1.40145	24.4658
HABP2	2.59563	24.0793
HSD17B2	-0.833306	24.0784
GSN	1.2132	23.9091
CNTD2	-2.12128	23.6792
PLA2G4A	-0.923076	23.6792
FAM83F	-1.66861	23.381
ADIRF-AS1	1.47176	23.2278
GALNT1	-0.944918	23.14
GRAMD1B	-0.782004	23.1004
UBA7	2.68253	22.803
TDP2	-0.840533	22.4738
MN1	-0.964286	22.3719
CBX4	-1.01516	22.2986
AHCYL2	-1.0766	22.1731
GPT2	-0.835075	22.1299
SYPL1	1.19428	22.0561
TMEM158	-1.29163	21.8018
HOGA1	1.41725	21.7781
C5AR2	-1.3015	21.7618
IFI16	0.903655	21.7247
MAN1A1	1.18122	21.7105
HN1	-0.76588	21.5087
ATP1B1	-0.58647	21.4986
ARG2	-1.62155	21.4648
ZMYND15	-1.39881	21.2851
BCL6	1.06907	21.2838
RIMKLB	-0.940033	21.2274
B4GALT4	-0.953544	21.2174
TOB1	-0.756721	21.1458
TTLL12	-0.724012	21.1381
VIM	0.904383	21.0695
VDAC2	-0.822706	20.9279
SLC3A2	-0.931671	20.8751
LINC00473	-2.12716	20.8426
IL10RA	-1.86892	20.7653
VASH2	-1.39793	20.6431
HLA-B	0.971429	20.6316
RP1L1	-1.69013	20.5345
NPAS2	-0.872972	20.4453
PDGFA	-1.08478	20.4453
TM4SF5	-1.10171	20.3939
WNT7B	-0.799985	20.2979
FAM107B	-0.896119	20.215
FAM19A5	-1.11308	20.2114
GPT	-0.969889	20.1738
SLC9A3R2	-0.702941	20.1696
DAB2	0.770796	20.0515
STC2	-1.11845	19.945
FURIN	-0.737255	19.9401
LRP8	-0.992579	19.7648
IFNGR1	1.13408	19.7589
SLC7A2	-0.718372	19.6984
IRF1	1.06255	19.6603
UNC5D	-2.27085	19.5904
EFHD2	-0.772139	19.3931
SLC7A7	1.10048	19.2633
SLC6A3	-1.0511	18.9901
CLDN1	0.94919	18.9055
HIST2H2AA4	-0.843563	18.8554
HGD	-0.643874	18.768
SLC45A4	-1.38925	18.7405
FGA	0.778227	18.726
9-Sep	-0.598799	18.6843
AHNAK	0.792347	18.6712
DGKG	-1.48793	18.6632
KRT4	6.45469	18.6571
DUSP4	-0.676174	18.609
SPIRE2	-0.767536	18.5414
ANXA4	0.617671	18.482
LMNB1	1.15	18.4749
UBE2L6	3.23915	18.4517
CH507-42P11.6	-1.59105	18.4012
SLC16A14	-1.31399	18.2213
PER2	-1.31045	18.1912
RGCC	-1.99854	18.0774
KRT16	-1.34486	18.0739
CXCL1	0.791276	18.0416
MAN2A1	1.00473	18.0092
KSR1	-1.07554	17.9829
PLPP1	1.15853	17.9777
ADAM28	1.21047	17.9453
ABHD12	-0.74511	17.9252
PIK3R1	1.08703	17.9217
UNC5A	1.28382	17.8382
ATP2A2	-0.636491	17.8233
SDCBP	0.827025	17.8134
IER3	-0.849588	17.739
DCLK1	-2.98386	17.6696
OGT	0.881623	17.5433
TSC22D2	-1.02721	17.5071
COLCA1	2.037	17.4721
IFITM3	0.73631	17.4259
DDX10	-1.16076	17.4073
RCAN2	2.11507	17.4057
PTPRF	0.779645	17.1844
S100A10	-0.595636	17.1657
PLXND1	0.921033	17.1412
IFITM10	1.11373	17.0597
VTN	0.760934	16.9069
TAX1BP3	1.01095	16.9069
SRXN1	-0.724676	16.82
SPRR3	-1.58987	16.79
KCNK1	-0.814703	16.744
FOXQ1	-1.36436	16.6096
TSPAN15	1.32018	16.5762
GBP2	0.902304	16.4926
CTSC	0.722458	16.4345
MAOB	1.02167	16.3976
PSMB9	2.68959	16.3615
BAG1	-0.913253	16.3457
OGDH	-0.722328	16.0439
SPRYD3	-0.867734	16.0314
CTSS	0.812047	15.921
PTPRN2	-1.08	15.9089
RFK	-0.820975	15.8611
GRAMD1A	-0.896667	15.8511
PDE3A	-0.809257	15.8154
TMEM37	1.29276	15.8124
TOP2A	1.08209	15.7549
FLNB	-0.736893	15.676
MMP7	0.839058	15.6317
B2M	0.571545	15.6173
CYR61	1.03178	15.5492
INSIG1	-0.811728	15.5492
LPCAT1	-0.596893	15.5418
ADSSL1	-0.944363	15.538
DHRS3	-0.625039	15.4466
HES4	-1.0308	15.286
KIF12	2.21607	15.2392
POLM	-1.03367	15.2009
FOXC1	-1.05965	15.1661
KCNK5	0.973881	15.1577
CCDC80	1.43057	14.9832
DCPS	-1.01101	14.844
AVPI1	-0.919096	14.789
PANX2	-0.920145	14.7546
DDIT4	-0.585	14.7439
KALRN	-0.794364	14.6723
JADE1	-0.957464	14.6213
SEPN1	0.768716	14.5242
GEMIN5	1.05338	14.5126
PSMB8	0.938551	14.4297
S1PR1	-0.888037	14.4249
CMTM6	1.43196	14.4137
MLPH	-0.656416	14.4102
PARP9	0.967725	14.3325
ADCK3	1.15516	14.3305
ARL4D	-1.18887	14.2824
NOTCH2	0.924822	14.2778
NOS1	-1.31792	14.272
PMEPA1	-0.772294	14.2408
BAAT	0.788508	14.165
DKK1	-1.71276	14.1501
GADD45B	-0.772283	14.1308
GBP3	0.798554	14.0953
CSGALNACT1	-0.751433	14.0692
EDAR	-1.86607	14.0596
SPATS2L	0.590123	14.0475
ABCB1	0.851773	13.9653
ZFAND3	0.897475	13.961
OAS1	-0.589683	13.9265
TP53INP1	1.38026	13.9265
EPAS1	-0.828634	13.8742
GPC1	-0.645001	13.8049
HYAL1	-0.655517	13.7967
APP	0.589133	13.7385
VDAC1	-0.554698	13.5828
YPEL2	1.52176	13.5571
PSMC4	-0.628826	13.5286
COL27A1	0.774274	13.4562
P4HA3	-1.59562	13.4507
LMO4	-0.816802	13.4385
ASRGL1	0.893905	13.4385
PLIN2	-0.639653	13.403
C1orf198	0.810807	13.3687
SKAP2	-0.896033	13.363
C1orf106	-0.640897	13.3529
ETV4	-1.39558	13.2825
APOB	0.855357	13.2554
DUSP5	-1.12457	13.122
GABARAPL1	-0.638983	13.0922
GPATCH4	-0.682066	12.9487
PDE1C	-1.34345	12.9437
NRP2	-0.646381	12.9282
CSNK1E	-0.625938	12.9108
SDSL	-0.795983	12.9021
CLINT1	0.633824	12.888
BDKRB2	-1.1108	12.8873
PPL	0.684317	12.8348
ARHGEF10L	0.90509	12.8273
DGKD	-1.15578	12.8096
CDYL	-0.955335	12.8022
SLC23A2	-0.624284	12.7677
CKB	-0.605683	12.7375
XBP1	0.53238	12.6601
ARHGEF4	-0.936063	12.6601
CASP1	3.65679	12.6553
UBXN10	-1.2731	12.6549
EDF1	-0.625585	12.6431
PDLIM1	1.25196	12.6069
SERBP1	-0.577823	12.5969
VSIG1	-0.859943	12.4933
GLIS2	0.999586	12.4735
PLIN4	1.51959	12.4308
CTH	-1.03777	12.3715
GPRIN3	-0.919762	12.3269
CYP3A5	0.61915	12.2497
SFRP4	2.40809	12.2466
NOCT	-1.25308	12.2009
DSG2	0.774876	12.1576
TNFSF11	-1.47643	12.1576
PBX1	-0.854472	12.1576
TMC8	-2.75387	12.1195
CD164	0.681206	12.1128
PDXK	-0.828858	12.0867
FAM174A	-0.900017	12.0843
SAMD8	-1.09811	12.0781
PLK2	0.871006	12.0574
PHLDA2	-1.18253	12.0005
PTMS	1.63352	11.9694
SEMA3B	-0.68999	11.953
TBL3	-0.770898	11.953
CXCL8	0.793008	11.9426
ST14	-0.618637	11.8489
RAP1B	0.781691	11.8452
EFNB1	0.680061	11.813
DDA1	-0.721636	11.8013
SDC4	0.917102	11.7939
IFIT3	2.04635	11.7858
FERMT1	-0.789551	11.78
ELMO3	-0.822199	11.6755
ATP1A1	0.579144	11.6719
PPP2CA	-0.53132	11.6448
AMFR	0.667271	11.6439
DZIP3	1.25354	11.5041
GMDS	-0.620837	11.4543
FGFR4	0.57967	11.4468
C2orf72	0.780802	11.4115
SLC12A2	0.672057	11.3926
KCNJ16	0.7619	11.3633
SLC15A1	-0.774469	11.3535
NEB	-0.818916	11.3239
CD14	1.49839	11.293
KIF21B	-0.745311	11.2736
ARFIP1	0.984375	11.2736
HSPA1A	-0.444679	11.2181
VWA7	-1.51381	11.2109
ITGB1	0.514464	11.2087
PDE4B	-1.30775	11.1931
ANXA9	1.69219	11.126
PCDH1	2.12783	11.1224
SPIRE1	-0.748606	11.0937
HLA-E	0.663547	11.0704
EMC10	-0.623394	11.0681
GK	-0.854672	11.0434
DRAM1	1.45912	11.0281
PROS1	0.779628	11.016
PFKFB3	0.489341	10.9666
PIM3	-0.767621	10.9641
NDRG2	0.955839	10.9368
MYO15B	-0.73894	10.9229
TNS2	0.910726	10.8862
RNF130	0.712183	10.8649
CA9	-1.48573	10.8551
C14orf105	1.01576	10.8134
BICC1	1.11914	10.8113
CAV2	0.746035	10.8074
LEPROT	0.748751	10.7892
ST3GAL4	-0.748087	10.7809
RASSF5	1.43325	10.778
SMAD2	-0.816668	10.7652
LAD1	-0.479545	10.7465
PIGR	4.09504	10.7322
POLR2K	-0.827828	10.6816
SORCS2	-1.47952	10.6789
NABP1	1.00717	10.6163
MOB3B	2.26851	10.5747
ELF3	0.471531	10.553
TUBB4B	-0.500356	10.537
UGT2B15	1.82815	10.521
PITPNA	-0.757194	10.5207
CTA-392C11.1	-0.922975	10.5193
ZFAND2A	-0.797363	10.4635
OPN3	-0.70069	10.4622
MATN2	1.78427	10.4617
LAMP1	0.710879	10.4453
MYOM1	-1.7277	10.4059
GNG12	0.741195	10.4057
C4BPB	1.5065	10.3892
TMEM120B	-0.780212	10.3878
ARHGAP18	1.25036	10.3772
DAPK2	1.22927	10.3715
CMIP	-0.501896	10.3574
ATP8B1	1.00494	10.3453
SLC43A1	-0.923717	10.3222
PSMB10	0.752464	10.3101
TMEM97	0.741171	10.3073
NPNT	1.50304	10.2497
DENND2A	-1.61664	10.2475
CEP72	-0.865923	10.2221
GABRE	0.564099	10.2085
ZBTB38	-0.704429	10.1738
SLC6A6	-0.522874	10.1737
EFNB2	1.9867	10.1661
MAP1S	-0.799206	10.154
TNFSF15	1.37353	10.1532
CERS2	0.464848	10.144
GRN	0.56882	10.1278
ALDH3A1	-0.442431	10.1242
LIMS1	0.810944	10.1176
ARF1	-0.451914	10.1169
PBLD	1.36051	10.1157
C1QL1	-1.98151	10.1118
SLC46A3	1.50555	10.1035
NHP2	-0.549557	10.096
HNMT	1.38549	10.0927
TYMS	0.95606	10.056
TP53I11	-0.613072	10.014
TGFB2	0.920838	9.97913
ST5	1.22327	9.95712
MMP24	1.02838	9.91569
FGF12	-1.56246	9.88315
STAT3	0.654595	9.82492
TNFRSF21	0.653912	9.8179
C10orf128	-1.44019	9.80969
RRAS2	1.23005	9.7796
ARRB2	-0.712254	9.75468
ANXA13	1.50383	9.74963
KIF5B	-0.598155	9.74285
ARRDC3	0.919147	9.70109
TNIP1	0.535456	9.67636
IQGAP3	0.735577	9.63414
FARSA	-0.584911	9.62729
STXBP5	-1.10404	9.61624
SIAE	0.826253	9.59229
FAM167A	-0.635308	9.53249
KIF20A	1.01883	9.52744
NFIC	-0.619882	9.49706
FABP5	-0.675381	9.48973
GTF2IP4	0.687747	9.44994
ALDH1A1	-0.427088	9.43267
ADH6	1.60256	9.4223
SLC40A1	0.707772	9.41878
C11orf86	-2.02703	9.41657
SLC9A3R1	-0.416398	9.38643
TRAPPC2L	-0.628757	9.38597
HEG1	1.53141	9.38031
ZNF703	-0.760987	9.36312
EMP2	0.756014	9.33427
MIEN1	-0.729896	9.32955
PSME1	0.568347	9.32752
IL32	1.54354	9.28804
BCAR3	-1.15472	9.28803
AFMID	-0.60996	9.28024
GCKR	2.7388	9.27542
CLCF1	-0.850677	9.2558
CD274	-1.26432	9.22897
TGM3	-1.42257	9.18844
ENAH	0.687499	9.1835
IFIH1	1.2064	9.15262
SAT1	0.512399	9.13449
CREB5	-0.980723	9.13189
RP11-54O7.3	-0.73084	9.12739
HSPA1B	-0.423285	9.11928
CLDND1	-0.833626	9.10601
CEBPB	-0.821022	9.09885
CTIF	0.697296	9.09288
SERP1	-0.675373	9.08154
ATP11A	0.683002	9.07276
FCGBP	1.11118	9.06608
NEURL1B	1.25617	9.06496
ACSS1	1.02687	9.05874
CMBL	0.504872	9.05874
RAB27B	-0.775731	9.02309
BCL9L	-0.564934	9.02161
SLC25A25	-0.954309	9.01664
COPE	-0.544196	8.99277
B4GALT5	0.75113	8.98631
ANKRD33B	1.08774	8.98631
CDHR5	-1.08156	8.97167
CAST	-0.513428	8.96467
ST6GALNAC4	-0.560529	8.96077
MCM7	0.50913	8.95979
LYZ	1.50374	8.93058
ASPH	0.445118	8.92582
RASSF2	0.81981	8.92223
CARD6	0.577809	8.90702
PTS	-0.926965	8.89216
CREB3L2	-0.805852	8.88005
SYNPO	0.501617	8.86781
CST2	-0.525142	8.86631
CHPF	-0.647515	8.85852
SGSH	0.92559	8.85852
SNRPB2	0.854938	8.85821
CH507-42P11.5	-2.9797	8.84445
BCOR	-0.635406	8.82826
SYT1	-2.08138	8.80439
FTH1	-0.418268	8.77465
LGALS1	-0.674279	8.7597
THBS1	1.16619	8.73782
ERGIC1	-0.500007	8.70607
IFIT2	1.77769	8.68276
ATOH8	0.934664	8.64153
PRKAR1A	-0.615627	8.63167
AMOTL2	0.879894	8.62893
JAKMIP1	-1.74638	8.62676
SYNGR2	-0.546802	8.61137
EVA1C	-0.915859	8.60833
NECAP1	-0.955248	8.59139
SDC1	-0.419503	8.58993
MOV10	0.843495	8.58818
C11orf24	-0.779467	8.58612
AJUBA	0.719858	8.58191
UNG	0.756255	8.56103
SLC16A3	-0.509538	8.55201
CH507-338C24.1	1.92817	8.55201
HMOX1	-0.402913	8.51954
ADAMTS7	1.8629	8.51495
SDC3	0.767689	8.51333
SHROOM1	0.565569	8.49196
NPW	-0.522759	8.48471
IGFBP4	0.524846	8.46067
OSMR	0.549577	8.45904
CBR1	-0.488218	8.41102
GLUL	0.800992	8.40191
MAP4K4	-0.580473	8.39996
MXD3	1.19663	8.39996
YIPF6	-0.731249	8.38411
APRT	-0.530662	8.35421
ZC3H14	-0.644203	8.34889
PSME2	0.525742	8.3254
MFSD14B	-0.93725	8.30616
NUDC	-0.51217	8.30273
KLF5	-0.48517	8.30273
CLDN12	0.699485	8.30273
POLB	-0.866953	8.28894
ARL14	-0.749558	8.25822
PPP1R35	-0.775978	8.23167
USP11	-0.67591	8.23099
ZNF467	1.4753	8.21519
ISG15	-0.922681	8.20679
CCDC68	-0.976397	8.20676
NTPCR	0.636342	8.20209
ABLIM1	-0.639384	8.17651
TIPARP	-0.907036	8.16021
ANO6	0.905344	8.15893
TNFRSF1A	0.50547	8.15805
NCCRP1	-2.75657	8.12373
LINC01133	0.95198	8.122
PRKAG2-AS1	-0.915414	8.11269
NMB	0.720486	8.10207
TBC1D2B	0.67984	8.10069
UBE2E3	1.02879	8.09831
SHMT1	0.944347	8.09675
SMAD3	0.644753	8.08406
TMEM131	0.570016	8.08207
F10	-0.680495	8.07345
AOX1	0.836342	8.06992
TUBB4A	-0.748688	8.06382
POLR3H	-0.844545	8.05796
LINC00313	-2.31995	8.04426
TJP2	0.681692	8.03115
SAA2	4.14315	8.00497
CD59	0.58109	7.99715
C10orf90	-1.01988	7.99691
PPP1R16A	-0.635707	7.9837
SDS	-1.80092	7.97952
ANXA1	0.43897	7.97276
RP11-284F21.9	0.860896	7.93388
NR4A2	-1.1829	7.93124
VRK2	-0.682233	7.92622
PVR	-0.52259	7.89447
MYO1E	-0.647472	7.88503
MLEC	0.673948	7.88482
CHST2	-1.19414	7.87863
SAMD4B	-0.549104	7.87678
ALOX5	0.622596	7.86773
SH3BGRL3	-0.637509	7.86773
ARHGEF28	0.799363	7.85343
ZC3HAV1	-0.515945	7.84618
EPHB6	1.44712	7.81182
AHCYL1	0.515105	7.78215
SYK	1.00734	7.72747
CENPF	1.02432	7.72116
GRK5	-0.975279	7.71404
RAB29	0.733239	7.6657
PITPNM1	-0.578998	7.65652
FAM46C	-1.86212	7.63807
ADAMTS9	-0.713834	7.62923
SLC2A1	-0.535415	7.60995
MRPL55	-0.747098	7.60873
SAA1	3.80673	7.6083
PROM1	5.54619	7.60339
RHOQ	0.841509	7.589
MLLT4	-0.49766	7.56285
ACAA1	-0.49148	7.54641
NEDD9	-0.537333	7.52705
GDI1	-0.482307	7.50953
TTLL3	0.905932	7.50709
TPI1	-0.414341	7.49482
CXCL5	0.437492	7.48207
TSKU	-0.538771	7.47396
NDFIP1	-0.481714	7.44618
MDFIC	1.19633	7.44363
NEFL	-1.58611	7.43086
MAP3K1	0.895557	7.41399
GTPBP4	-0.528515	7.40494
IL11	-1.50635	7.40459
UGT1A6	-0.48319	7.37887
DTX3L	0.734806	7.37645
GNL3	-0.729117	7.36237
ERN2	-0.99273	7.35977
PSMD8	-0.527641	7.34004
BMF	1.19357	7.31613
PRSS23	-0.440483	7.26637
PSMA7	-0.471398	7.24812
UCHL1	-0.512548	7.24008
MAST4	0.624369	7.23605
SGK1	-0.628082	7.20321
LPCAT4	0.749497	7.19496
LETMD1	0.862378	7.1888
ZG16B	0.59745	7.1855
NAP1L1	0.486017	7.17868
UNC13B	-0.49855	7.17236
AL135787.1	0.61598	7.17022
C7orf50	-0.624308	7.14138
DNAJB11	-0.50489	7.13818
TRIP10	0.58057	7.12604
POR	-0.435945	7.11525
EIF5A	-0.380125	7.11212
NOC2L	-0.491823	7.10454
NPY5R	-1.09506	7.09588
ZNF622	-0.487048	7.08641
IBTK	-0.595845	7.08162
NSMF	-0.496188	7.07424
LYSMD3	-0.618721	7.06094
ANO8	-0.583909	7.04984
OAF	0.97578	7.04477
CYP26B1	-0.680367	7.03521
SNHG18	0.784547	7.03115
GALNT10	0.679368	7.02729
TRPV1	0.821849	7.00889
CREB3	-0.579054	7.00681
KAZALD1	-0.67979	7.00681
MAP7	-0.629319	6.99845
EMC7	-0.523075	6.95879
PPDPF	-0.567182	6.95336
ADAM9	0.499114	6.94637
BTG2	0.563698	6.94544
NPTXR	0.567056	6.92188
RP3-416H24.1	-0.832249	6.90823
PSMD12	-0.581132	6.90789
MAP3K3	0.990126	6.89747
TRIO	0.642922	6.89711
UHRF1	0.78989	6.89288
STEAP3	0.565131	6.87936
TMEM208	-0.604677	6.87214
ERBB3	0.52569	6.86229
KLF6	0.881818	6.86104
LOXL4	0.76706	6.85687
TERF2IP	-0.500911	6.85629
TMEM92	-0.761043	6.85629
KYNU	-0.425543	6.84958
CNDP2	0.428699	6.84958
ARL2BP	-0.570671	6.84248
SCARB2	0.57395	6.82907
FAM149A	0.713145	6.79241
HSPA5	-0.416927	6.75067
NINJ1	0.689896	6.74953
CCNG2	1.0083	6.73781
GTF2IP1	0.54162	6.73344
MKNK2	-0.489723	6.70621
ALB	0.813875	6.70621
SLCO2B1	2.14288	6.70079
CNTNAP3B	0.686331	6.69691
MKRN1	0.531073	6.68697
ITGB6	0.847111	6.68348
GBP1	4.45804	6.68263
CHMP5	-0.547458	6.68148
SPCS3	-0.625645	6.67593
ACSM3	1.40881	6.66956
KITLG	0.741719	6.66177
SCUBE1	-1.803	6.65939
GUK1	-0.45125	6.64844
CERK	-0.583393	6.64704
ITIH5	0.956263	6.64527
RP11-407N17.3	1.31955	6.64186
EBF4	1.6326	6.64157
EIF4A1	-0.378183	6.63856
AKT2	-0.501337	6.62177
PNPLA7	1.12064	6.61643
INO80C	-0.865489	6.60968
GAPDH	-0.384925	6.59879
NFE2L2	-0.376377	6.5942
CYP21A1P	3.55438	6.58269
MICALL2	-0.586767	6.5805
MYO7A	1.00694	6.57904
ATP5D	-0.526406	6.578
JOSD1	-0.572876	6.56038
SMARCA4	-0.46092	6.55996
RP11-465B22.3	-1.52951	6.55828
PIK3IP1	1.71207	6.54522
TXLNA	0.516883	6.53941
IRF9	0.956135	6.53941
UNC5CL	2.10625	6.50842
MEF2D	-0.442122	6.49826
ABLIM3	0.500432	6.49346
TRIM16	-0.524492	6.48278
COL4A6	-1.0767	6.48131
TGIF1	-0.650335	6.47837
WBSCR22	-0.431615	6.47378
SAP18	-0.474481	6.47107
GAL3ST1	-0.975898	6.46599
ABCG1	-0.876653	6.4594
PAM	0.492636	6.44624
CYSTM1	-0.500514	6.44187
AFAP1L1	1.1844	6.43686
GUCD1	0.492279	6.42604
SKIL	-0.690333	6.41338
ATP6V0C	-0.481132	6.41116
TNFAIP8	0.96922	6.40336
MID1IP1	-0.478004	6.38541
SLC35B4	-0.587119	6.36
TFCP2L1	-0.987242	6.35478
ANP32A	-0.470245	6.35174
LINC01307	-5.04727	6.35174
SLC23A1	1.39314	6.34312
ONECUT2	-0.539124	6.341
LRP5	-0.469796	6.33456
NDUFV2	-0.485169	6.33456
PSMC1	-0.505345	6.33268
FCGRT	0.559261	6.32543
MAP3K10	-0.629817	6.31978
TNFSF10	0.903296	6.30097
SHROOM3	0.838777	6.27307
SERINC5	0.539459	6.27307
TTC1	-0.534032	6.27288
FAM50B	-0.715692	6.26433
CHML	-0.597004	6.2484
CALCOCO1	0.614947	6.23995
RELT	-0.971442	6.22819
CDK4	0.544464	6.2253
LGALS3BP	0.685031	6.22455
IKBKE	0.656018	6.20874
PKHD1	1.06971	6.20308
CPB2	1.7796	6.19968
SOCS1	1.87449	6.1903
TICAM1	-0.624462	6.18445
DBI	0.635895	6.18076
GATM	0.926918	6.17883
UHRF1BP1	0.936392	6.16696
NATD1	1.14272	6.13992
EHBP1	-0.461567	6.13312
SIRPA	-0.391495	6.12289
NQO1	-0.325239	6.10845
TIMP3	-0.968331	6.09996
INF2	-0.407713	6.08646
CTSF	0.699322	6.08499
RIN2	0.886304	6.07923
MYRF	-0.373955	6.0762
FBXW5	-0.457618	6.06613
HNRNPA0	-0.375652	6.06613
NME1	-0.394558	6.05184
DNAJB2	-0.551347	6.05114
ONECUT3	-0.574123	6.0495
FAM20C	-0.559197	6.01044
CYP4V2	0.719963	6.0007
FCHO1	-0.599817	5.99052
NDUFAF3	-0.795593	5.97721
TMEM171	0.933857	5.97129
SDCBP2-AS1	1.54947	5.97129
DPP9	-0.468524	5.9639
LTV1	-0.640504	5.96334
RPH3AL	-0.894154	5.96176
ST6GALNAC1	1.17313	5.96161
C16orf72	-0.462207	5.94786
MRPL12	-0.554053	5.94775
RPL35	-0.457662	5.94703
COX17	-0.825607	5.94695
SCAND1	-0.550636	5.94608
AC091878.1	-2.38555	5.93025
HMCN2	-2.73281	5.92241
CXXC5	0.522246	5.89033
CSTB	-0.4569	5.88825
YIPF2	-0.551566	5.86532
MBTPS2	-0.651442	5.85914
DNAJC27-AS1	4.15395	5.85815
CTDSPL	1.16611	5.84895
RBM47	0.501983	5.84895
UBE3A	-0.545426	5.84314
NOSTRIN	-0.619017	5.84226
SUSD4	1.97483	5.83652
NORAD	-0.478345	5.83412
EML4	0.634655	5.8313
DAB2IP	0.519308	5.83041
ABCA2	-0.460487	5.82509
PTGES2-AS1	1.90717	5.82423
NBPF11	-0.633536	5.80832
SUCLG2	0.55697	5.80743
NOL10	-0.720184	5.80309
BTN3A2	0.65797	5.79155
NUP50	-0.531381	5.78916
MAP2K3	-0.520832	5.78908
KTN1	0.439336	5.78318
HIP1R	0.59852	5.7804
CDC6	-0.64911	5.77481
PLA2R1	0.910966	5.77066
AIFM2	-0.506618	5.76778
RNF19A	-0.529654	5.76741
FOSL2	-0.430205	5.76741
GTF3A	-0.640316	5.75276
WWC1	0.515362	5.73926
TMED7	-0.526607	5.73896
SEPP1	3.01483	5.73437
HADHA	0.387696	5.73318
ZBTB7A	-0.462651	5.71789
PSMA5	-0.402409	5.71677
PREX1	-0.618216	5.70641
MIF	-0.422517	5.70641
ACHE	-0.493417	5.70558
LDLR	-0.518222	5.69346
PHLDA1	-0.431384	5.69346
PTGS2	-1.23621	5.69206
SIK2	-0.540088	5.69187
PSMB7	-0.425679	5.68995
GOLPH3	0.428991	5.68192
RP11-21L23.2	-0.862096	5.66649
ASAP3	1.77434	5.66383
DDX21	-0.547197	5.65104
LCLAT1	0.744601	5.64477
SLC6A8	-0.410157	5.63575
EFEMP1	2.91864	5.62659
CCPG1	0.372172	5.62659
FZD10-AS1	-1.08968	5.62614
TRIM15	1.23216	5.6192
DOK4	-0.4244	5.61027
EREG	-0.580393	5.60941
ZNF117	0.636371	5.59359
CYP2C9	0.769309	5.59286
SUSD6	0.576941	5.58784
LFNG	-0.522459	5.58458
SYVN1	-0.549756	5.58458
KLHL3	-1.51978	5.56776
PPP1R13L	1.12521	5.56015
CDH24	0.641422	5.55432
FAM177B	-1.61048	5.54253
CTBP2	-0.546117	5.54219
RASAL1	-0.761503	5.54012
PIN1	-0.519961	5.54012
CYP2S1	-0.532402	5.54012
UBA5	-0.551356	5.53732
C19orf24	-0.612196	5.53732
MLXIPL	0.661266	5.52841
NOVA1	-0.843753	5.52841
ZC3H12C	-0.710529	5.52841
NPY1R	-0.528736	5.52506
AHR	-0.577446	5.50081
RAB26	0.618106	5.49767
M6PR	0.517958	5.49343
AGPS	0.649777	5.49078
PTGFRN	0.485409	5.48707
C14orf159	1.07633	5.47576
NDUFB10	-0.493695	5.47576
MDM2	0.653492	5.46746
CPEB4	-0.574783	5.45772
TMEM19	0.875767	5.44941
AKR1C4	0.639632	5.44742
CDKN2A	0.78357	5.43873
RUVBL2	-0.490782	5.4349
PPP1R15B	-0.48208	5.42986
PDK4	-0.471606	5.42915
PLK1	0.732042	5.41774
ATP6V1G1	-0.496994	5.41649
B3GNT3	-0.634338	5.40864
PAPSS2	0.443573	5.4004
CYP21A2	4.86982	5.39373
TPM3	-0.387615	5.38838
KNDC1	0.897161	5.38696
LURAP1L	1.0309	5.38483
NUS1	-0.54854	5.37992
AC013275.2	3.94348	5.36208
PPIB	-0.396276	5.3612
BACE1	0.624731	5.35551
RPUSD1	-0.5819	5.34711
ACTB	-0.295672	5.33795
ID3	-0.448775	5.33795
MPV17L	-0.929237	5.30233
PRX	0.889305	5.29755
C6orf48	0.533412	5.29563
TSPAN9	0.699159	5.29494
TPM4	-0.494868	5.29454
SLFN5	0.724175	5.28393
PDGFC	0.955409	5.27734
TCN2	0.660678	5.25231
DHCR24	0.400623	5.25202
FOXC2	-1.00536	5.24532
VPS41	0.562196	5.24404
MUC1	1.65748	5.2437
MRPS34	-0.429115	5.23774
RP11-203J24.8	1.13481	5.23661
BAX	0.476323	5.23521
HLA-F	0.958855	5.22665
VCAN	-0.412861	5.21398
TAPBP	0.42133	5.20702
ABHD17B	-0.696249	5.20078
C5	1.61965	5.19803
BAIAP2L1	-0.444663	5.19442
USP9X	-0.466571	5.19294
TOR1AIP2	0.474096	5.18645
TNFRSF10A	-0.615743	5.17999
SAMD9	0.850048	5.15514
FAM83G	-0.473572	5.15091
TMEM173	1.61883	5.13831
EBI3	2.64525	5.13437
SIKE1	-0.778058	5.13134
CEACAM7	2.69766	5.13133
CTSA	0.389577	5.12201
KLHDC8B	0.906586	5.11458
CENPJ	0.990998	5.11166
FGL1	0.685835	5.10722
METTL7A	3.58844	5.10334
DPP4	2.05723	5.10333
C1orf116	0.640617	5.09927
ADAM12	-0.680078	5.0979
SLC25A29	0.583774	5.0979
FZD3	1.52533	5.08944
PRICKLE1	2.28527	5.08688
MCC	-0.568498	5.08124
NR2F2	0.397104	5.07615
SCARA3	0.891851	5.07474
ADGRG6	0.988411	5.07124
UGT2B11	-1.03366	5.06281
RMI2	0.95362	5.05854
RPS15	-0.381913	5.05697
IFIT1	2.04343	5.05697
SRD5A3	0.578206	5.05686
CLDN7	2.27917	5.05686
PSMD7	-0.460003	5.04243
TXN	-0.327707	5.03859
RARG	0.97761	5.03683
PI4KA	-0.443856	5.0355
MIA2	1.34219	5.03475
MGAM	1.75755	5.03475
LAMC1	0.399238	5.01695
SLC25A45	-1.20348	5.01271
LBH	0.608616	4.99406
CTD-3128G10.7	2.55987	4.98466
IDI1	-0.45822	4.98158
RPL26L1	-0.592962	4.97147
HSPG2	0.525728	4.97147
TMEM151A	-0.687423	4.97147
MUC5AC	-1.43383	4.9659
CYB5B	0.586374	4.96392
BCAS2	-0.592984	4.96392
CACYBP	-0.35131	4.9597
SLC22A18	-0.515961	4.95462
TRIM22	5.03457	4.95462
CD247	-2.46925	4.95462
KXD1	-0.503513	4.95417
CSNK1G1	0.853716	4.95388
SELK	-0.661872	4.94506
LONRF2	-0.881413	4.94041
PARP14	0.660221	4.93795
CCDC85B	-0.614202	4.93357
ENTPD6	-0.367661	4.9281
SGPL1	0.719285	4.92523
UBE2M	-0.450692	4.9129
NOL6	-0.433396	4.9129
TNRC6C-AS1	0.936228	4.91181
BFAR	0.514358	4.89475
YWHAQ	-0.333552	4.89062
SHC2	0.796935	4.88441
COPS6	-0.377011	4.87926
LSMEM2	-1.14631	4.85753
FAM171A1	0.670866	4.85185
PSMF1	-0.441393	4.84832
ARHGDIA	-0.389026	4.84232
CYP4F3	-0.400379	4.839
DUOX2	1.15244	4.83756
FGFRL1	-0.514627	4.83737
SESN3	-1.15121	4.83737
STRAP	-0.516746	4.82805
TRMT112	-0.566853	4.82022
NECAB3	-0.509484	4.81104
CEACAM5	-1.49012	4.80025
NCOA3	-0.473756	4.79934
RDH14	-0.623733	4.79842
EFR3B	-1.64077	4.79647
PSMD14	-0.410629	4.79414
CYP24A1	0.327904	4.78909
TPX2	0.556468	4.77854
PDCD4	0.63159	4.77422
TMEM245	-0.505463	4.76673
NDUFAF2	-0.590367	4.76673
PTRF	0.521595	4.76673
HIST2H2BE	-0.555083	4.76412
GNB1	-0.459791	4.76168
TMEM233	-1.69788	4.75692
APOBEC3B	0.693121	4.75065
HNRNPAB	-0.309718	4.74887
ANPEP	3.19314	4.74559
PSMB8-AS1	1.70635	4.7314
TFF3	-0.849112	4.73025
GPR157	-0.844285	4.73025
NANS	-0.396733	4.72264
RAB7B	2.21138	4.71743
IMP4	-0.458189	4.71613
PHLDB2	-0.631086	4.7156
RAD23B	-0.380038	4.71143
ACAP1	2.3396	4.704
WARS	-0.479973	4.70235
STX1A	-0.515752	4.70036
CTDSP2	0.697174	4.69763
ATG101	-0.432156	4.69394
UBE2V2	-0.545872	4.69394
SLCO4A1	-0.813939	4.69372
SLC37A4	0.711967	4.69372
LDOC1L	-0.58207	4.68638
C1GALT1	-0.52965	4.68585
C3orf80	-1.24668	4.6814
ADRA1D	1.10686	4.68088
HAO1	0.824484	4.67891
KIAA1683	-1.10441	4.67614
ADCY3	0.83712	4.67453
CDKN2B	0.802616	4.66528
CYB5A	0.455692	4.65773
GTSE1	1.07007	4.65512
EIF5	-0.382642	4.62956
SRRM2	0.341105	4.62947
ATP6V1F	-0.420288	4.62856
KIF16B	-0.681954	4.62167
NR5A2	1.47193	4.62153
SEC13	-0.477018	4.61722
KCNS3	0.49432	4.61722
ARL4C	-0.659601	4.61722
CHMP2A	-0.413641	4.60682
LINC00963	-0.403499	4.602
RPL8	-0.308097	4.59814
RARS	-0.490508	4.59769
SLC25A20	0.700918	4.59724
SERPINB1	-0.393732	4.58353
POLH	0.88773	4.58174
TRIB2	0.792676	4.57846
CDK18	1.93574	4.57846
SLC38A1	-0.466253	4.57585
CLIC1	-0.341527	4.57319
SLC39A1	0.351071	4.57008
PHPT1	-0.380334	4.55666
SLC51B	-1.6045	4.55124
VSTM2L	0.537562	4.54805
KLHL24	0.710533	4.53202
JAZF1	0.843381	4.52831
AKR1C8P	1.15499	4.52281
RASAL2	0.732506	4.52234
MSN	0.35713	4.52075
EDA2R	0.686236	4.51805
CRACR2B	-0.496463	4.50943
PYROXD2	0.813861	4.50522
BAP1	-0.480132	4.50068
AURKAIP1	-0.443677	4.50068
PDE8A	0.522678	4.48786
IDH2	0.396869	4.48362
KIAA1161	0.474089	4.47622
KANSL1L	1.13141	4.47187
TBC1D7	-0.833083	4.47077
DHTKD1	-0.501544	4.47077
PAM16	-0.618993	4.46594
EGR1	0.967662	4.44561
GALM	0.667409	4.44314
TTC19	0.611221	4.44179
TLR1	1.51297	4.43454
SCRN1	0.474018	4.42595
PSMD11	-0.508483	4.42368
CTGF	1.33804	4.42366
SCAMP1	-0.535298	4.42215
MUC2	-3.1266	4.41646
RP11-462L8.1	-0.93996	4.40955
CCDC78	-0.705827	4.40741
SDF2L1	-0.462865	4.40026
TNS3	0.362466	4.39905
LANCL1	-0.542353	4.39661
C10orf10	2.13892	4.39049
DNMBP	0.699128	4.38748
SPINK1	1.13538	4.38428
PRRG4	2.43339	4.37972
TMEM63B	-0.409254	4.37797
TPD52	-0.512084	4.37676
BICDL1	-0.741815	4.3701
LRRC59	-0.339963	4.36918
BUB1B	0.737429	4.36825
CHMP7	-0.442969	4.36341
KAZN	-0.825275	4.3588
BAIAP2-AS1	0.656081	4.35152
VSTM4	-0.931928	4.34883
CNTN1	-0.575069	4.34731
PSME3	-0.425725	4.34295
PES1	-0.376166	4.33974
SESN2	0.833018	4.33698
TUBG1	-0.478248	4.30522
MNT	-0.478738	4.29941
TUBA1B	-0.329948	4.2973
C19orf53	-0.43264	4.2968
MAGED1	-0.30688	4.29598
GRPEL1	-0.613745	4.2921
PFDN2	-0.441153	4.29098
HR	0.652062	4.28324
C16orf13	-0.599578	4.28089
LPCAT3	0.673564	4.2798
VAC14-AS1	-1.25263	4.2798
ELK3	0.797031	4.27688
RPL36	-0.333563	4.27688
EIF3C	-0.328385	4.27206
TMED10	-0.334644	4.27198
RAP2B	0.453271	4.2638
FLYWCH2	-0.612005	4.26351
TRIM56	0.384313	4.26066
TRIOBP	-0.412249	4.25875
CES3	3.75512	4.25767
FGD4	0.843381	4.25586
HIST2H2BF	-0.809397	4.25127
KIAA0101	0.641413	4.2317
MICU1	-0.430001	4.22781
UCK2	-0.395924	4.22504
SLC19A1	-0.801883	4.22466
FLNB-AS1	-1.81559	4.22466
ANK3	2.3742	4.21626
C14orf132	3.3604	4.20965
PC	-0.506114	4.20406
SERPINA1	1.97397	4.20406
PRSS12	0.919099	4.2016
HDAC8	-0.632928	4.19614
APPBP2	-0.732413	4.19579
ZNF136	1.45865	4.19455
WDR18	-0.554053	4.19385
DNM2	0.331871	4.19385
ARF6	-0.379184	4.19248
RIMBP3	-0.815627	4.191
STIM2	-0.568887	4.18936
EPS8	-0.435527	4.18293
NAXE	-0.361159	4.18159
LINC00847	0.747049	4.17612
TFPI	0.403939	4.1751
MCCC1	0.535699	4.17491
CD24	0.320114	4.17088
HIBCH	0.527611	4.16844
PLPP6	-0.612987	4.16017
PAGR1	-0.522932	4.15864
IL13RA1	0.536237	4.15839
BHLHE40	-0.400696	4.15483
SRA1	-0.482883	4.15381
MRPL14	-0.517065	4.15129
NCAPD2	0.702674	4.13307
SGK2	0.719606	4.12551
UBQLN1	-0.385528	4.12551
C17orf107	-0.771117	4.12087
SEC16A	-0.425374	4.11932
TMSB10	-0.320196	4.11825
SPRYD4	0.702337	4.11825
ACOT13	-0.524568	4.11527
CALU	-0.394221	4.11347
NAPRT	-0.460417	4.11326
PDE4D	-0.639184	4.10635
RAB4B	-0.70871	4.10525
NCDN	-0.495182	4.09764
SS18	0.556896	4.09613
BTN3A1	0.619651	4.09036
ANLN	0.532397	4.08334
COA4	-0.438858	4.08293
HMGN5	0.64613	4.08244
RCAN1	0.918608	4.08073
GCDH	-0.58824	4.07959
MRPL17	-0.547988	4.07483
KDM5A	-0.804872	4.07458
MUC12	-0.926151	4.06972
CYCS	-0.37875	4.06944
LINC01426	-0.967161	4.06795
CCDC124	-0.399391	4.06283
TRIM45	0.914745	4.05782
MRPL21	-0.673347	4.05728
SRPRB	-0.422532	4.0556
PSMB6	-0.381227	4.05381
YAP1	0.537099	4.05166
PRR26	-0.859198	4.04882
PLSCR1	0.611757	4.04882
QPRT	1.20446	4.04232
AGTRAP	-0.471403	4.04039
TAB2	0.593604	4.0384
RAP2C	0.590957	4.03268
HSPB8	0.533522	4.02901
C19orf33	-0.498729	4.02224
POLR3D	-0.473669	4.02147
IGSF8	-0.46598	4.01964
STAM	-0.659134	4.01867
SEC11C	-0.469076	4.01796
EBNA1BP2	-0.439129	4.01771
HSPB1	0.372938	4.01682
DPYD	1.18571	4.01478
APH1A	0.374543	4.0071
DDX41	-0.421372	4.00521
PFDN6	-0.550583	4.00489
FZD8	-0.454602	4.00351
ARRDC2	-0.431226	4.00324
LIPA	0.420957	4.00078
ARHGAP11B	1.35589	3.99869
GIPR	0.867826	3.99745
DDB2	0.670895	3.99454
ARCN1	-0.434257	3.99085
ACVR1C	-1.18855	3.98864
TMC5	0.537119	3.98345
ADIPOR1	-0.383964	3.98225
ERAP2	1.58988	3.98221
ELOVL2	0.503483	3.98021
ADGRV1	1.94317	3.97814
SLC17A4	2.62614	3.97778
CCDC85A	3.35294	3.97185
VEGFC	-0.620017	3.96582
TNXB	1.73787	3.96187
TACC2	-0.451124	3.96163
PLIN5	1.18299	3.96007
IDH3A	-0.568496	3.95721
HSPBP1	-0.498756	3.95237
MAGI1	0.804262	3.95205
TP53	0.551377	3.94707
SFN	-0.72683	3.94198
TAGLN2	-0.295307	3.94157
FKBP4	-0.322012	3.94
PTPRK	0.478549	3.93958
SLC26A6	-0.599075	3.93158
PMVK	-0.384285	3.92331
BLCAP	0.474674	3.92331
ZFP90	0.669027	3.91785
DRG1	-0.434611	3.91773
CYB5R3	-0.316729	3.91458
EMD	-0.481957	3.91237
RGL1	1.37386	3.91237
EIF1	-0.296823	3.91059
LINC00589	-2.45651	3.90821
SUCLA2	-0.509861	3.90246
CHDH	0.948591	3.9012
DTX4	0.584547	3.90032
HDGF	0.270641	3.89934
CCDC74B	1.69919	3.89874
C1QTNF5	0.795379	3.88992
NPL	0.583943	3.88397
RHEB	-0.362759	3.88248
GLDC	-0.428961	3.88114
MEGF6	1.29451	3.874
SRP19	-0.437019	3.87379
RSPO3	-1.19367	3.86853
PLSCR4	2.03338	3.86833
NR4A3	-1.48621	3.86833
MMD	1.46998	3.86696
LYNX1	0.792065	3.86315
AGFG2	0.443684	3.86151
SPDEF	-0.476762	3.86012
DNAJA4	-0.573439	3.8558
ARL1	-0.554633	3.8542
EIF2S1	-0.47714	3.8542
ANKRD52	0.332122	3.85249
IMPA2	-0.395661	3.84959
LACTB	0.557451	3.84726
SRP9	0.365869	3.83639
COL4A2	-0.342291	3.8332
SLC8B1	0.471245	3.83303
PHKA1	-0.569902	3.82635
RNPS1	-0.373966	3.82602
GSTM2	1.05446	3.82471
YIF1B	-0.598708	3.82468
KIF1C	0.515906	3.82452
TNFSF13	0.753666	3.81945
PAF1	-0.425534	3.81866
NCLN	-0.405406	3.81866
PDAP1	-0.372329	3.81727
KDELR3	-0.425151	3.8172
MYBBP1A	-0.471348	3.80454
NIPAL3	0.719827	3.80001
MAD1L1	-0.552002	3.80001
COG5	-0.658804	3.79938
PPARD	-0.521527	3.794
RAB37	-0.557633	3.78988
A4GALT	-0.517524	3.78941
SYT12	-0.452054	3.78235
GAN	-0.628668	3.78161
SGMS1	-0.56093	3.77946
ARHGEF16	-0.632656	3.77851
INTS1	-0.438597	3.77714
CAP2	0.545938	3.77585
RNF24	0.628273	3.77559
FADS1	-0.408924	3.77216
TMEM213	-1.05289	3.76955
PPP1R14D	3.13972	3.76676
DCDC1	0.954252	3.75818
TMCO3	0.454826	3.7577
PEAR1	-0.485607	3.75711
ZNF224	0.64813	3.75711
CYP39A1	1.10466	3.757
SLC13A5	2.82954	3.75559
B3GNT9	-0.366134	3.75541
ARSE	0.38134	3.754
TPGS1	-0.568204	3.75134
BPNT1	0.46614	3.74987
NETO2	-0.441264	3.74934
UBR3	0.506566	3.74176
ADO	-0.537232	3.73956
CDH6	1.08886	3.73293
AIMP2	-0.515756	3.7325
CABIN1	0.641682	3.73192
DLGAP4	-0.703803	3.72892
CTSO	1.25795	3.72743
CREB3L3	1.07762	3.72459
TCF7L2	-0.63351	3.72443
PPP1R3B	0.754354	3.72443
SERPINB8	-0.816612	3.72198
SFXN5	0.547028	3.71372
TIMM17B	-0.391116	3.71302
ILDR2	2.33295	3.71302
NKX1-2	-2.57097	3.70774
NME3	-0.506955	3.70633
BPIFB1	0.556823	3.70461
SHH	0.457396	3.70276
SCNN1A	1.90404	3.70196
SULT1A1	0.594149	3.69669
TUBA1C	-0.404399	3.69624
KLC2	-0.492727	3.69624
ENGASE	0.482811	3.6931
BRIX1	-0.452599	3.69246
SIDT2	-0.740031	3.68508
LINC00472	2.69012	3.68201
ASPM	0.541668	3.68114
KIFC3	0.291147	3.67994
TEAD2	0.542743	3.67976
CFLAR	0.332439	3.67897
ATG16L1	-0.619772	3.67552
MARK4	-0.522645	3.67413
POLRMT	-0.358081	3.67301
S100A13	-0.450929	3.67301
KIAA0319	-1.02246	3.66621
TOP1	-0.362319	3.66593
LRRC75B	0.769255	3.66581
LAMB2	0.574945	3.66561
CCT4	-0.302345	3.66258
TMEM159	0.974891	3.65992
COL6A3	-2.334	3.65992
MFSD3	-0.594724	3.6514
TBC1D2	-0.374179	3.6484
LITAF	0.432929	3.63931
EFNA1	0.684298	3.63595
GPX1	-0.351719	3.63595
APOBEC3C	0.612468	3.63586
CYTH3	0.84949	3.63381
SEMA4B	0.460408	3.62933
CCNB1	0.447303	3.62746
PKP4	0.486994	3.62746
TSC2	-0.32169	3.62362
CARHSP1	0.416979	3.6214
ZNF189	0.496919	3.61915
MAFF	-0.514205	3.61915
PCDHA12	0.631427	3.61678
IFITM2	0.433586	3.61536
STK24	-0.396941	3.61369
VPS37A	-0.554763	3.61369
COPZ1	-0.400511	3.61351
PLEKHN1	-1.24471	3.61213
ACLY	-0.311255	3.61044
ARHGEF40	0.398232	3.61036
ZNF593	-0.684349	3.60909
IL17RB	1.20146	3.60599
TMF1	-0.592164	3.60486
CDHR2	-0.50017	3.60417
NRCAM	0.535603	3.60333
IL17RC	0.628208	3.60284
ZNF302	0.748651	3.59486
DCTN5	-0.477806	3.59285
TNFRSF10B	0.323565	3.59089
DDX19B	-0.498061	3.59037
CDK14	-0.484308	3.58376
ZNF503	-0.441199	3.57872
HAL	-0.932631	3.57827
POLR2F	-0.422124	3.57584
BRMS1	-0.505857	3.5757
SLC35G2	-0.568293	3.57454
PLCD3	0.529035	3.57334
DHDDS	-0.488797	3.57147
IKBIP	0.455658	3.57098
ISYNA1	0.600696	3.56847
HERC6	1.25153	3.56703
ACO2	-0.309593	3.56388
SERPINA5	1.16665	3.56056
NDEL1	-0.470105	3.56023
STX3	0.750931	3.55663
CNBP	-0.361293	3.55228
METRN	-0.329172	3.54701
SYTL2	0.847043	3.54701
HK1	-0.580745	3.54296
NOMO2	-0.328475	3.54217
NAA50	-0.511459	3.54136
SLC25A22	-0.766252	3.54124
MOGAT1	1.52526	3.53955
PRODH2	0.541927	3.53937
P4HTM	-0.481845	3.53623
DMXL2	0.708986	3.53359
GLTPD2	-0.637818	3.53352
CCNH	-0.470035	3.53008
PDPR	0.397152	3.52667
CRIP3	3.79744	3.52234
MRPS23	-0.469975	3.52164
DPH1	0.518499	3.51764
PLEKHG2	-0.460908	3.51158
HAUS4	0.61516	3.50441
ADRM1	-0.382177	3.50199
RP11-806H10.4	-3.17139	3.49732
LINC00857	-0.827337	3.49588
OPTN	0.399055	3.49473
DERL1	-0.457626	3.4918
CERS6	-0.414774	3.48671
LAMB1	0.321228	3.48394
UBE2N	-0.526376	3.48306
HSP90B1	-0.288826	3.47984
TPD52L1	0.452794	3.47327
ADCY7	-0.608924	3.47074
AGBL5	0.664892	3.4704
IWS1	-0.44406	3.46828
MCM4	0.548714	3.46712
ARAP3	0.514434	3.46674
EMC4	-0.358545	3.46482
ZPR1	-0.707484	3.4643
KANK1	-0.39394	3.46238
KIAA0408	0.925897	3.46163
MOCS2	-0.336637	3.45636
HDAC5	0.58331	3.45352
CD276	0.382136	3.45127
C1orf115	0.455599	3.45127
JMJD4	-0.464714	3.45015
RAB3A	-1.1453	3.45015
MCRIP2	-0.428296	3.45015
DCTPP1	0.412799	3.45015
PGD	-0.273126	3.44745
FUS	-0.325094	3.44608
PSMD3	-0.332776	3.4434
NUP85	0.588888	3.4434
PRKAR1B	-0.668616	3.43943
RBMS2	0.555848	3.43673
ZNF558	0.630084	3.43446
RAD23A	-0.409122	3.43247
HFE	0.603551	3.4254
SLC25A11	-0.575332	3.42255
FOSL1	-0.671915	3.42245
LINC01021	0.94077	3.42041
ARHGEF17	0.691091	3.41902
CDC37	-0.33109	3.41494
INSR	0.551438	3.41398
MYH14	-0.318891	3.41207
GNPDA1	0.473844	3.41207
ARF4	-0.387777	3.41038
HMMR	0.713682	3.41009
ZC3H12A	-0.355086	3.41009
VTCN1	6.07399	3.40845
WDR6	0.448748	3.40558
LINC00342	0.993242	3.40067
TPPP	-0.549358	3.40016
HEXIM1	0.350167	3.39894
GMPPB	-0.442323	3.39554
PLA2G6	-0.484461	3.39459
LINC00294	0.955679	3.39459
CTNND2	-0.603509	3.39287
PAQR3	-0.66072	3.39117
SCYL1	-0.405528	3.39033
HLX	0.915428	3.38953
PARD6A	-1.03373	3.38614
ZNF266	0.550791	3.38121
FAM53B	0.492276	3.37183
UAP1L1	0.752122	3.37052
COPG1	-0.341366	3.35874
ZNF385A	0.544278	3.35825
RP11-81A22.4	-1.02677	3.35719
KLHL30	0.774406	3.35433
AMOTL1	-0.529193	3.35215
CREG1	-0.273793	3.3474
C5orf66	-1.19216	3.3474
TMEM238	-1.35292	3.3474
ALCAM	0.289962	3.34691
AP001046.5	-1.48926	3.343
PDLIM5	-0.385474	3.34148
NT5E	0.388337	3.33979
BMP3	1.18437	3.33979
CCT7	-0.286962	3.33935
SPON2	2.06274	3.33935
STARD13	1.30357	3.33818
COL7A1	-0.39668	3.33604
EXOC5	-0.451472	3.33342
FNDC3A	-0.408916	3.32878
SEMA5A	0.531946	3.3258
HNF4A	-0.412745	3.32477
STBD1	0.488239	3.32469
HHIPL2	-0.861901	3.32336
HNRNPUL2-BSCL2	-0.467705	3.32254
TRAF5	0.837665	3.32244
DEPDC1	0.821027	3.3212
LYPD1	-0.266897	3.3212
CDC34	-0.392298	3.3191
SOX7	-0.650988	3.31529
DCTN6	-0.39673	3.31378
TCN1	-0.339502	3.31027
RBPMS	-0.318238	3.30802
RPS2	-0.26441	3.30729
SLC7A11	-0.410726	3.30729
FAT1	-0.42518	3.30644
FAM177A1	-0.435803	3.30644
NUPR1	4.6554	3.30542
NUMB	0.46746	3.29396
FAM89A	1.00384	3.29311
TSPAN1	2.04159	3.29121
YWHAG	-0.323981	3.28923
TMEM141	-0.5201	3.28923
IL6R	0.523965	3.28789
TCTN1	0.67855	3.28378
RABEPK	-0.530975	3.28227
UBE2K	-0.464184	3.28045
TMED3	-0.343654	3.28011
SMAP2	-0.476972	3.27531
GPD1	0.443425	3.27488
FAM161B	0.961622	3.26759
TLR3	2.90169	3.25321
DPY19L4	0.651238	3.25177
CLCN7	0.340214	3.24956
MPHOSPH6	-0.534671	3.24956
CATSPERB	-0.652399	3.24664
RACGAP1	0.77362	3.24617
IMP3	-0.388417	3.24111
CHTF18	-0.445671	3.23847
CENPV	-0.463527	3.23839
NDUFB4	-0.344146	3.23684
C6orf223	-0.908136	3.23581
ERLEC1	-0.38176	3.23345
MYC	-0.373504	3.23249
PELO	-0.341261	3.23054
POP7	-0.529362	3.23023
MOB4	-0.562626	3.22882
UQCRC2	0.42576	3.22579
TMEM248	-0.425139	3.22524
BRI3BP	0.409086	3.22395
JTB	-0.316545	3.2228
FAM131C	-0.955875	3.21993
ZC3H7A	0.400289	3.21948
DENND3	-0.403594	3.21713
NPTX2	-0.35678	3.21282
TIMM17A	-0.318775	3.21172
HIST1H1C	-0.461984	3.2085
SRP72	-0.388377	3.20759
TANGO6	-0.779701	3.20612
RAC1	0.290218	3.20565
LARP1	-0.404772	3.20366
PROM2	-3.78105	3.19368
SEC23A	-0.498517	3.19224
CAMK2N1	-0.368955	3.18864
PRDX2	-0.288603	3.18864
BYSL	-0.491505	3.18658
ITPK1	-0.38624	3.18581
UBB	-0.252312	3.18404
PSMD4	-0.293676	3.18233
F2RL1	0.441183	3.18233
ZNF608	0.732624	3.18189
PLA2G4C	0.731772	3.17751
ZNF704	0.926295	3.17524
YIPF5	-0.425877	3.17398
ABHD6	-0.816699	3.17286
TCIRG1	-0.346572	3.17203
PRKCE	-0.862298	3.17203
CTTN	0.299589	3.17097
HYAL2	-0.464574	3.16983
MARVELD2	0.877805	3.16966
PITRM1	-0.383222	3.16516
PRELID1	-0.325833	3.16291
RP13-870H17.3	-1.14736	3.16133
FAM105A	0.831929	3.15443
SSSCA1	-0.849782	3.15359
HAGHL	-0.480926	3.15175
OLFML2B	1.72964	3.14459
MYO10	-0.396083	3.14354
NFKBIA	0.459798	3.14059
CYP51A1	-0.340004	3.13817
RRP7A	-0.379781	3.13776
MBTPS1	0.335221	3.13775
GPR137B	0.837428	3.13691
ATP6V1E1	-0.343275	3.13691
RNF7	0.433533	3.13402
ARID3B	-1.0212	3.1339
RBKS	-0.542899	3.13256
RASEF	-0.376422	3.12826
ALAS1	-0.318222	3.12756
DUSP3	0.352114	3.12756
ASPHD1	-0.356182	3.12635
GOLGA2	-0.361164	3.12304
SEC11A	0.353189	3.1227
MTMR6	0.71395	3.12176
ST6GAL1	1.65048	3.12015
OCLN	1.84181	3.11777
CBR3	-0.810303	3.1136
CDC42EP3	-0.824295	3.11233
CCT5	-0.271507	3.10713
ZDHHC23	1.2219	3.10639
KIF2C	0.773562	3.10159
NKIRAS2	-0.410667	3.10035
CDC42EP1	-0.297681	3.09324
GALE	-0.371362	3.09135
CEBPD	0.545519	3.09076
COL5A3	1.16835	3.08968
SRRM3	0.884226	3.08696
MTMR9	-0.68015	3.08634
PICK1	-0.515244	3.08321
DUSP10	0.847646	3.08321
RAB11FIP5	0.353775	3.08177
SDPR	2.60677	3.08163
KCNH5	-1.7152	3.08063
ALDH7A1	0.385753	3.07897
FBXO17	0.795607	3.07888
NDUFAB1	-0.430271	3.07774
BAMBI	-0.302804	3.07678
CTSL	-0.300015	3.0719
RBM18	-0.595487	3.07004
GPRASP2	0.675594	3.0669
QARS	0.371681	3.0664
RAPGEF1	-0.435249	3.06602
PLPP5	-0.448097	3.06272
RIF1	-0.498709	3.06066
SUFU	0.620044	3.06047
CCNJL	-0.639405	3.05978
PHC1	0.757805	3.05612
AC007743.1	5.09491	3.05205
NELFE	-0.421337	3.04753
ZFP36L2	-0.295961	3.04636
GLT8D1	0.769062	3.04154
CASP5	6.39954	3.03973
PRKCDBP	-0.569699	3.03973
MSLNL	-1.11945	3.03828
MMP15	0.263754	3.03452
SVIL	-0.337346	3.03438
F7	-0.563523	3.03303
APEX1	0.279552	3.03238
MICALL1	0.464904	3.02183
ARFGAP1	-0.322518	3.02109
CBX8	-0.730126	3.01893
PSMB1	-0.380118	3.01754
LIMA1	0.862645	3.00977
THSD4	-0.378595	3.00762
S100A6	-0.248132	3.00594
RRP1	-0.478053	2.99777
TSPAN3	0.284046	2.99434
FAM45A	0.570482	2.99054
SPTY2D1	-0.722371	2.98629
FOXA3	-1.00625	2.98473
RHOG	0.715333	2.98369
ZHX2	-0.370136	2.98227
NTMT1	-0.444374	2.97844
SCARB1	0.399565	2.97646
TOMM40	-0.368416	2.97528
CNR1	0.621346	2.97364
PPP1R11	-0.380912	2.97138
PIEZO2	1.8889	2.97112
CXCL2	0.503413	2.97072
KREMEN1	0.693749	2.96964
LBR	0.443655	2.96774
TSC22D4	0.38022	2.96763
SEMA4D	-0.469776	2.96618
ZC3H15	-0.356949	2.96563
CHD4	0.462707	2.9642
AFAP1L2	3.5376	2.96109
MYH10	-0.661603	2.95711
C4B-AS1	3.31248	2.95661
GADD45GIP1	-0.440597	2.95362
SQSTM1	-0.283739	2.95192
USP30	0.787712	2.94946
STOML1	0.607151	2.94872
NR1D1	0.631547	2.94638
PMAIP1	-0.668076	2.9398
CRIM1	0.496355	2.9398
CAPN15	-0.36953	2.93869
FAM157C	-5.22524	2.93415
TSPAN13	-0.350133	2.93122
BMP4	3.95994	2.92646
IPO9	0.377266	2.92255
COX8A	-0.333505	2.91985
SECISBP2	-0.427283	2.91985
RP11-631N16.2	1.00722	2.91985
LINC00672	0.956966	2.91985
PDHX	-0.61665	2.91933
EXOC4	0.436477	2.91906
PPP1R18	0.435755	2.916
SAR1A	-0.38789	2.91445
MSLN	-0.383728	2.91044
VASN	0.438741	2.91001
CDK19	0.880271	2.90193
ZSWIM6	-0.456698	2.89566
ORC6	0.660194	2.89412
ABCA10	1.68526	2.89412
KLF11	1.00574	2.89352
RP11-343C2.11	-0.356762	2.88857
CHPF2	-0.354569	2.88767
DYNLRB1	-0.415224	2.88631
COLGALT1	-0.285293	2.88591
GUF1	-0.696613	2.88283
ARL6IP1	0.302422	2.88053
NOLC1	-0.358646	2.88045
RP3-395M20.8	-0.677185	2.8794
NBPF14	0.515187	2.8791
ITM2B	0.315297	2.87826
SRGAP2	0.705543	2.87826
STMND1	1.51512	2.87785
GPCPD1	-0.542255	2.87651
MCM5	0.397508	2.87479
HLA-C	0.331725	2.87479
DBNL	-0.318405	2.87353
TMEM229B	0.938409	2.8703
CKS1B	0.491197	2.86699
TIA1	0.435164	2.86619
RPS6KA3	0.464802	2.86208
UBL4A	-0.364267	2.86132
TRIM66	-0.890393	2.85857
PSMA6	-0.314763	2.85746
SPATA2L	-0.585186	2.85738
TMED4	-0.324734	2.85705
EIF3G	-0.299577	2.8561
SRC	-0.262479	2.85599
ASF1A	-0.494872	2.85528
PRDX5	-0.258055	2.85507
MYO6	0.408681	2.85447
MRPL41	-0.318509	2.85423
OTUD6B	0.803119	2.85071
MASP1	-0.341354	2.8498
U73166.2	-1.54757	2.8498
S100A1	1.09602	2.84948
NDUFS6	-0.327171	2.8468
MMS19	0.545446	2.84559
BPGM	0.584884	2.844
SREBF1	-0.373835	2.84168
SLC26A2	0.703544	2.84168
AR	0.373654	2.84142
XRN1	0.814863	2.84042
ARNTL	-0.834374	2.84026
TRAK1	-0.371301	2.83846
KRT86	-1.10456	2.83783
RP11-228B15.4	1.03367	2.83783
SCYL3	0.59672	2.8375
CWC15	-0.538068	2.83701
C1QBP	-0.293046	2.83642
IL6	-0.96061	2.83642
CFHR1	1.36762	2.83551
MAPK1IP1L	-0.485484	2.83313
GTF2A1	-0.580383	2.83031
SP100	0.49668	2.82759
NFIB	1.06456	2.82643
TXNDC11	-0.399764	2.82556
TRPM4	0.455489	2.82344
C4A-AS1	3.18565	2.82344
FOSB	-0.842068	2.82212
PLCB1	-0.48223	2.82192
RP11-184M15.2	-2.27578	2.81959
LMAN1	-0.373016	2.81889
GPN3	-0.627642	2.81773
ATP6V1H	-0.483927	2.81497
PPP6R1	-0.304587	2.81359
ORAI3	0.537921	2.81359
ERICH4	2.56268	2.81359
CDCA7L	0.558523	2.81354
NHS	0.965567	2.80982
ADAM15	0.330669	2.8084
ARL6IP4	-0.375823	2.80694
RP11-295K3.1	0.352237	2.80381
CBX7	0.403467	2.80264
COL4A4	-0.44574	2.79683
MRPL58	-0.588931	2.79532
SCIN	1.35883	2.79504
MRPL36	-0.481757	2.78675
PTTG1IP	0.280878	2.78569
DOK5	1.03657	2.78199
UHRF2	-0.397679	2.78199
TBL2	-0.31913	2.7814
IDH1	0.276019	2.7814
TBCE	-0.416873	2.77871
FAM127A	-0.344568	2.77862
STIP1	-0.280941	2.77271
GLRX2	-0.548428	2.77219
RAB15	0.402522	2.76797
EIF6	-0.302182	2.76797
RAB13	0.292953	2.76733
COX20	-0.373276	2.76733
ARNTL2	-0.811145	2.76577
MAPRE3	-0.440818	2.76401
ANKRD13A	0.543076	2.76255
EIF3J	-0.338407	2.76255
EIF2D	0.385876	2.76003
KIAA0141	0.386994	2.75891
FAHD2B	-0.440163	2.7577
NDST1	-0.3783	2.75697
HNRNPM	0.243023	2.75697
MTG2	-0.397239	2.75697
PPIP5K2	-0.489226	2.75697
MERTK	1.98952	2.75697
PPAN	-0.371235	2.75685
PNISR	0.377314	2.74932
GLUD1	0.400198	2.74832
DESI1	-0.34925	2.745
DNAJA1	-0.252279	2.74456
COA6	-0.361218	2.74456
CST1	-0.263455	2.74456
AP000439.3	-1.46866	2.744
C1RL	0.601589	2.74245
CCDC113	-0.641823	2.73992
EMC6	-0.480878	2.73992
ADCY6	0.480264	2.73696
MYO1B	0.391805	2.73688
RAI14	0.614738	2.73251
BCAM	0.388908	2.72978
SPAG9	-0.419362	2.72533
CCDC43	-0.514913	2.72533
ITGB3	1.31654	2.72491
FAM136A	-0.398699	2.7243
METTL14	0.888569	2.72404
DNAJA2	-0.298911	2.71937
ENO1	-0.237665	2.71775
HYAL4	2.49176	2.71775
NNT	0.298719	2.71775
TLE4	-0.657969	2.71481
SDHAP1	0.644561	2.70973
ZBTB41	0.440389	2.70906
ECE2	-0.592449	2.70726
MRPL53	-0.40047	2.70617
DNAJC6	-0.761372	2.70592
UBE4A	-0.440491	2.70461
ATP6V0A2	-0.785162	2.70391
RPS16	-0.238252	2.70178
SERPINH1	0.315489	2.69955
PKP3	-0.56814	2.69808
ALPK1	0.637005	2.69591
RRAS	0.557341	2.69591
SEC23B	-0.374732	2.69467
CCDC22	-0.412025	2.69467
HPS1	0.484411	2.69467
STXBP5-AS1	-2.00038	2.69467
SEZ6L2	-0.307605	2.6937
DAP	-0.282299	2.69045
TXNL1	-0.371302	2.689
BCL3	-0.3081	2.68839
SF3B2	-0.305751	2.68839
FGF19	-1.47564	2.68591
RBM8A	-0.309157	2.6803
AC005077.14	-1.00715	2.67931
PRPF4	-0.420106	2.6785
ZCCHC10	-0.614888	2.67474
DUS1L	-0.342141	2.6713
ZBTB7C	-0.387409	2.6713
ACTA2	1.20894	2.66961
PRPF6	-0.295626	2.66938
BIRC3	0.533073	2.66893
RP11-834C11.4	-0.406497	2.66707
PRMT1	-0.304229	2.66547
CCT2	-0.314154	2.66503
SWAP70	0.646304	2.66358
NASP	0.364523	2.66123
PPP1R3E	0.770105	2.66087
LGALS3	0.286871	2.65815
SLC43A2	0.294416	2.65815
C17orf89	-0.468915	2.65815
DNAJB5	1.16144	2.65678
PDHA1	-0.368767	2.6564
CPNE2	0.491669	2.65474
IRF7	-0.822234	2.65383
FAIM	0.835118	2.65377
CLMP	-0.509681	2.65346
XRCC2	0.803409	2.65167
MB21D2	-0.768781	2.64967
TUBB6	0.974753	2.64857
CORO7	0.547859	2.64714
MAPK11	0.818221	2.64207
NBPF12	-0.417385	2.64008
IKBKAP	0.39012	2.63997
GSAP	0.526735	2.63962
FGFR3	1.12754	2.63892
DDX39A	-0.45469	2.63512
ZNF84	0.632625	2.63241
ACSL4	0.332348	2.63194
ICAM5	1.67937	2.63171
ATXN1	0.887099	2.62728
TEF	0.690016	2.62728
LCOR	0.764137	2.62506
PON2	0.276093	2.62115
ERN1	0.619943	2.62094
CCND3	-0.336831	2.62032
DHX30	-0.362905	2.61994
EXOSC4	-0.526844	2.61994
FBXO32	-0.537985	2.61838
RP11-568K15.1	0.741678	2.61724
ERLIN2	-0.37933	2.61706
STOM	0.305108	2.61615
CD79A	-0.353668	2.61416
CA2	-0.401898	2.61312
RP11-1035H13.3	0.801848	2.61312
RPL22L1	-0.384145	2.61211
FUCA1	0.415402	2.61205
CLDN2	0.233629	2.61029
B4GALNT1	-0.356648	2.61023
RGL2	0.566465	2.60869
CHMP4A	-0.37537	2.60852
COASY	0.30664	2.60243
NET1	-0.348757	2.60157
TGFB2-OT1	1.95188	2.60157
CIB1	0.282624	2.60107
RNF40	-0.393539	2.60087
NPHP3	0.60976	2.60071
MAGED2	0.283724	2.60024
TTC39C	-0.508554	2.59861
G3BP2	-0.389059	2.59818
PABPC1L	0.767525	2.5972
TTPAL	0.560763	2.59599
ARC	-1.03003	2.59526
SHPK	0.624061	2.59139
ABCA8	1.21965	2.58813
OST4	-0.331132	2.58809
ERO1B	0.554098	2.58709
FAM72C	2.15609	2.58671
LEO1	-0.373468	2.58319
CASP4	0.325826	2.58319
CHTF8	0.365889	2.58315
AP1M1	-0.317984	2.58057
HCP5	0.809243	2.58057
ZDHHC20	0.535082	2.5799
BOLA2	-0.621607	2.57979
NLRC5	0.604048	2.57935
MORF4L2	-0.251663	2.57618
ITGAL	3.13458	2.57595
PIP5KL1	1.6813	2.57251
ADGRE5	0.447647	2.57231
CLPP	-0.396214	2.56778
KIAA1211L	0.806227	2.56778
PIGK	-0.566668	2.56736
DLGAP5	0.708937	2.5648
CNN3	0.381285	2.56477
TMEM167A	-0.307609	2.56309
RASSF3	0.564512	2.56238
TAPBPL	0.888526	2.56027
ARID3A	-0.782396	2.55908
[truncated: 13,988 more rows]
