# Supplementary material for: Oncogenic PKA signaling increases c-MYC protein expression through multiple targetable mechanisms
Source: eLife. 2023 Jan 24;12:e69521. doi: 10.7554/eLife.69521 (PMC9925115; doi:10.7554/eLife.69521)
Supplement: Supplementary file 5. [file elife-69521-supp5.xlsx]

## Sheet: Sheet1
Kinase Inhibitor		mean	SD	N
VX-745		-3.61593	2.07091	3
Vemurafenib (PLX4032, RG7204)		-3.07894	1.31232	3
H 89 2HCl		-2.8589	1.47795	3
AZD6482		-2.82484	2.02963	3
PF-573228		-2.80674	1.34061	3
AC480 (BMS-599626)		-2.75773	1.13924	3
Tideglusib		-2.62741	1.11004	3
Enzastaurin (LY317615)		-2.47312	0.572353	3
SNS-314 Mesylate		-2.36802	0.374653	3
JNJ-7706621		-2.23778	0.219305	3
Hesperadin		-2.01118	0.226064	3
Momelotinib (CYT387)		-1.96526	0.995606	3
TG003		-1.84885	0.918639	3
AZ 628		-1.83923	0.145301	3
Sorafenib		-1.69849	1.29633	3
PIK-294		-1.66995	0.240059	3
Telatinib		-1.65052	1.16864	3
SB203580		-1.57631	1.0935	3
PD168393		-1.54921	0.854213	3
Triciribine		-1.52674	0.781486	3
Masitinib (AB1010)		-1.52195	1.16152	3
Voxtalisib (SAR245409, XL765) Analogue		-1.51009	0.139661	3
BI 2536		-1.49238	0.568029	3
SAR131675		-1.48946	1.74306	3
SB202190 (FHPI)		-1.47727	1.15204	3
Brivanib (BMS-540215)		-1.44589	0.8088	3
Pelitinib (EKB-569)		-1.37706	0.635001	3
Refametinib (RDEA119, Bay 86-9766)		-1.33927	1.65537	3
Tivantinib (ARQ 197)		-1.26325	0.511677	3
Imatinib Mesylate (STI571)		-1.2468	0.875324	3
GSK690693		-1.24233	0.857765	3
Skepinone-L		-1.20873	0.79288	3
SB216763		-1.2015	0.708381	3
Dasatinib		-1.18632	0.20446	3
Semaxanib (SU5416)		-1.16643	0.765079	3
Gefitinib (ZD1839)		-1.16573	1.25265	3
PD0325901		-1.16021	0.844207	3
BMS-754807		-1.16018	0.411993	3
GSK650394		-1.12178	1.14335	3
Ponatinib (AP24534)		-1.08676	0.703809	3
MK-5108 (VX-689)		-1.08243	1.02477	3
NVP-BSK805 2HCl		-1.07511	1.12919	3
SNS-032 (BMS-387032)		-1.06151	1.30123	3
VX-702		-1.05153	0.154237	3
U0126-EtOH		-1.01376	0.394542	3
Bay 11-7085		-0.97462	1.11042	3
Pimasertib (AS-703026)		-0.9676	0.824633	3
AS-604850		-0.96224	0.61747	3
Mubritinib (TAK 165)		-0.95214	0.949426	3
Vistusertib (AZD2014)		-0.93553	1.45214	3
TAK-285		-0.89141	0.767014	3
PF-477736		-0.88253	0.483733	3
PF-04691502		-0.87208	0.052578	3
BMS-265246		-0.86526	0.433674	3
GNE-9605		-0.85554	0.50539	3
Rociletinib (CO-1686, AVL-301)		-0.85541	0.713124	3
Amuvatinib (MP-470)		-0.82557	0.764647	3
BI-D1870		-0.81196	0.587218	3
AG-1024		-0.78402	0.696869	3
Foretinib (GSK1363089)		-0.7697	2.31245	3
AT7519		-0.7196	0.275418	3
AZD3463		-0.69532	0.235217	3
IMD 0354		-0.69203	0.498933	3
Afatinib (BIBW2992)		-0.68751	0.668058	3
Thiazovivin		-0.68592	0.812191	3
AG-490 (Tyrphostin B42)		-0.66756	1.36528	3
BX-795		-0.65818	0.971946	3
Uprosertib (GSK2141795)		-0.65744	0.152026	3
Bisindolylmaleimide I (GF109203X)		-0.6512	0.301432	3
Tepotinib (EMD 1214063)		-0.64491	0.456133	3
PHA-680632		-0.61952	0.276555	3
OSI-420		-0.58377	1.31814	3
Tivozanib (AV-951)		-0.57308	0.156439	3
Torkinib (PP242)		-0.54575	0.315848	3
AZD2932		-0.52546	0.25888	3
AMG-900		-0.50673	1.18514	3
TWS119		-0.50035	0.207308	3
Everolimus (RAD001)		-0.49665	1.12674	3
IPA-3		-0.46043	0.560885	3
NVP-BHG712		-0.43556	0.334994	3
Pazopanib HCl (GW786034 HCl)		-0.4296	0.492258	3
Quizartinib (AC220)		-0.41461	0.290847	3
CC-292 (AVL-292)		-0.41135	0.220332	3
CCT128930		-0.40356	1.41269	3
Selumetinib (AZD6244)		-0.40257	0.48666	3
Lenvatinib (E7080)		-0.39948	0.112799	3
MK-8745		-0.39415	0.962708	3
BMS-536924		-0.38709	0.413376	3
BMS-794833		-0.36957	0.316056	3
Aurora A Inhibitor I		-0.36655	0.291521	3
BMS-777607		-0.36008	1.2111	3
URMC-099		-0.36001	0.19367	3
CP-724714		-0.35576	0.163204	3
Losmapimod (GW856553X)		-0.34209	0.506618	3
Pazopanib		-0.33954	0.857519	3
Sorafenib Tosylate		-0.3348	0.663721	3
Piceatannol		-0.33287	0.203764	3
ZM 323881 HCl		-0.32843	0.215818	3
PD173074		-0.32098	0.214281	3
JNJ-38877605		-0.29943	0.5072	3
AG-1478 (Tyrphostin AG-1478)		-0.29013	0.519084	3
NVP-AEW541		-0.28393	0.658156	3
CUDC-907		-0.25835	0.920622	3
Binimetinib (MEK162, ARRY-162, ARRY-438162)		-0.25445	0.150522	3
Vatalanib (PTK787) 2HCl		-0.25412	0.58705	3
SL-327		-0.25264	0.358423	3
GZD824 Dimesylate		-0.2462	0.263879	3
RN486		-0.24402	0.382573	3
PP121		-0.24074	0.64525	3
Fedratinib (SAR302503, TG101348)		-0.23464	0.433504	3
Osimertinib (AZD9291)		-0.22549	0.343632	3
CUDC-101		-0.21735	0.348542	3
SU11274		-0.21393	0.71558	3
BIX 02188		-0.208	0.313969	3
ZM 336372		-0.18775	0.866024	3
Volasertib (BI 6727)		-0.18585	0.533657	3
AZD1480		-0.16645	0.462661	3
PI-103		-0.16289	0.28448	3
TPCA-1		-0.15643	0.511982	3
Genistein		-0.14767	0.516116	3
TGX-221		-0.14385	0.28155	3
MK-2461		-0.12188	0.424985	3
Ridaforolimus (Deforolimus, MK-8669)		-0.10219	0.360196	3
Tie2 kinase inhibitor		-0.10143	0.65821	3
PIK-93		-0.07889	0.100692	3
MK-2206 2HCl		-0.07456	0.538068	3
KN-62		-0.07012	0.102173	3
Temsirolimus (CCI-779, NSC 683864)		-0.06978	1.1082	3
Degrasyn (WP1130)		-0.05341	0.153276	3
Sunitinib Malate		-0.04896	0.258805	3
WZ3146		-0.03592	0.214501	3
Buparlisib (BKM120, NVP-BKM120)		-0.01749	0.384216	3
CNX-2006		-0.00318	1.29291	3
PHA-665752		0.003634	0.669596	3
Rigosertib (ON-01910)		0.007033	0.24855	3
TG101209		0.018094	0.38472	3
GSK2334470		0.025131	0.544	3
Varlitinib		0.025927	0.813504	3
Dinaciclib (SCH727965)		0.030975	0.75583	3
ALK-IN-1		0.033267	0.402967	3
Go 6983		0.041678	0.363417	3
Crenolanib (CP-868596)		0.044358	0.765792	3
Gandotinib (LY2784544)		0.049034	0.536314	3
Palomid 529 (P529)		0.068217	0.423538	3
Motesanib Diphosphate (AMG-706)		0.069121	0.212476	3
A66		0.071659	0.258779	3
Y-27632 2HCl		0.072696	0.186882	3
Linifanib (ABT-869)		0.076967	0.566211	3
Dabrafenib (GSK2118436)		0.078676	0.035915	3
WZ8040		0.081048	0.26411	3
S-Ruxolitinib (INCB018424)		0.086795	0.690308	3
PHA-793887		0.088854	0.236799	3
Fingolimod (FTY720) HCl		0.095957	0.623269	3
AZ20		0.098251	0.413328	3
Apatinib		0.121086	0.327643	3
Asiatic Acid		0.124388	0.461508	3
AZD8330		0.131612	0.354486	3
NVP-BVU972		0.136947	0.934202	3
PF-04217903		0.157588	1.63303	3
PF-00562271		0.158923	0.591089	3
PIK-293		0.160119	0.683111	3
CZC24832		0.160294	0.765081	3
PF-4708671		0.163704	0.730442	3
AZD1208		0.166127	0.49286	3
Idelalisib (CAL-101, GS-1101)		0.166321	0.224124	3
PD173955		0.168676	0.221654	3
Apitolisib (GDC-0980, RG7422)		0.169023	0.424879	3
PLX-4720		0.170385	0.092564	3
BAY 11-7082		0.176814	0.628578	3
AT9283		0.177777	0.394077	3
RAF265 (CHIR-265)		0.193461	0.260436	3
Saracatinib (AZD0530)		0.194474	0.280581	3
JNK Inhibitor IX		0.194582	0.750786	3
CHIR-99021 (CT99021)		0.201814	0.23078	3
HMN-214		0.209946	0.362315	3
3-Methyladenine (3-MA)		0.218508	0.673891	3
SKI II		0.218642	0.195591	3
WZ4002		0.221272	0.370755	3
OSU-03012 (AR-12)		0.225319	0.195094	3
AZD1080		0.226256	0.617658	3
DDR1-IN-1		0.226389	0.347624	3
SB415286		0.229043	0.577015	3
KN-93 Phosphate		0.230449	0.534514	3
Honokiol		0.236721	0.156334	3
IKK-16 (IKK Inhibitor VII)		0.237156	0.330628	3
Ruxolitinib (INCB018424)		0.241894	0.220104	3
Nintedanib (BIBF 1120)		0.242174	0.430901	3
Tofacitinib (CP-690550,Tasocitinib)		0.243127	0.463342	3
CAY10505		0.243679	0.319132	3
Flavopiridol (Alvocidib)		0.251245	0.253518	3
SB590885		0.258845	0.201617	3
Dacomitinib (PF299804, PF299)		0.260318	0.814569	3
Zotarolimus(ABT-578)		0.263559	0.451998	3
R547		0.271961	0.436274	3
PFK15		0.275681	0.493314	3
TAK-901		0.277643	0.450575	3
AEE788 (NVP-AEE788)		0.278194	0.605507	3
Crizotinib (PF-02341066)		0.280552	0.541991	3
ZM 447439		0.281094	0.479088	3
Roscovitine (Seliciclib,CYC202)		0.28312	0.304815	3
RKI-1447		0.288599	0.42183	3
PHA-767491		0.308609	0.589562	3
CGK 733		0.308621	0.511943	3
Bosutinib (SKI-606)		0.308782	0.563958	3
VS-5584 (SB2343)		0.309964	0.575914	3
AZD5438		0.321499	0.535819	3
Dovitinib (TKI-258) Dilactic Acid		0.321942	0.377608	3
Nilotinib (AMN-107)		0.322398	0.586552	3
Tozasertib (VX-680, MK-0457)		0.324092	0.424877	3
PH-797804		0.325142	0.621055	3
Ibrutinib (PCI-32765)		0.336542	0.396612	3
Ceritinib (LDK378)		0.337173	0.651512	3
XL019		0.341853	0.555499	3
Danusertib (PHA-739358)		0.347802	0.072925	3
CYC116		0.351606	0.27564	3
OSI-027		0.362175	0.508073	3
CGI1746		0.367023	0.264221	3
AICAR (Acadesine)		0.370755	0.819914	3
PF-543		0.377623	0.24296	3
Rebastinib (DCC-2036)		0.382196	0.337261	3
BX-912		0.384431	0.10069	3
Orantinib (TSU-68, SU6668)		0.387954	0.60621	3
CHIR-98014		0.392142	0.295142	3
Schisandrin B (Sch B)		0.407484	0.204646	3
AZD7762		0.407716	0.474974	3
CX-6258 HCl		0.408259	0.472072	3
WYE-354		0.410765	0.443065	3
XMD8-92		0.412554	1.60208	3
Rapamycin (Sirolimus)		0.42245	0.165348	3
WP1066		0.427123	0.587308	3
SGI-1776 free base		0.435771	0.197632	3
WAY-600		0.436778	0.062269	3
Ro3280		0.437574	0.1947	3
Dovitinib (TKI-258, CHIR-258)		0.442171	0.460314	3
ERK5-IN-1		0.443753	0.168223	3
AMG-458		0.44631	0.457178	3
Tyrphostin 9		0.447822	0.244678	3
AZD2858		0.448292	0.300851	3
KW-2449		0.448641	0.254803	3
Alisertib (MLN8237)		0.451193	0.632352	3
A-769662		0.457057	0.291624	3
Fostamatinib (R788)		0.458258	0.736586	3
Sapitinib (AZD8931)		0.472212	0.465	3
PP2		0.473731	0.494998	3
GNF-2		0.475481	0.563999	3
Doramapimod (BIRB 796)		0.4791	0.81613	3
SP600125		0.47989	0.645819	3
TIC10 Analogue		0.481106	0.401435	3
FRAX597		0.491289	0.115216	3
KU-0063794		0.495023	0.186909	3
HS-173		0.507239	0.62172	3
Fasudil (HA-1077) HCl		0.511321	0.418501	3
AZ 960		0.513352	0.610564	3
BGT226 (NVP-BGT226)		0.514226	0.382788	3
CNX-774		0.51929	0.213445	3
Golvatinib (E7050)		0.521451	0.136486	3
Alpelisib (BYL719)		0.523994	0.280075	3
TAK-632		0.529414	0.945072	3
Brivanib Alaninate (BMS-582664)		0.530983	0.224034	3
R406 (free base)		0.533038	0.552899	3
PD98059		0.537725	0.200127	3
Chrysophanic Acid		0.538576	0.300941	3
Omipalisib (GSK2126458, GSK458)		0.539194	0.317491	3
Barasertib (AZD1152-HQPA)		0.540204	0.23924	3
LDC000067		0.544766	1.08875	3
CP-673451		0.545809	0.40222	3
Cabozantinib malate (XL184)		0.553308	0.015487	3
Cabozantinib (XL184, BMS-907351)		0.561456	0.356521	3
CHIR-124		0.561571	0.435455	3
BS-181 HCl		0.57715	0.30491	3
Duvelisib (IPI-145, INK1197)		0.585241	0.949956	3
Tyrphostin AG 879		0.585314	0.304962	3
VE-822		0.590246	0.386448	3
Cediranib (AZD2171)		0.59996	0.471766	3
PD184352 (CI-1040)		0.606295	0.250705	3
CH5132799		0.617135	0.293195	3
Linsitinib (OSI-906)		0.624069	0.401712	3
PD318088		0.627805	0.221654	3
ENMD-2076		0.627873	0.188195	3
WYE-125132 (WYE-132)		0.630737	0.768451	3
Ki8751		0.631195	0.38508	3
BIO		0.637647	0.619201	3
MLN2480		0.646602	0.279496	3
TG100-115		0.648977	0.226036	3
GSK1838705A		0.649156	0.557252	3
PP1		0.653433	0.483756	3
JNK-IN-8		0.656576	0.222345	3
A-674563		0.657201	0.125558	3
SSR128129E		0.660548	0.441332	3
NU6027		0.661674	0.188982	3
Icotinib		0.676283	0.524201	3
BIX 02189		0.690109	0.341203	3
R406		0.701344	0.403569	3
KRN 633		0.704145	0.077459	3
GNE-0877		0.707259	0.756941	3
WZ4003		0.708071	0.10921	3
LY2603618		0.709196	0.311072	3
KX2-391		0.710701	0.453303	3
KU-55933 (ATM Kinase Inhibitor)		0.730796	0.278532	3
CHIR-99021 (CT99021) HCl		0.735876	0.707937	3
GSK461364		0.73706	0.179977	3
GSK1904529A		0.74396	0.537218	3
WHI-P154		0.753407	0.37957	3
Sotrastaurin		0.763586	0.465494	3
AR-A014418		0.770723	0.601749	3
YM201636		0.774866	0.244741	3
GDC-0879		0.788218	0.054017	3
OSI-930		0.791831	0.216431	3
Torin 2		0.795636	0.287932	3
AT7867		0.815329	0.242875	3
AST-1306		0.819188	0.262773	3
Lapatinib		0.823025	0.366787	3
LY294002		0.82807	0.370599	3
Axitinib		0.834327	0.440678	3
GW441756		0.840415	0.287934	3
Lapatinib (GW-572016) Ditosylate		0.841625	0.225347	3
ZSTK474		0.851901	0.608029	3
Tofacitinib (CP-690550) Citrate		0.855434	0.323864	3
INK 128 (MLN0128)		0.870952	0.172701	3
10058-F4		0.871705	0.435566	3
Flavopiridol HCl		0.893925	0.421759	3
KU-60019		0.915302	0.162775	3
MGCD-265		0.918768	0.363768	3
AZD8055		0.926142	0.450102	3
Trametinib (GSK1120212)		0.929031	0.427724	3
abemaciclib (LY2835219)		0.938917	0.803382	3
Milciclib (PHA-848125)		0.948782	0.326547	3
SC-514		0.980488	0.161497	3
TAK-715		0.99607	0.356027	3
CEP-33779		1.01246	0.271119	3
Indirubin		1.02194	0.657213	3
GSK429286A		1.02319	0.738131	3
TAK-733		1.03697	0.623896	3
Ipatasertib (GDC-0068)		1.04905	0.138547	3
PF-562271		1.06792	0.308074	3
Pictilisib (GDC-0941)		1.0754	0.184014	3
Phenformin HCl		1.07993	0.297993	3
Quercetin		1.09535	0.507004	3
PF-3758309		1.12082	0.473586	3
TDZD-8		1.12354	0.938337	3
LY2090314		1.17012	1.08906	3
PHT-427		1.17299	0.771145	3
AZD4547		1.17659	0.414161	3
ZM 306416		1.1827	0.670953	3
MLN8054		1.20075	0.422663	3
AS-252424		1.20801	0.574588	3
TAE226 (NVP-TAE226)		1.29759	1.19838	3
EHop-016		1.37611	0.261199	3
GW5074		1.53216	0.349644	3
Daphnetin		1.53454	0.801849	3
HTH-01-015		1.62431	0.120696	3
Regorafenib (BAY 73-4506)		2.00306	0.80626	3
