# Supplementary figures and images for: Oncogenic PKA signaling increases c-MYC protein expression through multiple targetable mechanisms
Source: eLife journal article supplement (doi:10.7554/elife.69521), 2023-01-24

FLX1

0 1.25 5 20  $\mu$ M H89

130-

pPKA  
substrate

216 214

pKA

pL-pKA  
= pKA

1-4  
6-8

9-12  
13-16

KT  
can  
KT  
can  
KT  
can  
KT  
can



2Lp1

11/30/22

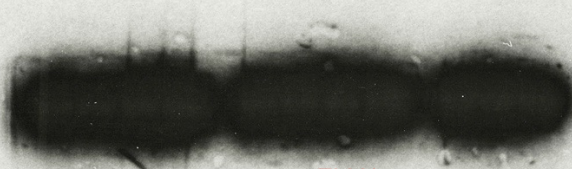

FLX1

0 1.25 5 20  $\mu$ M H89

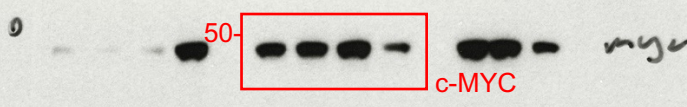

50

c-MYC

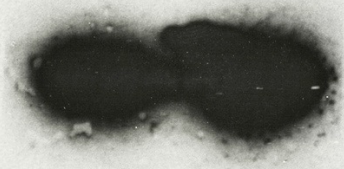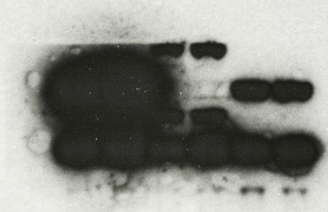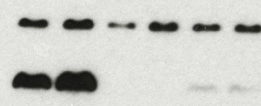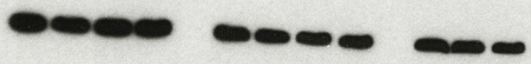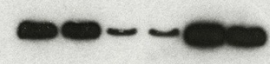



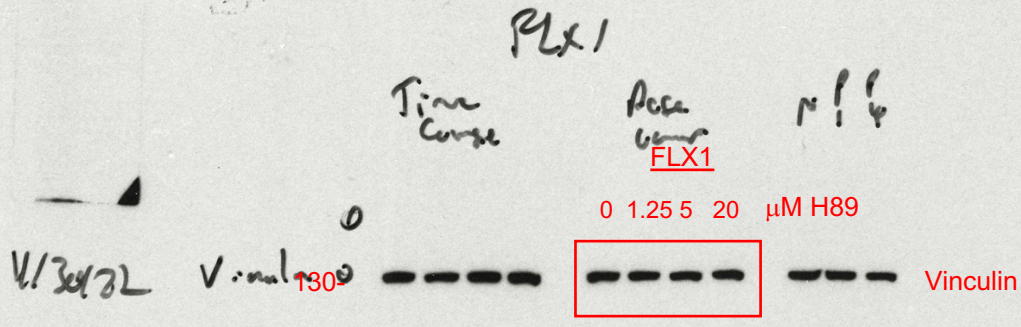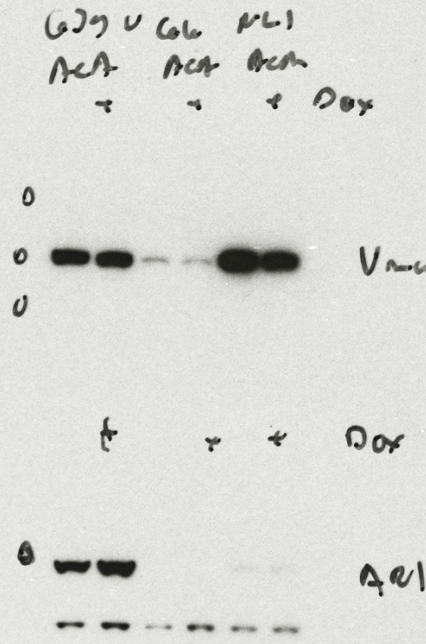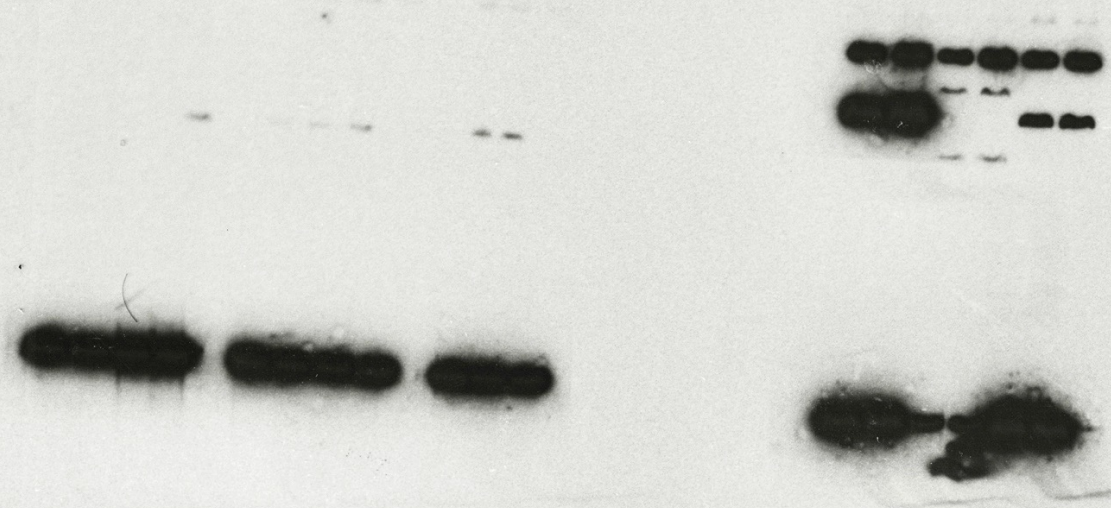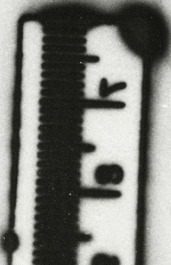

Supplement: fig3-data5 [file 3E markup.pdf › 3E/3E markup.pdf]
